# Supplementary material for: The Osteogenesis Imperfecta Type V Mutant BRIL/IFITM5 Promotes Transcriptional Activation of MEF2, NFATc, and NR4A in Osteoblasts
Source: MDPI journal article supplement (doi:10.3390/ijms23042148), 2022-02-15
Supplement: s1 [file s1]

# The osteogenesis imperfecta type V mutant BRIL/IFITM5 promotes transcriptional activation of MEF2, NFATc, and NR4A in osteoblasts.

Vincent Maranda <sup>1</sup>, Marie-Hélène Gaumond <sup>1</sup> and Pierre Moffatt <sup>1,2,3,\*</sup>

Supplemental Figures S1 and S2

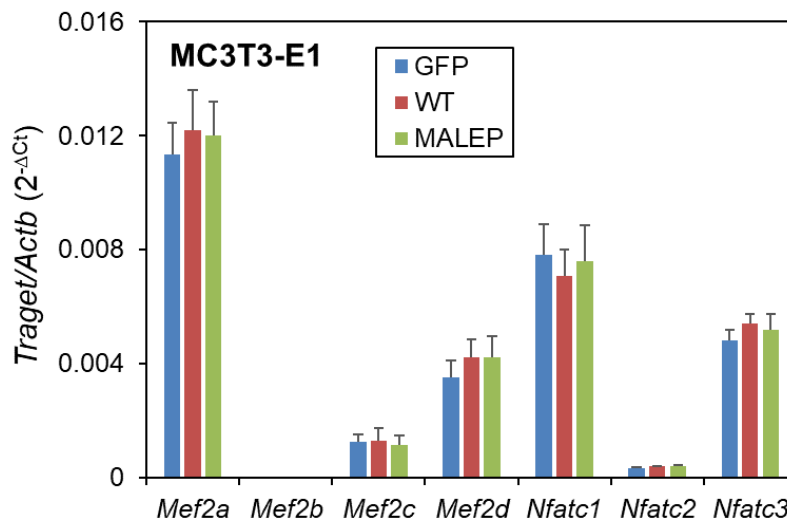

**Figure S1. Gene expression monitoring for *Mef2* and *Nfatc* by qPCR in transfected MC3T3-E1 cells.** Total RNA was collected 24 h after transfection with expression plasmids encoding GFP, WT- and MALEP BRIL in MC3T3-E1. RT-qPCR was performed to analyze the various targets indicated. Expression levels are expressed as  $2^{-\Delta Ct}$  as normalized to  $\beta$ -actin (*Actb*). Data represents average  $\pm$  SD (n=4).

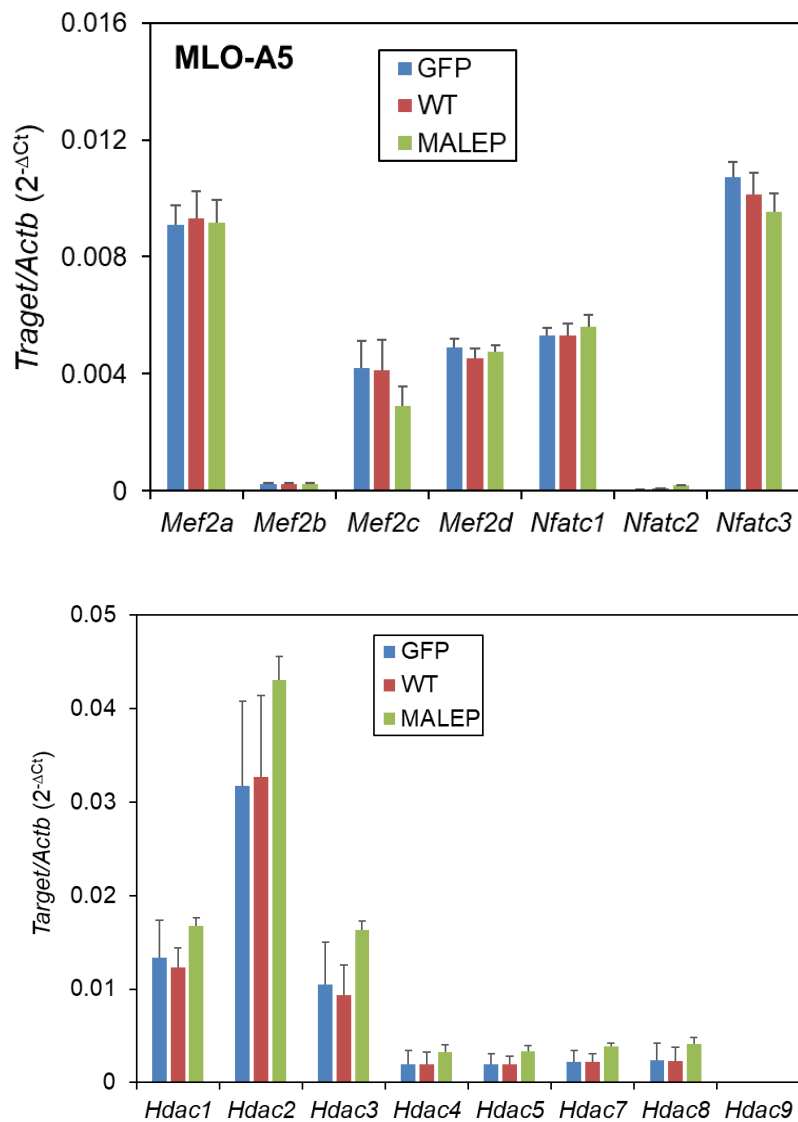

**Figure S2. Gene expression monitoring for *Mef2*, *Nfatc*, and *Hdac* by qPCR in transfected MLO-A5 cells.** Total RNA was collected 24 h after transfection with expression plasmids encoding GFP, WT- and MALEP BRIL in the MLO-A5 cells. RT-qPCR was performed to analyze the various targets indicated (top panel, *Mef2* and *Nfatc*; bottom panel, *Hdac*). Expression levels are expressed as  $2^{-\Delta Ct}$  as normalized to  $\beta$ -actin (*Actb*). Data represents average  $\pm$  SD (n=3).
