# Supplementary material for: The Osteogenesis Imperfecta Type V Mutant BRIL/IFITM5 Promotes Transcriptional Activation of MEF2, NFATc, and NR4A in Osteoblasts
Source: MDPI journal article supplement (doi:10.3390/ijms23042148), 2022-02-15

Pertaining to Figure 2E

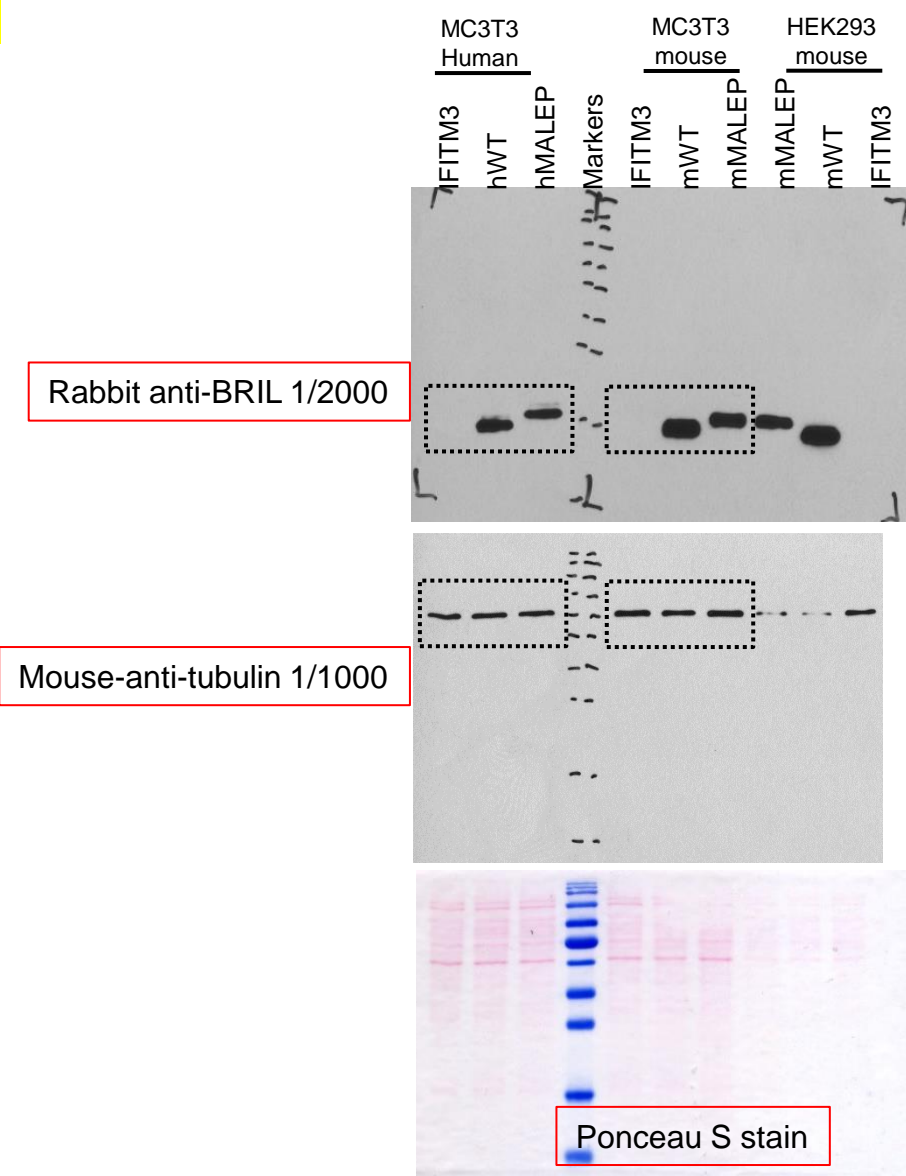

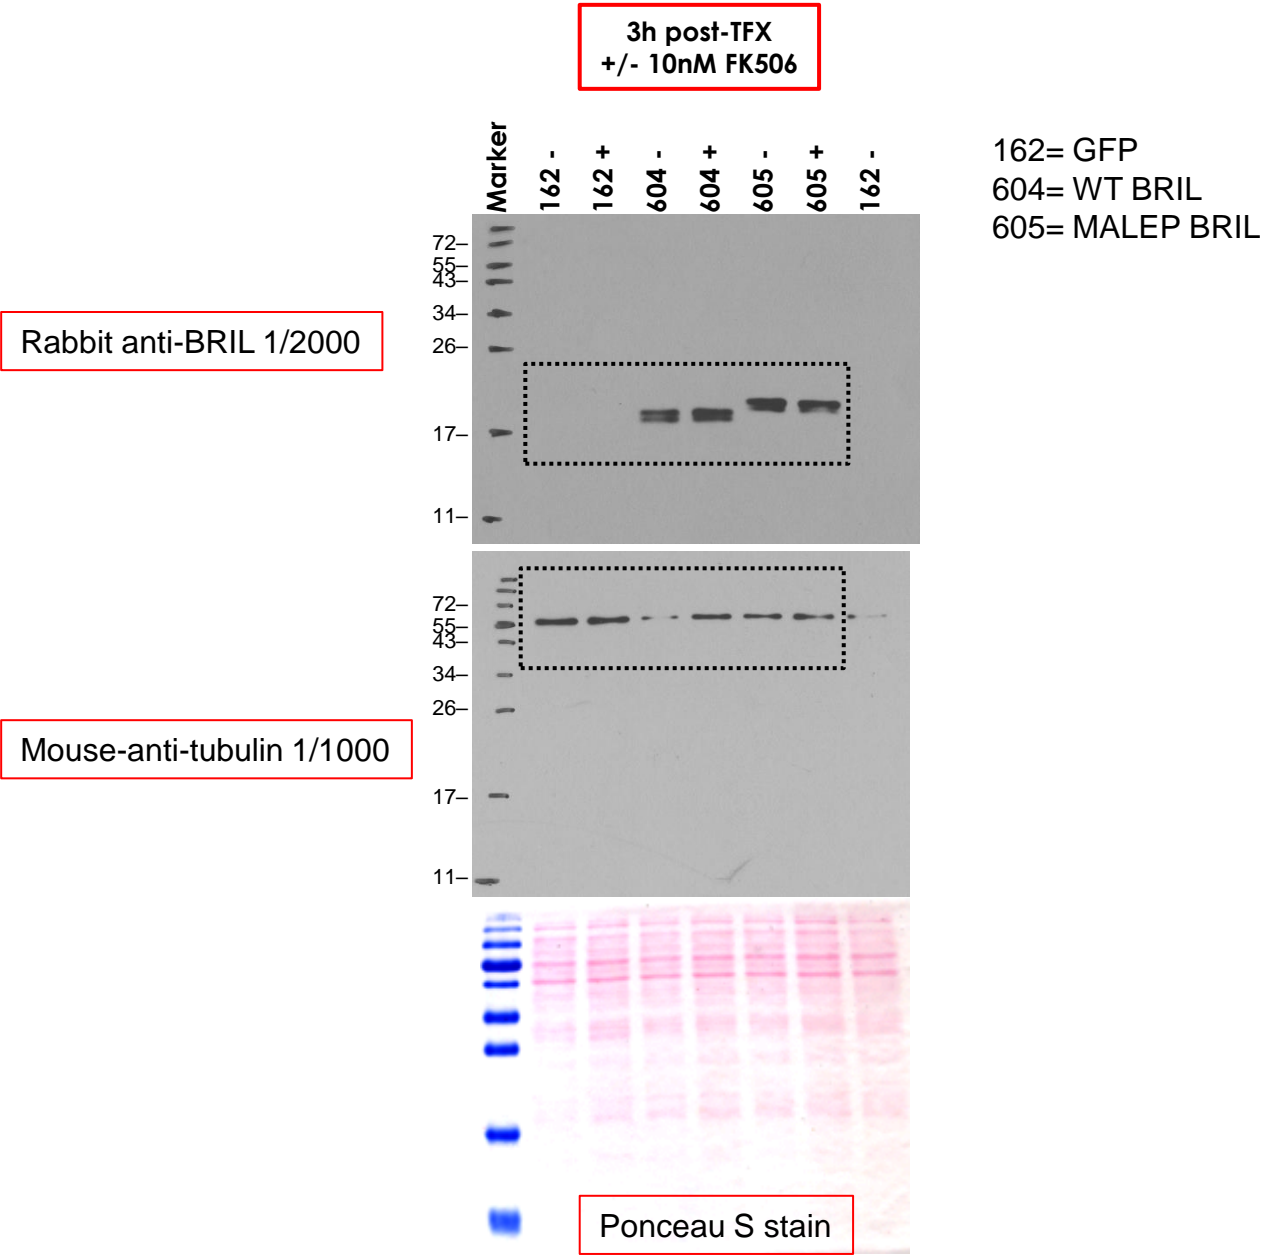

Pertaining to Figure 5C

162= GFP  
604= WT BRIL  
605= MALEP BRIL

Rabbit anti-BRIL 1/2000

Mouse-anti-tubulin 1/1000

Ponceau S stain

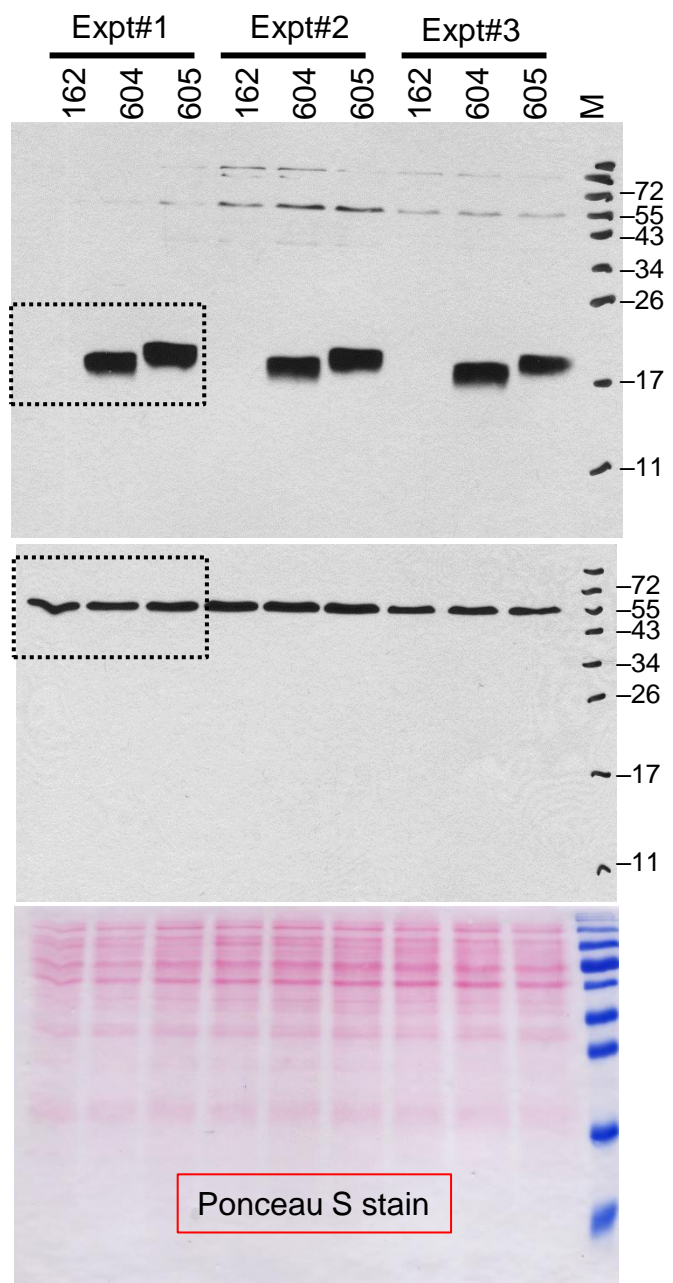

Pertaining to Figure 5D

Rabbit anti-BRIL 1/2000

Mouse-anti-tubulin 1/1000

Ponceau S stain

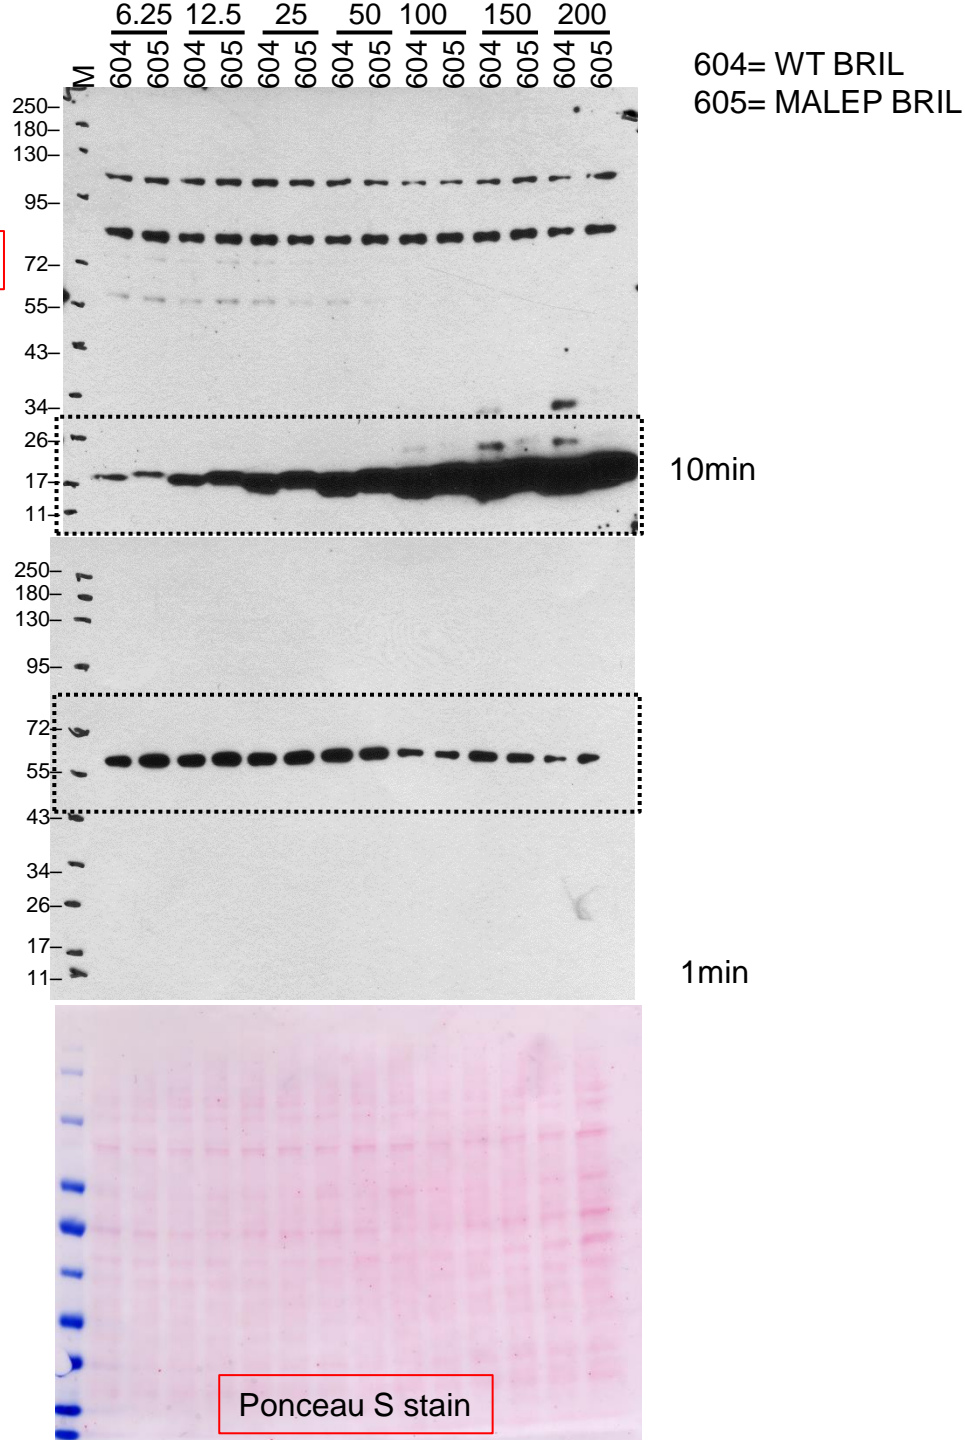

**Pertaining to Figure 6C**

Rabbit anti-BRIL 1/2000

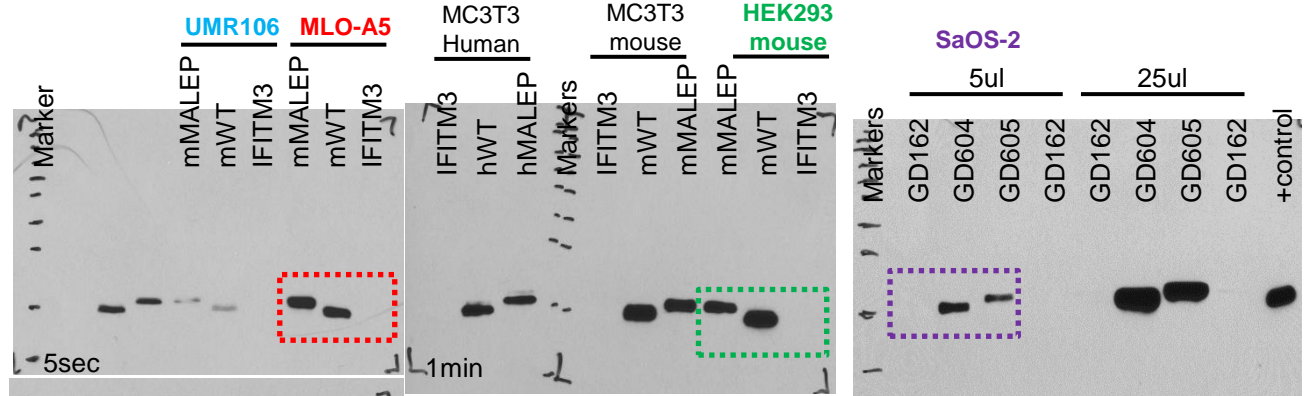

Mouse-anti-tubulin 1/1000

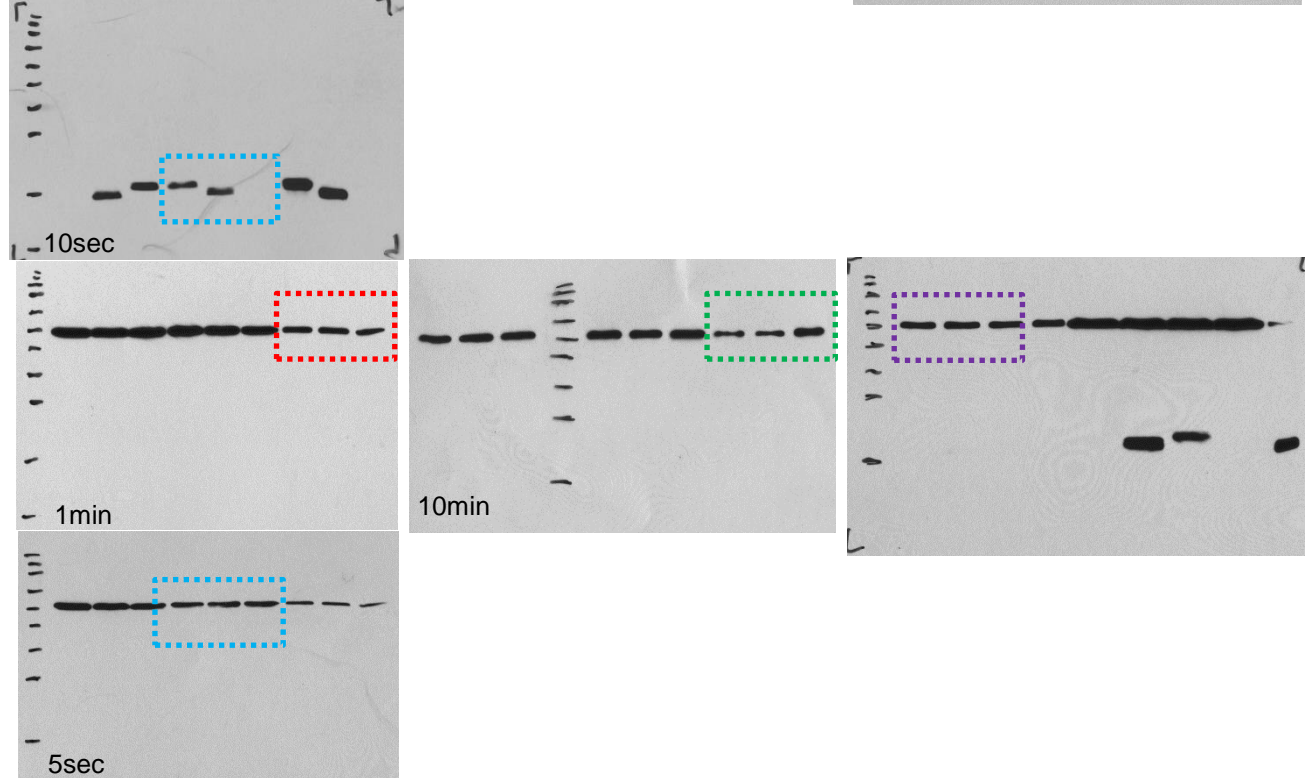

Ponceau S stain

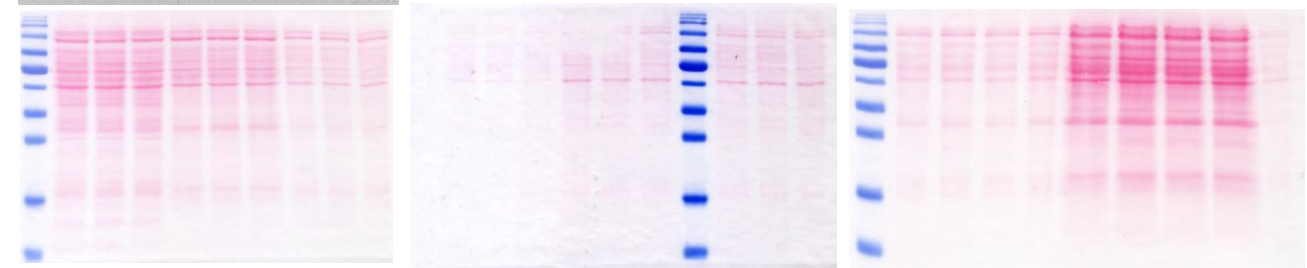



Pertaining to figure 9A (HEK293)

Co-IB  
Anti-BRIL  
Anti-CAML

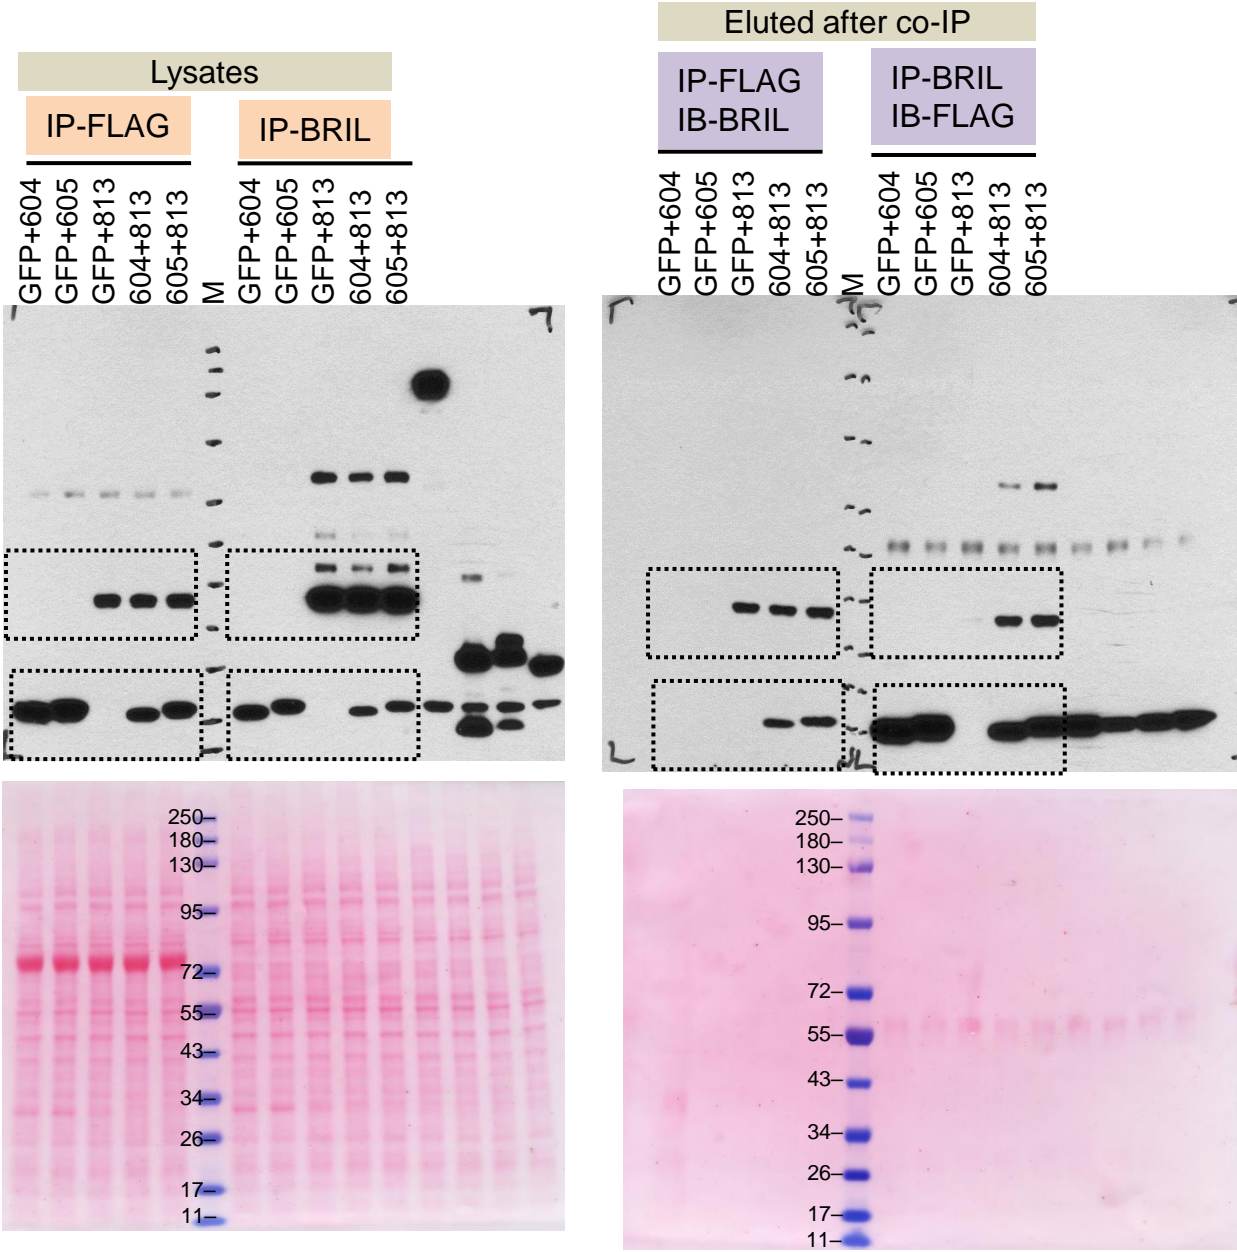

**Pertaining to figure 9B  
(MLO-A5)**

Rabbit anti-BRIL 1/2000

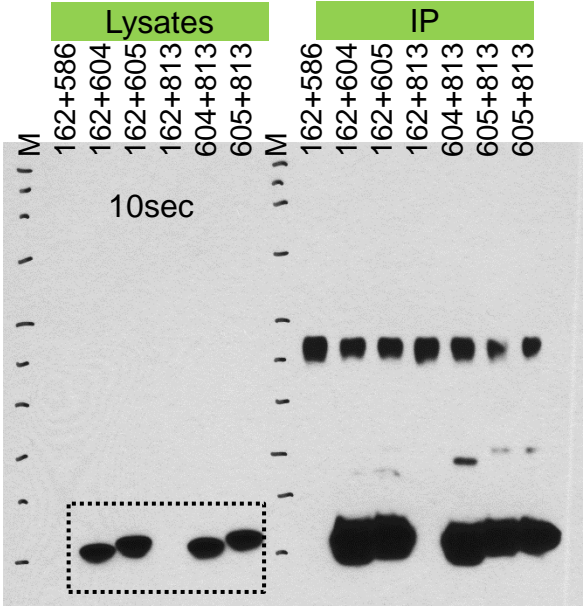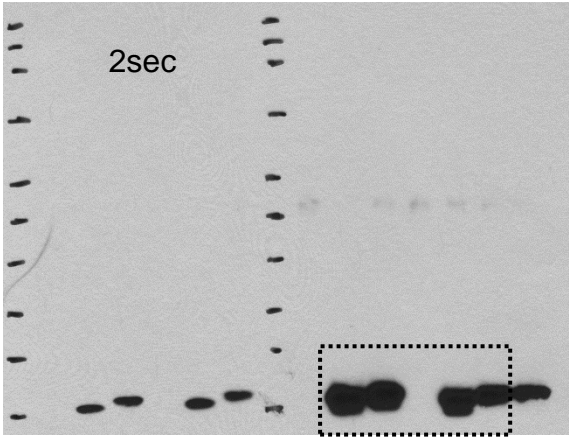

Rabbit anti-FLAG 1/2000

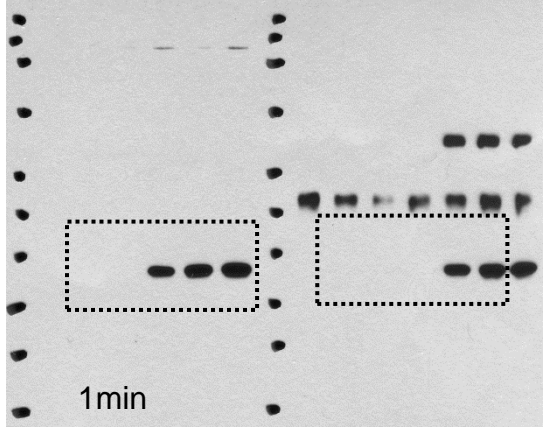

586= empty CMV plasmid  
162= GFP  
604= WT BRIL  
605= MALEP-BRIL  
813= FLAG-CAML

Ponceau S stain

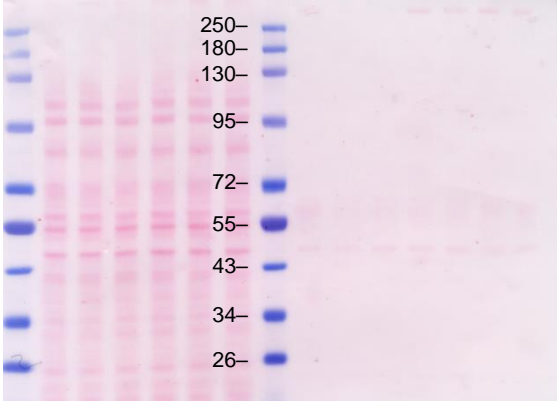

Supplement: s1 [file s1]
