# Supplementary material for: The Osteogenesis Imperfecta Type V Mutant BRIL/IFITM5 Promotes Transcriptional Activation of MEF2, NFATc, and NR4A in Osteoblasts
Source: Int J Mol Sci. 2022 Feb 15;23(4):2148. doi: 10.3390/ijms23042148 (PMC8875491; doi:10.3390/ijms23042148)
Supplement: Supplementary file 1 [file ijms-23-02148-s001.zip]

Archive with 7 entries (7 files):
- Non-cropped images IJMS.pdf
- Supplemental Figures S1 and S2.pdf
- Supplemental Table S1_List of luciferase reporters_updated.xlsx
- Supplemental Table S2_List of expression plasmids.xlsx
- Supplemental Table S3_List of oligonucleotides and primers.xlsx
- Supplemental Table S4_List of mouse Taman probes.xlsx
- Supplemental Table S5_Y2H_data.xlsx
