# Supplementary material for: The Osteogenesis Imperfecta Type V Mutant BRIL/IFITM5 Promotes Transcriptional Activation of MEF2, NFATc, and NR4A in Osteoblasts
Source: Int J Mol Sci. 2022 Feb 15;23(4):2148. doi: 10.3390/ijms23042148 (PMC8875491; doi:10.3390/ijms23042148)
Supplement: Supplementary file 1 [file ijms-23-02148-s001.zip › Supplemental Table S1_List of luciferase reporters_updated.xlsx]

## Sheet: Sheet1
Supplemental Table S1. List of luciferase reporters.
Reporter	Name	Source	Transcription factor	Binding element sequence	Ref.
EGR1	Early growth response 1	Cignal	EGR1	CGCCCCCGCG
NANOG	Nanog homeobox	Cignal	NANOG	ACCCTTCGCCGATTAAGTACTTAA
GATA		Cignal	GATA	GGCATTCTCTATCTGATTGTT
GLI	Glioma-associated oncogene	Cignal	GLI	GACCACCCAC
XRE	Xenobiotic response element	Cignal	AhR	TGAGTTCTCACGCTAGCAGAT
ERSE	ER stress response	Cignal	ATF6	CCTTCACCAATCGGCGGCCTCCACGACGG
NFAT	Nuclear factor of activated T-cells	pGL3-NFAT luciferase was a gift from Jerry Crabtree (Addgene plasmid # 17870)	NFATC1	GGAGGAAAAACTGTTTCATACAGAAGGCGT
NOTCH	Recombining binding protein suppressor of hairless	Cignal	RBP-Jk	CGTGGGAA
FOXO	Forkhead box	Cignal	FOXO	GATCAAGTAAACAACTATGTAAACAA
PPAR	Peroxisome proliferator-activated receptor	Cignal	PPAR	TCGACAGGGGACCAGGACAAAGGTCACGTTCGGGAC
STAT3	Signal transducer and activator of transcription 3	Cignal	STAT3	GTCGACATTTCCCGTAAATCGTCGA
HIF	Hypoxia-inducible factor-1	Cignal	HIF-1	TACGTGCT
SBE	Mothers against decapentaplegic	SBE4-Luc was a gift from Bert Vogelstein (Addgene plasmid # 16495)	SMAD2/3	AGCCAGACA
COX2	Prostaglandin-endoperoxide synthase 2 (COX2)	In-house	multiple	1132bp upstream of the translational start site
Top-Flash	Wnt / R-spondin	M50 Super 8x TOPFlash was a gift from Randall Moon (Addgene plasmid # 12456)	bCAT/TCF	AGATCAAAGGgggta
COL2-ENH	Collagen type II / SRY-box 9	Dr. Veronique Lefebvre (Children's Hospital of Philadelphia Research Institute)	SOX9	CTGTGAATCGGGCTCTGTATGCGCTTGAGAAAAGCCCCATTCATGAGA	Mol Cell Biol 1996 16, 4512–4523
RUNX2	Runt-related transcription factor 2	In-house	RUNX2	TCACCAACCACAGCAA
AP1	Activating protein 1	3xAP1pGL3 was a gift from Alexander Dent (Addgene plasmid # 40342)	c-JUN/c-FOS	TGACTCA
CREB	cAMP Response Element-Binding Protein	In house	CREB	TGACGTCA
NurRE	Nuclear receptor subfamily 4 group A member 2	Dr. Jacques Drouin (Clinical Research Institute of Montreal)	NR4A2	TGACCTTTACCTCCAAAGGTCA	Mol. Cel. Biol. 1999, 19(11) 7549
MEF2	Myocyte enhancer factor 2	Cignal	MEF2C	CTAGCGCTCTAAAAATAACCCT
NF-KB	Nuclear Factor kappa-light-chain-enhancer of activated B cells	In house	P50-P65-Rel	GGGACTTTCC
SP1	Specificity protein 1/BRIL promoter	In house	SP1	GGGCGGGC	J Biol Chem. 2013 10;288(19):13278-94.
DLX5/SP7	Distal less homeobox 4/osterix	In house	DLX5/SP7	TAATTATAGGTT
IFN	Interferon type I	Cignal	STAT1/2	TAGTTTCACTTTCCC
SIF/IL6	Cytokine response element	Cignal	STAT3	GTCGACATTTCCCGTAAATCGTCGA
AARE	Amino acid deprivation	Dr. Gerard Karsenty (Columbia University)	ATF4	GATCCTCCCCTGCTCCTCCTGCTTACATCAGAGAGCACA	J Biol Chem. 1999 Oct 15;274(42):30182-9
RUNX2	RUNX family transcription factor 2	In house	RUNX2	CACCAACCACAG
pGL4b	Empty luciferase control	Promega E6651	none
