# Supplementary material for: The Osteogenesis Imperfecta Type V Mutant BRIL/IFITM5 Promotes Transcriptional Activation of MEF2, NFATc, and NR4A in Osteoblasts
Source: Int J Mol Sci. 2022 Feb 15;23(4):2148. doi: 10.3390/ijms23042148 (PMC8875491; doi:10.3390/ijms23042148)
Supplement: Supplementary file 1 [file ijms-23-02148-s001.zip › Supplemental Table S2_List of expression plasmids.xlsx]

## Sheet: Sheet1
Supplemental Table S2: List of expression plasmids
cDNA	Name	Source	Promoter	Comment	Ref.
hMEF2C	Human Myocyte enhancer factor 2C	Dr. Xiang-Jiao Yang, McGill University, Montreal, Canada	CMV		Mol Cell Biol, 2005. 25(6): 2273
hHDAC4	Human histone deacylase 4	Dr. Xiang-Jiao Yang, McGill University, Montreal, Canada	CMV		Mol Cell Biol, 1999. 19(11): 7816
hNFATc1	Human nuclear factor of activated t cells 1 (hNFATC1)	pCR4 hNFATc1-EE was a gift from Jerry Crabtree (Addgene plasmid # 17857)	bacterial
mPpp3ca	Calcineurin A (CnA)	pBJ5-CnA was a gift from Anjana Rao (Addgene plasmid # 11785)	RSV
mRcan1	Regulator of calcineurin 1 (RCAN)	RCAN1 was a gift from Jeffery Molkentin (Addgene plasmid # 65413)	CMV
rNr4a3	Rat NR4A3	Dr. Jacques Drouin	CMV		Cell (1991) 65:1255
mIfitm3	Mouse interferon induced transmembrane protein 3 (mIFITM3)	Origene MR200854	CMV	C-terminally FLAG tagged
mCaml	Mouse calcium modulating ligand (Caml)	Origene MR204041	CMV	C-terminally FLAG tagged
mIfitm5-WT	Mouse interferon induced transmembrane protein 5 (mIFITM5-WT)	In house	CMV		J Bone Miner Res. 2014 29(9): 2004
mIfitm5-MALEP	Mouse interferon induced transmembrane protein 5 (mIFITM5-MALEP)	In house	CMV		J Bone Miner Res. 2014 29(9): 2004
hIFITM5-WT	Mouse interferon induced transmembrane protein 5 (mIFITM5-WT)	In house	CMV		J Bone Miner Res. 2014 29(9): 2004
mIFITM5-MALEP	Mouse interferon induced transmembrane protein 5 (mIFITM5-MALEP)	In house	CMV		J Bone Miner Res. 2014 29(9): 2004
hEXOC5	Human exocyst complex component 5	Origene RC207906	CMV	C-terminally FLAG tagged
hUBQLN1	Human ubiquilin 1	Origene RC206897	CMV	C-terminally FLAG tagged
