# Supplementary material for: The Osteogenesis Imperfecta Type V Mutant BRIL/IFITM5 Promotes Transcriptional Activation of MEF2, NFATc, and NR4A in Osteoblasts
Source: Int J Mol Sci. 2022 Feb 15;23(4):2148. doi: 10.3390/ijms23042148 (PMC8875491; doi:10.3390/ijms23042148)
Supplement: Supplementary file 1 [file ijms-23-02148-s001.zip › Supplemental Table S3_List of oligonucleotides and primers.xlsx]

## Sheet: Sheet1
Supplemental Table S3: List of oligonucleotide and primer sequences
Name	Sequence (5’ > 3’)	Purpose	Notes
Stat1/2-FWD	tcgagTAGTTTCACTTTCCCGTTAGTTTCACTTTCCCGTTAGTTTCACTTTCCC	STAT1/2-Luciferase reporter cloning	XhoI overhang lower case
Stat1/2-REV	agctGGGAAAGTGAAACTAACGGGAAAGTGAAACTAACGGGAAAGTGAAACTA	STAT1/2-Luciferase reporter cloning	HindIII overhang lower case
RUNX2-FWD	tcgaTCACCAACCACAGCAATCACCAACCACAGCAATCACCAACCACAGCA	RUNX2-Luciferase reporter cloning	XhoI overhang lower case
RUNX2-REV	agctTGCTGTGGTTGGTGATTGCTGTGGTTGGTGATTGCTGTGGTTGGTGA	RUNX2-Luciferase reporter cloning	HindIII overhang lower case
NFkB-FWD	tcgaGGGACTTTCCGGGACTTTCCGGGACTTTCCA	NFkB-Luciferase reporter cloning	XhoI overhang lower case
NFkB_REV	agctTGGAAAGTCCCGGAAAGTCCCGGAAAGTCCC	NFkB-Luciferase reporter cloning	HindIII overhang lower case
CREB-FWD	tcgaGTGACGTCATGACGTCATGACGTCA	CREB-Luciferase reporter cloning	XhoI overhang lower case
CREB_REV	agctTGACGTCATGACGTCATGACGTCAC	CREB-Luciferase reporter cloning	HindIII overhang lower case
Dlx_FWD	tcgagTAATTATAGGTTTAATTATAGGTTTAATTATAGGTTTAATTATAGGTTTAATTATAGGTTTAATTATAGGTT	DLX-Sp7-Luciferase reporter cloning	XhoI overhang lower case
Dlx_REV	agcttAACCTATAATTAAACCTATAATTAAACCTATAATTAAACCTATAATTAAACCTATAATTAAACCTATAATTAc	DLX-SP7-Luciferase reporter cloning	HindIII overhang lower case
caCnA_FWD	TGCCACCATGTCCGAGCCCAAGGCGATTG	Constitutively active form of CnA	Kozak consensus underlined
caCnA_REV	TGTAAGCTTAGTTTCTGATGACTTCCTTCCG	Constitutively active form of CnA	HindII-underlined
