# Supplementary material for: The Osteogenesis Imperfecta Type V Mutant BRIL/IFITM5 Promotes Transcriptional Activation of MEF2, NFATc, and NR4A in Osteoblasts
Source: Int J Mol Sci. 2022 Feb 15;23(4):2148. doi: 10.3390/ijms23042148 (PMC8875491; doi:10.3390/ijms23042148)
Supplement: Supplementary file 1 [file ijms-23-02148-s001.zip › Supplemental Table S4_List of mouse Taman probes.xlsx]

## Sheet: Sheet1
Supplemental Table S4: List of mouse taqman probes
Gene symbol	Gene name	Taqman ID
Actb	β-actin	4352933-0808024
Mef2a	myocyte enhancer factor 2A	Mm01318991_m1
Mef2b	myocyte enhancer factor 2B	Mm00484956_g1
Mef2c	myocyte enhancer factor 2C	Mm01340842_m1
Mef2d	myocyte enhancer factor 2D	Mm00504931_m1
Hdac1	histone deacetylase 1	Mm02745760_g1
Hdac2	histone deacetylase 2	Mm00515108_m1
Hdac3	histone deacetylase 3	Mm 00515916_m1
Hdac4	histone deacetylase 4	Mm01304741_m1
Hdac5	histone deacetylase 5	Mm01246076_m1
Hdac7	histone deacetylase 7	Mm00469527_m1
Hdac8	histone deacetylase 8	Mm01224980_m1
Hdac9	histone deacetylase 9	Mm01293999_m1
Nfatc1	nuclear factor of activated T cells 1	Mm00479445_m1
Nfatc2	nuclear factor of activated T cells 2	Mm01240677_m1
Nfatc3	nuclear factor of activated T cells 3	Mm01249200_m1
Bril	bone-restricted Ifitm-like (Ifitm5)	Mm00804741_g1
Nr4a3	nuclear receptor subfamily 4 group A member 3	Mm00450071_g1
Nr4a2	nuclear receptor subfamily 4 group A member 2	Mm00443060_m1
Nr4a1	nuclear receptor subfamily 4 group A member 1	Mm01300401_m1
Ptgs2	prostaglandin-endoperoxide synthase 2	Mm00478374_m1
Msmp	Microseminoprotein prostate-specific	Mm01615101_g1
Inhba	Inhibin beta a	Mm00434339_m1
