# Supplementary material for: The Osteogenesis Imperfecta Type V Mutant BRIL/IFITM5 Promotes Transcriptional Activation of MEF2, NFATc, and NR4A in Osteoblasts
Source: Int J Mol Sci. 2022 Feb 15;23(4):2148. doi: 10.3390/ijms23042148 (PMC8875491; doi:10.3390/ijms23042148)
Supplement: Supplementary file 1 [file ijms-23-02148-s001.zip › Supplemental Table S5_Y2H_data.xlsx]

## Sheet: New_Report_Adj_Average
		WT-BRIL					MALEP-BRIL					negative CTL		empty bait		total library read counts				WT-BRIL						MALEP-BRIL					empty bait plasmid						unrelated negative bait controls
ID	Gene.Name	Tier.WT-BRIL	Adj.ave.WT-BRIL	N.adj.WT-BRIL	FC.WT-BRIL_vs_Pool CTL	Pvalue.WT-BRIL_vs_PoolCTL	Tier.MALEP-BRIL	Adj.ave.MALEP-BRIL	N.adj.MALEP-BRIL	FC.MALEP-BRIL_vs_PoolCTL	Pvalue.MALEP-BRIL_vs_PoolCTL	Adj.ave.	N.adj.	Adj.ave	N.adj	Pool.Average	Pool.1	Pool.2	Pool.3	replicate 1	replicate 2	replicate 3	replicate 4	replicate 5	replicate 6	replicate 1	replicate 2	replicate 3	replicate 4	replicate 5	replicate 1	replicate 2	replicate 3	replicate 4	replicate 5	replicate 6	Sample_6_1	Sample_6_2	Sample_6_3	Sample_7_1	Sample_7_2	Sample_7_3	Description	EntrezGene.ID	Gene.Biotype
ENSG00000164037	SLC9B1	Tier1	656.8	6	2.56851	0.0992596	Tier1	439.4	5	1.7	0.0996004	218.6	5		0	255.668	264.4	289.8	212.8	782.3	1534.6	531.4	607.9	367.6	116.8	266.8	255.6	670.3	610.1	394.5	3.8	1	3.1	0	1.1	0.1	26.8	157.5	124.8	115	296.7	399	solute carrier family 9, subfamily B (NHA1, cation proton antiporter 1), member 1	150159	protein_coding
ENSG00000135018	UBQLN1	Tier1	285380	6	1845.9	0.0620765	Tier1	294889	5	1907.4	0.147186		0		0	154.552	121.4	177.5	164.7	52177.3	6944.3	92468.8	580936	696894	282860	38932.6	696953	40972.9	877.2	696708	0.3	1.4	0.1	5.9	0.1	0.2	0.8	0.3	2.5	3.9	3	4.6	ubiquilin 1	29979	protein_coding
ENSG00000152944	MED21	Tier1	196851	6	2235.75	0.0867562	Tier1	278880	5	3167.4	0.120934	32.1	1		0	87.9969	108	91.8	64.1	144497	476310	487285	8975.9	63254.8	782	613.4	228721	102980	818054	244033	0.1	0.6	0.5	0.6	0	0	11.2	2.5	9.6	10.2	32.1	1.9	mediator complex subunit 21	9412	protein_coding
ENSG00000104112	SCG3	Tier1	409151	6	2375.46	0.002574	Tier1	362841	5	2106.6	0.158813	118.6	2		0	172.191	224.7	170.9	120.9	511318	412592	289710	313413	216937	710935	926756	43804	822678	3248.3	17717.6	0.2	0.9	0	0.2	0.4	0.2	6.8	11.9	181.1	29	42.7	56	secretogranin III	29106	protein_coding
ENSG00000188021	UBQLN2	Tier1	83.3	6	37.6957	0.0800641	Tier1	116.1	4	52.6	0.156142		0		0	2.16018	1.4	2.6	2.4	12.4	2.7	20.6	143.6	231.7	88.7	15.6	254.1	13.5	0.5	181.4	0	0	0	0	0	0	0	0.3	0.4	0	0	0	ubiquilin 2	29978	protein_coding
ENSG00000124635	HIST1H2BJ	Tier1	68.9	3	11.0633	0.207519	Tier1	144.5	2	23.2	0.12551	7.7	3		0	6.18672	3.9	7.4	7.3	92	0	113.1	0	1.7	0	172.2	116.7	0.2	0.3	0.3	0.5	0	0	0	0.1	0	3	5.8	0.2	14.3	0	0	histone cluster 1, H2bj	8970	protein_coding
ENSG00000111859	NEDD9	Tier1	2239.2	3	51.0929	0.228503	Tier2	140.6	3	3.2	0.494064		0		0	43.7761	29.5	41.8	60.1	4448.8	10.6	2254.6	2.3	1.6	14.1	2.3	6.9	373.9	20.1	27.8	1.7	0.1	0.2	0.3	0.1	0	0.5	0	0	1.2	1.2	1.2	neural precursor cell expressed, developmentally down-regulated 9	4739	protein_coding
ENSG00000070367	EXOC5	Tier1	34554.4	4	743.511	0.106804	Tier3	24.6	2	0.5	0.369991	28.4	3		0	46.4248	77.3	41.1	20.9	22801.5	31.7	70825.7	44558.8	8	5.2	37.1	9.6	7.8	12.1	10.9	0	0	0	0	0.1	0	3.8	0	36.7	0	32.1	16.6	exocyst complex component 5	10640	protein_coding
ENSG00000117569	PTBP2	Tier1	53.3	3	3.37856	0.0330768	Tier3	297.9	1	18.9			0		0	15.7344	27.9	12.8	6.5	0.6	35.1	0	63.3	61.5	0.1	297.9	0.2	0.1	0	0	0.1	0	0	0	0	0	1.2	1.5	0.2	1.5	0	1.2	polypyrimidine tract binding protein 2	58155	protein_coding
ENSG00000164038	SLC9B2	Tier1	174.8	3	4.43149	0.141142			0			72.7	3		0	39.4124	37.6	38.2	42.4	200.1	0.5	65.7	0.1	258.7	0.2	1	1.2	0.5	0.9	0.4	0	0.6	0	0	0	0	107.3	6.6	20.2	0.9	0.9	90.6	solute carrier family 9, subfamily B (NHA2, cation proton antiporter 2), member 2	133308	protein_coding
ENSG00000164615	CAMLG	Tier2	10015.8	5	38.53	0.288567	Tier1	35763.7	5	137.6	0.229487	468.7	2		0	259.898	220.7	279.3	279.7	7078.7	90.8	67.2	41509.1	38.9	1332.9	19437.7	3584.9	11906.5	135464	8426	0.7	0.6	3.2	0.2	0.4	0.3	145.3	792	59	4.5	1.8	2.2	calcium modulating ligand	819	protein_coding
ENSG00000088766	CRLS1	Tier2	723.2	4	2.6634	0.256	Tier1	3706.4	3	13.6	0.224946	212.9	2		0	271.51	286.2	234	294.3	1193.1	9.8	1356.3	9.1	269.3	74.2	9.8	33.6	2850.9	7483	785.2	1	0.3	0.8	0	0.6	0	347.5	78.4	3.2	12.6	0.9	3.8	cardiolipin synthase 1	54675	protein_coding
ENSG00000206013	IFITM5	Tier2	1.4	6	29.3785	1.85621e-05	Tier2	1.5	2	31.3	0.148684		0		0	0	0	0	0	1	1.7	1.5	1.4	1.5	1.4	0.8	1.2	0	1.9	0.6	0	0	0	0	0	0	0	0	0	0	0	0	interferon induced transmembrane protein 5	387733	protein_coding
ENSG00000132716	DCAF8	Tier2	149.4	3	43.554	0.345452	Tier2	7.5	4	2.2	0.249092		0		0	3.38071	2.2	5.5	2.4	0	0.4	0.2	385.6	59.8	2.8	14.8	1.5	0	8.9	4.9	0	0	0.2	0	0	0	0	0.3	0.7	0.6	0.6	0	DDB1 and CUL4 associated factor 8	50717	protein_coding
ENSG00000183704	SLC9B1P1	Tier2	6.3	5	5.72418	0.0307287	Tier3	3.3	5	3	0.0423124	3.9	3		0	1.05099	1	2.1	0	5.3	12.6	4.9	5.1	3.3	0.7	1.9	3	4.3	4.4	2.8	0	0	0	0	0	0	0.5	0	1.8	0.9	4.8	5	solute carrier family 9, subfamily B (NHA1, cation proton antiporter 1), member 1 pseudogene 1	NA	protein_coding
ENSG00000177879	AP3S1	Tier2	155.6	4	0.822504	0.340973	Tier3	555	2	2.9	0.587617	54	1		0	189.204	160.7	169.9	237	3.1	9.5	196.5	150.5	173.8	101.6	1.2	71.4	1.7	1038.6	3	0.3	0.1	1.6	0.1	0.4	0.2	19.8	40.1	54	7.5	12.1	4.1	adaptor-related protein complex 3, sigma 1 subunit	1176	protein_coding
ENSG00000172986	GXYLT2	Tier2	181.4	3	3.84467	0.403676	Tier3	84	2	1.8	0.667248		0		0	47.138	44.5	44.1	52.7	13.5	0.3	0.3	432.2	1.1	98.4	148	0.2	20	1.2	3.8	0.2	0.1	1.6	0	0.1	0	0	0	0.4	4.8	0	0	glucoside xylosyltransferase 2	727936	protein_coding
ENSG00000174173	TRMT10C	Tier2	15713.5	2	30.5477	0.480147	Tier3	1363.3	1	2.7			0		0	514.345	461.3	475.4	606.4	29993.2	10.8	1433.9	7.2	4.8	5.6	9.5	18.3	1363.3	13.1	7.5	4.4	1.6	2.5	0.2	2.3	0.4	2.3	4.8	5.7	21.5	4.5	5.3	tRNA methyltransferase 10 homolog C (S. cerevisiae)	54931	protein_coding
ENSG00000178966	RMI1	Tier2	3210.3	2	151.902	0.473639	Tier3	45.7	1	2.2			0		0	21.0845	23	27.8	12.5	274.8	1.2	0.6	0.5	6145.8	0.2	45.7	3.5	0.3	0.3	1.1	0.5	0.1	0	0	0.4	0	1.2	2.3	0.7	1.2	0	0.2	RecQ mediated genome instability 1	80010	protein_coding
ENSG00000138663	COPS4	Tier2	82797.3	3	109.229	0.300904			0			501.1	2		0	757.966	825.5	767.8	680.6	198358	55.6	48371.7	29.1	1662.6	21.4	45.3	56.9	32.5	45.3	38.8	1.3	2.3	3.3	0.6	2	0.4	668.6	115.1	333.6	23.9	4.5	15.1	COP9 signalosome subunit 4	51138	protein_coding
ENSG00000136160	EDNRB	Tier2	2088	2	10.2406	0.296691		178.9	2	0.9	0.50715	202.6	1		0	203.846	238.8	184.4	188.4	3036	5.9	1.4	24.3	1139.9	3.9	7.7	204.4	0.9	153.4	3.1	0.8	0	6.6	0.1	0.4	0	27.8	202.6	18.4	5.1	2.7	4.3	endothelin receptor type B	1910	protein_coding
ENSG00000148690	FRA10AC1	Tier2	90.2	2	2.07235	0.320643		32.3	1	0.7		64.9	2		0	43.5008	45.4	29.4	55.7	117.4	1.8	63	0.9	0.4	0.2	0.4	32.3	1.2	2.4	1.2	0.1	0	0.7	0	0.8	0.1	1.7	117.7	12	5.7	5.8	3.6	fragile site, folic acid type, rare, fra(10)(q23.3) or fra(10)(q24.2) candidate 1	118924	protein_coding
ENSG00000166946	CCNDBP1	Tier2	1721.2	2	8.32136	0.274877			0			438.8	2		0	206.795	200.3	220	200	2419	11.6	1.2	1023.3	2.6	0.5	4.1	18.1	1	4.1	6.3	0.5	0	0.4	0.1	0.8	0.2	704.3	0.8	173.2	11.7	1.8	9.9	cyclin D-type binding-protein 1	23582	protein_coding
ENSG00000182718	ANXA2	Tier3	420.7	2	2.43665	0.488792	Tier1	860.2	2	5	0.134157	593.2	2		0	172.605	134	194.6	189.2	0.3	660.7	180.6	1.2	1.9	12.8	707.7	9.7	1012.8	4.6	2.3	0.7	0.3	0.4	0	1.3	0	1137.7	4.6	25	48.7	15.1	3.8	annexin A2	302	protein_coding
ENSG00000166260	COX11	Tier3	88.6	1	1.20226		Tier2	185.1	2	2.5	0.271279	126.4	5		0	73.6514	68.3	64.6	88.1	9.2	0.9	0	88.6	1.4	0.3	0.5	133.4	2.1	1.4	236.8	0.3	0.1	1.6	0.3	0.7	0.2	135.9	41.1	341.4	45.7	2.7	67.8	cytochrome c oxidase assembly homolog 11 (yeast)	1353	protein_coding
ENSG00000198161	PPIAL4C	Tier3	14.7	3	5.01592	0.10911	Tier3	15.6	2	5.3	0.533026	147.2	6		0	2.88468	2.6	1.7	4.3	6.4	0.1	21	0.2	16.6	0	0.3	1.5	0	29.7	0.4	0	0	0	0	0.1	0	244.5	13.2	578.7	20.6	11.8	14.7	peptidylprolyl isomerase A (cyclophilin A)-like 4C	164022	protein_coding
ENSG00000196262	PPIA	Tier3	72.5	3	2.14326	0.229131	Tier3	97.6	2	2.9	0.601309	1640.6	6		0	33.8198	26.8	30.9	43.8	35.1	0.1	114	1.1	68.5	0.3	0.7	9.4	0.8	185.8	0.9	0.7	0.1	0	0.1	0	0	2825.1	144	6425.5	192.7	71.1	185.1	peptidylprolyl isomerase A (cyclophilin A)	5478	protein_coding
ENSG00000038274	MAT2B	Tier3	107.2	2	0.730403	0.224429	Tier3	498.8	2	3.4	0.575428	115.7	4		0	146.835	140.9	145.7	153.8	91.6	122.9	1.2	32.7	0.7	1.6	3.5	2.3	945.8	4.3	51.7	0.1	0.6	1.5	0.2	0	0.2	191.6	12.2	176.7	42.4	52.1	31.7	methionine adenosyltransferase II, beta	27430	protein_coding
ENSG00000164893	SLC7A13	Tier3	101.5	2	2.9861	0.568722	Tier3	32.8	2	1	0.922685	1081.7	6		0	33.954	24	36.6	41.3	17.5	0.1	2.1	0.7	185.5	0	0.1	0.3	24.1	2.7	41.5	0.6	0.6	0	0	0.1	0.1	2115.5	1014.9	574.6	395.6	1190.6	1198.7	solute carrier family 7 (anionic amino acid transporter), member 13	157724	protein_coding
ENSG00000169231	THBS3	Tier3	1720.9	1	87.7861		Tier3	3616.4	1	184.5		24.3	4		0	19.5545	15.1	21.6	22	1720.9	3.7	1.8	2.1	2.5	1.4	1.9	4.6	1.8	3616.4	1.1	0.1	0	0.3	0.1	0.1	0	15.5	0.3	5.5	3.3	17.9	58.4	thrombospondin 3	7059	protein_coding
ENSG00000236334	PPIAL4G	Tier3	1.3	2	1.59054	0.201794		2	1	2.4		16.9	2		0	0.814597	0.6	0.5	1.4	0.2	0	1.4	0	1.3	0	0	0.7	0	2	0	0	0	0	0	0.1	0	8.9	0.5	24.8	0.6	0.9	0.7	peptidylprolyl isomerase A (cyclophilin A)-like 4G	644591	protein_coding
ENSG00000114956	DGUOK	Tier3	981.7	2	7.75778	0.515682		82.8	1	0.7		534.5	6		0	126.5	94.6	124.8	160.1	83.2	1880.2	0.6	1.3	0.5	0.9	0.8	82.8	0	3.2	0.1	0.6	0.3	1.9	0	0.3	0	403.5	80.1	133.7	63.4	306.7	2219.5	deoxyguanosine kinase	1716	protein_coding
ENSG00000196504	PRPF40A	Tier3	4534.2	2	34.9732	0.50569			0				0		0	129.599	130.2	107.5	151.1	9018.2	11.5	2	3.2	50.1	2.1	5.1	28.5	1.4	2.4	5.2	0.8	1	1	0.3	1.6	0.1	12.2	25.1	20.7	16.1	1.8	3.1	PRP40 pre-mRNA processing factor 40 homolog A (S. cerevisiae)	55660	protein_coding
ENSG00000121022	COPS5	Tier3	2136	2	0.578495	0.4138			0			2811.2	5	770707	6	3692.41	5758.3	2778.5	2540.4	941	3331	4.4	14.8	7.3	113.3	9.6	53.4	17.6	14.8	12	915963	225876	976414	578149	958956	968885	936.4	1194.5	337.5	2436.4	7957.1	1531.8	COP9 signalosome subunit 5	10987	protein_coding
ENSG00000198695	MT-ND6	Tier3	15.6	2	2.31545	0.583749			0			6.1	4		0	6.70501	5.7	9.3	5.2	4	27.2	0	0.3	0.4	0	0.1	0	0.2	0	0.6	0	0.1	0.3	0	0.1	0	5.1	6.8	5.3	7.2	0.6	0.5	mitochondrially encoded NADH dehydrogenase 6	4541	protein_coding
ENSG00000117523	PRRC2C	Tier3	867.1	1	2.86751			119.1	1	0.4			0		0	302.34	277.4	287.4	342.2	867.1	4.4	4	59.5	2.1	60.1	6.8	11	119.1	5.1	2.6	1	0.7	2.5	0.4	0.9	0.2	64.6	4.8	3	16.4	15.4	3.1	proline-rich coiled-coil 2C	23215	protein_coding
ENSG00000114098	ARMC8	Tier3	750	1	2.48251			120.1	1	0.4		279.8	2		0	302.099	315.9	334.4	256	4.5	1.3	0.9	3.5	750	0.3	5.2	7.7	10.7	120.1	5.6	0.9	0.7	1.4	1.3	0.7	0.4	458.9	6.6	19.3	24.8	60.8	100.7	armadillo repeat containing 8	25852	protein_coding
ENSG00000080371	RAB21	Tier3	12.7	1	4.65463			1.6	1	0.6		155.2	5		0	2.67907	2.4	4.5	1.1	0.2	0.1	12.7	0.1	0	0	0	0	0	0.5	1.6	0	0	0	0	0	0	9.9	1	761.4	0.9	1.8	1.9	RAB21, member RAS oncogene family	23011	protein_coding
ENSG00000222036	POTEG	Tier3	14.7	1	4.87725			1.3	1	0.4			0		0	2.9745	3.3	2.1	3.5	0	14.7	0	0	0	0	0	0	1.3	0	0	0	0	0	0	0	0	0	0	0	0	0	0	POTE ankyrin domain family, member G	404785	protein_coding
ENSG00000134255	CEPT1	Tier3	964.2	1	17.4113				0			22.1	1		0	55.3321	72	54.6	39.4	0.1	964.2	0.8	1.3	0.1	0.3	0.3	4.9	0.2	1.4	0.6	0	0.3	0.1	0	0	0	1.8	0	1.8	22.1	2.7	5	choline/ethanolamine phosphotransferase 1	10390	protein_coding
ENSG00000172139	SLC9C1	Tier3	253	1	7.12645				0			10	1		0	35.4609	48.8	24.7	32.9	0	253	0.2	0.5	0.1	0.9	0	0	1.5	0.3	0.1	0	0	0	0.2	0	0	2.3	6.8	6.2	1.2	10	0.2	solute carrier family 9, subfamily C (Na+-transporting carboxylic acid decarboxylase), member 1	285335	protein_coding
ENSG00000164106	SCRG1	Tier3	62.3	1	1.44911				0			52	2		0	42.9673	39.1	38.2	51.6	0.2	62.3	0	0.4	0.5	0	1.9	6.6	0.9	0.3	0.4	0.6	0	0.4	0	0.2	0	93.2	0.8	1.2	10.8	0	0	stimulator of chondrogenesis 1	11341	protein_coding
ENSG00000205571	SMN2	Tier3	12.3	1	1.00601				0				0		0	12.1776	16.3	10.2	10.1	0	12.3	0	0	0.4	0	0	0	1.7	0.2	0	0	0	0.3	0	0	0	0.2	0	0	0.3	0.3	0	survival of motor neuron 2, centromeric	6606	protein_coding
ENSG00000164483	SAMD3	Tier3	241.3	1	2.27153				0				0		0	106.179	116.3	106.8	95.4	0.1	0.5	0.3	0	241.3	0.3	1.1	1.2	7.1	0.2	0.1	0.5	0	0.6	0	0	0.1	2.6	0	0.4	7.2	0	0	sterile alpha motif domain containing 3	154075	protein_coding
ENSG00000180190	TDRP	Tier3	14.3	1	3.52543				0				0		0	4.0133	6.5	3.1	2.4	0.2	0	0	14.3	0.1	0	0	0	0	0	0.2	0	0	0.1	0	0	0.1	0.3	0	0	0	0	0	testis development related protein	157695	protein_coding
ENSG00000104671	DCTN6	Tier3	1036.2	1	2.0755				0			8496.4	6		0	499.216	520.1	509.6	468	5.6	6.6	1.5	3.7	1036.2	1.8	6.8	11.7	10.4	4.4	7.4	3.8	1.3	5.1	0.6	3.1	0.4	17700.5	5909	5720.2	5433	11477.1	4738.3	dynactin 6	10671	protein_coding
ENSG00000104490	NCALD	Tier3	140.1	1	6.73946				0				0		0	20.7515	26	14.5	21.7	140.1	0.1	0.2	3	0	0	0.3	0.3	0.1	0	0.2	0	0	0.1	0	0.1	0	0	0	0	2.1	0	0.5	neurocalcin delta	83988	protein_coding
ENSG00000196139	AKR1C3	Tier3	1490.1	1	2.18567				0				0		0	681.752	507	633.7	904.5	1490.1	0.6	0.5	2.3	2	0	1.6	7.7	3.4	7.3	11.2	2.1	4.9	1.4	0.3	1.1	0.3	15.7	3	72.1	18.2	1.8	4.6	aldo-keto reductase family 1, member C3	8644	protein_coding
ENSG00000122359	ANXA11	Tier3	834.6	1	11.608				0			200	3		0	71.8554	52.1	75.7	87.8	0.1	1.4	834.6	0.7	0.1	0	1.3	1	0.8	0.3	0.7	0	0.6	0	0.1	0.4	0	517.5	25.4	0.5	6.9	57.2	7.9	annexin A11	311	protein_coding
ENSG00000102804	TSC22D1	Tier3	384.1	1	1.42831				0				0		0	268.935	314.2	276.5	216.1	2.2	2.5	0	1.4	384.1	2.2	3.6	9.7	3.2	3.7	4.9	1.4	0.3	1.2	0.2	1.4	0	7.8	1.5	1.6	7.8	7.3	6.2	TSC22 domain family, member 1	8848	protein_coding
ENSG00000165521	EML5	Tier3	836.2	1	29.9731				0			63.2	2		0	27.8489	37.2	23.5	22.8	0.3	836.2	1.2	0.9	0.2	0	0.4	0	0.3	0.7	0.3	0	0	0	0	0.3	0.2	4.1	0.8	0.5	0.3	106.3	20.2	echinoderm microtubule associated protein like 5	161436	protein_coding
ENSG00000100811	YY1	Tier3	905.5	1	6.58222				0				0		0	137.532	105.6	142.9	164.2	0.8	905.5	2.3	1.3	0.6	0.1	1.9	3	0.7	1.9	2.4	2	0.9	0.7	0	0.6	0.2	0.2	0.3	0	3	1.2	1	YY1 transcription factor	7528	protein_coding
ENSG00000132646	PCNA	Tier3	68873.9	1	315.74				0			4028.4	4		0	218.085	261.6	204.3	188.4	9.3	68873.9	11.1	41.5	6.9	5.7	10	28.7	9.7	14.8	8.7	0.3	0.4	0.1	0.1	0.3	0	3223.1	3333.1	9259	13.7	13.6	298.3	proliferating cell nuclear antigen	5111	protein_coding
ENSG00000183765	CHEK2	Tier3	3654.5	1	20.4875				0				0		0	178.327	166	154	215	0.9	0.6	0.8	0.5	3654.5	0.3	4	3.5	1.4	3.1	4.1	0.1	0.1	1.1	0	0.1	0.4	0.3	0	0.2	0.9	0.6	1.4	checkpoint kinase 2	11200	protein_coding
ENSG00000197763	TXNRD3			0			Tier1	704.8	2	4.8	0.198323		0		0	145.77	99.7	158.5	179.1	2.4	3	0.3	1.6	0.6	0.5	0.3	12.9	1	889.6	520	0.7	0	0.2	0.1	1.4	0.1	1.5	1	0.5	11.7	1.2	17.1	thioredoxin reductase 3	114112	protein_coding
ENSG00000169902	TPST1		131.1	4	0.898184	0.86769	Tier2	721.3	3	4.9	0.474673		0		0	145.971	157.4	166.6	113.9	65.9	5.9	373.2	39.8	45.5	2	2	64.5	60.3	2039	4.4	0.7	0.7	0.5	0	0	0.3	22.1	0	0.2	14	14.8	27.9	tyrosylprotein sulfotransferase 1	8460	protein_coding
ENSG00000136504	KAT7		24.4	2	0.873003	0.859112	Tier2	57.4	2	2	0.281263	9.6	1		0	27.9992	26	31.3	26.6	0	0.1	0.3	40.3	0.1	8.6	0.1	0.3	71.5	43.3	5.4	0.1	0	0.2	0	0.1	0	0	0	2.3	9.6	0	1.4	K(lysine) acetyltransferase 7	11143	protein_coding
ENSG00000103995	CEP152		71.8	1	0.525168		Tier2	1671.7	2	12.2	0.452479		0		0	136.819	119.6	143.8	147	71.8	1.2	2.1	0.3	1.1	0.3	0.5	2.8	4.6	350.4	2993	0.3	0.4	0.2	0	0	0	1.5	0.8	3.5	3.3	0.9	0	centrosomal protein 152kDa	22995	protein_coding
ENSG00000186973	FAM183A			0			Tier2	2.6	2	0.5	0.250652		0		0	5.10222	2.4	5	7.9	0	0	0	0.5	0	0	0	0	0.4	3.2	2	0	0	0	0	0	0	0.2	0	0.2	0	0	0	family with sequence similarity 183, member A	440585	protein_coding
ENSG00000140403	DNAJA4			0			Tier2	1.6	2	2.6	0.235396		0		0	0.599893	0.2	0.2	1.4	0.1	0	0	0	0	0	0	2.1	0	0	1.1	0	0	0	0	0	0	0	0	0	0	0	0.2	DnaJ (Hsp40) homolog, subfamily A, member 4	55466	protein_coding
ENSG00000111679	PTPN6		5.5	3	1.18362	0.766432	Tier3	19.2	1	4.1		1.7	1		0	4.64779	2.2	7.4	4.3	0.7	0	2.1	9.7	0.6	4.7	0	0.8	19.2	0	0.1	0	0	0	0	0	0	0	0.3	0.2	0.3	0	1.7	protein tyrosine phosphatase, non-receptor type 6	5777	protein_coding
ENSG00000119048	UBE2B		29.3	2	0.415943	0.0626594	Tier3	134.6	2	1.9	0.00507248	2444.4	6		0	70.4009	61.6	72.4	77.2	0.6	3.5	37.2	21.3	2	0.6	1.5	5.1	129.6	139.6	4.7	0	0	0.3	0.1	0.4	0.1	3631.6	8557.1	232.7	38.8	2028.9	177.4	ubiquitin-conjugating enzyme E2B	7320	protein_coding
ENSG00000147488	ST18		1.7	2	0.402764	0.250931	Tier3	2399	2	554.9	0.500322		0		0	4.27316	7.5	2.8	2.4	1.2	0.8	2.1	0.5	0.5	0.5	0.7	0.8	1.8	0.9	4796.1	0	0	0	0	0	0	0.3	0	0.4	0.3	0.9	0.2	suppression of tumorigenicity 18 (breast carcinoma) (zinc finger protein)	9705	protein_coding
ENSG00000115091	ACTR3		63.7	1	0.265983		Tier3	341	2	1.4	0.752726	167.6	4		0	239.708	328.7	240.4	150	1.9	4	63.7	2.2	3.3	1.8	588.1	4.9	4.6	93.9	5.3	0.7	0.6	1.3	0	0.7	0.1	164.6	15	40.2	61.9	73.6	370.4	ARP3 actin-related protein 3 homolog (yeast)	10096	protein_coding
ENSG00000184007	PTP4A2		210.9	1	0.586438		Tier3	618	1	1.7			0		0	359.622	385.6	348.9	344.4	1.7	6.3	1.4	210.9	2.1	1.6	7.1	38.6	3.4	618	9.4	1.3	0.9	6.8	0.9	1	0.2	5.1	2.8	8	9.9	69.6	8.2	protein tyrosine phosphatase type IVA, member 2	8073	protein_coding
ENSG00000126953	TIMM8A		2.6	1	0.34997		Tier3	40.6	1	5.4		54.2	2		0	7.49792	6.3	8.3	7.9	0.1	0	2.6	0	0.1	0	0.1	0	0	40.6	0	0.1	0.1	0	0	0.2	0	0.8	105.5	2.8	1.2	0	0	translocase of inner mitochondrial membrane 8 homolog A (yeast)	1678	protein_coding
ENSG00000166685	COG1		78	1	0.468574		Tier3	237.6	1	1.4		69.7	2		0	166.475	124.9	192.7	181.8	11.7	3	7.8	0.2	78	0.6	2.4	2.6	1.3	237.6	1.3	0.2	1.3	0.1	0.3	0.2	0.4	48.9	90.5	4.1	12.3	2.1	7.5	component of oligomeric golgi complex 1	9382	protein_coding
ENSG00000162669	HFM1			0			Tier3	7.7	2	0.7	0.340646	207.5	5		0	10.7763	14.4	7.8	10.1	0.6	1.4	0	2.6	0	0	1.3	5.9	0	9.5	1.2	0.2	0	0.1	0	0	0	82	54	28	1.5	836.7	36.8	HFM1, ATP-dependent DNA helicase homolog (S. cerevisiae)	164045	protein_coding
ENSG00000204217	BMPR2			0			Tier3	99.9	2	1	0.894134		0		0	97.6449	73.8	113.9	105.2	1.4	0.3	2	1.8	0.4	0	1.4	1.5	0.4	109.4	90.4	2.5	0.3	0.1	0	0.3	0	0.7	0.3	10.1	2.4	0.6	0.7	bone morphogenetic protein receptor, type II (serine/threonine kinase)	659	protein_coding
ENSG00000118855	MFSD1			0			Tier3	542.7	2	2	0.361291	1123.4	1		0	276.569	304.1	252.8	272.9	1	9	8.4	1.6	12	14.1	1.4	13.4	713.3	2.6	372.1	1.6	0.3	0.3	0.5	0.6	0.3	17.2	47.9	5.1	51.4	1123.4	62.7	major facilitator superfamily domain containing 1	64747	protein_coding
ENSG00000146039	SLC17A4			0			Tier3	12.2	2	6.7	0.517995		0		0	1.77438	2.4	2.6	0.3	0.1	0	0	0.3	0	0	23.2	1.2	0.2	0	0	0	0	0	0	0	0	0.2	0	0	0	0	0	solute carrier family 17, member 4	10050	protein_coding
ENSG00000151150	ANK3			0			Tier3	717.7	2	2.2	0.628604		0		0	319.552	289.8	343	325.9	2	3.5	1.5	2.6	4.3	0.6	2	114.4	5.1	1321	4.8	0.6	2	3.4	0.6	0.4	0	4.3	43.1	11.2	6.6	0.6	8.7	ankyrin 3, node of Ranvier (ankyrin G)	288	protein_coding
ENSG00000132855	ANGPTL3			0			Tier3	416.7	1	3.8			0		0	110.059	141.4	52.9	135.9	0.7	0.5	0	1.8	0.5	0.7	0.9	1.8	0.7	0.5	416.7	0.8	0.1	0	0.1	0.1	0.1	2.3	0.5	0.4	21.8	0.6	14.2	angiopoietin-like 3	27329	protein_coding
ENSG00000138496	PARP9			0			Tier3	820.4	1	2.8		195.7	1		0	297.078	231.7	382.4	277.2	0.5	1.9	0	3.2	0.5	0.2	0	820.4	1.5	5.3	1.4	0.6	1.2	0.4	0.1	0.3	0.3	5.6	0	10.3	1.8	56.3	195.7	poly (ADP-ribose) polymerase family, member 9	83666	protein_coding
ENSG00000168827	GFM1			0			Tier3	5910.6	1	20.6		1227.2	4		0	286.598	335.4	291.2	233.2	30.8	2.8	2	10.8	2.1	0.5	8.9	5.1	9.2	3.9	5910.6	0.1	0	0.1	0.3	0.2	0.1	173.2	2371.5	357.3	2006.9	4.5	23.3	G elongation factor, mitochondrial 1	85476	protein_coding
ENSG00000090402	SI			0			Tier3	10.9	1	1.3			0		0	8.25249	10	10.4	4.3	0	0	0	0.7	1.3	0	1.5	10.9	0	0	0	0.1	0	0	0	0	0	0.2	0.5	0.2	0	0.3	0	sucrase-isomaltase (alpha-glucosidase)	6476	protein_coding
ENSG00000134852	CLOCK			0			Tier3	32.7	1	5.7		92.5	2		0	5.70228	2.8	4.7	9.5	0	0	0	0	0	0	0	0	0	32.7	0	0	0	0	0	0	0	6.1	0.3	178.8	0	0.3	1.2	clock circadian regulator	9575	protein_coding
ENSG00000109270	LAMTOR3			0			Tier3	474.9	1	1.6			0		0	298.584	329.1	292.2	274.5	0.9	3.6	0.8	1.5	2.1	0.3	474.9	7.1	4.9	2.9	3.4	1.3	0.7	1.1	0.2	0.6	0.1	9.3	1.3	1.1	11.4	6.7	21.6	late endosomal/lysosomal adaptor, MAPK and MTOR activator 3	8649	protein_coding
ENSG00000138660	AP1AR			0			Tier3	16.1	1	1			0		0	16.5035	13.4	13.5	22.6	0	0	0	0	0.8	0	0.8	0.8	16.1	0.2	0	0	0	0	0	0	0	0	0	0	0.3	0.3	0	adaptor-related protein complex 1 associated regulatory protein	55435	protein_coding
ENSG00000109756	RAPGEF2			0			Tier3	11.5	1	2.1			0		0	5.58511	4.7	8.5	3.5	0	0.1	0	0	0	0	0	11.5	0.1	0	0.7	0	0	0	0	0.1	0	0.8	0	0.2	0	0.3	0	Rap guanine nucleotide exchange factor (GEF) 2	9693	protein_coding
ENSG00000197860	SGTB			0			Tier3	1275.3	1	72.3			0		0	17.5836	12.6	8.1	32.1	0.3	0.4	0.2	0.1	0.1	0.3	1275.3	0.2	0.1	0	0.4	0.1	0	0	0	0	0	0	0	0	0	0	0	small glutamine-rich tetratricopeptide repeat (TPR)-containing, beta	54557	protein_coding
ENSG00000106013	ANKRD7			0			Tier3	3133.4	1	2.4		573.4	2		0	1314.82	1331.4	1195.7	1417.4	15.7	93.8	7.8	8.9	19.3	12.2	25.8	54.6	44.6	3133.4	32.6	3.8	3.5	5.4	0.5	4.7	0.3	391.3	302	114.4	243.5	755.6	281.9	ankyrin repeat domain 7	56311	protein_coding
ENSG00000267697	LUZP6			0			Tier3	172.6	1	2		60.1	4		0	84.3715	81.2	56.7	115.2	3.6	16.2	1.2	0.8	2.2	0.9	2.5	5.3	8.9	2.4	172.6	0.2	0.3	0.5	0	0.8	0.1	56	9.1	10.1	46	105.7	32.7	leucine zipper protein 6	767558	protein_coding
ENSG00000164924	YWHAZ			0			Tier3	25.8	1	2.2			0		0	11.8613	16.5	8.8	10.3	0.2	0.6	0	0	1.1	0.1	0.2	0.8	0.2	0.5	25.8	0	0	0	0	0.2	0	2	0.5	1.4	1.5	1.2	0	tyrosine 3-monooxygenase/tryptophan 5-monooxygenase activation protein, zeta	7534	protein_coding
ENSG00000119906	FAM178A			0			Tier3	22.4	1	2.1			0		0	10.5581	9.8	17.6	4.3	0	0	0	0	0	0	22.4	0	0	0.2	0	0	0	0	0	0	0	0.5	0	0	2.4	0.3	0	family with sequence similarity 178, member A	55719	protein_coding
ENSG00000170743	SYT9			0			Tier3	12.5	1	5.2		1.5	1		0	2.37394	2.2	3.8	1.1	0	0	0	0.1	0	0	0	12.5	0	0	0	0	0	0	0	0	0.1	0	0	0	0	1.5	0	synaptotagmin IX	143425	protein_coding
ENSG00000007372	PAX6			0			Tier3	46.4	1	4.5			0		0	10.3458	10.8	12.1	8.2	0	0	0	0.3	0	0	0.3	0.2	46.4	1	0.2	0	0	0	0	0	0	1.3	0.8	0.4	1.2	0.3	1.7	paired box 6	5080	protein_coding
ENSG00000165325	CCDC67			0			Tier3	830.1	1	9.4			0		0	88.6949	95.6	78.1	92.4	0.9	3.6	0.2	0.8	0.4	0.8	2.2	1.8	3.8	830.1	0.6	0.1	0.1	0.1	0	0.5	0.1	2.8	0.8	0.4	3.3	1.5	1.2	coiled-coil domain containing 67	159989	protein_coding
ENSG00000133703	KRAS			0			Tier3	14.1	1	1.1			0		0	12.4829	8.9	2.1	26.4	0	0	0	0	1.1	0	0	0	0.4	14.1	0	0	0	0	0	0	0	0	0.3	1.6	0	0	0	Kirsten rat sarcoma viral oncogene homolog	3845	protein_coding
ENSG00000139597	N4BP2L1			0			Tier3	18.5	1	1.1		237.2	5		0	17.002	23.8	18.5	8.7	0.5	1.3	0.8	0.1	0.2	0.3	1	3	18.5	0	2.2	0.1	0	0.2	0	0.1	0	49.8	1003.5	113	14	3.6	5.5	NEDD4 binding protein 2-like 1	90634	protein_coding
ENSG00000133112	TPT1			0			Tier3	566.5	1	4.8		1728.4	3		0	118.785	122.8	97.1	136.4	0.5	4.9	1.5	0.9	1.4	1.6	8	8.1	6	566.5	3.2	0.1	0.1	0.3	0.3	0.4	0.1	298.5	4772.6	114	18.8	5.4	14.2	tumor protein, translationally-controlled 1	7178	protein_coding
ENSG00000081014	AP4E1			0			Tier3	12.2	1	1.9			0		0	6.24167	10.2	2.8	5.7	0	0	0	0	0.3	0	0	12.2	0	0	0	0.1	0.1	0	0	0.4	0	0	0	0	0	0	0	adaptor-related protein complex 4, epsilon 1 subunit	23431	protein_coding
ENSG00000117899	MESDC2			0			Tier3	77.5	1	2.2		662.7	1		0	35.3762	28.1	38.9	39.1	2.8	0.1	0	0.2	0.1	0.1	0	3	0.2	77.5	0.2	0	0	0.1	0	0.3	0	662.7	0	1.1	2.7	0	1.4	mesoderm development candidate 2	23184	protein_coding
ENSG00000154945	ANKRD40			0			Tier3	61.5	1	4.2			0		0	14.589	14.4	13.3	16	0.1	0	0	0.1	0.1	0	0	0	0	0	61.5	0	0	0	0	0	0	0	0	0	0.3	0	0	ankyrin repeat domain 40	91369	protein_coding
ENSG00000141452	C18orf8			0			Tier3	165.8	1	1.9			0		0	85.3357	77.5	75.2	103.3	2.8	11.5	2.9	0.5	10	0	2.3	1.8	5.2	3.6	165.8	0.1	0.3	0.9	0	0.2	0	0.5	1.3	11.9	8.4	0.6	0	chromosome 18 open reading frame 8	29919	protein_coding
ENSG00000078142	PIK3C3			0			Tier3	572.6	1	2		123.4	1		0	280.187	342.3	269.1	229.1	0.2	1.9	2.1	1.1	0.1	0.5	2.7	0.7	572.6	0.2	2	0.6	0.4	0.9	0.2	0.4	0.2	49.9	3	123.4	3	0.6	49.3	phosphatidylinositol 3-kinase, catalytic subunit type 3	5289	protein_coding
ENSG00000081138	CDH7			0			Tier3	15.2	1	1.5			0		0	10.1057	12	14.2	4.1	0	0	0	0	0	0	1.1	0	0	0	15.2	0	0	0	0	0.1	0	0	0.3	0	0	0	0	cadherin 7, type 2	1005	protein_coding
ENSG00000153086	ACMSD		147.3	2	0.691954	0.51155		82.8	4	0.4	0.0793784		0		0	212.955	156	186.1	296.8	35.4	216.1	15.1	78.5	4	5.7	69.3	5.8	83.6	53.7	124.6	1	0.1	0.5	0.3	0.1	0.6	4.1	2	1.2	14.3	3.3	0.7	aminocarboxymuconate semialdehyde decarboxylase	130013	protein_coding
ENSG00000170917	NUDT6		43.9	2	0.773507	0.738598		20.2	2	0.4	0.00891166	267.6	2		0	56.7091	62.8	54.8	52.5	0.3	73.4	14.3	4.2	0.4	2.8	6.1	4.6	16.6	23.7	4.4	0	0.4	0.3	0	0.1	0	18.3	0	0.9	2.7	1.2	516.8	nudix (nucleoside diphosphate linked moiety X)-type motif 6	11162	protein_coding
ENSG00000145354	CISD2		10	2	0.718087	0.607096		3.7	1	0.3		8.3	3		0	13.966	15.7	12.1	14.1	4.4	15.6	3.4	3	0	0.3	0.5	0.5	0.8	3.7	0.4	0.1	0.1	0	0	0.1	0.2	0.2	0	3.7	3	8.8	12.5	CDGSH iron sulfur domain 2	493856	protein_coding
ENSG00000112531	QKI		24	2	0.363467	0.0207596			0			24.3	2		0	66.1372	53.1	73.6	71.8	1.8	25.1	1.7	22.9	1.9	0.6	12.1	2	1.8	3.7	2.8	0.6	0.4	0.1	0.1	0	0.2	7.1	21	5.3	4.2	27.5	4.1	QKI, KH domain containing, RNA binding	9444	protein_coding
ENSG00000110200	ANAPC15		8.1	1	0.482232			5.3	2	0.3	0.119994		0		0	16.9011	9.8	15.7	25.3	0	8.1	0	0.4	0.4	0.3	0	6.3	0.1	4.4	1.3	0.2	0	0	0	0	0	0.8	0	0.2	1.2	2.1	0	anaphase promoting complex subunit 15	25906	protein_coding
ENSG00000155380	SLC16A1		16	1	0.394638			13.4	1	0.3			0		0	40.597	35	47.9	38.9	0	16	0.2	0	0	0	13.4	0.5	0	0	0.2	0.1	0	0.2	0	0.3	0	0	0.3	0	0.9	0.3	1	solute carrier family 16 (monocarboxylate transporter), member 1	6566	protein_coding
ENSG00000120334	CENPL		4.5	1	1.30405			1.3	1	0.4		45.8	4		0	3.44951	3.7	2.6	4.1	0	4.5	0	0	0	0	0.1	0	0	0	1.3	0	0	0.1	0	0	0	159.5	7.6	1.4	0	14.8	0	centromere protein L	91687	protein_coding
ENSG00000268688	AC007382.1		3	1	1.54687			1.3	1	0.7			0		0	1.89977	2.8	0.9	1.9	0	3	0	0	0	0	0	1.3	0	0	0	0	0	0	0	0	0	0	0	0	0.3	0	0	Uncharacterized protein	NA	protein_coding
ENSG00000138777	PPA2		50.3	1	0.269574			121.3	1	0.7			0		0	186.611	178.4	165.7	215.8	50.3	1.4	0	4.4	10.2	2.1	3.2	39.4	121.3	1.4	6.9	0.1	0.1	0.8	0	1	0.1	0.7	1.8	3.5	14.6	2.1	3.1	pyrophosphatase (inorganic) 2	27068	protein_coding
ENSG00000113303	BTNL8		12.4	1	0.670064			8.7	1	0.5		12.4	3		0	18.5727	14.4	17.1	24.2	0	1.9	0	0.1	12.4	1	0	0.2	0.1	8.7	0	0	0	0	0	0	0	22	0.3	10.4	0	0	4.8	butyrophilin-like 8	79908	protein_coding
ENSG00000189369	GSPT2		159.4	1	0.482045			174.2	1	0.5			0		0	330.713	297.1	308.8	386.2	1.2	159.4	1.1	0.5	0.5	0.2	1.4	1.5	0.9	174.2	2.1	1.5	0.7	0.2	0.1	0.1	0	1.2	48.7	46.4	2.4	0.6	1.4	G1 to S phase transition 2	23708	protein_coding
ENSG00000205339	IPO7		1.2	1	0.32902			5.3	1	1.4			0		0	3.62949	5.3	2.6	3	0	1.2	0	0.1	0	0	0	5.3	0.1	0.3	0.1	0.1	0	0	0	0	0	0	0	0.2	0	0	0	importin 7	10527	protein_coding
ENSG00000173120	KDM2A		2.2	1	0.678766			1.2	1	0.4		2	3		0	3.31281	3.5	4	2.4	0	0	0	2.2	0	0	0	1	0	0.2	1.2	0	0	0	0	0	0	1.8	0	0.4	1.5	2.7	0	lysine (K)-specific demethylase 2A	22992	protein_coding
ENSG00000161921	CXCL16		1	1	0.481891			1.3	1	0.6		4.8	1		0	2.19463	1.4	1.9	3.3	0	1	0	0	0	0	0	1.3	0	0.5	0	0	0	0.3	0	0	0	0	0	0.2	0.9	0	4.8	chemokine (C-X-C motif) ligand 16	58191	protein_coding
ENSG00000153339	TRAPPC8		101.5	1	0.366489			108.4	1	0.4		840.7	6		0	277.169	385.6	279.8	166.1	1.5	2.5	0.6	101.5	3.1	0	9	21.3	13.5	108.4	5.2	1.5	0.9	1.6	0.5	1	0.1	129.3	92.1	261.4	156.9	3221.3	1183.3	trafficking protein particle complex 8	22878	protein_coding
ENSG00000116237	ICMT		1.1	1	0.417186				0				0		0	2.62337	1.4	4.3	2.2	0	0	0	0	1.1	0	0	0	0	0	0	0	0.1	0	0	0	0	0.2	0	0	0	0	0.2	isoprenylcysteine carboxyl methyltransferase	23463	protein_coding
ENSG00000162545	CAMK2N1		1	1	1.8607				0				0		0	0.531322	0.6	0.7	0.3	0	1	0	0	0	0	0	0	0	0.2	0.5	0	0	0	0	0	0	0	0	0	0	0.6	0	calcium/calmodulin-dependent protein kinase II inhibitor 1	55450	protein_coding
ENSG00000183726	TMEM50A		69.4	1	0.727335				0				0		0	95.4526	97	98	91.3	0.6	8.8	1.2	69.4	21.9	0.4	3.6	5.1	0.5	1.2	0	1.3	0.1	3.1	0	0.6	0.1	0	0.3	0.2	9	17	0.7	transmembrane protein 50A	23585	protein_coding
ENSG00000142937	RPS8		23.3	1	0.497318				0			983	4		0	46.9853	38.8	41.8	60.3	1.2	23.3	0	1.2	0.9	0.1	0.7	1.6	1.8	1.7	2.7	1.2	1	0.4	0	0.4	0.2	50.4	3611.8	107.3	6.6	162.3	7	ribosomal protein S8	6202	protein_coding
ENSG00000134716	CYP2J2		15.1	1	0.275253				0			290.3	1		0	54.9471	60	51	53.8	0.2	15.1	0	0.9	0	0	0.2	0.3	0.1	0	0	0.1	0.7	0.2	0.2	0	0	3.8	0	0	0	290.3	0.5	cytochrome P450, family 2, subfamily J, polypeptide 2	1573	protein_coding
ENSG00000184005	ST6GALNAC3		5.3	1	0.413766				0				0		0	12.8493	9.2	12.8	16.6	0	5.3	0	0.9	0	0.3	0	0.8	0.3	0.9	0	0	0	0.1	0	0	0	0	0	0.4	0	0	0	ST6 (alpha-N-acetyl-neuraminyl-2,3-beta-galactosyl-1,3)-N-acetylgalactosaminide alpha-2,6-sialyltransferase 3	256435	protein_coding
ENSG00000067208	EVI5		11.6	1	0.493365				0				0		0	23.576	20.7	30.1	19.8	1.8	11.6	0	0.1	0	0	5.2	0.2	1.4	0	0	0	0	0	0.2	0.1	0	0.7	0	0.5	1.8	0.3	0.2	ecotropic viral integration site 5	7813	protein_coding
ENSG00000197780	TAF13		1.8	1	0.604754				0				0		0	3.01805	3.5	4.5	1.1	0	1.8	0	0	0	0	0	0	0	0	0	0	0	0	0	0	0	0	0	0.5	0	0	0	TAF13 RNA polymerase II, TATA box binding protein (TBP)-associated factor, 18kDa	6884	protein_coding
ENSG00000031698	SARS		21.2	1	0.264718				0			326	1		0	80.1851	62.8	88.3	89.4	0.1	0.1	21.2	0	11.7	0	1.4	0.8	1.1	2.2	0.6	0.2	0	0.3	0.1	0.2	0	5.8	0.3	3	4.2	326	13.5	seryl-tRNA synthetase	6301	protein_coding
ENSG00000162775	RBM15		6.4	1	0.371593				0				0		0	17.4367	17.1	19.5	15.8	0	6.4	0	0.1	0	0	0	0.2	0	0.9	0.2	0	0	0	0.1	0	0	3.1	0	0	2.1	0.3	0.5	RNA binding motif protein 15	64783	protein_coding
ENSG00000134193	REG4		1.1	1	0.278525				0				0		0	4.0159	3.5	2.6	6	0	0	0.2	1.1	0	0	0	0	0	0	0	0	0	0	0	0	0.2	0	0	0.2	0	0.3	0.2	regenerating islet-derived family, member 4	83998	protein_coding
ENSG00000116539	ASH1L		59.8	1	0.320554				0				0		0	186.773	219.5	200.1	140.8	0	59.8	2	0.1	0.8	0.9	0	6.9	1.3	0.9	2.6	0.3	0.3	0.7	0.2	0.2	0.2	3	0.5	3.4	14.9	19.1	2.4	ash1 (absent, small, or homeotic)-like (Drosophila)	55870	protein_coding
ENSG00000117533	VAMP4		6.3	1	0.354772				0			164.3	2		0	17.9023	21.6	12.6	19.6	0	6.3	0	0.1	0.1	0.3	1.3	1.2	0	0.5	1.2	0.1	0	0.2	0	0	0	5.5	323.1	2.5	0.3	0.6	0	vesicle-associated membrane protein 4	8674	protein_coding
ENSG00000135870	RC3H1		4.3	1	0.282811				0				0		0	15.1744	15.7	17.1	12.8	0.6	4.3	0	0.3	0.1	0	0	0.8	0	0.5	1.1	0	0	0.3	0	0	0	0.3	0	0.9	0.6	0	0.7	ring finger and CCCH-type domains 1	149041	protein_coding
ENSG00000184774	RP11-480I12.4		1.5	1	0.326526				0				0		0	4.84242	3.1	3.3	8.2	0	1.5	0	0	0	0	0	0	0.2	0	0	0	0	0	0.1	0	0	0	0	0	0	0	0	Putative inactive alpha-1,3-mannosyl-glycoprotein 4-beta-N-acetylglucosaminyltransferase-like protein LOC641515	NA	protein_coding
ENSG00000162892	IL24		2.3	1	6.46496				0				0		0	0.316785	0.4	0	0.5	0	2.3	0	0	0	0	0	0	0	0	0	0	0	0	0	0	0	0.2	0	0	0	0	0	interleukin 24	11009	protein_coding
ENSG00000082512	TRAF5		48	1	0.572094				0				0		0	83.9744	79.3	76.7	95.9	0	0.6	48	0.1	0	0	0	0	0.1	3.7	0.7	0	0	0.1	0	0	0.1	0.5	0.8	0	0.3	0	0	TNF receptor-associated factor 5	7188	protein_coding
ENSG00000116903	EXOC8		3.4	1	1.16939				0				0		0	2.85999	3.7	3.6	1.4	0	3.4	0	0	0	0	0	0	0	0	0	0	0	0	0	0	0	0.2	0	0	0	0.3	0.2	exocyst complex component 8	149371	protein_coding
ENSG00000174371	EXO1		10.1	1	0.41422				0			42.9	3		0	24.3543	23.8	31.3	17.9	0	10.1	0	0.1	0	1.4	0	0	0.1	0	0	0	0	0	0	0.1	0	44.5	0	1.2	0.6	64.8	19.5	exonuclease 1	9156	protein_coding
ENSG00000171865	RNASEH1		2.6	1	0.741447				0			30.8	1		0	3.496	1.2	3.6	5.7	0	2.6	0	0	0.3	0.1	0	0	0	0.2	0	0	0.1	0	0	0	0	1	0	0	30.8	0	0	ribonuclease H1	246243	protein_coding
ENSG00000178295	GEN1		11.6	1	0.445315				0				0		0	26.1253	32.9	14.7	30.7	3.2	11.6	0.2	0.1	0.4	0	1.9	0	0	2	1.6	0.5	0	0	0	0.3	0.1	0.2	0	0.2	0.6	0.3	0	GEN1 Holliday junction 5' flap endonuclease	348654	protein_coding
ENSG00000171126	KCNG3		2.1	1	1.77345				0				0		0	1.14165	2.6	0.2	0.5	0.1	2.1	0	0	0	0	0	0	0	0	0	0	0	0	0	0	0	0.2	0.3	0.2	0.3	0	0.7	potassium voltage-gated channel, subfamily G, member 3	170850	protein_coding
ENSG00000239605	C2orf61		11.2	1	0.316548				0			1192	6		0	35.5509	29.5	47	30.2	0	11.2	0	0	0	0.1	0	0	0.5	0.9	0	0	0.3	0	0	0.1	0	1208.3	262.7	374.7	1782.8	792.5	2730.8	chromosome 2 open reading frame 61	285051	protein_coding
ENSG00000143942	CHAC2		2.7	1	0.930524				0				0		0	2.93045	2.4	1.2	5.2	2.7	0.5	0	0	0	0	0.2	0	0.1	0.2	0.2	0	0	0	0	0.2	0	0	0	0.4	0	0	0	ChaC, cation transport regulator homolog 2 (E. coli)	494143	protein_coding
ENSG00000119147	C2orf40		6.1	1	0.271468				0			25.3	4		0	22.4611	19.5	22.3	25.5	0.2	6.1	0	0.1	0.1	0.1	0	0.2	0.2	0	0.3	0	0.9	0.3	0.1	0.1	0	12.4	0.8	36.1	28.7	4.5	23.8	chromosome 2 open reading frame 40	84417	protein_coding
ENSG00000136546	SCN7A		17.7	1	0.363217				0				0		0	48.7288	51.9	61.7	32.6	0	17.7	0	0.3	0	0.1	0.5	0	3.5	0	1.1	0.6	0	0	0	0	0.4	1.8	0	0.9	0	0.3	0.7	sodium channel, voltage-gated, type VII, alpha subunit	6332	protein_coding
ENSG00000128694	OSGEPL1		19	1	0.28541				0				0		0	66.5451	72.8	68.1	58.7	0.3	19	0.2	0.3	0	0.2	0.7	1.5	0	1.2	2.5	0.1	0	0	0	0	0.4	0.5	0	0.4	1.8	0.3	0	O-sialoglycoprotein endopeptidase-like 1	64172	protein_coding
ENSG00000085449	WDFY1		2.6	1	0.267992				0				0		0	9.76062	6.7	11.2	11.4	0	2.6	0	0.1	0	0	0.2	0	0	0.2	0.1	0	0	0	0	0	0	0	0	0	0.6	0.3	1	WD repeat and FYVE domain containing 1	57590	protein_coding
ENSG00000115009	CCL20		34.4	1	0.377941				0				0		0	91.1863	80.7	94.7	98.1	0.8	34.4	0.6	0	1	0.2	0.1	0.7	1	2.2	1.8	0.3	0	1.9	0.1	0.6	0.1	6	0.5	0.4	1.2	0.6	0.2	chemokine (C-C motif) ligand 20	6364	protein_coding
ENSG00000134108	ARL8B		3.8	1	0.254054				0				0		0	15.0593	21.6	13.3	10.3	0	0	0.5	3.8	0	0.1	0.3	1.3	0.4	1.5	0.6	0	0	0	0	0	0	0.2	0	0	0	0	0	ADP-ribosylation factor-like 8B	55207	protein_coding
ENSG00000071282	LMCD1		1.3	1	1.14504				0				0		0	1.1199	1	0.7	1.6	0	1.3	0	0	0	0.1	0	0	0	0	0	0	0	0	0	0	0	0	0	0.4	0.3	0	0	LIM and cysteine-rich domains 1	29995	protein_coding
ENSG00000197548	ATG7		1.3	1	0.360637				0			1.5	1		0	3.66449	2.8	3.8	4.3	0.3	1.3	0	0.1	0	0	0	0	0	0	0	0	0	0	0	0.4	0	0.3	1.5	0	0	0	0.2	autophagy related 7	10533	protein_coding
ENSG00000144645	OSBPL10		14.2	1	0.71374				0				0		0	19.8948	14.6	21.1	23.9	0	14.2	0	0	0	0	0.1	0	0.2	0	0	0	0	1	0	0	0	0	0	0.2	0	0.6	1.2	oxysterol binding protein-like 10	114884	protein_coding
ENSG00000196345	ZKSCAN7		1.7	1	0.361467				0			31.4	5		0	4.72625	6.1	4.3	3.8	0	1.7	0.2	0	0.1	0	0	0	0.1	0.3	0	0	0	0	0	0	0	2	0	126.6	1.5	23	4.1	zinc finger with KRAB and SCAN domains 7	55888	protein_coding
ENSG00000186446	ZNF501		2.1	1	0.419719				0				0		0	4.98511	5.9	6.9	2.2	0	2.1	0	0	0	0	0	0.2	0	0	0	0	0	0	0	0.9	0	0	0	0	0	0.6	0	zinc finger protein 501	115560	protein_coding
ENSG00000083937	CHMP2B		12.9	1	0.255699				0				0		0	50.5793	60	45.8	45.9	0.8	12.9	0.2	2.8	2.8	1.6	0.8	4.5	0.1	5.5	1.4	0.7	0	0.2	0.1	1.2	0	0.5	0	3.7	2.4	0.9	2.6	charged multivesicular body protein 2B	25978	protein_coding
ENSG00000163751	CPA3		110.6	1	0.372664				0			550.5	4		0	296.991	339.2	309	242.7	5.7	110.6	0.6	1.4	3.8	0.5	8.7	0.7	7	3.4	3.8	1.6	0.9	1	0	1.7	0.1	109.3	2.3	132.6	41.8	885.2	1074.9	carboxypeptidase A3 (mast cell)	1359	protein_coding
ENSG00000169313	P2RY12		26.5	1	0.262356				0				0		0	101.225	110.8	87.1	105.7	1.1	0.3	0.3	26.5	0.1	0.4	0.3	0	1.7	2.4	0.9	0.2	0	0.1	0	0.4	0	0.3	0	0.2	1.2	0	0.2	purinergic receptor P2Y, G-protein coupled, 12	64805	protein_coding
ENSG00000132464	ENAM		1.6	1	1.96203				0				0		0	0.768553	2	0	0.3	0	0	0	1.6	0	0	0	0.2	0	0.2	0	0.1	0	0	0	0	0	0.3	0	0	0	0.9	0	enamelin	10117	protein_coding
ENSG00000163749	CCDC158		88.7	1	0.326251				0			166.3	1		0	272.051	288.2	285.5	242.4	0	88.7	0.2	4.5	1.6	1.6	2.3	5.8	1.7	0.5	2	0.6	0.1	0.2	0.2	0.3	0.3	166.3	0.3	0	2.1	0	1.7	coiled-coil domain containing 158	339965	protein_coding
ENSG00000156234	CXCL13		3.7	1	0.337638				0				0		0	11.1744	6.7	13.8	13	0	3.7	0	0	0	0	0.1	0	0.3	0	0	0	0	0	0	0	0	0	0	0	0	0	0	chemokine (C-X-C motif) ligand 13	10563	protein_coding
ENSG00000163297	ANTXR2		6.6	1	0.358533				0				0		0	18.4333	14	22.8	18.5	0.1	6.6	0	0	0	0	0	0.2	0.4	0	0.2	0	0	0.2	0	0	0	0	0	0	0	0	0	anthrax toxin receptor 2	118429	protein_coding
ENSG00000172955	ADH6		16	1	0.285566				0				0		0	56.1221	50.4	48.9	69	0.1	16	0.3	0	0.3	0	0	1.2	2.7	1.7	0.5	0.5	0	0	0	0.2	0	0.3	0.3	1.9	2.1	0.6	0.2	alcohol dehydrogenase 6 (class V)	130	protein_coding
ENSG00000168769	TET2		5.5	1	0.280862				0				0		0	19.8716	20.5	15.4	23.6	0	5.5	0	0	0.1	0	0	0.3	0	0.5	0	0	0	0	0	0.1	0.2	0.3	0	0	0.6	0.9	1	tet methylcytosine dioxygenase 2	54790	protein_coding
ENSG00000038295	TLL1		1.5	1	0.309401				0				0		0	5.11321	1.8	6.2	7.3	0	1.5	0	0	0	0	0.1	0	0	0	0	0	0	0	0	0.2	0	0.2	0.3	0	0.6	0	0	tolloid-like 1	7092	protein_coding
ENSG00000056050	C4orf27		23.5	1	0.262264				0			196.4	1		0	89.6323	112.1	80.5	76.4	1.2	23.5	2	1.4	0.3	0.3	0.3	3.3	0.7	1.2	1.1	0.2	0.3	0	0	0.4	0	196.4	1	5.7	7.8	7.3	12	chromosome 4 open reading frame 27	54969	protein_coding
ENSG00000134363	FST		4.5	1	1.51587				0				0		0	2.92857	3.3	3.1	2.4	0	0	0	4.5	0	0.5	0	0	0	0	0	0	0	0	0.1	0.3	0	0	0	0	0	0.3	0	follistatin	10468	protein_coding
ENSG00000164326	CARTPT		1.9	1	1.63315				0				0		0	1.16506	1.6	0.2	1.6	0	1.9	0	0	0	0	0	0.2	0	0	0	0	0	0	0	0	0	0	0	0	0	0	0	CART prepropeptide	9607	protein_coding
ENSG00000113319	RASGRF2		5.8	1	0.428695				0				0		0	13.6034	12.2	16.4	12.2	0	5.8	0	0	0	0	0	0.7	0.1	0.5	0.8	0.1	0.1	0	0	0	0	0	0	2.3	0	0	1	Ras protein-specific guanine nucleotide-releasing factor 2	5924	protein_coding
ENSG00000164334	FAM170A		2.9	1	0.33701				0				0		0	8.73044	7.7	9.5	9	0	0	0	2.9	0	0	0	0	0	0	0	0	0.3	0	0	0	0	0.2	0	0	0	0	0	family with sequence similarity 170, member A	340069	protein_coding
ENSG00000197536	C5orf56		3	1	1.11383				0			187.7	2		0	2.65782	1.4	3.6	3	0.2	3	0	0	0	0	0	0	0	0	0	0	0	0	0	0	0	6.8	0	0	0	368.7	0	chromosome 5 open reading frame 56	NA	protein_coding
ENSG00000113615	SEC24A		32.6	1	0.342245				0				0		0	95.4268	146.4	81.4	58.4	0	32.6	2	3.7	0.2	0	1	0.7	1	0	0.1	0	0	0.8	0	0.3	0	16.5	0.3	0.7	0	23	2.4	SEC24 family member A	10802	protein_coding
ENSG00000069018	TRPC7		1.4	1	0.356007				0				0		0	3.89112	2.2	4.3	5.2	0	0	0	1.4	0	0	0	0	0	0.3	0.1	0	0	0.6	0	0	0	0.2	0	0.2	0	0.3	0.2	transient receptor potential cation channel, subfamily C, member 7	57113	protein_coding
ENSG00000113211	PCDHB6		1.1	1	0.411107				0				0		0	2.66732	3.7	3.8	0.5	0	0	1.1	0	0	0	0	0	0	0	0	0	0	0.2	0.1	0	0	0.3	0	0.4	0.3	0.3	0.2	protocadherin beta 6	56130	protein_coding
ENSG00000235109	ZSCAN31		21.5	1	0.534404				0				0		0	40.3428	45.6	43.7	31.8	0	21.5	0	0	0	0	0.7	0.7	0.2	0.2	0.4	0	0	1	0	0	0	0.2	0.3	1.1	1.2	1.8	2.6	zinc finger and SCAN domain containing 31	64288	protein_coding
ENSG00000124614	RPS10		1.4	1	0.53396				0			5.7	4		0	2.57766	3.3	2.8	1.6	0	0.1	0	1.4	0	0	0.1	0	0	0.2	0.1	0	0	0	0	0	0	2.8	16	1.2	2.7	0.3	0	ribosomal protein S10	6204	protein_coding
ENSG00000124496	TRERF1		1.3	1	0.728443				0				0		0	1.78897	0	0.5	4.9	0	1.3	0	0	0	0	0	0	0.1	0	0	0	0	0	0	0	0	0	0.3	0.2	0	0.3	0	transcriptional regulating factor 1	55809	protein_coding
ENSG00000203907	OOEP		1.5	1	0.356348				0				0		0	4.43298	3.3	5.7	4.3	0.2	1.5	0	0	0	0	0	0	0	0.2	0	0	0	0	0	0	0	0.2	0	0	0	0	0	oocyte expressed protein	441161	protein_coding
ENSG00000111875	ASF1A		22.7	1	0.359526				0			101.5	3		0	63.2186	60.4	60.8	68.5	1.7	22.7	0.5	0.1	0.9	0.4	0.8	2.5	2	9.9	1.1	0.2	0.6	0.3	0	1.1	0	7.3	0.3	1.4	39.7	77.5	187.2	anti-silencing function 1A histone chaperone	25842	protein_coding
ENSG00000189007	ADAT2		1.7	1	0.458125				0			101.2	2		0	3.71854	6.5	3.6	1.1	0	1.7	0	0	0	0	0	0	0	0	0	0	0	0	0	0	0	3.8	0	198.5	0	0.3	0	adenosine deaminase, tRNA-specific 2	134637	protein_coding
ENSG00000131013	PPIL4		38	1	0.293623				0				0		0	129.683	148.9	113	127.2	0	38	0	0.1	0.7	0.3	0.8	2.1	1	1.9	2.7	0.1	0	0	0	0	0	2.6	0	0.4	2.4	28.8	17.8	peptidylprolyl isomerase (cyclophilin)-like 4	85313	protein_coding
ENSG00000171217	CLDN20		6.3	1	0.273538				0				0		0	23.2337	28.1	25.9	15.8	0	6.3	0	0.1	0	0	0	0.2	0	0	0	0	1.2	0	0	0	0	0.5	0	0.4	0	0	1.2	claudin 20	49861	protein_coding
ENSG00000146453	PNLDC1		2.7	1	0.253987				0				0		0	10.6683	8.7	6.4	16.9	0	0	0	0.3	0	2.7	0	0	0	0.3	0	0	0.1	0	0	0	0	0.2	0	0.2	0	0	0	poly(A)-specific ribonuclease (PARN)-like domain containing 1	154197	protein_coding
ENSG00000002746	HECW1		2.6	1	0.271356				0				0		0	9.63901	4.7	9	15.2	0	2.6	0	0.1	0	0	0	0.3	0	0	0.6	0	0	0	0.1	0	0	0.7	0.8	0.4	0.6	0	1	HECT, C2 and WW domain containing E3 ubiquitin protein ligase 1	23072	protein_coding
ENSG00000198039	ZNF273		1.5	1	0.375399				0			3.4	2		0	4.20547	5.9	4.3	2.4	0	1.5	0	0.1	0	0	0.1	0	0.2	0	0.8	0	0	0	0	0	0	1.5	0	5.3	0.3	0.6	0.2	zinc finger protein 273	10793	protein_coding
ENSG00000087087	SRRT		2	1	0.375777				0			3	1		0	5.48414	4.5	7.4	4.6	0	0	0	2	0	0	0	0	0	0.5	0	0	0	0.2	0	0	0	0.3	0	0.7	3	0.3	0	serrate RNA effector molecule homolog (Arabidopsis)	51593	protein_coding
ENSG00000105887	MTPN		5	1	0.467953				0			3.3	4		0	10.7553	10.6	9.7	12	0	0	0	5	0.2	0	0	1.2	0	0.2	0	0	0	0	0.2	0	0	3.6	0.8	3.4	2.1	2.7	3.6	myotrophin	136319	protein_coding
ENSG00000157800	SLC37A3		7.5	1	0.274311				0				0		0	27.4723	19.9	30.1	32.3	0.2	0.6	0	1.1	0.1	7.5	0.3	0	0.2	0.5	0	0.2	0	0.1	0	0.1	0.1	0.2	0	0	3	0	0	solute carrier family 37, member 3	84255	protein_coding
ENSG00000009335	UBE3C		7.6	1	0.924917				0				0		0	8.23025	12.4	7.1	5.2	0	7.6	0	0	0	0	0	0	0	0	0	0	0	0	0	0	0	0	0	0	0	0.3	0.2	ubiquitin protein ligase E3C	9690	protein_coding
ENSG00000174010	KLHL15		1.3	1	4.66205				0				0		0	0.237338	0	0.7	0	0	1.3	0	0	0	0	0	0	0	0	0	0	0	0	0	0	0	0.8	0	0	0	0	0	kelch-like family member 15	80311	protein_coding
ENSG00000102221	JADE3		4.6	1	0.661244				0				0		0	7.04648	5.1	7.4	8.7	0	4.6	0	0	0.3	0	0	0	0.1	0	0	0	0	0	0	0	0	0	0.5	0	0.6	0	0	jade family PHD finger 3	9767	protein_coding
ENSG00000147124	ZNF41		3.9	1	0.342311				0				0		0	11.3979	11.6	12.8	9.8	0.1	3.9	0.3	0	0	0	0	0.2	0	0	0	0.3	0	0	0	0	0	0.2	0	0.2	0	0.3	0	zinc finger protein 41	7592	protein_coding
ENSG00000197779	ZNF81		1.3	1	0.399757				0				0		0	3.30099	3.1	5.2	1.6	0	1.3	0	0	0	0	0	0	0	0	0	0	0	0.1	0	0	0	0	0	0.2	0.3	0	0.5	zinc finger protein 81	347344	protein_coding
ENSG00000234068	PAGE2		2.7	1	0.30782				0				0		0	8.91019	7.5	11.9	7.3	0.1	2.7	0	0	0	0	0.1	0.3	0.1	0.2	0	0	0	0	0	0.4	0	0	0	0.9	0	0	0	P antigen family, member 2 (prostate associated)	203569	protein_coding
ENSG00000000005	TNMD		1.1	1	0.547543				0				0		0	2.11374	0.8	5	0.5	1.1	0	0	0	0	0	0	0	0	0	0.5	0	0	0	0	0	0	0	0	0	0	0	0	tenomodulin	64102	protein_coding
ENSG00000184905	TCEAL2		21.2	1	0.444195				0				0		0	47.7079	43.9	39.4	59.8	0	0	0.3	0.4	21.2	0.2	0.1	2.3	0.2	0.7	0.2	0	0.3	0.1	0	0.1	0	1	0	0.5	1.2	0	1	transcription elongation factor A (SII)-like 2	140597	protein_coding
ENSG00000133142	TCEAL4		164.8	1	0.528742				0				0		0	311.662	296.9	313.5	324.5	0.6	3.1	1.8	3.2	164.8	4.3	2.6	26.7	3.9	5.8	4.3	0.8	1	1.6	0.3	2.1	0.3	4.8	4.8	2.3	14.6	3.6	2.9	transcription elongation factor A (SII)-like 4	79921	protein_coding
ENSG00000215114	UBXN2B		3.9	1	0.267504				0			189.6	2		0	14.5993	17.7	11.2	14.9	0	3.9	0.5	0.1	0	0	0	0	0	0.3	0.2	0	0	0.3	0.2	0	0.1	261.5	0.5	2.8	1.8	117.8	0.5	UBX domain protein 2B	137886	protein_coding
ENSG00000035681	NSMAF		40.2	1	0.322753				0			235.4	4		0	124.565	112.9	118.7	142.1	40.2	6.8	22.7	0.7	1.1	0.4	1.1	7.9	1.5	1	1.8	1	0	0.6	0	0.3	0	298.4	527.8	8	3	70.8	44.5	neutral sphingomyelinase (N-SMase) activation associated factor	8439	protein_coding
ENSG00000205189	ZBTB10		2.4	1	0.287379				0			50	1		0	8.52296	13	9	3.5	0	0	0.2	0	0.1	2.4	0	0	0.8	0.7	0	0	0	0	0	0	0	1	0.3	0	1.8	0.3	50	zinc finger and BTB domain containing 10	65986	protein_coding
ENSG00000183665	TRMT12		8.4	1	0.324094				0			259.9	5		0	25.9681	20.1	27.1	30.7	0	8.4	0	0.1	0	0.1	0	0.2	0	0	0	0	0.1	0	0	0.1	0	140.3	73.8	0	43.3	933.9	107.9	tRNA methyltransferase 12 homolog (S. cerevisiae)	55039	protein_coding
ENSG00000107020	PLGRKT		23.2	1	0.349881				0				0		0	66.4369	62.2	72.4	64.7	0	23.2	0.8	0.3	0.7	0	0.3	0.2	0.4	1.9	1.2	0.7	0	0.3	0.1	0	0	0.7	0.3	0.7	3.9	3.6	9.6	plasminogen receptor, C-terminal lysine transmembrane protein	55848	protein_coding
ENSG00000137076	TLN1		3.6	1	0.416042				0				0		0	8.68861	6.5	5.7	13.9	0.3	0	0	3.6	0	0	0	0.3	0	0.3	0.1	0	0.6	0	0.1	0.3	0	0.2	0.5	0.4	0.6	0	0.7	talin 1	7094	protein_coding
ENSG00000187742	SECISBP2		26.2	1	0.284247				0			442	1		0	92.224	106	106.6	64.1	0.3	26.2	0	0.1	0.1	0.1	0	0	12	1.2	0.7	0.1	0	0.3	0	0.7	0	12.6	0.3	442	4.8	15.7	6.7	SECIS binding protein 2	79048	protein_coding
ENSG00000158079	PTPDC1		5	1	1.10894				0				0		0	4.47808	2.2	7.1	4.1	0	0	0	0	5	0	0	0	0	0	0	0	0	0	0	0	0	0	0	0.5	0.3	0	0	protein tyrosine phosphatase domain containing 1	138639	protein_coding
ENSG00000136824	SMC2		99.3	1	0.648558				0				0		0	153.133	182	165.7	111.7	0	99.3	0.9	0.1	0.1	1	1.4	1.3	0.7	5.5	0.5	0.3	0.7	3.3	0.1	1.4	0	15	31.7	1.8	15.2	8.8	0.2	structural maintenance of chromosomes 2	10592	protein_coding
ENSG00000187134	AKR1C1		30.4	1	0.327832				0				0		0	92.8669	60.6	93.5	124.5	30.4	1.8	0	0.3	0.1	0.6	0.1	1.3	0.4	0.7	1.1	0.2	0.4	0.1	0.5	0.1	0	4.6	8.6	6.9	1.8	0.6	2.4	aldo-keto reductase family 1, member C1	1645	protein_coding
ENSG00000151632	AKR1C2		177.5	1	0.997564				0				0		0	177.907	121.8	171.4	240.5	177.5	1.9	0.2	0.1	0.4	0.3	0.5	0.5	1	0.9	2.2	0.7	0.3	0.1	0.2	0.3	0.1	12.1	8.4	25.1	6.9	1.8	1.9	aldo-keto reductase family 1, member C2	1646	protein_coding
ENSG00000198610	AKR1C4		5.6	1	0.352891				0				0		0	15.8479	13.8	11.2	22.6	5.6	0	0	0	0	0	0	0.2	0	0	0	0	0	0	0.1	0	0	0.2	0	0.2	0	0.3	0	aldo-keto reductase family 1, member C4	1109	protein_coding
ENSG00000213341	CHUK		21	1	0.356722				0				0		0	59.0163	60	62.4	54.6	0	21	0.3	0.1	0	0.3	0.3	0	0.3	1.5	1.3	0.5	0.1	0.3	0	0	0	0.7	0.3	5.5	5.4	0.6	10.8	conserved helix-loop-helix ubiquitous kinase	1147	protein_coding
ENSG00000165813	C10orf118		19.3	1	0.613825				0				0		0	31.5449	30.3	24.9	39.4	0	19.3	0.5	0.2	0.1	0	0.8	0.2	0.5	0	0.7	0.3	0.3	0	0	0.1	0	3.1	0.3	0	0	6.4	3.8	chromosome 10 open reading frame 118	55088	protein_coding
ENSG00000133794	ARNTL		9	1	0.374623				0				0		0	24.1799	21.2	24.2	27.2	0	9	0	0	0	0	0	0	0.7	3.7	0.2	0	0.1	0.3	0	0	0	0.3	0	0.2	0.9	3.6	0	aryl hydrocarbon receptor nuclear translocator-like	406	protein_coding
ENSG00000133818	RRAS2		5.8	1	0.387163				0				0		0	15.068	22.8	15.9	6.5	0.2	5.8	0	0.3	0	0.2	0.2	1	0	0	0	0	0	0.3	0	0.2	0	0.2	0.3	0	0	0	0	related RAS viral (r-ras) oncogene homolog 2	22800	protein_coding
ENSG00000255359	CCDC179		2.7	1	2.13192				0				0		0	1.24373	2.6	0	1.1	0	2.7	0	0	0	0	0	0	0.1	0.7	0	0	0	0.3	0	0	0	0	0	0	0	0	0	coiled-coil domain containing 179	100500938	protein_coding
ENSG00000182255	KCNA4		2.1	1	0.33119				0				0		0	6.43345	7.5	6.9	4.9	0	0	0	2.1	0	0	0	0.7	0.3	0	0	0	0	0	0	0	0	0	0.3	0	0.3	0	0	potassium voltage-gated channel, shaker-related subfamily, member 4	3739	protein_coding
ENSG00000197658	SLC22A24		9.8	1	0.318241				0				0		0	30.904	29.9	35.4	27.5	0	9.8	0.2	0.1	0.1	0.2	0	0	0.1	0	0	0	0	0.1	0	0.2	0	0	0	0	0	0	0	solute carrier family 22, member 24	283238	protein_coding
ENSG00000168066	SF1		5.5	1	4.60743				0			7.7	3		0	1.16439	0.8	2.1	0.5	0	5.5	0	0	0	0	0	0	0	0	0	0.1	0	0	0	0	0	0.5	0	8	10.5	4.5	0.5	splicing factor 1	7536	protein_coding
ENSG00000170647	TMEM133		3.2	1	0.29101				0			5.4	1		0	11.2003	21.2	9.7	2.7	0	3.2	0	0	0	0	0	0	0	1	0	0	0	0	0	0	0.1	0.2	0	0	0	5.4	0.2	transmembrane protein 133	83935	protein_coding
ENSG00000137674	MMP20		6.2	1	0.40641				0				0		0	15.304	16.5	8.8	20.7	0	6.2	0	0.5	0	0.1	0.1	2.1	0.3	0.2	0.4	0	0	0.2	0	0.1	0	0	0	0	0.3	0	0	matrix metallopeptidase 20	9313	protein_coding
ENSG00000204403	CASP12		4.9	1	0.279685				0			2166.8	4		0	17.65	18.9	20.2	13.9	0.2	4.9	0	0.3	1.1	0	0.3	0.3	0	0	0.5	0	0	0.1	0	0	0	8222.2	61.6	378.1	2.1	2.4	5.3	caspase 12 (gene/pseudogene)	100506742	protein_coding
ENSG00000259571	BLID		1.7	1	1.1887				0				0		0	1.4024	1.6	0.9	1.6	0.7	1.7	0	0	0	0.2	0	0	0	0.3	0	0	0	0	0	0	0	0	0	0.2	0.3	0	0	BH3-like motif containing, cell death inducer	414899	protein_coding
ENSG00000029153	ARNTL2		7.5	1	0.577067				0			8.7	1		0	13.0149	13.4	14.5	11.1	7.5	0	0	0	0	0	0	0	0	0	0	0	0	0	0	0	0	0.2	0	0	8.7	0	0	aryl hydrocarbon receptor nuclear translocator-like 2	56938	protein_coding
ENSG00000135677	GNS		9.3	1	0.437701				0			24.8	1		0	21.2774	23.2	27.1	13.6	0	9.3	0.8	0	0.1	0.1	0	0.7	0	0.2	0	0	0	0.1	0	0	0	0.7	0.5	0.4	1.5	0.6	24.8	glucosamine (N-acetyl)-6-sulfatase	2799	protein_coding
ENSG00000011465	DCN		137.8	1	0.975071				0			216.6	3		0	141.334	110.6	125.6	187.8	0	3.4	137.8	2.1	0.3	0	0.8	1.2	1.8	0.7	0.9	0.2	0.6	3.6	0.1	0.4	0.1	20.3	3.3	28.9	347.5	39.7	262.5	decorin	1634	protein_coding
ENSG00000257860	RP11-552I14.1		3.9	1	0.299403				0				0		0	13.0386	15.9	10.2	13	0.1	3.9	0.3	0	0	0.1	0.1	0.3	0	0.2	1	0	0	0.1	0	0	0	0	0	0	1.2	0	0	Uncharacterized protein	NA	protein_coding
ENSG00000171310	CHST11		1.1	1	0.669845				0			40.9	4		0	1.71868	1.4	2.4	1.4	1.1	0	0	0	0	0	0.2	0	0	0	0	0	0.1	0	0	0.1	0	12.1	1.3	147.7	0	0.9	2.4	carbohydrate (chondroitin 4) sulfotransferase 11	50515	protein_coding
ENSG00000122025	FLT3		12.4	1	0.503963				0				0		0	24.6145	25.2	30.1	18.5	0	12.4	0	0.3	0.1	0	0.1	0	0	0.2	0	0.7	0	0	0.1	0.4	0	0	0	0	2.4	0	0	fms-related tyrosine kinase 3	2322	protein_coding
ENSG00000188243	COMMD6		7.3	1	0.337097				0				0		0	21.8051	17.9	22.8	24.7	0.3	1.5	7.3	0	0.1	0	0	2.6	0	1.7	1	0	0.3	0.7	0	0.4	0	1	4.1	0	0.9	2.1	1.7	COMM domain containing 6	170622	protein_coding
ENSG00000005812	FBXL3		22.8	1	0.618794				0			16.8	1		0	36.9181	41.1	38.7	31	1.1	22.8	0	0.4	0	0	0.3	0	0.3	1	0	0	0.1	0	0	0.3	0	2	0	0.2	0.3	0.9	16.8	F-box and leucine-rich repeat protein 3	26224	protein_coding
ENSG00000211809	TRAV27		9.7	1	3.53133				0				0		0	2.70376	1.4	2.6	4.1	0	0	0	9.7	0	0	0	0	0	0	0	0	0	0	0.1	0	0	0	0	0	0.9	0.6	0	T cell receptor alpha variable 27	NA	TR_V_gene
ENSG00000211836	TRAJ54		1.8	1	2.01249				0				0		0	0.848882	0.4	0.2	1.9	0	0	0	1.8	0	0	0	0	0	0	0	0.1	0	0	0	0	0	0	0	0	0	0	0	T cell receptor alpha joining 54	NA	TR_J_gene
ENSG00000198252	STYX		1.8	1	0.473028				0			85.8	2		0	3.92297	5.3	4	2.4	0	0.1	1.8	0.5	0.2	0	0	0	0	0.2	0	0	0	0	0	0	0	1.7	0	170	0.3	0.3	0	serine/threonine/tyrosine interacting protein	6815	protein_coding
ENSG00000165617	DACT1		2.6	1	0.789298				0			6.8	5		0	3.28102	2	2.4	5.4	0	2.6	0.2	0	0.1	0.1	0	0.2	0	0	0	0	0	0	0	0	0	6.3	1	15.8	0.6	6.4	4.6	dishevelled-binding antagonist of beta-catenin 1	51339	protein_coding
ENSG00000134001	EIF2S1		264.6	1	0.543016				0				0		0	487.399	566.4	500.3	395.5	2.3	7.1	264.6	3.7	3.6	1.5	5.4	9.1	8	3.9	6.4	2.1	1.3	1.8	0.1	1.3	0.3	0.7	0.3	2.7	8.7	0.9	4.6	eukaryotic translation initiation factor 2, subunit 1 alpha, 35kDa	1965	protein_coding
ENSG00000088808	PPP1R13B		3.9	1	0.29816				0				0		0	13.0931	12.4	17.1	9.8	0	3.9	0	0.1	0.1	0	0	2.5	0	0	0	0.1	0	0	0	0.1	0	0.5	0	0.4	2.4	0.6	0	protein phosphatase 1, regulatory subunit 13B	23368	protein_coding
ENSG00000156411	C14orf2		36	1	0.435895				0			72.4	1		0	82.6061	74.2	79.3	94.3	0.6	36	1.1	1.6	0.4	0.2	0.4	1.2	0.4	2	1.8	0.3	0.4	0.3	0	0.4	0	7.9	1.3	3	7.5	72.4	2.2	chromosome 14 open reading frame 2	9556	protein_coding
ENSG00000128731	HERC2		3.5	1	0.423028				0				0		0	8.29904	9.2	9.5	6.3	0	3.5	0.2	0.3	0	0	0	0	0	0.5	0.2	0	0	0	0	0	0	1	0	0	1.2	0.6	0.7	HECT and RLD domain containing E3 ubiquitin protein ligase 2	8924	protein_coding
ENSG00000166947	EPB42		1	1	0.60783				0				0		0	1.72956	2.2	2.1	0.8	0	1	0	0	0	0	0	0	0	0	0	0	0	0	0	0	0	0	0	0	0.3	0	0	erythrocyte membrane protein band 4.2	2038	protein_coding
ENSG00000171016	PYGO1		1	1	0.69081				0				0		0	1.5158	1.4	0.9	2.2	0	1	0	0.3	0	0	0	0	0	0	0	0	0	0	0	0	0	0	0	0	0	0	0	pygopus family PHD finger 1	26108	protein_coding
ENSG00000177082	WDR73		2	1	0.36655				0				0		0	5.43887	5.3	6.4	4.6	0	0	0	2	0	0	0	0	0	0	0	0	0	0	0	0.1	0	0.3	0	0	0	0	0	WD repeat domain 73	84942	protein_coding
ENSG00000166579	NDEL1		3.5	1	0.413529				0			34.3	4		0	8.49082	6.5	13.5	5.4	0	3.5	0	0	0	0	0	0	0	0.3	0	0	0	0	0	0	0	3.3	0.5	3.9	12.6	0	117.5	nudE neurodevelopment protein 1-like 1	81565	protein_coding
ENSG00000160551	TAOK1		51.5	1	0.607646				0				0		0	84.7678	85.2	102.8	66.3	0	0	0	2	51.5	0.2	0	4.3	1.2	3.6	0.2	0	0	0.1	0	0.9	0.1	1.8	0	10.1	1.8	0.6	0.2	TAO kinase 1	57551	protein_coding
ENSG00000108700	CCL8		7.9	1	0.276203				0				0		0	28.6118	19.9	36.6	29.4	0	7.9	0.2	0.1	0.1	0.1	0	0	0	0.3	0.6	0	0	0	0	0	0	0	0	0.2	0.9	0	1.9	chemokine (C-C motif) ligand 8	6355	protein_coding
ENSG00000231256	C17orf105		28.4	1	0.380676				0				0		0	74.6089	73.6	83.1	67.1	2.4	28.4	0	0.3	1.3	0	0	0	0	3.2	2.2	0.6	0.3	0.7	0	0.2	0.1	2.1	0.8	1.1	9	0.6	1.2	chromosome 17 open reading frame 105	284067	protein_coding
ENSG00000108960	MMD		1.4	1	0.429865				0				0		0	3.23403	3.9	2.8	3	1.4	0	0	0	0	0	0	0	0	0	0.1	0	0	0.1	0	0	0	0	0	0	0	0	0	monocyte to macrophage differentiation-associated	23531	protein_coding
ENSG00000266173	STRADA		1.5	1	0.380228				0			2.4	1		0	4.15143	2.2	4.5	5.7	0	1.5	0	0	0	0	0	0	0	0	0.1	0.2	0	0	0	0	0	0.2	0	0	2.4	0	0	STE20-related kinase adaptor alpha	92335	protein_coding
ENSG00000256525	POLG2		44.5	1	0.699795				0			82.6	1		0	63.5842	75.3	73.1	42.4	9.3	0.9	0.2	4.3	0.3	44.5	1.1	2.1	0	2.7	2.5	0.2	0	0.1	0	0.4	0	2.1	0	2.7	4.5	82.6	0.7	polymerase (DNA directed), gamma 2, accessory subunit	11232	protein_coding
ENSG00000082397	EPB41L3		21.4	1	0.264123				0				0		0	81.1891	78.1	77.1	88.3	0.5	21.4	0	1.6	0	0.2	0.7	2.8	1.6	0.2	2.8	0.5	0.1	0.3	0.2	0.4	0	0.2	0	0.4	1.5	0.3	0.5	erythrocyte membrane protein band 4.1-like 3	23136	protein_coding
ENSG00000081913	PHLPP1		8.1	1	0.398211				0				0		0	20.4778	9.8	35.4	16.3	0	8.1	0	0	0	0	0.3	1.2	0	0	0	0	0	0	0	0.1	0	0.3	0.3	0.2	0.3	0.3	0.2	PH domain and leucine rich repeat protein phosphatase 1	23239	protein_coding
ENSG00000125869	LAMP5		5.7	1	0.386503				0				0		0	14.7602	10	16.4	17.9	0	5.7	0	0.1	1.8	0	0	0.3	0.1	3.4	0.5	0	0.3	0.2	0.1	0	0	0	0	0	1.2	0.3	0	lysosomal-associated membrane protein family, member 5	24141	protein_coding
ENSG00000213988	ZNF90		5.2	1	0.841871				0				0		0	6.20965	6.9	3.6	8.2	5.2	0	0.3	0.7	0	0	0.4	0.2	0	0.2	0	0.5	0	0	0	0.4	0	0.2	0	0	0.6	0.3	0	zinc finger protein 90	7643	protein_coding
ENSG00000182141	ZNF708		3	1	2.34455				0				0		0	1.24356	2.4	0.5	0.8	0.1	0	0	0.1	3	0	0	0.3	0	0	0	0	0	0	0	0.1	0	0.7	0.8	0	0.6	0	0	zinc finger protein 708	7562	protein_coding
ENSG00000186020	ZNF529		4.7	1	0.428368				0			69.2	4		0	11.0987	17.1	13.8	2.4	0	0	4.7	0	1.4	0	0.5	0	0.7	0	1.3	0	0	0	0	0	0	42.5	205.4	5.8	0	2.1	23.1	zinc finger protein 529	57711	protein_coding
ENSG00000196381	ZNF781		2.8	1	0.26236				0				0		0	10.9543	18.3	8.3	6.3	0	2.8	0	0.7	0.4	0	0	0	0.9	0	0.1	0	0	0	0	0	0	0	0	0	2.1	0	0	zinc finger protein 781	163115	protein_coding
ENSG00000126457	PRMT1		1.5	1	2.38115				0				0		0	0.61121	0	0.5	1.4	0	0	1.5	0	0	0	0	0	0	0.3	0	0	0	0	0	0	0	0	0	0.5	0.9	0	0.2	protein arginine methyltransferase 1	3276	protein_coding
ENSG00000196267	ZNF836		3.4	1	0.582052				0			45	4		0	5.95999	5.9	5.5	6.5	0	0	0	0.1	0	3.4	0	0.2	0	0	0	0	0	0	0.1	0	0	152.9	0	2.5	1.2	8.2	16.6	zinc finger protein 836	162962	protein_coding
ENSG00000198482	ZNF808		3.4	1	1.27344				0				0		0	2.62222	4.7	2.4	0.8	0	3.4	0	0.1	0	0	0	0	0	0	0	0	0	0	0	0	0	0.5	0	0	0.3	0	0	zinc finger protein 808	388558	protein_coding
ENSG00000172967	XKR3		41	1	0.497731				0				0		0	82.442	126.1	80.5	40.8	0.1	41	0	0.1	0	0	2.9	0.5	0.3	3.4	1	0.1	0.1	0.2	0	0	0	1.2	0	0.2	6.6	0	0	XK, Kell blood group complex subunit-related family, member 3	150165	protein_coding
ENSG00000100068	LRP5L		1.3	1	0.735606				0				0		0	1.76539	0.8	0.9	3.5	0	0	0	1.3	0	0	0	0	0	0	0	0	0	0	0	0	0	0	0	0	0	0	0	low density lipoprotein receptor-related protein 5-like	91355	protein_coding
ENSG00000128313	APOL5		4.9	1	1.968				0				0		0	2.45416	2	2.6	2.7	0	0.8	4.9	0	0	0.1	0.2	0	0	0	0	0	0	0	0	0	0	0	0	0	0	0	0	apolipoprotein L, 5	80831	protein_coding
ENSG00000100393	EP300		11.3	1	0.377557				0			13.8	3		0	30.1397	17.5	40.6	32.3	0.1	11.3	0	0	0.1	0.1	0.4	1.3	2.1	0.2	3.3	0	0	0	0	0	0	10.2	0	4.8	7.5	10.3	20.9	E1A binding protein p300	2033	protein_coding
ENSG00000100410	PHF5A		2.2	1	0.313156				0				0		0	7.23889	6.3	6.2	9.2	0	0	0	2.2	0.4	0	0	0	0.2	0.3	0	0	0	0.1	0	0.1	0	0	0	0.5	0	0.6	0	PHD finger protein 5A	84844	protein_coding
ENSG00000156273	BACH1		3.9	1	0.394948				0				0		0	9.87221	13.6	5.9	10.1	0	3.9	0	0.1	0	0	1.4	0.3	0	0	0.4	0.1	0	0	0	0	0	0	1.3	0	0.3	0	0	BTB and CNC homology 1, basic leucine zipper transcription factor 1	571	protein_coding
ENSG00000205758	CRYZL1		655.1	1	0.626395				0			909.6	2		0	1045.87	1113.3	1007.5	1016.8	7	655.1	2.4	3.5	7	2.6	9.8	49.1	8	25.7	13.5	2.7	2.5	3.1	0.7	2.5	0.1	1049.8	769.4	37.2	73.2	55.7	164.9	crystallin, zeta (quinone reductase)-like 1	9946	protein_coding
ENSG00000183527	PSMG1		75.4	1	0.322995				0				0		0	233.671	311	228.3	161.7	5.1	75.4	1.7	3.8	0.6	0.9	0	11.9	3.5	0.7	11.1	0.7	0.4	1.6	0	0.6	0.1	0.8	2.5	2.8	7.5	1.5	0.7	proteasome (prosome, macropain) assembly chaperone 1	8624	protein_coding
ENSG00000178074	C2orf69			0				2	4	0.7	0.550641		0		0	2.79176	4.5	3.1	0.8	0	0	0	0	0	0	2.9	1.2	0.1	2.2	1.8	0	0	0	0	0	0	0	0	0	0	0.3	0	chromosome 2 open reading frame 69	205327	protein_coding
ENSG00000113810	SMC4			0				76.6	2	0.8	0.740465		0		0	95.4422	116.9	74.5	94.9	1.7	4.9	0.3	0.6	1.3	2	1.1	4	4.8	33.2	120	0.1	0.6	0.6	0	0	0	2.6	2.8	19.5	7.5	1.5	7.2	structural maintenance of chromosomes 4	10051	protein_coding
ENSG00000122026	RPL21			0				1.3	2	0.4	0.0862119		0		0	3.67547	2.2	5	3.8	0	0.6	0.3	0	0	0	0	1.6	0	0	1	0	0	0	0	0	0	0.2	0.3	0	0	0	0.5	ribosomal protein L21	6144	protein_coding
ENSG00000129534	MIS18BP1			0				7.2	2	0.3	0.0626805		0		0	21.8547	30.1	19.7	15.8	0	0	0.3	0.1	0.5	0	0	4.8	8.8	0	5.6	0	0	0	0	0.4	0	5	0	0	1.8	0	0.7	MIS18 binding protein 1	55320	protein_coding
ENSG00000119616	FCF1			0				6	2	0.4	0.0280402		0		0	13.817	14.4	16.1	10.9	1	0	0	0	0.3	0	0	0	4.8	7.2	0.2	0	0	0	0	0	0	0.2	0.5	0	0	0.6	2.4	FCF1 rRNA-processing protein	51077	protein_coding
ENSG00000121057	AKAP1			0				9.7	2	0.4	0.0621812		0		0	25.562	16.7	28.5	31.5	0.6	0.1	0.2	0.1	0.1	0.1	12.7	0.3	6.7	0.5	0.1	0	0	0.2	0	0.1	0	0.3	0	0.9	3.6	0.6	1	A kinase (PRKA) anchor protein 1	8165	protein_coding
ENSG00000198185	ZNF334			0				21.7	2	0.4	0.324174		0		0	51.4659	97	33.5	23.9	0.7	0.8	0	0.8	0	0.7	0.2	20.1	0.1	23.3	0	0.1	0	0.2	0	0.1	0	9.3	0	0.5	0.6	1.2	1.9	zinc finger protein 334	55713	protein_coding
ENSG00000142621	FHAD1			0				4.9	1	0.3			0		0	19.1954	12.8	19.2	25.5	0	0.1	0	0.4	0	0.1	0	0.2	0	4.9	0	0	0.1	0	0	0	0	0.2	0	0.4	1.2	0.6	1	forkhead-associated (FHA) phosphopeptide binding domain 1	114827	protein_coding
ENSG00000130695	CEP85			0				1.2	1	0.5			0		0	2.52318	0.6	2.6	4.3	0	0	0	0	0	0	0	1.2	0	0.2	0	0	0	0	0	0	0	0	0.3	0	0	0.3	0	centrosomal protein 85kDa	64793	protein_coding
ENSG00000092853	CLSPN			0				1.2	1	2.3		1.3	3		0	0.48616	0	1.2	0.3	0	0	0	0	0	0	0	0	0	1.2	0	0	0	0	0	0	0	0.7	1.5	1.2	0	0.6	1.2	claspin	63967	protein_coding
ENSG00000214114	MYCBP			0				6.1	1	0.3			0		0	22.8467	27.7	29.2	11.7	1.8	0.8	0	0.3	0.3	0	0	6.1	0.4	0.2	0.2	0	0	0.2	0	0	0	0	0.3	0.2	0.9	0	0	MYC binding protein	26292	protein_coding
ENSG00000157184	CPT2			0				1	1	1.1		1.2	1		0	0.916511	0.4	0.7	1.6	0	0	0	0	0	0	0.2	0	0	1	0	0	0	0	0	0	0	0	0	0	0	1.2	0	carnitine palmitoyltransferase 2	1376	protein_coding
ENSG00000057468	MSH4			0				3.9	1	0.3		4.8	1		0	14.6237	13.2	13.5	17.1	0	0	0	0	0	0	0	0.2	0.7	0.3	3.9	0	0	0.1	0	0	0.1	0.2	0.5	0.4	0.9	4.8	0.2	mutS homolog 4	4438	protein_coding
ENSG00000162664	ZNF326			0				2.9	1	0.5			0		0	6.4319	8.7	7.8	2.7	0	0.5	0.2	0	0.6	0	0	0.3	0.3	2.9	0.1	0	0	0	0	0	0	0.2	0	0.5	1.2	0	0	zinc finger protein 326	284695	protein_coding
ENSG00000203910	C1orf146			0				20.6	1	0.5			0		0	38.6222	44.9	43.2	27.7	0.5	2.2	0	0	0.5	0	0.5	20.6	0.8	0.2	0.2	0	0.1	0.1	0	0.8	0	0.3	0	1.1	4.2	1.8	1	chromosome 1 open reading frame 146	388649	protein_coding
ENSG00000255854	PPIAL4B			0				2.4	1	4.9		11.5	4		0	0.452209	0.6	0.5	0.3	0.2	0	0.6	0	0.4	0.1	0	0.3	0.1	2.4	0	0	0	0	0	0	0	15.9	1	19.3	0.6	0.6	9.9	peptidylprolyl isomerase A (cyclophilin A)-like 4B	164022	protein_coding
ENSG00000197956	S100A6			0				2.1	1	0.4		6.4	5		0	6.11771	5.3	7.4	5.7	0.2	0	0	0.2	0.1	0	0.2	2.1	0.1	0.2	0.6	0	0	0	0	0	0	7.9	0.5	2.3	9.3	4.2	8.4	S100 calcium binding protein A6	6277	protein_coding
ENSG00000163554	SPTA1			0				1.1	1	0.3		1.9	3		0	3.43658	3.5	5.2	1.6	0	0.1	0	0	0	0	0	0	0	0	1.1	0	0	0.2	0	0.2	0	3.1	1	1.6	0	0.3	1	spectrin, alpha, erythrocytic 1 (elliptocytosis 2)	6708	protein_coding
ENSG00000213088	DARC			0				1.2	1	0.3			0		0	4.08208	3.3	5.5	3.5	0	0.4	0	0	0	0	0	1.2	0	0.2	0	0	0	0	0	0	0	0.2	0	0	0.6	0.3	0.7	Duffy blood group, atypical chemokine receptor	2532	protein_coding
ENSG00000162734	PEA15			0				1.5	1	8			0		0	0.146908	0.2	0.2	0	0	0	0	0	0	0	0	0	0	1.5	0	0	0	0	0	0	0	0.2	0	0.7	0	0	0	phosphoprotein enriched in astrocytes 15	8682	protein_coding
ENSG00000143256	PFDN2			0				1.2	1	0.5		4.4	3		0	2.27452	0.8	1.7	4.3	0	0.3	0	0	0	0	1.2	0.3	0	0	0	0	0	0	0	0	0	0.3	0	8.5	1.2	0	3.4	prefoldin subunit 2	5202	protein_coding
ENSG00000158850	B4GALT3			0				4.9	1	0.8			0		0	6.36698	4.3	8.3	6.5	0	0	0	0	0.1	0	0	4.9	0	0	0	0	0	0	0	0.1	0	0.8	0.5	0.7	0.6	0.3	1.2	UDP-Gal:betaGlcNAc beta 1,4- galactosyltransferase, polypeptide 3	8703	protein_coding
ENSG00000162687	KCNT2			0				4.6	1	0.3			0		0	17.7474	20.9	24.7	7.6	0	1.3	0	0	0	0	4.6	0	0	0	0	0	0	0	0	0.4	0	1	1.5	0.4	0.3	0.6	0.5	potassium channel, subfamily T, member 2	343450	protein_coding
ENSG00000117707	PROX1			0				8.1	1	0.3			0		0	24.9959	15.7	29.4	29.9	0	6.1	0	0.8	0.2	0	0	2.1	0	0	8.1	0.1	0.4	0.8	0.1	0	0	0.7	0.3	0.7	0	0.6	4.8	prospero homeobox 1	5629	protein_coding
ENSG00000172554	SNTG2			0				3.2	1	0.3			0		0	10.9357	12.8	8.3	11.7	0	0	0	0	0.2	0	0	0	0.1	3.2	0	0	0	0	0	0	0	0.2	0.3	0.2	0	0	0	syntrophin, gamma 2	54221	protein_coding
ENSG00000021574	SPAST			0				10.8	1	0.5			0		0	21.3975	23.4	16.6	24.2	0.2	0	0	0	0.1	0.2	0	0.2	0.3	0.5	10.8	0	0	0	0	0.2	0	0.2	4.3	0	0.3	0	0.5	spastin	6683	protein_coding
ENSG00000138041	SMEK2			0				10.7	1	0.3			0		0	36.1528	56.9	30.9	20.7	0	0	0	0.9	2.8	0	1.6	0	10.7	1.2	0	0	0	0.1	0	0	0.1	0	0	5.3	5.7	0	1.9	SMEK homolog 2, suppressor of mek1 (Dictyostelium)	57223	protein_coding
ENSG00000116001	TIA1			0				5.9	1	0.3		8.7	1		0	21.6917	21.2	19.5	24.5	0	0	0	0	0.1	0.1	5.9	4	0	2.6	0.1	0.5	0	0.1	0	0	0	0	0	1.1	8.7	0.9	1.2	TIA1 cytotoxic granule-associated RNA binding protein	7072	protein_coding
ENSG00000153093	ACOXL			0				7.8	1	0.5			0		0	16.0068	10	15	23.1	0	3.1	0.9	0	0	0	0	0	0.3	7.8	0.4	0	0	0	0	0	0	0	0	0	0.3	0	0	acyl-CoA oxidase-like	55289	protein_coding
ENSG00000169967	MAP3K2			0				10.2	1	0.8			0		0	12.2355	13.8	10.9	12	0	0	0	0.5	0	0	0	0.7	0.2	0	10.2	0	0	0	0	0.1	0	0.5	3	0.4	0	0.9	0	mitogen-activated protein kinase kinase kinase 2	10746	protein_coding
ENSG00000168288	MMADHC			0				252.1	1	0.3		17337	6		0	739.753	762.5	691.1	765.6	5.1	28	1.8	149.1	43.5	2.8	13.9	106.3	14.9	252.1	65.8	2.7	2.6	6.2	0.7	4.3	0.4	2521.4	417.2	445.2	67818	19862	12958.3	methylmalonic aciduria (cobalamin deficiency) cblD type, with homocystinuria	27249	protein_coding
ENSG00000182389	CACNB4			0				3.1	1	0.3		3.9	1		0	10.3347	15.9	6.2	9	0.3	0	0	0	0	0	0	3.1	0	0	0	0	0	0	0	0	0	0.5	0.5	0.5	3.9	0.9	0.7	calcium channel, voltage-dependent, beta 4 subunit	785	protein_coding
ENSG00000115221	ITGB6			0				1	1	0.5			0		0	2.31725	4.7	1.2	1.1	0	0	0	0	0.1	0	0	0	0	0	1	0	0	0	0	0	0	0.5	0.3	0	0.9	0	0.5	integrin, beta 6	3694	protein_coding
ENSG00000018510	AGPS			0				115.2	1	0.8		69.5	1		0	141.692	188.3	146	90.8	3.4	12.6	1.8	1.4	0.3	2.2	0.4	4.9	1	115.2	3.5	0.5	0.3	2.2	0	1.5	0.4	33.7	69.5	1.8	1.8	3.6	2.9	alkylglycerone phosphate synthase	8540	protein_coding
ENSG00000115896	PLCL1			0				7.7	1	0.3		7.2	1		0	26.4338	15.5	30.1	33.7	0.2	0	0	0	0	0	2.4	0	0.8	7.7	0	0	0.1	0.2	0	0.2	0	0	0	0	7.2	2.7	0.2	phospholipase C-like 1	5334	protein_coding
ENSG00000013441	CLK1			0				357.2	1	0.3		537.9	1		0	1133.71	1503.2	1029.8	868.1	10	49.9	2.3	4.2	14.8	0.6	15.5	28.5	111.6	357.2	22.7	1.7	1.9	5.9	1.2	3.7	0.5	64.1	537.9	24.4	13.1	23.9	20	CDC-like kinase 1	1195	protein_coding
ENSG00000187736	NHEJ1			0				8.7	1	0.3			0		0	33.803	29.7	35.8	35.9	0	0.3	0	0	0.1	0	0	0.2	0.2	8.7	0.2	0	0	0	0	0.3	0	0.2	0.8	1.4	0.9	0.3	0.2	nonhomologous end-joining factor 1	79840	protein_coding
ENSG00000163516	ANKZF1			0				2	1	1.1			0		0	1.78792	1.8	0	3.5	0	0	0	0	0	0	0	2	0	0	0	0	0	0	0	0.1	0	0	0.3	0.4	0	0	0.2	ankyrin repeat and zinc finger domain containing 1	55139	protein_coding
ENSG00000116106	EPHA4			0				5.9	1	0.3			0		0	18.8975	12.2	24.9	19.6	0	0	0	0.5	0.1	0	0.8	5.9	0	0.5	0.1	0	0	0.3	0	0.1	0.1	0.2	4.1	0	0.6	0.6	0.2	EPH receptor A4	2043	protein_coding
ENSG00000114026	OGG1			0				1.6	1	0.3			0		0	5.80237	5.1	5	7.3	0	0	0	0.1	0	0	0	1.6	0	0	0	0	0	0	0	0	0	0	0	0	0.9	0.3	0.2	8-oxoguanine DNA glycosylase	4968	protein_coding
ENSG00000144554	FANCD2			0				8.2	1	0.3			0		0	31.0226	26.6	31.1	35.3	0	1.8	0.3	0.8	0	0	0.4	8.2	0	2	0.2	0.1	0.3	0.5	0.2	0.4	0.2	0.3	5.3	0	5.7	0.9	1	Fanconi anemia, complementation group D2	2177	protein_coding
ENSG00000268279	RP11-434D12.1			0				1.6	1	0.4		2.3	1		0	4.50095	3.7	5.2	4.6	0	0	0	0	0	0.2	0	1.6	0.2	0	0	0	0	0	0	0.1	0	2.3	0	0.7	0	0.6	0		NA	protein_coding
ENSG00000092345	DAZL			0				6.6	1	0.3			0		0	21.479	27.9	25.2	11.4	0	0	0	0	0	0	0.1	6.6	1.1	0	0.4	0	0	0.3	0	0.2	0	0	0	0	1.2	0.3	0.5	deleted in azoospermia-like	1618	protein_coding
ENSG00000144681	STAC			0				1.2	1	2.1			0		0	0.576924	0.2	0.7	0.8	0	0	0	0	0	0	0	0	0	0	1.2	0	0	0	0.5	0	0	0	0	0	0	0	0	SH3 and cysteine rich domain	6769	protein_coding
ENSG00000168329	CX3CR1			0				1.6	1	0.8		2.7	1		0	2.19308	2.6	2.8	1.1	0	0	0	0	0	0	0	1.6	0	0	0	0	0	0	0	0	0	0	0	0.5	0.6	2.7	0	chemokine (C-X3-C motif) receptor 1	1524	protein_coding
ENSG00000172888	ZNF621			0				1.7	1	0.9			0		0	1.95541	2.2	3.1	0.5	0	0	0	0.7	0	0	0	0	0	1.7	0	0	0	0	0	0	0	0	0	0	0.3	0.3	0	zinc finger protein 621	285268	protein_coding
ENSG00000244607	CCDC13			0				3.3	1	0.6		2.3	1		0	5.63189	5.7	5.2	6	0	1	0	0.1	0	0.3	0.1	3.3	0	0.2	0	0	0	0	0	0	0	0.2	0.3	2.3	0.6	0	0.7	coiled-coil domain containing 13	152206	protein_coding
ENSG00000164088	PPM1M			0				1.3	1	0.3		2.1	1		0	5.07754	3.5	6.9	4.9	0	0	0	0.3	0	0	0.5	1.3	0	0.3	0	0	0	0	0.1	0	0	0.2	0.3	0	2.1	0	0.2	protein phosphatase, Mg2+/Mn2+ dependent, 1M	132160	protein_coding
ENSG00000163376	KBTBD8			0				2.3	1	0.4			0		0	6.25441	5.5	5.9	7.3	0	0	0	0.4	0	0	0	0	0	0	2.3	0	0	0	0	0	0	0.3	0.3	0.7	0.6	0	0	kelch repeat and BTB (POZ) domain containing 8	84541	protein_coding
ENSG00000113805	CNTN3			0				10.6	1	0.4		24.8	1		0	24.5351	32.5	22.3	18.8	0	0	0.3	0	0	0	0	10.6	0	0.9	0.1	0	0	0	0	0	0	0.5	0	0.2	0.3	0.3	24.8	contactin 3 (plasmacytoma associated)	5067	protein_coding
ENSG00000178700	DHFRL1			0				2.5	1	0.3			0		0	7.77165	7.1	4.5	11.7	0.2	0.3	0	0	0.1	0	0	2.5	0	0	0	0	0.1	0	0	0	0	0.2	0	0	0	0	0.5	dihydrofolate reductase-like 1	200895	protein_coding
ENSG00000183185	GABRR3			0				2.9	1	0.6			0		0	5.03193	3.9	6.9	4.3	0	0	0	0	0	0	0	0	2.9	0	0	0	0	0	0	0	0	0	0	0	0.3	0	0.2	gamma-aminobutyric acid (GABA) A receptor, rho 3	200959	polymorphic_pseudogene
ENSG00000174500	GCSAM			0				1.2	1	0.3		1.5	1		0	4.09518	3.7	2.4	6.3	0	0	0	0.1	0	0	0	1.2	0	0	0.2	0	0	0	0	0	0	0.2	1.5	0.2	0.9	0.3	0	germinal center-associated, signaling and motility	257144	protein_coding
ENSG00000114573	ATP6V1A			0				8.7	1	0.4			0		0	22.384	32.9	20.9	13.3	0	0	0	0.1	0	0	0.5	0	3.4	8.7	0	0	0.1	0	0	0	0	0.2	0	1.2	0.6	0.3	0.5	ATPase, H+ transporting, lysosomal 70kDa, V1 subunit A	523	protein_coding
ENSG00000144847	IGSF11			0				3.1	1	0.3		15.4	1		0	9.72679	10.6	6.6	12	0.5	0	0	0.2	0.1	0	0	3.1	0.1	0	0.7	0.1	0	0	0	0	0.2	0.2	1	0.7	0.6	15.4	0	immunoglobulin superfamily, member 11	152404	protein_coding
ENSG00000144868	TMEM108			0				1	1	8.4			0		0	0.0791126	0	0.2	0	0	0.1	0	0	0	0	0	0	0	0	1	0	0	0	0	0	0	0	0.3	0	0	0	0	transmembrane protein 108	66000	protein_coding
ENSG00000120742	SERP1			0				1.9	1	0.4		28.8	1		0	5.12299	7.5	2.1	5.7	0	0	0	0	0	0.2	0.3	0	0	0.5	1.9	0	0	0	0	0.1	0.2	28.8	1	0	0	0	0.2	stress-associated endoplasmic reticulum protein 1	27230	protein_coding
ENSG00000068885	IFT80			0				7.6	1	0.4			0		0	20.0307	27.9	23.3	9	0	1.3	0	0.4	1.4	0	0.1	0	7.6	0	0.1	0	0	0	0	0.5	0	0.2	0	0	0	0	0	intraflagellar transport 80 homolog (Chlamydomonas)	57560	protein_coding
ENSG00000152492	CCDC50			0				1.4	1	0.3		1.4	1		0	5.16853	5.5	4	6	0	0	0	0.1	0.2	0.2	1.4	0	0	0.2	0.1	0	0	0.1	0	0.2	0	0	0	1.4	0.3	0	0	coiled-coil domain containing 50	152137	protein_coding
ENSG00000075711	DLG1			0				10.2	1	0.4		11.9	1		0	26.6252	34.2	27.8	17.9	0.3	0	0.2	0	0.1	0	0	10.2	0.1	0	1.6	0	0	0.5	0	0.1	0	11.9	4.8	0.2	0.3	0.9	0	discs, large homolog 1 (Drosophila)	1739	protein_coding
ENSG00000132406	TMEM128			0				10.4	1	0.6			0		0	17.3328	16.5	23	12.5	0.1	0	0	0	0.3	0	0.1	0	0	0	10.4	0	0	0.2	0	0	0	0	0.8	0	0.6	0	0	transmembrane protein 128	85013	protein_coding
ENSG00000091490	SEL1L3			0				57.3	1	0.4			0		0	160.328	134.2	163.3	183.5	0.7	0.8	0	0.3	0.2	0.4	0.1	3.3	57.3	0	32.6	0.1	0.9	0	0.1	0.4	0	4.6	0.3	2.1	4.5	1.5	7.7	sel-1 suppressor of lin-12-like 3 (C. elegans)	23231	protein_coding
ENSG00000250038	RP11-180C1.1			0				1.5	1	0.3			0		0	5.79722	8.1	9.3	0	0	0	0	0	0	0	0.2	1.5	0.2	0	0.4	0	0	0.1	0	0	0	0.2	0	0	0	0	0	Uncharacterized protein	NA	protein_coding
ENSG00000014824	SLC30A9			0				25.9	1	0.3		666.5	2		0	88.8346	80.7	89	96.8	0	0.4	0	0.4	0.5	0.1	25.9	3	1.6	1.5	1.1	0.2	0	0.2	0.1	0	0	83.3	3.6	1249.6	3	1.5	0.7	solute carrier family 30 (zinc transporter), member 9	10463	protein_coding
ENSG00000151834	GABRA2			0				10.1	1	0.6			0		0	17.2891	20.7	15.9	15.2	0	0	0	0.1	0	0	0	10.1	0	0.7	0	0	0	0	0	0	0	0	0.3	0	0.6	0	0	gamma-aminobutyric acid (GABA) A receptor, alpha 2	2555	protein_coding
ENSG00000109158	GABRA4			0				12.5	1	0.7			0		0	18.2156	17.7	22.5	14.4	0	0	0.2	0	0	0	0	12.5	0	0	0	0	0	0.8	0	0	0	0	0	0	0	0.3	0.5	gamma-aminobutyric acid (GABA) A receptor, alpha 4	2557	protein_coding
ENSG00000145247	OCIAD2			0				8.6	1	0.5			0		0	15.8812	15.5	27.3	4.9	0	0.4	0	0.1	0.9	0.3	0	8.6	0.5	0.2	0.4	0	0.1	0	0	0.4	0	1.2	0.3	0.2	0.9	0	0.7	OCIA domain containing 2	132299	protein_coding
ENSG00000109265	KIAA1211			0				1.2	1	1.3			0		0	0.859591	1	0.5	1.1	0	0	0	0	0	0	0	1.2	0	0	0	0	0	0	0	0	0	0.7	0	0	0.3	0.3	0	KIAA1211	57482	protein_coding
ENSG00000109320	NFKB1			0				18.4	1	0.3		410.3	3		0	58.0699	44.9	55.1	74.2	0	0	0.3	0.2	0.4	0	18.4	0.2	0.2	0.2	0	0.1	0	0.1	0.5	0.4	0	15.4	26.6	1188.9	3	10.9	1	nuclear factor of kappa light polypeptide gene enhancer in B-cells 1	4790	protein_coding
ENSG00000151014	CCRN4L			0				1.1	1	0.3			0		0	4.29833	2.4	4.7	5.7	0	0	0	0	0	0	0	0	0.2	0	1.1	0	0	0	0	0	0	0	0.3	0	0.6	0	0.2	CCR4 carbon catabolite repression 4-like (S. cerevisiae)	25819	protein_coding
ENSG00000170153	RNF150			0				1.2	1	0.3		32.4	2		0	4.11609	4.3	4.3	3.8	0	0	0	0	0	0	0.2	0	1.2	0	0.2	0	0	0	0	0	0	0.5	2.5	62.3	0.3	0	0.7	ring finger protein 150	57484	protein_coding
ENSG00000109458	GAB1			0				10.5	1	0.4			0		0	29.2497	26	41.1	20.7	0	1.3	0.3	0.1	0	0	0	0.2	1.3	0	10.5	0.2	0	0	0	0.3	0	0.2	0.5	0	0.3	0.3	0.5	GRB2-associated binding protein 1	2549	protein_coding
ENSG00000113456	RAD1			0				11.7	1	0.3			0		0	43.0375	39.1	34.9	55.2	0.6	1.5	0	0.2	0.1	0	0	11.7	0.9	3.6	0.5	0.1	0.7	0	0.2	0.2	0	0.2	0	0	3.9	0	0.2	RAD1 homolog (S. pombe)	5810	protein_coding
ENSG00000113296	THBS4			0				5.3	1	0.5			0		0	10.0792	7.7	7.8	14.7	0	0.3	0	0	0.1	0	0	5.3	0	0.5	0.2	0.1	1.6	0	0	0	0	0.8	0.8	0.4	2.4	1.8	0.2	thrombospondin 4	7060	protein_coding
ENSG00000168916	ZNF608			0				1.7	1	0.3		361.2	4		0	5.27893	6.3	7.4	2.2	0	0	0	0	0	0	0	0	0	1.7	0	1.3	0	0	0	0.3	0	113.9	0.3	82.2	1247	0	1.7	zinc finger protein 608	57507	protein_coding
ENSG00000169252	ADRB2			0				8.5	1	0.4			0		0	21.7369	18.7	22.3	24.2	0	0.9	0	0.1	0	0.3	0.2	0	0	8.5	0	0.1	0.1	0.1	0	0.2	0	0	0.5	0.4	1.5	0	0.7	adrenoceptor beta 2, surface	154	protein_coding
ENSG00000177556	ATOX1			0				1.9	1	0.3		2.3	1		0	5.83743	4.3	4.3	9	0	0.3	0	0	0	0	0	0.7	0.1	1.9	0	0.2	0.1	0	0	0	0	0	0	2.3	0.9	0	0	antioxidant 1 copper chaperone	475	protein_coding
ENSG00000087116	ADAMTS2			0				1.4	1	0.8			0		0	1.73111	1	1.2	3	0	0	0	0	0	0	0	0	0	1.4	0	0	0	0	0	0	0	0	0.3	0	0.9	0	1	ADAM metallopeptidase with thrombospondin type 1 motif, 2	9509	protein_coding
ENSG00000113300	CNOT6			0				14.7	1	0.6		264.6	3		0	25.0731	28.9	34.7	11.7	0.6	0	0	0.3	0	0.3	0	3.6	0	1	14.7	0	0	0	0.1	0	0	522	171.7	100.2	2.7	2.7	1	CCR4-NOT transcription complex, subunit 6	57472	protein_coding
ENSG00000183718	TRIM52			0				2.1	1	1.5			0		0	1.40284	0.6	1.4	2.2	0	0	0.2	0	0	0	0.3	2.1	0	0	0.1	0	0	0	0	0.1	0	0	0	0.2	0.9	0	0.2	tripartite motif containing 52	84851	protein_coding
ENSG00000180822	PSMG4			0				7.7	1	0.5			0		0	16.4352	7.9	20.2	21.2	0	0.3	0.2	0.1	0	0	0.1	7.7	0.2	1.2	0.2	0	0.1	0	0	0.1	0	0	0	0	0	0.3	1	proteasome (prosome, macropain) assembly chaperone 4	389362	protein_coding
ENSG00000232040	SCAND3			0				10.2	1	0.5		9	1		0	21.9506	35	6.4	24.5	0.3	0.8	0.6	0.4	0.2	0	0.4	0.3	3.6	1.4	10.2	0	0.3	0	0.1	0	0	1.3	0.3	9	4.5	1.2	0	SCAN domain containing 3	114821	protein_coding
ENSG00000204305	AGER			0				1.2	1	0.3		2124.2	5		0	4.03725	3.1	5	4.1	0	0	0	0	0.1	0.1	0	0	0.2	1.2	0	0	0.4	0.2	0	0.2	0	80.8	9865.7	666.5	6.3	0.3	1.7	advanced glycosylation end product-specific receptor	177	protein_coding
ENSG00000204228	HSD17B8			0				1.6	1	0.7		2.7	1		0	2.46565	2	2.4	3	0	0	0	0.2	0	0.1	0	0	0	0	1.6	0	0	0	0	0	0	0	0	0	2.7	0	0.2	hydroxysteroid (17-beta) dehydrogenase 8	7923	protein_coding
ENSG00000172432	GTPBP2			0				5.5	1	0.6		3.6	1		0	9.46781	7.5	7.8	13	0	0	0	1	0.1	0	0	0	0.2	5.5	0	0	0	0	0	0	0	0.7	0	1.2	3.6	0	1.4	GTP binding protein 2	54676	protein_coding
ENSG00000124688	MAD2L1BP			0				1.8	1	0.6		70.3	2		0	3.03237	2.2	1.4	5.4	0	0	0	0.2	0	0.1	0	1.8	0	0.2	0	0	0	0	0	0	0	2.6	0	0	0.6	138	0	MAD2L1 binding protein	9587	protein_coding
ENSG00000096384	HSP90AB1			0				19.8	1	0.8			0		0	26.258	23.6	29.9	25.3	0.2	0.3	0.2	0	0.4	0	0	19.8	0	1.2	0.4	0.3	0	0.1	0	0	0	0.3	0	0.7	1.2	0	0	heat shock protein 90kDa alpha (cytosolic), class B member 1	3326	protein_coding
ENSG00000146147	MLIP			0				15.2	1	0.4			0		0	40.9444	41.7	29	52.2	0	0	0.2	0.1	0.1	0.1	0.1	0.5	0	0.2	15.2	0	1.2	0	0.1	0.3	0	1	0	0.4	0.3	0.3	0	muscular LMNA-interacting protein	90523	protein_coding
ENSG00000082293	COL19A1			0				1.5	1	31.7			0		0	0	0	0	0	0	0	0	0	0	0	0	0	0.1	1.5	0	0	0	0	0	0	0	0	0	0.4	0.3	0	0	collagen, type XIX, alpha 1	1310	protein_coding
ENSG00000118690	ARMC2			0				16.3	1	0.4			0		0	46.6618	59.8	44.9	35.3	0.6	0	0	0.1	0.7	0.3	0	16.3	0.5	0.3	0	0.1	0.4	0	0.1	0.3	0	0.2	0	0	0.6	0.9	0	armadillo repeat containing 2	84071	protein_coding
ENSG00000188820	FAM26F			0				2.7	1	2.9		1.2	1		0	0.915461	2.2	0.2	0.3	0	0	0.2	0	0	0	0	0	0	2.7	0	0	0	0	0	0	0	0.3	0.3	0.2	1.2	0	0	family with sequence similarity 26, member F	441168	protein_coding
ENSG00000153989	NUS1			0				1.6	1	0.3			0		0	5.72171	6.3	5.7	5.2	0	0.5	0	0.2	0	0	1.6	0	0.1	0	0.2	0	0	0	0	0	0	0.2	0.5	0.7	0.6	0	0	nuclear undecaprenyl pyrophosphate synthase 1 homolog (S. cerevisiae)	116150	protein_coding
ENSG00000186439	TRDN			0				5.3	1	0.3			0		0	15.5079	10	15.9	20.7	0	0	0	0	0.1	0	0	5.3	0	0	1.9	0	0	0.3	0	0	0	0	0.3	0.7	2.7	1.2	0.2	triadin	10345	protein_coding
ENSG00000164484	TMEM200A			0				1.5	1	0.3			0		0	5.89385	3.1	5.9	8.7	0	1.3	0	0	0	0	0	1.5	0	0.2	0	0	0	0	0	0	0	0	0	0	0	0	0	transmembrane protein 200A	114801	protein_coding
ENSG00000118514	ALDH8A1			0				3.1	1	0.8			0		0	3.99182	3.7	4.5	3.8	0	0	0	0	0	0	0	3.1	0	0	0	0	0	0	0	0	0	0.3	0	0.4	0	0	0	aldehyde dehydrogenase 8 family, member A1	64577	protein_coding
ENSG00000118491	ZC2HC1B			0				1.1	1	0.3			0		0	3.59609	3.5	3.8	3.5	0	0	0	0	0	0	0	0	1.1	0	0	0.1	0	0	0	0	0	0	0	0.4	0	0	0.2	zinc finger, C2HC-type containing 1B	153918	protein_coding
ENSG00000055211	GINM1			0				11.5	1	0.4		7.9	1		0	26.342	34.2	28	16.9	0.9	0.4	0.2	0.7	0	0.3	0.3	11.5	0.2	0	0.2	0	0.3	0	0	0	0	0.5	7.9	0.7	3.6	1.2	0	glycoprotein integral membrane 1	116254	protein_coding
ENSG00000184786	TCTE3			0				2	1	2.6			0		0	0.723665	0.2	1.4	0.5	0	0	0	0	0	0	0	2	0	0	0.1	0	0	0	0	0	0	0	0	0	0	0	0	t-complex-associated-testis-expressed 3	6991	protein_coding
ENSG00000178381	ZFAND2A			0				13.5	1	0.3		18.5	1		0	40.6937	42.5	47.2	32.3	0	1.7	0.2	0	0	0	0.3	13.5	0	0.5	0.7	0.1	0.1	0.3	0.2	0.2	0	2.3	0.3	0.4	1.8	18.5	7.9	zinc finger, AN1-type domain 2A	90637	protein_coding
ENSG00000106443	PHF14			0				65.7	1	0.4		101.8	2		0	163.636	184.3	138.1	168.5	9.5	0.1	0.2	3.2	0.4	0.1	65.7	1.3	1	11.1	1.1	0.2	1.4	1.5	0.1	0.7	0.1	67.9	1.5	7.1	16.4	135.6	35.8	PHD finger protein 14	9678	protein_coding
ENSG00000105849	TWISTNB			0				10.7	1	0.3			0		0	42.0619	28.9	31.8	65.5	0	0	0.5	0	2.9	0	0.8	10.7	0	0.9	0.6	0.1	0	0.5	0	0	0	0	0	0.4	0.6	0.3	0.5	TWIST neighbor	221830	protein_coding
ENSG00000178665	ZNF713			0				3.1	1	0.4			0		0	8.07096	9.6	11.4	3.3	0	0.1	0	0	0	0	0	0	0	0	3.1	0.3	0	0	0	0	0	0.2	0	0.2	1.2	0.6	0.2	zinc finger protein 713	349075	protein_coding
ENSG00000183166	CALN1			0				1	1	0.3			0		0	3.78832	4.5	3.1	3.8	0	0	0	0	0	0	0	0	0	1	0	0	0	0	0	0	0	0	0	0.4	0	0	0.2	calneuron 1	83698	protein_coding
ENSG00000241468	ATP5J2			0				1.2	1	0.7			0		0	1.85505	1.2	1.9	2.4	0	0	0	0	0.1	0	0	0	0.3	0	1.2	0	0	0	0	0.1	0	0.5	0	0.2	0	0.6	0	ATP synthase, H+ transporting, mitochondrial Fo complex, subunit F2	9551	protein_coding
ENSG00000196652	ZKSCAN5			0				10.7	1	0.3		380.5	1		0	34.4668	50.2	36.3	16.9	0	0	0	0	0	0	0	10.7	0.9	0.3	5.4	0	0	0	0	0	0	8.3	0	0	2.4	0	380.5	zinc finger with KRAB and SCAN domains 5	23660	protein_coding
ENSG00000185055	EFCAB10			0				6.9	1	0.3		62.2	2		0	25.1355	20.9	18	36.4	0.2	0	0.2	0.4	0.6	0.3	1.6	6.9	0.3	0.2	0.6	0.2	0	0	0	0.4	0	11.1	6.1	113.3	2.1	1.8	1.4	EF-hand calcium binding domain 10	NA	protein_coding
ENSG00000128573	FOXP2			0				3.1	1	0.6			0		0	5.11155	4.5	5.7	5.2	0	0.5	0	0	0.1	0	0	0.2	0.8	3.1	0	0	0	0	0	0	0	0	0.3	0	0	0.9	0	forkhead box P2	93986	protein_coding
ENSG00000214188	ST7-OT4			0				3.9	1	0.8			0		0	4.72692	6.9	2.4	4.9	0	0	0	0	0	0	0	0.5	0	3.9	0	0	0	0	0	0	0	0	0	0.2	0	0	0	ST7 overlapping transcript 4	NA	protein_coding
ENSG00000236338	AC015987.2			0				16.5	1	0.5		32.1	5		0	34.2011	20.3	10	72.3	0.2	6.6	0.2	0.3	0.6	0.2	1.6	2.1	3.2	1	16.5	0.1	0	0	0	0.4	0	53.1	1	9.6	15.2	64.5	18		NA	protein_coding
ENSG00000258227	CLEC5A			0				6	1	3.1			0		0	1.88883	0.4	3.1	2.2	0	0	0	0	0	0	0	0	0	6	0	0	0	0	0	0	0	0	0	0	0.9	0	0	C-type lectin domain family 5, member A	23601	protein_coding
ENSG00000257743	RP11-1220K2.2			0				5.8	1	0.5			0		0	11.6778	15.3	13.5	6.3	0	0	0	0	0	0	0	0	0	5.8	0	0	0	0	0	0	0	0.7	0.8	0.9	0.3	1.5	1.7	Putative inactive maltase-glucoamylase-like protein LOC93432	NA	protein_coding
ENSG00000130226	DPP6			0				2.7	1	0.9			0		0	3.02011	2.8	2.1	4.1	0	0	0	0	0	0	0.2	0	0	2.7	0	0	0	0	0	0	0	0.2	0	0.2	0.6	0	1	dipeptidyl-peptidase 6	1804	protein_coding
ENSG00000216895	AC009403.2			0				1.2	1	0.3			0		0	3.71181	1.4	2.4	7.3	0	0	0	0	0	0	0	1.2	0	0	0	0	0	0.1	0	0	0	0.2	0	0	0	0	0	Protein LOC100506302	100506302	protein_coding
ENSG00000189132	FAM47B			0				3.3	1	0.3			0		0	11.3	12	6.4	15.5	0	0	0	0.1	0	1.3	3.3	0	0	0	0	0	0.6	0	0.1	0	0	0	0	1.4	0	0	0.2	family with sequence similarity 47, member B	170062	protein_coding
ENSG00000171489	SPACA5			0				5.3	1	1.3		1.5	1		0	4.02432	2.8	7.6	1.6	0	0.5	0	0	0	0	0	5.3	0	0	0	0	0	0	0	0	0	0	0	0	1.5	0	0	sperm acrosome associated 5	389852	protein_coding
ENSG00000102007	PLP2			0				1.2	1	0.4			0		0	2.79392	2.4	2.1	3.8	0	0	0	0.1	0	0	0	1.2	0.1	0	0	0	0	0	0	0	0	0	0	0	0.3	0	0	proteolipid protein 2 (colonic epithelium-enriched)	5355	protein_coding
ENSG00000250423	KIAA1210			0				4.8	1	0.4		5.3	1		0	13.1042	10.4	19.7	9.2	0	0	0.3	0	0	0	0.7	0	4.8	0	0	0	0	0.2	0	0	0	5.3	0.5	1.8	0	0	0	KIAA1210	57481	protein_coding
ENSG00000125352	RNF113A			0				2.5	1	0.3			0		0	7.7362	5.9	8.1	9.2	0.2	0	0	0.6	0.1	0	0.5	2.5	0	0	0	0	0	0	0.1	0.1	0	0	0	0.2	0.6	0	0	ring finger protein 113A	7737	protein_coding
ENSG00000165694	FRMD7			0				3.8	1	0.4			0		0	9.82636	7.5	13.5	8.4	0	0	0	0	0	0	0	3.8	0	0	0.3	0	0.1	0	0	0	0	0	0	0	0	0	0.2	FERM domain containing 7	90167	protein_coding
ENSG00000173275	ZNF449			0				2	1	0.5			0		0	4.28586	5.9	2.6	4.3	0	0	0	0	0	0	0	0	2	0	0	0	0	0	0	0	0	0	0	0	0.3	0	0.2	zinc finger protein 449	203523	protein_coding
ENSG00000071553	ATP6AP1			0				2.1	1	0.5		4.1	2		0	4.47909	3.5	4.3	5.7	0	0	0	0	0.1	0	0	2.1	0	0.2	0.3	0	0	0	0	0	0	0.5	0.3	0.2	1.2	0	7	ATPase, H+ transporting, lysosomal accessory protein 1	537	protein_coding
ENSG00000155961	RAB39B			0				1.3	1	2.8			0		0	0.452042	0.4	0.9	0	0	0.4	0	0.2	0	0	0	0	0	0	1.3	0.1	0	0	0	0	0	0	0.3	0	0	0	0	RAB39B, member RAS oncogene family	116442	protein_coding
ENSG00000198363	ASPH			0				8.7	1	0.3		20.9	2		0	33.0016	29.7	31.8	37.5	0.1	0.1	0.6	0.1	0	0	0.1	1	1.6	0	8.7	0	0	0	0	0.1	0	2	20.3	21.6	0.9	0	1.2	aspartate beta-hydroxylase	444	protein_coding
ENSG00000076554	TPD52			0				9.1	1	0.3			0		0	27.779	18.9	29.9	34.5	0	0	0	0	0.1	0	0.1	1.8	9.1	0.3	0.2	0	0	0.4	0	0	0	0.3	0.5	0	0.3	0	0.7	tumor protein D52	7163	protein_coding
ENSG00000147655	RSPO2			0				1.6	1	0.3			0		0	4.82911	5.5	3.6	5.4	0	0	0.2	0	0	0.2	0	0	1.6	0	0	0.1	0	0	0	0	0	0	0	0.4	0	0	0.2	R-spondin 2	340419	protein_coding
ENSG00000129292	PHF20L1			0				134.7	1	0.5		161.5	2		0	276.255	254.2	286.7	287.8	3.5	9.5	1.5	2.2	0.9	0.9	1.4	134.7	2.2	57.9	3.2	0.3	0.9	1.1	0	2.4	0	128.1	3.6	4.4	29.3	195	36.3	PHD finger protein 20-like 1	51105	protein_coding
ENSG00000178031	ADAMTSL1			0				2.7	1	0.3		30.8	2		0	10.3256	7.9	11.6	11.4	0.2	0	0	0.1	0	0	0	0.2	0	2.7	0	0.1	0	0.2	0	0	0	1.2	0.8	0.9	0.3	4.5	57	ADAMTS-like 1	92949	protein_coding
ENSG00000165119	HNRNPK			0				3.6	1	0.4		26.7	4		0	8.31064	12.4	5.5	7.1	0	0.1	0.2	0.1	0.2	0	0	3.6	0	0.2	0.1	0	0	0.2	0	0	0	49.8	10.1	5.7	0.3	41.2	0.5	heterogeneous nuclear ribonucleoprotein K	3190	protein_coding
ENSG00000135052	GOLM1			0				2.2	1	0.3			0		0	7.14729	5.1	9	7.3	0	0.1	0	0	0.1	0.2	0.5	0	0.1	2.2	0	0.1	0	0	0	0	0	0.3	0	0.4	0	0.6	0.7	golgi membrane protein 1	51280	protein_coding
ENSG00000148219	ASTN2			0				5.3	1	0.4		18.8	3		0	14.4677	11.2	12.1	20.1	0	0	0	0	0	0	0	5.3	0	0	0	0	0	0	0	0	0.1	21	3.6	5.7	1.5	29.7	0.2	astrotactin 2	23245	protein_coding
ENSG00000187239	FNBP1			0				4.9	1	0.3		15.2	2		0	16.8968	16.9	14.2	19.6	0.1	0.6	0.2	0.3	0.3	0	0.5	4.9	0	1	1.4	0.1	0	0	0	0.1	0.1	0.8	21.8	8.5	2.1	0.6	1	formin binding protein 1	23048	protein_coding
ENSG00000148291	SURF2			0				1.6	1	0.9			0		0	1.92295	0	3.3	2.4	0	0	0	0	0	0	0	1.6	0	0	0	0	0	0	0	0	0	0	0	0	0.3	0	0.5	surfeit 2	6835	protein_coding
ENSG00000054148	PHPT1			0				1.6	1	0.9			0		0	1.8895	1.2	1.2	3.3	0	0	0	0	0	0	0	1.6	0	0	0.1	0	0	0	0	0	0	0	0	0	0	0	0.2	phosphohistidine phosphatase 1	29085	protein_coding
ENSG00000148483	TMEM236			0				2.2	1	0.3			0		0	8.20144	5.3	7.4	12	0	0	0	0	0	0	0	0	0	0	2.2	0	0	0	0	0	0	0.2	0	0	0	0	0	transmembrane protein 236	653567	protein_coding
ENSG00000095787	WAC			0				51.4	1	0.3			0		0	204.845	201.6	188.2	224.8	0.5	21.4	0.3	0.3	1.1	0.3	51.4	2.8	2.6	3.9	3.4	0.6	0.1	0.2	0.1	0.3	0.2	1	13.4	4.1	9	3.9	32	WW domain containing adaptor with coiled-coil	51322	protein_coding
ENSG00000198915	RASGEF1A			0				6.1	1	1.5			0		0	3.97067	1.2	5	5.7	0	0	0	0	0	0	0	6.1	0	0	0	0	0.1	0.1	0	0	0	0	0	0	0	0	0	RasGEF domain family, member 1A	221002	protein_coding
ENSG00000235931	C10orf40			0				3.5	1	0.3			0		0	12.8185	21.4	11.4	5.7	0.2	0	0	0.1	0	0	0	3.5	1	0.5	0.5	0	0	0	0.2	0	0	0	0	0.2	0	0	0	chromosome 10 open reading frame 40	NA	protein_coding
ENSG00000182180	MRPS16			0				3.1	1	0.4			0		0	7.13725	5.3	6.9	9.2	0	0	0	0	0	0	0	3.1	0.1	0.2	0	0	0	0	0	0	0	0	0	0	0.3	0.3	0.2	mitochondrial ribosomal protein S16	51021	protein_coding
ENSG00000133661	SFTPD			0				1.2	1	0.3			0		0	3.90321	1.4	4	6.3	0	0	0	0.1	0	0.2	0.2	1.2	0	0	0.1	0.1	0	0	0	0	0	0	0.5	0	0.3	0.6	0.2	surfactant protein D	6441	protein_coding
ENSG00000188316	ENO4			0				1.6	1	0.3		145.5	1		0	5.11249	4.1	4.7	6.5	0	0	0	0.1	0	0.1	0	1.6	0	0	0	0	0	0	0	0	0	145.5	0.3	0	0	0.3	0	enolase family member 4	387712	protein_coding
ENSG00000149136	SSRP1			0				2	1	0.5			0		0	4.25334	2	4.7	6	0	0	0	0	0	0	0	0	0	2	0.2	0	0	0	0	0	0	0	0	0.4	0	0	0.2	structure specific recognition protein 1	6749	protein_coding
ENSG00000124939	SCGB2A1			0				9.4	1	0.4			0		0	23.0929	24.4	20.4	24.5	0	0.1	0	0	0.1	0.1	0.1	0.5	0.5	9.4	0.2	0	0	0.2	0.1	0	0.1	0.2	0.8	2.1	3	2.1	0.2	secretoglobin, family 2A, member 1	4246	protein_coding
ENSG00000173113	TRMT112			0				1	1	0.3		62.7	3		0	3.89068	3.3	3.8	4.6	0.6	0	0	0	0.1	0	0.1	0.7	0	1	0	0	0.1	0.3	0	0.2	0	51.2	79.4	0	0	57.5	1	tRNA methyltransferase 11-2 homolog (S. cerevisiae)	51504	protein_coding
ENSG00000137522	RNF121			0				3.1	1	0.3			0		0	10.1468	7.7	8.3	14.4	0	0.1	0	0	0	0	0	3.1	0	0	0	0.1	0	0	0	0	0	0.2	0	0	0	0	0	ring finger protein 121	55298	protein_coding
ENSG00000149972	CNTN5			0				1.3	1	0.4			0		0	3.79032	2.2	2.6	6.5	0	0	0	0	0	0	0	1.3	0	0	0	0	0	0	0	0	0	0	0	0.2	0	0	0.2	contactin 5	53942	protein_coding
ENSG00000154127	UBASH3B			0				5.1	1	0.3			0		0	16.5577	17.3	12.8	19.6	0.1	0	0.8	0.1	0	0	0	5.1	0.2	0.9	0	0	0	0	0	0	0	0.2	0	0	0.9	0	0.2	ubiquitin associated and SH3 domain containing B	84959	protein_coding
ENSG00000151062	CACNA2D4			0				1.3	1	0.4		1.2	1		0	3.41672	1	3.8	5.4	0	0	0	0	0	0.1	0	1.3	0	0	0	0	0	0	0.3	0	0	0.2	0	0	0.9	1.2	0.5	calcium channel, voltage-dependent, alpha 2/delta subunit 4	93589	protein_coding
ENSG00000111642	CHD4			0				13.3	1	0.4		16.2	2		0	36.1459	29.9	37.5	41	0	1	0	0	0.1	0	0	0.2	0.8	13.3	0.3	0	1.7	0	0.3	0.3	0	1.2	21.6	1.2	2.4	10.9	0.5	chromodomain helicase DNA binding protein 4	1108	protein_coding
ENSG00000150045	KLRF1			0				17.5	1	0.3			0		0	56.7923	83.4	43	44	0.6	0.3	0	1.4	0.5	2	0.2	17.5	3.4	0	1.6	0	0.1	0.3	0	0.4	0	1.8	0	0.5	0.6	1.5	2.2	killer cell lectin-like receptor subfamily F, member 1	51348	protein_coding
ENSG00000111215	PRR4			0				1.6	1	0.3		1574.7	6		0	6.04964	6.3	6.4	5.4	0.2	0	0	0	0	0.3	0	1.6	0	0.3	0	0	0	0	0	0	0	2630.9	5583.6	1147.1	66.9	11.5	8.4	proline rich 4 (lacrimal)	11272	protein_coding
ENSG00000273079	GRIN2B			0				3.6	1	0.6			0		0	6.38823	5.3	9.3	4.6	0	0	0	0	0	0	0	3.6	0	0	0.1	0	0	0	0	0	0	0	0	0.4	0.3	0	0	glutamate receptor, ionotropic, N-methyl D-aspartate 2B	2904	protein_coding
ENSG00000070019	GUCY2C			0				2.3	1	0.3			0		0	7.94975	9.6	6.4	7.9	0	0	0	0	0	0	0	2.3	0	0	0	0	0	0	0	0	0	0.3	0.3	0	0.6	0.3	0	guanylate cyclase 2C (heat stable enterotoxin receptor)	2984	protein_coding
ENSG00000231738	TSPAN19			0				6.3	1	0.6			0		0	10.7849	15.7	10.4	6.3	0	0.9	0.3	0.1	0	0	0	6.3	0	0.3	0.9	0.1	0.6	0	0	0	0	0	0	0	0.9	0	0	tetraspanin 19	144448	protein_coding
ENSG00000049130	KITLG			0				2.6	1	1.4			0		0	1.8217	1	1.2	3.3	0	0	0	0	0	0	0	0	0	0	2.6	0	0	0	0	0	0	0	0	0	0	0	0	KIT ligand	4254	protein_coding
ENSG00000111783	RFX4			0				6.1	1	0.4		5.4	1		0	13.9787	14	11.9	16	0	0	0	0	0.1	0.1	0	6.1	0	0	0	0.1	0	0	0	0	0	0	0	1.1	0.3	5.4	1	regulatory factor X, 4 (influences HLA class II expression)	5992	protein_coding
ENSG00000122970	IFT81			0				46.7	1	0.4		994	2		0	120.355	133	108.5	119.6	1	5.8	0.6	0.7	0.5	0.5	0.8	7.6	1.3	46.7	6.5	0.1	0.4	1	0.1	18.6	0.1	27.4	663.9	1324	1.8	0.9	1	intraflagellar transport 81 homolog (Chlamydomonas)	28981	protein_coding
ENSG00000158104	HPD			0				1.2	1	0.4			0		0	3.20141	1.4	3.6	4.6	0	0	0	0	0	0	0	1.2	0	0	0	0	0	0	0	0	0	0	0	0.2	0	0	0	4-hydroxyphenylpyruvate dioxygenase	3242	protein_coding
ENSG00000127863	TNFRSF19			0				2	1	0.3			0		0	6.80881	4.7	7.6	8.2	0	0	0	0	0	0	0.1	2	0	0	0	0	0	0	0	0	0	0	0	0	0.3	0	0	tumor necrosis factor receptor superfamily, member 19	55504	protein_coding
ENSG00000075673	ATP12A			0				7.1	1	0.8			0		0	8.51724	9.2	5	11.4	0	0	0	0	0	0	0	7.1	0	0	0	0	0	0	0	0.5	0	0	0	0	0	0	0.7	ATPase, H+/K+ transporting, nongastric, alpha polypeptide	479	protein_coding
ENSG00000120659	TNFSF11			0				2	1	1			0		0	2.00162	1	3.1	1.9	0	0	0	0	0	0	0	0	0	2	0	0	0	0.1	0	0	0	0	0	0	0.6	0	0.2	tumor necrosis factor (ligand) superfamily, member 11	8600	protein_coding
ENSG00000179813	FAM216B			0				1.3	1	0.4			0		0	3.29028	2.4	5	2.4	0	0	0	0	0	0	0	0	0.8	0	1.3	0	0	0	0	0	0	0	0	0	0	0	0	family with sequence similarity 216, member B	144809	protein_coding
ENSG00000152207	CYSLTR2			0				3.2	1	0.5			0		0	5.85674	4.5	9	4.1	0	0	0	0	0	0	0	0	3.2	0	0	0	0	0	0	0	0	0	0.3	0	0.3	0	0	cysteinyl leukotriene receptor 2	57105	protein_coding
ENSG00000129493	HEATR5A			0				8.9	1	0.3		177.8	2		0	29.0992	23	32.5	31.8	0	0	0	0.1	0.5	0	0.9	8.9	2.5	3.1	0	0.8	0	1.6	0	0	0	6.1	0.8	0.7	2.4	194.3	161.3	HEAT repeat containing 5A	25938	protein_coding
ENSG00000182400	TRAPPC6B			0				5.3	1	0.8		3.4	1		0	6.79711	7.5	5	7.9	0	0.4	0	0	0	0	0.3	5.3	0	0	0.3	0	0	0	0	0	0	0.7	0.3	3.4	0.3	0.6	0	trafficking protein particle complex 6B	122553	protein_coding
ENSG00000180008	SOCS4			0				1.5	1	0.3			0		0	5.88949	10.2	4.5	3	0	0	0	0	0	0	0	0	0	1.5	0	0	0	0	0	0	0	0	0	0.2	0	0	0.2	suppressor of cytokine signaling 4	122809	protein_coding
ENSG00000165898	ISCA2			0				2.9	1	0.3			0		0	8.96084	5.5	6.2	15.2	0.1	0	0.2	0	0	0	0	0	0.1	2.9	0	0.2	0	0.5	0	0	0	0.8	0	0	0	0	0	iron-sulfur cluster assembly 2	122961	protein_coding
ENSG00000170054	SERPINA9			0				8.9	1	6.8			0		0	1.26636	2.2	0.5	1.1	0	0	0	0	0	0	0	8.9	0	0	0	0	0	0	0	0	0	0	0	0	0	0	0	serpin peptidase inhibitor, clade A (alpha-1 antiproteinase, antitrypsin), member 9	327657	protein_coding
ENSG00000169857	AVEN			0				3.1	1	0.4		6.6	1		0	7.76688	7.5	11.2	4.6	0	0.1	0.2	0	0	0.1	0	3.1	0	0	0.7	0	0	0	0	0	0.1	0.2	0	0	6.6	0	0	apoptosis, caspase activation inhibitor	57099	protein_coding
ENSG00000212768	AC114546.1			0				1.4	1	1.2			0		0	1.20989	1.8	0.7	1.1	0	0	0	0	0	0.1	0	0.5	1.4	0	0	0	0	0	0	0	0	0	0	0	0	0	0	HCG37415; PRO1914; Uncharacterized protein	NA	protein_coding
ENSG00000137860	SLC28A2			0				2.6	1	0.7			0		0	3.82299	1.6	5.2	4.6	0	0	0	0	0	0.2	0	0	2.6	0	0	0	0	0	0	0	0	0	0	0	0	0	0	solute carrier family 28 (concentrative nucleoside transporter), member 2	9153	protein_coding
ENSG00000188467	SLC24A5			0				2	1	0.3		52.7	2		0	7.36	7.7	9.7	4.6	1	0.5	0	0.1	0.2	0.6	2	0.2	0.2	1.5	1.4	0.1	0.1	0	0	0	0	1.3	0.5	1.6	103.1	0.3	2.4	solute carrier family 24 (sodium/potassium/calcium exchanger), member 5	283652	protein_coding
ENSG00000138593	SECISBP2L			0				19.3	1	0.3			0		0	71.8178	79.3	67.6	68.5	0	1.7	0	0.1	0	0	1.7	19.3	0	0.5	0.7	0	0	0.3	0	0	0	0.3	0	2.3	2.7	5.8	0	SECIS binding protein 2-like	9728	protein_coding
ENSG00000137869	CYP19A1			0				1.1	1	0.6			0		0	1.84306	0.6	3.6	1.4	0	0	0	0	0	0	0	0	1.1	0	0	0	0	0.1	0	0	0	0	0.3	0	0	0	0	cytochrome P450, family 19, subfamily A, polypeptide 1	1588	protein_coding
ENSG00000166803	KIAA0101			0				4.1	1	0.3			0		0	12.9257	18.3	6.9	13.6	0	0	0	0	0	0.4	0.7	1.2	0.1	0	4.1	0	0.1	0	0	0	0	0	0	0	0	0	0	KIAA0101	9768	protein_coding
ENSG00000187720	THSD4			0				3.3	1	0.7		8.4	1		0	4.63798	4.3	2.8	6.8	0	0	0	0	0	0	0	3.3	0	0	0.2	0	0	0	0	0	0	0.2	0.3	0	8.4	0.3	0.7	thrombospondin, type I, domain containing 4	79875	protein_coding
ENSG00000169752	NRG4			0				1.2	1	0.5			0		0	2.54631	0.8	1.7	5.2	0	0	0	0	0	0	0	0	0.9	0	1.2	0	0	0	0	0	0	0	0	0	0	0	0	neuregulin 4	145957	protein_coding
ENSG00000156218	ADAMTSL3			0				19.5	1	0.5			0		0	40.5701	41.1	30.6	50	0.1	0	0	0.1	0	0	0	0	0.1	0.7	19.5	0	0	0	0	0	0.2	0.3	0	0.2	3.3	0	0	ADAMTS-like 3	57188	protein_coding
ENSG00000167981	ZNF597			0				3.1	1	0.4			0		0	7.12409	3.3	11.9	6.3	0	0	0	0.4	0	0	0	0	0	3.1	0	0	0	0	0	0	0	0	0	0	0	0	0	zinc finger protein 597	146434	protein_coding
ENSG00000155592	ZKSCAN2			0				8.2	1	0.7			0		0	11.5439	7.5	19.2	7.9	0	0	0	0	0	0	0	8.2	0	0	0.7	0	0.1	0	0	0.1	0	0	0	0.4	0	0.3	0	zinc finger with KRAB and SCAN domains 2	342357	protein_coding
ENSG00000109063	MYH3			0				2.8	1	0.3			0		0	9.14985	5.7	11.2	10.6	0	0	0	0	0	0	0	2.8	1.2	0.2	0	0	0	0	0	0	0	0.2	0	0	0.9	0	0.2	myosin, heavy chain 3, skeletal muscle, embryonic	4621	protein_coding
ENSG00000108256	NUFIP2			0				2.3	1	0.5			0		0	4.86555	3.3	2.4	9	0	0	0	0.2	0	0	0	2.3	0	0	0	0.9	0	0	0	0	0	0.3	0	0	0.3	0.3	0.2	nuclear fragile X mental retardation protein interacting protein 2	57532	protein_coding
ENSG00000178852	EFCAB13			0				6.1	1	0.3		167.7	4		0	18.1466	20.7	20.6	13	0.2	0	0	0.2	0.8	0	0	6.1	0	0	0.8	0	0	0.1	0	0.1	0	35.5	39.6	522	73.5	0.3	1.7	EF-hand calcium binding domain 13	124989	protein_coding
ENSG00000108387	2015-09-04			0				132.2	1	0.6		142.5	4		0	233.859	157.6	237.1	306.9	1	1.5	0	15	0.6	0.3	2.1	6.6	1.7	132.2	7.5	1	1	1.4	0.1	0.3	0.2	73.4	134.9	193.4	24.5	17	168.5	septin 4	5414	protein_coding
ENSG00000070495	JMJD6			0				4.8	1	0.7			0		0	7.20161	7.5	9.7	4.3	0	0.3	0	0.3	0	0	0	0	0	4.8	0	0	0	0	0	0	0	0.2	0	0	0	0	0.2	jumonji domain containing 6	23210	protein_coding
ENSG00000215474	SKOR2			0				4.1	1	0.7			0		0	5.86839	4.7	8.3	4.6	0	0	0	0	0	0	4.1	0	0.1	0	0.9	0	0	0.1	0	0.1	0	0	0.5	0	0	0	0	SKI family transcriptional corepressor 2	652991	protein_coding
ENSG00000081923	ATP8B1			0				3.8	1	0.5			0		0	7.89276	8.5	8.1	7.1	0	0.1	0	0	0	0	0	3.8	0.1	0.2	0	0.2	0	0.1	0	0.3	0	0.3	0.3	0.2	0.6	0	0	ATPase, aminophospholipid transporter, class I, type 8B, member 1	5205	protein_coding
ENSG00000134443	GRP			0				2.2	1	1			0		0	2.19369	1.8	2.8	1.9	0	0	0	0	0.1	0	0	0.3	0	2.2	0	0	0	0	0	0	0	0	0	0	0.3	0	0.7	gastrin-releasing peptide	2922	protein_coding
ENSG00000170677	SOCS6			0				3.5	1	0.3		52.2	2		0	12.1358	7.3	15	14.1	0	0	0	0	0	0	0	3.5	0.2	0	0.4	0	0	0	0	0	0	2.3	0.5	3.9	1.5	0.9	100.5	suppressor of cytokine signaling 6	9306	protein_coding
ENSG00000149443	C20orf78			0				4.6	1	1.2			0		0	3.93716	0.8	4.7	6.3	0	0	0	0	0	0	0	4.6	0	0	0	0	0	0	0	0	0	0	0	0	0.3	0	0	chromosome 20 open reading frame 78	100128496	protein_coding
ENSG00000080839	RBL1			0				1.8	1	0.7		332.3	4		0	2.53223	3.9	2.4	1.4	0	0	0	0	0	0	0	1.8	0	0	0	0	0	0	0	0	0	20.5	0	1257.9	3.9	0.9	46.9	retinoblastoma-like 1 (p107)	5933	protein_coding
ENSG00000124157	SEMG2			0				1.6	1	1.8			0		0	0.904585	1.4	0.5	0.8	0	0	0.2	0	0	0	0	1.6	0	0	0	0	0	0	0	0	0	0	0	0	0	0	0.7	semenogelin II	6407	protein_coding
ENSG00000171105	INSR			0				3.6	1	0.4			0		0	8.06319	6.3	9.7	8.2	0.2	0.8	0	0.1	0	0	0.5	0	0	3.6	0	0.3	0	0	0	0.4	0	0.2	0.3	0	0.3	0	0	insulin receptor	3643	protein_coding
ENSG00000198342	ZNF442			0				3.9	1	0.5		171.7	4		0	7.73206	14.8	4.3	4.1	0	0	0.2	0	0	0	0	0	0	0	3.9	0.1	0	0	0	0	0	19.8	0.3	0	49	452	166.1	zinc finger protein 442	79973	protein_coding
ENSG00000123136	DDX39A			0				1.8	1	0.5		3.4	1		0	3.42621	3.3	4	3	0	0	0	0	0	0	0.2	1.8	0	0.2	0	0	0	0	0	0	0	0	0	0.5	0.3	0	3.4	DEAD (Asp-Glu-Ala-Asp) box polypeptide 39A	10212	protein_coding
ENSG00000099797	TECR			0				1.2	1	0.3		421.2	4		0	3.44901	3.1	4	3.3	0	0	0	0	0	0.1	0	1.2	0	0	0	0	0	0	0	0	0	28.4	0.8	1.2	0.3	1431.3	223.8	trans-2,3-enoyl-CoA reductase	9524	protein_coding
ENSG00000127530	OR7C1			0				1.3	1	0.3			0		0	3.97845	4.5	6.6	0.8	0	0.8	0	0	0	0	0	0	0	0	1.3	0	0	0.1	0	0	0	0	0	0.2	0.3	0	0	olfactory receptor, family 7, subfamily C, member 1	26664	protein_coding
ENSG00000064607	SUGP2			0				2.6	1	0.4			0		0	6.99977	5.7	8.8	6.5	0	0.1	0	0	0	0	0.4	2.6	0	1.2	0	0	0.3	0.3	0	0	0	0.2	0	0	1.2	0	0.5	SURP and G patch domain containing 2	10147	protein_coding
ENSG00000213996	TM6SF2			0				1.2	1	0.8		3.9	1		0	1.51546	1	1.9	1.6	0	0.4	0	0	0	0	0.1	1.2	0	0	0.4	0	0	0	0	0	0	0	0	0	0.9	3.9	0.2	transmembrane 6 superfamily member 2	53345	protein_coding
ENSG00000198521	ZNF43			0				10.6	1	0.8			0		0	12.8028	14.6	8.5	15.2	0	0	0	0	0.4	0.1	0	10.6	0.3	1.5	0	0	0	0.1	0	0	0	0.2	0	1.2	1.5	0.6	0	zinc finger protein 43	7594	protein_coding
ENSG00000167380	ZNF226			0				35.6	1	0.3			0		0	140.617	132.2	141	148.7	0.7	0.5	0	0.6	0.4	1.4	0.3	35.6	1.8	0.5	0.6	0	0.4	0.3	0.1	0.8	0.3	3	1	0.2	3.3	0.3	7	zinc finger protein 226	7769	protein_coding
ENSG00000178150	ZNF114			0				1.5	1	0.5			0		0	3.24585	4.3	1.7	3.8	0	0	0	0	0	0	0	0	1.5	0	0	0	0	0	0	0	0	0.2	0	0	0	0	0	zinc finger protein 114	163071	protein_coding
ENSG00000167759	KLK13			0				1.5	1	0.6			0		0	2.51003	3.3	2.4	1.9	0	0	0	0	0	0	0	1.5	0	0	0	0	0	0	0	0	0	0.2	0	0	0	0	0.7	kallikrein-related peptidase 13	26085	protein_coding
ENSG00000142556	ZNF614			0				24.3	1	0.7			0		0	33.8532	42.7	30.9	28	0	0	0	0.2	0.2	0	0.1	0.2	24.3	0	0	0	0	0.1	0	0.1	0	0.2	0.8	0.2	0.9	0	1.4	zinc finger protein 614	80110	protein_coding
ENSG00000198538	ZNF28			0				1.3	1	1		10.9	1		0	1.25593	0.4	1.2	2.2	0	0	0	0	0	0	0	1.3	0	0	0	0	0	0	0	0	0	10.9	0	0.2	0	0	0.2	zinc finger protein 28	7576	protein_coding
ENSG00000223638	RFPL4A			0				1.9	1	0.4			0		0	4.38832	3.3	4.7	5.2	0	0	0	0.1	0	0	0	0	0.1	0	1.9	0	0	0	0	0	0	0	0	0.4	0	0	0.5	ret finger protein-like 4A	342931	protein_coding
ENSG00000256060	TRAPPC2P1			0				2.2	1	0.4			0		0	6.17547	5.7	5.2	7.6	0	0	0	0	0.1	0	0	1.2	0	2.2	0	0.1	0	0	0	0	0	0	0	0	1.5	0	0	trafficking protein particle complex 2 pseudogene 1	6399	protein_coding
ENSG00000171649	ZIK1			0				2.8	1	0.3			0		0	8.83306	5.3	11.2	10.1	0	0	0	0	0	0	0	2.8	0	0	0	0	0	0.2	0	0	0.1	0	0	0	0.3	0.3	2.2	zinc finger protein interacting with K protein 1	284307	protein_coding
ENSG00000198131	ZNF544			0				1.5	1	0.5			0		0	3.2008	2.2	3.6	3.8	0	0	0	0	0	0.2	0	1.5	0	0.2	0	0.1	0	0	0	0	0	0	0	0.7	0.9	0	0	zinc finger protein 544	27300	protein_coding
ENSG00000099954	CECR2			0				1.3	1	0.9			0		0	1.48107	2.6	0.7	1.1	0	0	0	0.1	0	0	0	1.3	0	0	0	0	0	0	0	0	0	0.7	0	0	0	0	0	cat eye syndrome chromosome region, candidate 2	27443	protein_coding
ENSG00000159873	CCDC117			0				4.1	1	0.3			0		0	14.1368	9.2	18	15.2	0	0	0	0	0	0	0	4.1	0	0	0.2	0	0	0.1	0	0	0	0	0.3	0.2	0.3	0.6	0	coiled-coil domain containing 117	150275	protein_coding
ENSG00000198089	SFI1			0				2	1	1.6			0		0	1.25515	1	1.7	1.1	0	0	0	0	0	0	0	2	0	0	0	0	0	0	0	0	0	0	0	0.2	0	0	0.2	Sfi1 homolog, spindle assembly associated (yeast)	9814	protein_coding
ENSG00000100413	POLR3H			0				1.3	1	0.6		318.9	2		0	2.13738	1.6	2.6	2.2	0	0	0	0	0.1	0	0	1.3	0.1	0	0.1	0	0	0	0	0	0.1	10.6	0	0.2	627.2	0.3	1	polymerase (RNA) III (DNA directed) polypeptide H (22.9kD)	171568	protein_coding
ENSG00000156261	CCT8			0				223.9	1	0.5		374.6	1		0	423.417	595.5	380.9	293.8	6	15.1	1.1	4.4	3.1	1.2	5	37.8	223.9	8.4	4	1.7	0.6	3.5	0.6	1.6	0.3	94.4	374.6	26.9	77.1	3.9	6.2	chaperonin containing TCP1, subunit 8 (theta)	10694	protein_coding
ENSG00000142166	IFNAR1			0				6.8	1	0.9			0		0	7.30291	8.1	10	3.8	0	0	0.8	0	0.3	0.2	6.8	0	1.1	1.4	0.5	0	0	0.2	0	0	0	1.2	0	0.9	1.8	0.6	0.2	interferon (alpha, beta and omega) receptor 1	3454	protein_coding
ENSG00000160180	TFF3			0				1	1	3.3		80.7	3		0	0.271791	0	0	0.8	0	0	0	0	0	0	0	0	0	1	0	0	0	0	0	0	0	7.3	0	0.5	216.9	0.6	17.8	trefoil factor 3 (intestinal)	7033	protein_coding
ENSG00000160285	LSS			0				2.4	1	0.3		99.3	1		0	8.3351	9.6	5.9	9.5	0.3	0	0	0	0.1	0	0	0.3	0	0.2	2.4	0	0	0.4	0	0	0	1.7	0.3	0	0.9	0.9	99.3	lanosterol synthase (2,3-oxidosqualene-lanosterol cyclase)	4047	protein_coding
ENSG00000212907	MT-ND4L			0				3.7	1	0.3		5.8	3		0	13.9108	15.3	10.4	16	0.2	0.6	0	0.1	3.3	0.1	0.5	0.5	0.8	3.7	0.9	0	0	0	0	0.3	0	4.5	6.8	1.9	6	2.4	3.1	mitochondrially encoded NADH dehydrogenase 4L	4539	protein_coding
ENSG00000186092	OR4F5			0					0				0		0	0	0	0	0	0	0	0	0	0	0	0	0	0	0	0	0	0	0	0	0	0	0	0	0	0.3	0	0	olfactory receptor, family 4, subfamily F, member 5	79501	protein_coding
ENSG00000237683	AL627309.1			0					0				0		0	0	0	0	0	0	0	0	0	0	0	0	0	0	0	0	0	0	0	0	0	0	0	0	0	0	0	0	Uncharacterized protein	728728	protein_coding
ENSG00000235249	OR4F29			0					0				0		0	0.418532	0	0.7	0.5	0	0	0	0	0	0	0	0	0	0	0	0	0	0	0	0	0	0	0	0	0	0	0	olfactory receptor, family 4, subfamily F, member 29	26683	protein_coding
ENSG00000185097	OR4F16			0					0				0		0	4.42433	2	3.1	8.2	0	0	0	0	0	0	0	0	0	0	0	0	0	0	0	0	0	0.8	0	0.9	0	0	0.5	olfactory receptor, family 4, subfamily F, member 16	26683	protein_coding
ENSG00000269831	AL669831.1			0					0				0		0	0	0	0	0	0	0	0	0	0	0	0	0	0	0	0	0	0	0	0	0	0	0	0	0	0	0	0	Uncharacterized protein	NA	protein_coding
ENSG00000269308	AL645608.2			0					0				0		0	0	0	0	0	0	0	0	0	0	0	0	0	0	0	0	0	0	0	0	0	0	0	0	0	0	0	0		NA	protein_coding
ENSG00000187634	SAMD11			0					0				0		0	0	0	0	0	0	0	0	0	0	0	0	0	0	0	0	0	0	0	0	0	0	0.2	0	0	0	0	0	sterile alpha motif domain containing 11	148398	protein_coding
ENSG00000268179	AL645608.1			0					0				0		0	0	0	0	0	0	0	0	0	0	0	0	0	0	0	0	0	0	0	0	0	0	0	0	0	0	0	0	Uncharacterized protein	NA	protein_coding
ENSG00000188976	NOC2L			0					0				0		0	0	0	0	0	0	0	0	0	0	0	0	0	0	0	0	0	0	0	0	0	0	0	0	0	0	0	0	nucleolar complex associated 2 homolog (S. cerevisiae)	26155	protein_coding
ENSG00000187961	KLHL17			0					0				0		0	0	0	0	0	0	0	0	0	0	0	0	0	0	0	0	0	0	0	0	0	0	0	0.3	0	0	0	0	kelch-like family member 17	339451	protein_coding
ENSG00000187583	PLEKHN1			0					0				0		0	0	0	0	0	0	0	0	0	0	0	0	0	0	0	0	0	0	0	0	0	0	0	0.5	0	0	0	0	pleckstrin homology domain containing, family N member 1	84069	protein_coding
ENSG00000187642	C1orf170			0					0				0		0	0	0	0	0	0	0	0	0	0	0	0	0	0	0	0	0	0	0	0	0	0	0	0	0	0	0	0	chromosome 1 open reading frame 170	84808	protein_coding
ENSG00000188290	HES4			0					0				0		0	0	0	0	0	0	0	0	0	0	0	0	0	0	0	0	0	0	0	0	0	0	0	0	0	0	0	0	hes family bHLH transcription factor 4	57801	protein_coding
ENSG00000187608	ISG15			0					0				0		0	0	0	0	0	0	0	0	0	0	0	0	0	0	0	0	0	0	0	0	0	0	0	0	0.2	0	0	0	ISG15 ubiquitin-like modifier	9636	protein_coding
ENSG00000188157	AGRN			0					0				0		0	0	0	0	0	0	0	0	0	0	0	0	0	0	0	0	0	0	0	0	0	0	0.5	0.8	0.5	0.3	0	0.5	agrin	375790	protein_coding
ENSG00000237330	RNF223			0					0				0		0	0	0	0	0	0	0	0	0	0	0	0	0	0	0	0	0	0	0	0	0	0	0.2	0	0	0	0	0.2	ring finger protein 223	401934	protein_coding
ENSG00000131591	C1orf159			0					0				0		0	0	0	0	0	0	0	0	0	0	0	0	0	0	0	0	0	0	0	0	0	0	0	0	0	0	0.3	0	chromosome 1 open reading frame 159	54991	protein_coding
ENSG00000162571	TTLL10			0					0			3.6	1		0	0	0	0	0	0	0	0	0	0	0	0	0	0	0	0	0	0	0	0	0	0	0.3	3.6	0	0.3	0.6	0.2	tubulin tyrosine ligase-like family, member 10	254173	protein_coding
ENSG00000186891	TNFRSF18			0					0				0		0	0	0	0	0	0	0	0	0	0	0	0	0	0	0	0	0	0	0	0	0	0	0.2	0	0	0	0	0	tumor necrosis factor receptor superfamily, member 18	8784	protein_coding
ENSG00000186827	TNFRSF4			0					0				0		0	0	0	0	0	0	0	0	0	0	0	0	0	0	0	0	0	0	0	0	0	0	0	0.5	0	0	0.3	0	tumor necrosis factor receptor superfamily, member 4	7293	protein_coding
ENSG00000078808	SDF4			0					0				0		0	0	0	0	0	0	0	0	0	0	0	0	0	0	0	0	0	0	0	0	0	0	0	0.5	0.2	0.3	0	0	stromal cell derived factor 4	51150	protein_coding
ENSG00000176022	B3GALT6			0					0				0		0	0	0	0	0	0	0	0	0	0	0	0	0	0	0	0	0	0	0	0	0	0	0	0.3	0	0	0	0.5	UDP-Gal:betaGal beta 1,3-galactosyltransferase polypeptide 6	126792	protein_coding
ENSG00000184163	FAM132A			0					0				0		0	0	0	0	0	0	0	0	0	0	0	0	0	0	0	0	0	0	0	0	0	0	0	0	0	0	0	0	family with sequence similarity 132, member A	388581	protein_coding
ENSG00000160087	UBE2J2			0					0				0		0	0.678564	1.2	0	0.8	0	0	0	0	0	0	0	0	0	0	0	0	0	0	0	0	0	0	0	0.2	0	0	0	ubiquitin-conjugating enzyme E2, J2	118424	protein_coding
ENSG00000162572	SCNN1D			0					0				0		0	0	0	0	0	0	0	0	0	0	0	0	0	0	0	0	0	0	0	0	0	0	0	0.3	0	0	0	0.2	sodium channel, non-voltage-gated 1, delta subunit	6339	protein_coding
ENSG00000131584	ACAP3			0					0			1.2	1		0	0	0	0	0	0	0	0	0	0	0	0	0	0	0	0	0	0	0	0	0	0	0.2	0	0	0.3	1.2	0	ArfGAP with coiled-coil, ankyrin repeat and PH domains 3	116983	protein_coding
ENSG00000169972	PUSL1			0					0				0		0	0	0	0	0	0	0	0	0	0	0	0	0	0	0	0	0	0	0	0	0	0	0	0	0.2	0	0	0	pseudouridylate synthase-like 1	126789	protein_coding
ENSG00000127054	CPSF3L			0					0				0		0	0	0	0	0	0	0	0	0	0	0	0	0	0	0	0	0	0	0	0	0	0	0.2	0.3	0	0.9	0	0	cleavage and polyadenylation specific factor 3-like	54973	protein_coding
ENSG00000224051	GLTPD1			0					0				0		0	0	0	0	0	0	0	0	0	0	0	0	0	0	0	0	0	0	0	0	0	0	0	0	0	0	0	0	glycolipid transfer protein domain containing 1	80772	protein_coding
ENSG00000169962	TAS1R3			0					0			1.3	1		0	0	0	0	0	0	0	0	0	0	0	0	0	0	0	0	0	0	0	0	0	0	1.3	0.3	0.2	0.6	0	0	taste receptor, type 1, member 3	83756	protein_coding
ENSG00000107404	DVL1			0					0			1.5	1		0	0	0	0	0	0	0	0	0	0	0	0	0	0	0	0	0	0	0	0	0	0	0	0	0.2	1.5	0.6	0	dishevelled segment polarity protein 1	1855	protein_coding
ENSG00000162576	MXRA8			0					0				0		0	0	0	0	0	0	0	0	0	0	0	0	0	0	0	0	0	0	0	0	0	0	0	0	0.2	0.3	0.6	0.2	matrix-remodelling associated 8	54587	protein_coding
ENSG00000175756	AURKAIP1			0					0			1.5	1		0	0.0677956	0.2	0	0	0	0	0	0	0	0	0	0	0	0	0	0	0	0	0	0	0	0	0	0	1.5	0.3	0	aurora kinase A interacting protein 1	54998	protein_coding
ENSG00000221978	CCNL2			0					0				0		0	4.82932	2.6	6.4	5.4	0	0	0	0	0	0	0	0	0.2	1	0	0.2	0	0.1	0	0.1	0	0	0	0	0.3	0.6	0.5	cyclin L2	81669	protein_coding
ENSG00000224870	RP4-758J18.2			0					0				0		0	0	0	0	0	0	0	0	0	0	0	0	0	0	0	0	0	0	0	0	0	0	0	0	0	0	0	0	HCG20425, isoform CRA_a; Uncharacterized protein; cDNA FLJ53815	NA	protein_coding
ENSG00000242485	MRPL20			0					0				0		0	14.9302	10.4	15.7	18.8	0	0.1	0	0	0	0.1	0.3	0.2	0.2	0	0.4	0.2	0.3	0.1	0	0	0	0.2	0	0.9	0.6	0	0	mitochondrial ribosomal protein L20	55052	protein_coding
ENSG00000235098	ANKRD65			0					0				0		0	0	0	0	0	0	0	0	0	0	0	0	0	0	0	0	0	0	0	0	0	0	0	0.3	0.4	0.3	0	0	ankyrin repeat domain 65	441869	protein_coding
ENSG00000205116	TMEM88B			0					0				0		0	0	0	0	0	0	0	0	0	0	0	0	0	0	0	0	0	0	0	0	0	0	0	0	0	0	0	0.2	transmembrane protein 88B	643965	protein_coding
ENSG00000179403	VWA1			0					0				0		0	0	0	0	0	0	0	0	0	0	0	0	0	0	0	0	0	0	0	0	0	0	0.2	0	0.4	0	0	0.2	von Willebrand factor A domain containing 1	64856	protein_coding
ENSG00000215915	ATAD3C			0					0				0		0	0	0	0	0	0	0	0	0	0	0	0	0	0	0	0	0	0	0	0	0	0	0	0	0	0.3	0	0	ATPase family, AAA domain containing 3C	219293	protein_coding
ENSG00000160072	ATAD3B			0					0				0		0	0	0	0	0	0	0	0	0	0	0	0	0	0	0	0	0	0	0	0	0	0	0.3	0.3	0	0	0	0	ATPase family, AAA domain containing 3B	83858	protein_coding
ENSG00000197785	ATAD3A			0					0				0		0	0	0	0	0	0	0	0	0	0	0	0	0	0	0	0	0	0	0	0	0	0	0.5	0.3	0.2	0	0	0	ATPase family, AAA domain containing 3A	55210	protein_coding
ENSG00000205090	TMEM240			0					0				0		0	0	0	0	0	0	0	0	0	0	0	0	0	0	0	0	0	0	0	0	0	0	0	0	0	0	0.3	0	transmembrane protein 240	339453	protein_coding
ENSG00000160075	SSU72			0					0			35	2		0	10.9131	13.2	7.8	11.7	0	0	0.2	0	0	0	0	0	0	0	0	0	0.1	0	0.1	0	0	38.5	0.3	0.2	0.3	0.3	31.5	SSU72 RNA polymerase II CTD phosphatase homolog (S. cerevisiae)	29101	protein_coding
ENSG00000215014	AL645728.1			0					0				0		0	0	0	0	0	0	0	0	0	0	0	0	0	0	0	0	0	0	0	0	0	0	0	0	0	0	0	0	Uncharacterized protein	NA	protein_coding
ENSG00000228594	C1orf233			0					0				0		0	0	0	0	0	0	0	0	0	0	0	0	0	0	0	0	0	0	0	0	0	0	0	0	0	0	0	0	chromosome 1 open reading frame 233	643988	protein_coding
ENSG00000197530	MIB2			0					0			1.3	1		0	0	0	0	0	0	0	0	0	0	0	0	0	0	0	0	0	0	0	0	0	0	0.5	1.3	0.4	0	0	1	mindbomb E3 ubiquitin protein ligase 2	142678	protein_coding
ENSG00000189409	MMP23B			0					0				0		0	0	0	0	0	0	0	0	0	0	0	0	0	0	0	0	0	0	0	0	0	0	0	0	0.2	0.3	0	0.2	matrix metallopeptidase 23B	8510	protein_coding
ENSG00000248333	CDK11B			0					0				0		0	7.05918	3.5	7.1	10.6	0	0	0	0	0	0.1	0	0	0	0	0.1	0	0	0	0	0	0.1	0.3	0	0	0.6	0	0	cyclin-dependent kinase 11B	984	protein_coding
ENSG00000189339	SLC35E2B			0					0				0		0	0	0	0	0	0	0	0	0	0	0	0	0	0	0	0	0	0	0	0	0	0	0.2	0.3	0	0	0	0	solute carrier family 35, member E2B	728661	protein_coding
ENSG00000008128	CDK11A			0					0				0		0	4.57019	4.1	2.8	6.8	0	0	0	0.1	0	0.3	0	0	0	0	0.1	0	0	0	0	0	0	0.3	0	0	0.3	0	0	cyclin-dependent kinase 11A	984	protein_coding
ENSG00000215790	SLC35E2			0					0				0		0	0	0	0	0	0	0	0	0	0	0	0	0	0	0	0	0	0	0	0	0	0	0	0	0	0	0	0	solute carrier family 35, member E2	9906	protein_coding
ENSG00000008130	NADK			0					0				0		0	0	0	0	0	0	0	0	0	0	0	0	0	0	0	0	0	0	0	0	0	0	0	0	0	0	0	0.2	NAD kinase	65220	protein_coding
ENSG00000078369	GNB1			0					0				0		0	6.24281	2.2	10	6.5	0	0	0	0.1	0	0	0	0.8	0	0	0	0	0	0	0.1	0	0	0	0	0.4	0.3	0	0.5	guanine nucleotide binding protein (G protein), beta polypeptide 1	2782	protein_coding
ENSG00000169885	CALML6			0					0				0		0	0	0	0	0	0	0	0	0	0	0	0	0	0	0	0	0	0	0	0	0	0	0.2	0	0	0	0	0	calmodulin-like 6	163688	protein_coding
ENSG00000178821	TMEM52			0					0				0		0	0	0	0	0	0	0	0	0	0	0	0	0	0	0	0	0	0	0	0	0	0	0	0	0	0	0	0	transmembrane protein 52	339456	protein_coding
ENSG00000142609	C1orf222			0					0				0		0	0	0	0	0	0	0	0	0	0	0	0	0	0	0	0	0	0	0	0	0	0	0.3	0	0.4	0	0	0.2	chromosome 1 open reading frame 222	85452	protein_coding
ENSG00000187730	GABRD			0					0				0		0	0.0905969	0	0	0.3	0	0	0	0	0	0	0	0	0	0	0	0	0	0	0	0	0	0	0	0	0	0	0	gamma-aminobutyric acid (GABA) A receptor, delta	2563	protein_coding
ENSG00000067606	PRKCZ			0					0			2.7	1		0	4.15287	2.4	2.1	7.9	0.2	0	0	0	0	0	0	0	0	0	0	0	0	0	0	0.1	0	0	0	0.9	2.7	0.3	1	protein kinase C, zeta	5590	protein_coding
ENSG00000162585	C1orf86			0					0			1.4	2		0	1.52772	0.4	1.2	3	0	0	0	0	0	0	0	0	0	0	0	0	0	0	0	0	0	0.2	0	0.7	0	1.5	1.2	chromosome 1 open reading frame 86	199990	protein_coding
ENSG00000269554	AL590822.2			0					0				0		0	0	0	0	0	0	0	0	0	0	0	0	0	0	0	0	0	0	0	0	0	0	0	0	0	0	0.3	0.2	Uncharacterized protein; cDNA FLJ36608 fis, clone TRACH2015824	NA	protein_coding
ENSG00000203301	AL590822.1			0					0				0		0	0	0	0	0	0	0	0	0	0	0	0	0	0	0	0	0	0	0	0	0	0	0	0	0	0	0	0	Uncharacterized protein	NA	protein_coding
ENSG00000157933	SKI			0					0				0		0	0	0	0	0	0	0	0	0	0	0	0	0	0	0	0	0	0	0	0	0	0	0.2	0	0	0	0	0	v-ski avian sarcoma viral oncogene homolog	6497	protein_coding
ENSG00000116151	MORN1			0					0				0		0	0.316618	0.2	0.5	0.3	0	0	0	0	0	0	0	0	0	0	0	0	0	0	0	0	0	0	0	0	0	0	0	MORN repeat containing 1	79906	protein_coding
ENSG00000269753	AL589739.1			0					0				0		0	0	0	0	0	0	0	0	0	0	0	0	0	0	0	0	0	0	0	0	0	0	0	0	0	0	0	0	Uncharacterized protein	NA	protein_coding
ENSG00000157916	RER1			0					0				0		0	32.5442	18.1	34.4	45.1	0.1	0.5	0	0.6	0	0	0.1	2.1	0.1	1.2	0.2	0.1	0.3	0	0.1	1.6	0.2	1.8	0.3	0.2	0.3	1.8	1.2	retention in endoplasmic reticulum sorting receptor 1	11079	protein_coding
ENSG00000157911	PEX10			0					0				0		0	0	0	0	0	0	0	0	0	0	0	0	0	0	0	0	0	0	0	0	0	0	0	0	0	0.3	0	0	peroxisomal biogenesis factor 10	5192	protein_coding
ENSG00000149527	PLCH2			0					0				0		0	0	0	0	0	0	0	0	0	0	0	0	0	0	0	0	0	0	0	0	0	0	0.3	0	0.2	0.3	0.3	0.2	phospholipase C, eta 2	9651	protein_coding
ENSG00000157881	PANK4			0					0				0		0	0	0	0	0	0	0	0	0	0	0	0	0	0	0	0	0	0	0	0	0	0	0	0.3	0	0	0	0	pantothenate kinase 4	55229	protein_coding
ENSG00000197921	HES5			0					0				0		0	0	0	0	0	0	0	0	0	0	0	0	0	0	0	0	0	0	0	0	0	0	0.3	0	0	0	0	0	hes family bHLH transcription factor 5	388585	protein_coding
ENSG00000157873	TNFRSF14			0					0				0		0	0	0	0	0	0	0	0	0	0	0	0	0	0	0	0	0	0	0	0	0	0	0	0	0	0	0	0	tumor necrosis factor receptor superfamily, member 14	8764	protein_coding
ENSG00000157870	FAM213B			0					0				0		0	0	0	0	0	0	0	0	0	0	0	0	0	0	0	0	0	0	0	0	0	0	0	0	0	0	0	0	family with sequence similarity 213, member B	127281	protein_coding
ENSG00000142606	MMEL1			0					0				0		0	0	0	0	0	0	0	0	0	0	0	0	0	0	0	0	0	0	0	0	0	0	0	0	0	0.3	0	0.2	membrane metallo-endopeptidase-like 1	79258	protein_coding
ENSG00000215912	TTC34			0					0				0		0	0	0	0	0	0	0	0	0	0	0	0	0	0	0	0	0	0	0	0	0	0	0	0	0	0	0	0.2	tetratricopeptide repeat domain 34	100287898	protein_coding
ENSG00000169717	ACTRT2			0					0			7.5	1		0	0.0791126	0	0.2	0	0	0	0	0	0	0	0	0	0	0	0	0	0	0	0	0	0	0.2	0	0	0	0	7.5	actin-related protein T2	140625	protein_coding
ENSG00000142611	PRDM16			0					0				0		0	0	0	0	0	0	0	0	0	0	0	0	0	0	0	0	0	0	0	0	0	0	0.2	0	0.2	0.3	0	0.7	PR domain containing 16	63976	protein_coding
ENSG00000130762	ARHGEF16			0					0				0		0	0	0	0	0	0	0	0	0	0	0	0	0	0	0	0	0	0	0	0	0	0	0	0	0	0	0	0.5	Rho guanine nucleotide exchange factor (GEF) 16	27237	protein_coding
ENSG00000162591	MEGF6			0					0			1.2	1		0	0	0	0	0	0	0	0	0	0	0	0	0	0	0	0	0	0	0	0	0	0	0.2	0	0	1.2	0	0.5	multiple EGF-like-domains 6	1953	protein_coding
ENSG00000158109	TPRG1L			0					0				0		0	0.237338	0	0.7	0	0	0	0	0	0	0	0	0	0	0	0	0	0	0	0	0	0	0.2	0	0.2	0	0	0	tumor protein p63 regulated 1-like	127262	protein_coding
ENSG00000116213	WRAP73			0					0				0		0	0	0	0	0	0	0	0	0	0	0	0	0	0	0	0	0	0	0	0	0	0	0.2	0	0	0	0	0	WD repeat containing, antisense to TP73	49856	protein_coding
ENSG00000078900	TP73			0					0				0		0	0	0	0	0	0	0	0	0	0	0	0	0	0	0	0	0	0	0	0	0	0	0	0	0	0	0	0	tumor protein p73	7161	protein_coding
ENSG00000162592	CCDC27			0					0			19.5	3		0	0.723832	0.4	0.9	0.8	0	0	0	0	0.1	0	0	0	0	0	0	0	0	0	0	0	0	2.1	0.3	0	0.6	1.5	54.8	coiled-coil domain containing 27	148870	protein_coding
ENSG00000235169	SMIM1			0					0				0		0	0	0	0	0	0	0	0	0	0	0	0	0	0	0	0	0	0	0	0	0	0	0	0	0	0	0	0	small integral membrane protein 1 (Vel blood group)	388588	protein_coding
ENSG00000130764	LRRC47			0					0			1.8	1		0	0	0	0	0	0	0	0	0	0	0	0	0	0	0	0	0	0	0	0	0	0	0.3	1.8	0.5	0	0.9	0.2	leucine rich repeat containing 47	57470	protein_coding
ENSG00000116198	CEP104			0					0			70.7	1		0	24.1037	21.6	19.2	31.5	0	0	0	0	0	0	0	0	0	1.2	0	0.1	0	0	0	0	0	70.7	0.3	0.4	0.3	0.3	0.2	centrosomal protein 104kDa	9731	protein_coding
ENSG00000169598	DFFB			0					0				0		0	0	0	0	0	0	0	0	0	0	0	0	0	0	0	0	0	0	0	0	0	0	0.2	0.3	0	0	0	0.2	DNA fragmentation factor, 40kDa, beta polypeptide (caspase-activated DNase)	1677	protein_coding
ENSG00000198912	C1orf174			0					0				0		0	9.45228	10.4	10.9	7.1	0	0	0	0	0	0	0	0	0	0	0.2	0	0	0	0	0	0	1.5	0	0.5	0	0.9	0	chromosome 1 open reading frame 174	339448	protein_coding
ENSG00000196581	AJAP1			0					0				0		0	0.679005	0.2	0.5	1.4	0	0	0	0.1	0	0	0	0	0	0	0	0	0	0	0	0	0	0.2	0.3	0	0	0	0	adherens junctions associated protein 1	55966	protein_coding
ENSG00000131697	NPHP4			0					0				0		0	0	0	0	0	0	0	0	0	0	0	0	0	0	0	0	0	0	0	0	0	0	0	0	0	0	0.3	0	nephronophthisis 4	261734	protein_coding
ENSG00000069424	KCNAB2			0					0				0		0	0	0	0	0	0	0	0	0	0	0	0	0	0	0	0	0	0	0	0	0	0	0	0	0	0	0	0.5	potassium voltage-gated channel, shaker-related subfamily, beta member 2	8514	protein_coding
ENSG00000268332	AL035406.1			0					0				0		0	0	0	0	0	0	0	0	0	0	0	0	0	0	0	0	0	0	0	0	0	0	0	0	0	0	0	0	Uncharacterized protein	NA	protein_coding
ENSG00000116254	CHD5			0					0			1.1	1		0	0.0791126	0	0.2	0	0	0	0	0	0	0	0	0	0	0	0	0	0	0	0	0	0	0.3	0.5	1.1	0.6	0.6	0.7	chromodomain helicase DNA binding protein 5	26038	protein_coding
ENSG00000116251	RPL22			0					0			16.9	2		0	50.0933	36.8	53.4	60.1	0.5	0.5	0.5	0.9	0.1	0.3	0.2	2.3	1.3	2	0.8	0.6	0.4	0.6	0	0.9	0.1	13.2	6.3	9.2	8.1	1.2	20.7	ribosomal protein L22	6146	protein_coding
ENSG00000158286	RNF207			0					0				0		0	0	0	0	0	0	0	0	0	0	0	0	0	0	0	0	0	0	0	0	0	0	0	0.3	0	0.3	0	0	ring finger protein 207	388591	protein_coding
ENSG00000173673	HES3			0					0				0		0	0	0	0	0	0	0	0	0	0	0	0	0	0	0	0	0	0	0	0	0	0	0	0	0	0	0	0	hes family bHLH transcription factor 3	390992	protein_coding
ENSG00000158292	GPR153			0					0				0		0	0	0	0	0	0	0	0	0	0	0	0	0	0	0	0	0	0	0	0	0	0	0.2	0	0	0.3	0	0	G protein-coupled receptor 153	387509	protein_coding
ENSG00000097021	ACOT7			0					0			4.8	1		0	3.10949	4.5	2.1	2.7	0	0	0	0	0	0	0	0	0	0.2	0	0	0	0	0	0	0	0	0	0.4	4.8	0	0.5	acyl-CoA thioesterase 7	11332	protein_coding
ENSG00000069812	HES2			0					0				0		0	0	0	0	0	0	0	0	0	0	0	0	0	0	0	0	0	0	0	0	0	0	0.2	0	0	0	0	0	hes family bHLH transcription factor 2	54626	protein_coding
ENSG00000187017	ESPN			0					0				0		0	0	0	0	0	0	0	0	0	0	0	0	0	0	0	0	0	0	0	0	0	0	0.3	0.3	0.2	0.3	0	0.2	espin	83715	protein_coding
ENSG00000215788	TNFRSF25			0					0				0		0	0	0	0	0	0	0	0	0	0	0	0	0	0	0	0	0	0	0	0	0	0	0	0	0.4	0.3	0	0	tumor necrosis factor receptor superfamily, member 25	8718	protein_coding
ENSG00000171680	PLEKHG5			0					0				0		0	0.0791126	0	0.2	0	0	0	0	0	0	0	0	0	0	0	0	0	0	0	0	0	0	0.3	0.5	0.4	0	0	0.5	pleckstrin homology domain containing, family G (with RhoGef domain) member 5	57449	protein_coding
ENSG00000162408	NOL9			0					0				0		0	24.064	18.3	31.3	22.6	0	0.4	0.2	0.2	0.1	0.8	1.1	0.5	0	0	0	0	0	0.1	0	0.4	0	0	0.8	0.4	0	0	0	nucleolar protein 9	79707	protein_coding
ENSG00000173662	TAS1R1			0					0				0		0	0	0	0	0	0	0	0	0	0	0	0	0	0	0	0	0	0	0	0	0	0	0.2	0.3	0.7	0	0	0	taste receptor, type 1, member 1	80835	protein_coding
ENSG00000204859	ZBTB48			0					0				0		0	0	0	0	0	0	0	0	0	0	0	0	0	0	0	0	0	0	0	0	0	0	0.2	0	0	0	0	0.2	zinc finger and BTB domain containing 48	3104	protein_coding
ENSG00000162413	KLHL21			0					0				0		0	1.13199	0.2	0.5	2.7	0	0	0	0.1	0	0	0	0	0.1	0	0	0	0	0	0	0	0	0	0.3	0	0	0	0	kelch-like family member 21	9903	protein_coding
ENSG00000116273	PHF13			0					0				0		0	0	0	0	0	0	0	0	0	0	0	0	0	0	0	0	0	0	0	0	0	0	0	0	0.4	0.3	0	0.2	PHD finger protein 13	148479	protein_coding
ENSG00000041988	THAP3			0					0				0		0	0	0	0	0	0	0	0	0	0	0	0	0	0	0	0	0	0	0	0	0	0	0	0	0	0	0	0	THAP domain containing, apoptosis associated protein 3	90326	protein_coding
ENSG00000007923	DNAJC11			0					0			5.3	2		0	8.91318	6.5	8.5	11.7	0	0.3	0	0.1	0	0.2	0	1.2	0	0	0.2	0	0	0	0	0	0	8.3	0.3	0.2	0	0.3	2.4	DnaJ (Hsp40) homolog, subfamily C, member 11	55735	protein_coding
ENSG00000171735	CAMTA1			0					0			761.7	2		0	68.4593	52.9	72.9	79.6	1.2	3.1	0.2	1.4	0.4	0.2	1.2	0.3	2.5	0	0.7	0	0.1	0.3	0.1	0.4	0.1	22.5	0.8	9.2	3.9	1500.9	6	calmodulin binding transcription activator 1	23261	protein_coding
ENSG00000049245	VAMP3			0					0				0		0	2.21649	1.6	2.8	2.2	0	0	0	0.1	0.1	0	0	0	0	0	0	0	0	0.2	0	0	0	0	0	0	0	0.3	0	vesicle-associated membrane protein 3	9341	protein_coding
ENSG00000049246	PER3			0					0				0		0	16.488	17.9	14.7	16.9	0	0.1	0	0	0	0	0	0	0.4	0	0	0	0	0.1	0	0	0	0	0	0.7	0.9	0	0.5	period circadian clock 3	8863	protein_coding
ENSG00000049247	UTS2			0					0				0		0	1.21049	1	0.7	1.9	0	0	0	0	0	0.1	0.2	0	0	0	0	0	0	0	0	0	0	0	0	0	0	0	0	urotensin 2	10911	protein_coding
ENSG00000049249	TNFRSF9			0					0				0		0	0	0	0	0	0	0	0	0	0	0	0	0	0	0	0	0	0	0	0	0	0	0	0	0.2	0	0	0	tumor necrosis factor receptor superfamily, member 9	3604	protein_coding
ENSG00000116288	PARK7			0					0			569.8	1		0	609.401	438.1	588.6	801.5	7.1	17.9	0.9	2.2	1.1	1.6	3.3	16	6.6	17.6	3.6	5.7	4.6	2.3	1.7	3.4	1	113.7	569.8	17.7	128.5	10.6	12.5	parkinson protein 7	11315	protein_coding
ENSG00000116285	ERRFI1			0					0			114.1	1		0	51.0154	50.2	48.2	54.6	0.1	1.2	0.2	0	0	0	0.1	0	0.1	1.2	0.6	0.1	0	0.1	0.1	0.1	0.1	114.1	0	3.9	2.4	0.9	0.2	ERBB receptor feedback inhibitor 1	54206	protein_coding
ENSG00000162426	SLC45A1			0					0				0		0	0.723832	0.4	0.9	0.8	0	0	0	0	0	0	0	0	0	0.2	0	0	0	0	0	0	0	0.2	0.3	0.2	0.3	0.6	0.2	solute carrier family 45, member 1	50651	protein_coding
ENSG00000142599	RERE			0					0			7.4	1		0	0.0791126	0	0.2	0	0	0	0	0	0	0	0	0	0	0	0	0	0	0	0	0	0	7.4	0.3	0.4	0	0.6	0.5	arginine-glutamic acid dipeptide (RE) repeats	473	protein_coding
ENSG00000074800	ENO1			0					0			723.3	6		0	4.82861	4.9	5	4.6	0	0	0	0	0	0	0	0	0.2	0	0	0	0	0	0	0	0	1076.4	208	1374.4	62.8	1461.5	157	enolase 1, (alpha)	2023	protein_coding
ENSG00000131686	CA6			0					0				0		0	1.60556	0.4	3.3	1.1	0	0	0	0	0	0	0	0	0	0	0	0	0	0	0	0	0	0	0	0	0	0	0.2	carbonic anhydrase VI	765	protein_coding
ENSG00000197241	SLC2A7			0					0				0		0	0	0	0	0	0	0	0	0	0	0	0	0	0	0	0	0	0	0	0	0	0	0	0.3	0	0.3	0.3	0.2	solute carrier family 2 (facilitated glucose transporter), member 7	155184	protein_coding
ENSG00000142583	SLC2A5			0					0			9.6	2		0	17.7822	16.7	11.4	25.3	0	0	0	0.5	0	0	0	0.3	0.1	0.5	0	0	0.1	0	0	0	0	0.3	0.5	0.4	6	13.3	0.5	solute carrier family 2 (facilitated glucose/fructose transporter), member 5	6518	protein_coding
ENSG00000180758	GPR157			0					0				0		0	0	0	0	0	0	0.1	0	0	0	0	0	0	0	0	0	0	0	0	0	0	0	0	0	0	0.3	0	0	G protein-coupled receptor 157	80045	protein_coding
ENSG00000049239	H6PD			0					0				0		0	0	0	0	0	0	0	0	0	0	0	0	0	0	0	0	0	0	0	0	0	0	0.2	0	0	0	0	0	hexose-6-phosphate dehydrogenase (glucose 1-dehydrogenase)	9563	protein_coding
ENSG00000171621	SPSB1			0					0				0		0	0	0	0	0	0	0	0	0	0	0	0	0	0	0	0	0	0	0	0	0	0	0	0	0	0	0	0	splA/ryanodine receptor domain and SOCS box containing 1	80176	protein_coding
ENSG00000171612	SLC25A33			0					0			15.1	1		0	27.4831	22.2	28.5	31.8	0.1	0.3	0	0.1	0	0	0.7	0.2	0.1	0.7	0	0.3	0	1.9	0.1	0.1	0	0.3	0.3	0.9	0.6	15.1	0.5	solute carrier family 25 (pyrimidine nucleotide carrier), member 33	84275	protein_coding
ENSG00000188807	TMEM201			0					0				0		0	0	0	0	0	0	0	0	0	0	0	0	0	0	0	0	0	0	0	0	0	0	0.3	0.3	0	0	0	0	transmembrane protein 201	199953	protein_coding
ENSG00000171608	PIK3CD			0					0				0		0	0.0905969	0	0	0.3	0	0	0	0	0	0	0	0	0	0	0	0	0	0	0	0	0	0.5	0.8	0	0.3	0	0.7	phosphatidylinositol-4,5-bisphosphate 3-kinase, catalytic subunit delta	5293	protein_coding
ENSG00000179840	C1orf200			0					0				0		0	0	0	0	0	0	0	0	0	0	0	0	0	0	0	0	0	0	0	0	0	0	0	0	0	0	0	0	chromosome 1 open reading frame 200	NA	protein_coding
ENSG00000171603	CLSTN1			0					0				0		0	0.5878	1	0.5	0.3	0	0	0	0	0	0	0	0	0	0	0	0	0	0	0	0	0	0.3	0	0	0.3	0.3	0.5	calsyntenin 1	22883	protein_coding
ENSG00000178585	CTNNBIP1			0					0				0		0	0	0	0	0	0	0	0	0	0	0	0	0	0	0	0	0	0	0	0	0	0	0	0	0	0	0	0	catenin, beta interacting protein 1	56998	protein_coding
ENSG00000162441	LZIC			0					0				0		0	1091.86	714.1	991.4	1570.1	2.7	30.3	3.8	3.5	1.8	0.4	2.3	22.9	3.8	17.6	14.1	3.5	2.7	5.7	1.8	1.6	0.5	4.3	2.8	3.2	32	28.5	23.1	leucine zipper and CTNNBIP1 domain containing	84328	protein_coding
ENSG00000173614	NMNAT1			0					0				0		0	4.78322	2.4	7.8	4.1	0.3	0	0	0	0	0.1	0.2	0	0.3	0	0	0	0	0	0	0.1	0	0	0	0	0	0	0.2	nicotinamide nucleotide adenylyltransferase 1	64802	protein_coding
ENSG00000162444	RBP7			0					0			43.9	3		0	4.74139	1.2	4	9	0	0	0	0	0	0	0	0	0	0	0	0	0	0	0	0	0	1.3	0.3	0	0	101.4	29.1	retinol binding protein 7, cellular	116362	protein_coding
ENSG00000130939	UBE4B			0					0				0		0	7.94985	8.1	7.8	7.9	0	0	0	0	0	0	0	0	0	0.3	0	0	0	0	0	0	0	0.3	0	0.4	0.3	0	0	ubiquitination factor E4B	10277	protein_coding
ENSG00000054523	KIF1B			0					0				0		0	64.5384	51.7	61.2	80.7	0.5	1	0	0	0.4	0.2	0.1	0.2	0.5	0	0.5	0	0	0.3	0	0.4	0	14.9	0.3	0.2	1.8	0.3	0.7	kinesin family member 1B	23095	protein_coding
ENSG00000142657	PGD			0					0			42.7	2		0	26.3666	19.1	24.9	35.1	0	0.1	0	0.2	0.1	0	0	3	0.3	0.9	0.1	0	0	0.2	0	0	0	72.4	0.8	1.9	3.9	4.2	13	phosphogluconate dehydrogenase	5226	protein_coding
ENSG00000175279	APITD1			0					0				0		0	0	0	0	0	0	0	0	0	0	0	0	0	0	0	0	0	0	0	0	0	0	0	0	0	0	0	0	apoptosis-inducing, TAF9-like domain 1	378708	protein_coding
ENSG00000251503	APITD1-CORT			0					0				0		0	0	0	0	0	0	0	0	0	0	0	0	0	0	0	0	0	0	0	0	0	0	0	0	0	0	0	0	APITD1-CORT readthrough	100526739	protein_coding
ENSG00000241563	CORT			0					0				0		0	0	0	0	0	0	0	0	0	0	0	0	0	0	0	0	0	0	0	0	0	0	0	0	0.2	0	0	0	cortistatin	1325	protein_coding
ENSG00000160049	DFFA			0					0				0		0	7.0122	5.3	7.6	8.2	0	0	0	0	0	0	0	0.2	0	0	0	0	0	0	0	0	0	0.2	0	0.2	0	0	0	DNA fragmentation factor, 45kDa, alpha polypeptide	1676	protein_coding
ENSG00000142655	PEX14			0					0				0		0	0	0	0	0	0	0	0	0	0	0	0	0	0	0	0	0	0	0	0	0	0	0	0	0	0	0.3	0.2	peroxisomal biogenesis factor 14	5195	protein_coding
ENSG00000130940	CASZ1			0					0			2.3	1		0	0	0	0	0	0	0	0	0.1	0	0	0	0	0	0	0	0	0	0	0	0	0	0.5	0.3	2.3	0.6	0.6	0.7	castor zinc finger 1	54897	protein_coding
ENSG00000175262	C1orf127			0					0				0		0	0	0	0	0	0	0	0	0	0	0	0	0	0	0	0	0	0	0	0	0	0	0.3	0.5	0	0	0	0	chromosome 1 open reading frame 127	148345	protein_coding
ENSG00000120948	TARDBP			0					0			165.9	1		0	69.6585	68.1	74.5	66.3	0.3	1.2	0.3	0.5	0.5	0	0	0.3	0.4	1.2	0.7	0.1	0	1	0	0.1	0	9.6	0	17	0.3	0	165.9	TAR DNA binding protein	23435	protein_coding
ENSG00000009724	MASP2			0					0				0		0	11.6369	7.3	15.9	11.7	0	0	0	0	0	0	0.2	0	0	0.3	0	0	0	0.2	0	0	0	0	0.3	0	0.9	0	0	mannan-binding lectin serine peptidase 2	10747	protein_coding
ENSG00000116649	SRM			0					0				0		0	0.440725	0.6	0.7	0	0	0	0	0	0	0	0	0	0	0	0	0	0	0	0	0	0	0	0	0.4	0	0	0	spermidine synthase	6723	protein_coding
ENSG00000171824	EXOSC10			0					0			488.3	3		0	185.358	134.6	191.8	229.7	0.2	5.4	0.2	0.6	0.4	0.7	0.7	4	0.7	4.1	0.8	0.7	1.6	1.2	0.6	0.4	0	1203.9	29.9	15.4	212.5	48.4	37.3	exosome component 10	5394	protein_coding
ENSG00000198793	MTOR			0					0				0		0	98.4847	69.4	99.4	126.7	0.6	1.8	0	0.5	0.1	0	1.6	0.3	0.7	0.5	0.5	0.7	0.1	0	0.2	0.1	0	2.5	0.5	2.7	5.1	8.2	1.2	mechanistic target of rapamycin (serine/threonine kinase)	2475	protein_coding
ENSG00000171819	ANGPTL7			0					0				0		0	5.87987	4.7	8.1	4.9	0.1	0	0	0	0	0	0	0.2	0.1	0	0	0	0	0	0	0	0	0.2	0	0	0	0	0	angiopoietin-like 7	10218	protein_coding
ENSG00000120942	UBIAD1			0					0				0		0	0.758285	0.4	0.2	1.6	0	0	0	0	0	0	0	0	0	0	0	0	0	0.1	0	0.1	0	0	0	0.5	0	0	0	UbiA prenyltransferase domain containing 1	29914	protein_coding
ENSG00000204624	PTCHD2			0					0				0		0	0	0	0	0	0	0	0	0	0	0	0	0	0	0	0	0	0	0	0	0	0	0	0	0	0	0.9	0.5	patched domain containing 2	57540	protein_coding
ENSG00000116661	FBXO2			0					0				0		0	0	0	0	0	0	0	0	0	0	0	0	0	0	0	0	0	0	0	0	0	0	0	0.3	0	0	0	0	F-box protein 2	26232	protein_coding
ENSG00000132879	FBXO44			0					0				0		0	0	0	0	0	0	0	0	0	0	0	0	0	0	0	0	0	0	0	0	0	0	0	0	0	0	0	0.2	F-box protein 44	93611	protein_coding
ENSG00000116663	FBXO6			0					0				0		0	0	0	0	0	0	0	0	0	0	0	0	0	0	0	0	0	0	0	0	0	0	0	0	0	0	0	0	F-box protein 6	26270	protein_coding
ENSG00000116670	MAD2L2			0					0				0		0	0	0	0	0	0	0	0	0	0	0	0	0	0	0	0	0	0	0	0	0	0	0	0	0	0	0	0.2	MAD2 mitotic arrest deficient-like 2 (yeast)	10459	protein_coding
ENSG00000162490	DRAXIN			0					0				0		0	0	0	0	0	0	0	0	0	0	0	0	0	0	0	0	0	0	0	0	0	0	0	0.3	0	0	0	0	dorsal inhibitory axon guidance protein	374946	protein_coding
ENSG00000177674	AGTRAP			0					0			1489.4	6		0	1.69649	0.8	2.4	1.9	0	0.1	0	0	0	0	0	0	0	0	0	0	0	0	0	0	0	179.7	1.3	3.7	2058	265.5	6428.1	angiotensin II receptor-associated protein	57085	protein_coding
ENSG00000215910	C1orf167			0					0				0		0	0.836622	1	0.9	0.5	0	0	0	0	0	0	0	0	0	0	0	0	0	0	0	0	0	0	0.3	0.2	0.6	0.3	0.2	chromosome 1 open reading frame 167	NA	protein_coding
ENSG00000177000	MTHFR			0					0			1	1		0	0	0	0	0	0	0	0	0	0	0	0	0	0	0	0	0	0	0	0	0	0	0.2	1	0.2	0	0.3	0.2	methylenetetrahydrofolate reductase (NAD(P)H)	4524	protein_coding
ENSG00000011021	CLCN6			0					0				0		0	0	0	0	0	0	0	0	0	0	0	0	0	0	0	0	0	0	0	0	0	0	0.3	0.5	0	0	0	0	chloride channel, voltage-sensitive 6	1185	protein_coding
ENSG00000175206	NPPA			0					0				0		0	0.16971	0	0.2	0.3	0	0	0	0	0	0	0	0	0	0	0	0	0	0	0	0	0	0	0.3	0	0	0	0.2	natriuretic peptide A	4878	protein_coding
ENSG00000120937	NPPB			0					0				0		0	0	0	0	0	0	0	0	0	0	0	0	0	0	0	0	0	0	0	0	0	0	0	0	0	0	0	0	natriuretic peptide B	4879	protein_coding
ENSG00000116685	KIAA2013			0					0				0		0	0.531322	0.6	0.7	0.3	0	0	0	0	0	0	0	0	0	0	0	0	0	0	0	0	0	0	0	0	0.6	0.3	0.2	KIAA2013	90231	protein_coding
ENSG00000083444	PLOD1			0					0			367.9	6		0	3.44962	2.2	4	4.1	0	0	0.2	0.1	0	0	0	0	0	0.2	0	0	0	0	0	0	0	77.5	10.1	1.1	2008.7	31.2	78.6	procollagen-lysine, 2-oxoglutarate 5-dioxygenase 1	5351	protein_coding
ENSG00000116688	MFN2			0					0				0		0	0	0	0	0	0	0	0	0	0	0	0	0	0	0	0	0	0	0	0	0	0	0	0.3	0	0	0	0	mitofusin 2	9927	protein_coding
ENSG00000116691	MIIP			0					0				0		0	0	0	0	0	0	0	0	0	0	0	0	0	0	0	0	0	0	0	0	0	0	0	0	0.4	0	0	0	migration and invasion inhibitory protein	60672	protein_coding
ENSG00000120949	TNFRSF8			0					0				0		0	0	0	0	0	0	0	0	0	0	0	0	0	0	0	0	0	0	0	0	0	0	0	0	0.2	0.9	0	0	tumor necrosis factor receptor superfamily, member 8	943	protein_coding
ENSG00000028137	TNFRSF1B			0					0				0		0	0	0	0	0	0	0	0	0	0	0	0	0	0	0	0	0	0	0	0	0	0	0.2	0	0	0.3	0	0	tumor necrosis factor receptor superfamily, member 1B	7133	protein_coding
ENSG00000048707	VPS13D			0					0				0		0	42.9173	29.5	38.9	60.3	0	0.5	0	0.5	0.6	0	0	0.8	0.1	0.5	0.5	0.5	0	1.2	0.1	0.1	0.1	1.2	1.5	1.2	8.7	3.6	0.7	vacuolar protein sorting 13 homolog D (S. cerevisiae)	55187	protein_coding
ENSG00000162496	DHRS3			0					0			39.4	1		0	12.1029	7.7	12.8	15.8	0	0	0	0	0.1	0	0.2	0.2	0.1	0	0.4	0.1	0	0	0	0	0	1	0.3	1.1	39.4	2.1	0	dehydrogenase/reductase (SDR family) member 3	9249	protein_coding
ENSG00000204518	AADACL4			0					0				0		0	0	0	0	0	0	0	0	0	0	0	0	0	0	0	0	0	0	0	0	0	0	0	0	0	0	0	0	arylacetamide deacetylase-like 4	343066	protein_coding
ENSG00000188984	AADACL3			0					0				0		0	0	0	0	0	0	0	0	0	0	0	0	0	0	0	0	0	0	0	0	0	0	0.2	0	0	0	0	0	arylacetamide deacetylase-like 3	126767	protein_coding
ENSG00000157330	C1orf158			0					0				0		0	145.987	101.1	154.5	182.4	0.9	1.4	0.5	3.5	0.4	0.3	0.4	2.6	1.1	3.2	0.7	0.1	0.9	1.2	0.2	0.2	0	2.1	2	0	6.3	5.4	2.2	chromosome 1 open reading frame 158	93190	protein_coding
ENSG00000116726	PRAMEF12			0					0				0		0	0	0	0	0	0	0	0	0	0	0	0	0	0	0	0	0	0	0	0	0	0	0	0	0.2	0.3	0	0	PRAME family member 12	390999	protein_coding
ENSG00000116721	PRAMEF1			0					0				0		0	1.8211	1.8	1.2	2.4	0	0	0	0	0	0	0	0	0	0	0	0	0	0	0	0	0	0	0	0	0	0	0	PRAME family member 1	65121	protein_coding
ENSG00000204513	PRAMEF11			0					0				0		0	0	0	0	0	0	0	0	0	0	0	0	0	0	0	0	0	0	0	0	0	0	0.5	0	0	0	0	0.2	PRAME family member 11	440560	protein_coding
ENSG00000179172	HNRNPCL1			0					0			4.8	3		0	6.75162	6.5	6.4	7.3	0	0	0	0.1	0	0	0.1	0	0	0.2	0.3	0	0	0.2	0	0	0	4.3	2.3	7.8	0.9	1.5	0	heterogeneous nuclear ribonucleoprotein C-like 1	343069	protein_coding
ENSG00000120952	PRAMEF2			0					0				0		0	3.0195	3.7	2.1	3.3	0	0	0	0	0	0	0	0	0	0	0	0	0	0	0	0.3	0	0	0	0	0	0	0.2	PRAME family member 2	65122	protein_coding
ENSG00000243073	PRAMEF4			0					0				0		0	0	0	0	0	0	0	0	0	0	0	0	0	0	0	0	0	0	0	0	0	0	0	0	0	0	0	0	PRAME family member 4	400735	protein_coding
ENSG00000187545	PRAMEF10			0					0				0		0	0	0	0	0	0	0	0	0	0	0	0	0	0	0	0	0	0	0	0	0	0	0.2	0.3	0	0	0.3	0	PRAME family member 10	343071	protein_coding
ENSG00000204510	PRAMEF7			0					0				0		0	0	0	0	0	0	0	0	0	0	0	0	0	0	0	0	0	0	0	0	0	0	0	0	0	0.3	0	0	PRAME family member 7	441871	protein_coding
ENSG00000232423	PRAMEF6			0					0				0		0	0	0	0	0	0	0	0	0	0	0	0	0	0	0	0	0	0	0	0	0	0	0.3	0	0	0	0	0	PRAME family member 6	343068	protein_coding
ENSG00000204508	PRAMEF22			0					0				0		0	0	0	0	0	0	0	0	0	0	0	0	0	0	0	0	0	0	0	0	0	0	0	0	0.2	0	0	0	PRAME family member 22	653606	protein_coding
ENSG00000239810	WI2-3308P17.2			0					0			10.9	6		0	0	0	0	0	0	0	0	0	0	0	0	0	0	0	0	0	0	0	0	0	0	18.3	3.3	9.4	7.5	9.1	17.8	Uncharacterized protein	NA	protein_coding
ENSG00000229571	PRAMEF26			0					0				0		0	0	0	0	0	0	0	0	0	0	0	0	0	0	0	0	0	0	0	0	0	0	0	0	0.4	0	0	0	PRAME family member 26	645359	protein_coding
ENSG00000204503	PRAMEF3			0					0				0		0	0	0	0	0	0	0	0	0	0	0	0	0	0	0	0	0	0	0	0	0	0	0.2	0	0.2	0	0.3	0	PRAME family member 3	401940	protein_coding
ENSG00000204502	PRAMEF5			0					0				0		0	0	0	0	0	0	0	0	0	0	0	0	0	0	0	0	0	0	0	0	0	0	0	0.5	0.4	0.3	0.3	0.5	PRAME family member 5	343068	protein_coding
ENSG00000182330	PRAMEF8			0					0				0		0	0	0	0	0	0	0	0	0	0	0	0	0	0	0	0	0	0	0	0	0	0	0.5	0	0.2	0.3	0	0.2	PRAME family member 8	391002	protein_coding
ENSG00000204501	PRAMEF9			0					0				0		0	0	0	0	0	0	0	0	0	0	0	0	0	0	0	0	0	0	0	0	0	0	0	0	0.2	0.3	0	0.2	PRAME family member 9	343070	protein_coding
ENSG00000204495	PRAMEF13			0					0				0		0	0.621751	0.4	1.2	0.3	0	0	0	0	0	0	0	0	0	0.2	0	0	0	0	0	0	0	0.3	0.3	0	0	0	0.2	PRAME family member 13	400736	protein_coding
ENSG00000204491	PRAMEF18			0					0				0		0	0	0	0	0	0.1	0	0	0	0	0	0	0	0	0	0	0	0	0	0	0	0	0	0	0	0	0	0	PRAME family member 18	391003	protein_coding
ENSG00000204488	PRAMEF16			0					0				0		0	0	0	0	0	0	0	0	0	0	0	0	0	0	0	0	0	0	0	0	0	0	0	0	0	0	0	0	PRAME family member 16	654348	protein_coding
ENSG00000204486	PRAMEF21			0					0				0		0	0	0	0	0	0	0	0	0	0	0	0	0	0	0	0	0	0	0	0	0	0	0	0	0	0	0	0	PRAME family member 21	391001	protein_coding
ENSG00000157358	PRAMEF15			0					0				0		0	0	0	0	0	0	0	0	0	0	0	0	0	0	0	0	0	0	0	0	0	0	0	0	0	0	0	0	PRAME family member 15	343070	protein_coding
ENSG00000204481	PRAMEF14			0					0				0		0	0.532097	0	0.2	1.4	0	0	0	0	0	0	0	0	0	0	0	0	0	0	0	0	0	0.2	0	0.2	0	0.3	0	PRAME family member 14	NA	protein_coding
ENSG00000204480	PRAMEF19			0					0				0		0	0	0	0	0	0	0	0	0	0	0	0	0	0	0	0	0	0	0	0	0	0	0	0	0	0	0	0	PRAME family member 19	391003	protein_coding
ENSG00000204479	PRAMEF17			0					0				0		0	0	0	0	0	0	0	0	0	0	0	0	0	0	0	0	0	0	0	0	0	0	0	0	0.4	0	0	0.2	PRAME family member 17	391004	protein_coding
ENSG00000204478	PRAMEF20			0					0				0		0	0	0	0	0	0	0	0	0	0	0	0	0	0	0	0	0	0	0	0	0	0	0	0	0	0	0	0	PRAME family member 20	391001	protein_coding
ENSG00000162494	LRRC38			0					0			9.9	1		0	0.293984	0.6	0	0.3	0	0	0	0	0	0	0	0	0	0	0.1	0	0	0	0	0	0	0.2	0.5	0	0	0	9.9	leucine rich repeat containing 38	126755	protein_coding
ENSG00000162493	PDPN			0					0				0		0	2.05921	1.2	1.4	3.5	0	0	0	0	0	0	0	0	0	0	0.1	0	0	0	0	0	0	0	0.3	0	0	0	0.2	podoplanin	10630	protein_coding
ENSG00000116731	PRDM2			0					0				0		0	115.329	86.6	123.2	136.2	0	0	1.8	0.7	0.1	0.1	0.7	0.8	0	1.2	3.4	0.2	0.4	0.2	0.2	0.2	0.4	4.6	3.3	4.1	6.9	20.9	18.7	PR domain containing 2, with ZNF domain	7799	protein_coding
ENSG00000189337	KAZN			0					0				0		0	0	0	0	0	0	0	0	0	0	0	0	0	0	0	0	0	0	0	0	0	0	0	0	0	0	0	0.2	kazrin, periplakin interacting protein	23254	protein_coding
ENSG00000171729	TMEM51			0					0				0		0	0.532097	0	0.2	1.4	0	0.1	0	0	0	0	0	0	0	0	0	0	0	0	0	0	0	0	0	0	0.3	0	0.2	transmembrane protein 51	55092	protein_coding
ENSG00000204464	C1orf195			0					0				0		0	1.65216	1.2	0.5	3.3	0	0	0	0	0	0	0	0	0	0	0	0	0	0	0	0	0	0	0	0	0	0	0	chromosome 1 open reading frame 195	727684	protein_coding
ENSG00000142634	EFHD2			0					0				0		0	0	0	0	0	0	0	0	0	0	0	0	0	0	0	0	0	0	0	0	0	0	0.2	0	0	0	0	0	EF-hand domain family, member D2	79180	protein_coding
ENSG00000162438	CTRC			0					0				0		0	0	0	0	0	0	0	0	0	0	0	0	0	0	0	0	0	0	0	0	0	0	0.2	0	0	0	0	0	chymotrypsin C (caldecrin)	11330	protein_coding
ENSG00000142615	CELA2A			0					0				0		0	0	0	0	0	0	0	0	0	0	0	0	0	0	0	0	0	0	0	0	0	0	0	0	0	0	0	0	chymotrypsin-like elastase family, member 2A	63036	protein_coding
ENSG00000215704	CELA2B			0					0				0		0	0.158393	0.2	0	0.3	0	0	0	0	0	0	0	0	0	0	0	0	0	0	0	0	0	0	0	0	0	0	0	chymotrypsin-like elastase family, member 2B	51032	protein_coding
ENSG00000132906	CASP9			0					0				0		0	18.5141	13	21.6	20.9	0	0	0	0	0	0	0.2	0	0.2	0.2	0	0	0	0.2	0	0	0.1	1.5	0	0.2	1.5	0	0.5	caspase 9, apoptosis-related cysteine peptidase	842	protein_coding
ENSG00000116138	DNAJC16			0					0				0		0	47.251	37.6	52.2	51.9	2	0.6	0	0.1	0.3	0.5	0	0	0.4	0	0.8	0	0.3	0.2	0	0.1	0	0.5	0.3	0	3	1.2	0	DnaJ (Hsp40) homolog, subfamily C, member 16	23341	protein_coding
ENSG00000116771	AGMAT			0					0			83.3	4		0	5.54295	3.1	5.7	7.9	0	0	0	0	0	0	0	0.3	0	0.5	0	0	0	0	0	0	0	9.6	213	47.5	0.6	0.9	63.2	agmatine ureohydrolase (agmatinase)	79814	protein_coding
ENSG00000197312	DDI2			0					0				0		0	3.04163	2.6	4	2.4	0	0	0	0	0	0	0	0	0.4	0	0	0	0	0	0	0	0	0	0	0	0	0	0	DNA-damage inducible 1 homolog 2 (S. cerevisiae)	6248	protein_coding
ENSG00000215695	RSC1A1			0					0				0		0	127.079	125.1	139.6	116.6	0	0	0.5	0.2	0	1.2	0.1	0.8	0	1.7	2	0.5	0	0.3	0.2	0	0	1.5	0	0	1.2	0	1	regulatory solute carrier protein, family 1, member 1	6248	protein_coding
ENSG00000116786	PLEKHM2			0					0			4.5	6		0	0.0677956	0.2	0	0	0	0	0	0	0	0	0	0	0	0	0	0	0	0	0	0	0	3.8	6.3	2.3	5.7	4.5	4.3	pleckstrin homology domain containing, family M (with RUN domain) member 2	23207	protein_coding
ENSG00000162461	SLC25A34			0					0				0		0	0	0	0	0	0	0	0	0	0	0	0	0	0	0	0	0	0	0	0	0	0	0	0	0	0	0	0	solute carrier family 25, member 34	284723	protein_coding
ENSG00000162460	TMEM82			0					0				0		0	0	0	0	0	0	0	0	0	0	0	0	0	0	0	0	0	0	0	0	0	0	0.2	0	0	0.3	0	0	transmembrane protein 82	388595	protein_coding
ENSG00000162458	FBLIM1			0					0				0		0	0	0	0	0	0	0	0	0	0	0	0	0	0	0	0	0	0	0	0	0	0	0	0	0	0	0	0	filamin binding LIM protein 1	54751	protein_coding
ENSG00000065526	SPEN			0					0				0		0	69.3825	78.5	69.3	60.3	0	14.8	0	0.2	0	0	2.6	0	0.8	0.9	0.6	0.2	0	0.2	0	0	0	3	1	1.6	1.2	5.4	4.6	spen family transcriptional repressor	23013	protein_coding
ENSG00000116809	ZBTB17			0					0				0		0	0	0	0	0	0	0	0	0	0	0	0	0	0	0	0	0	0	0	0	0	0	0.2	0.3	0.2	0.6	0	0.2	zinc finger and BTB domain containing 17	7709	protein_coding
ENSG00000183888	C1orf64			0					0				0		0	0	0	0	0	0	0	0	0	0	0	0	0	0	0	0	0	0	0	0	0	0	0	0	0	0	0	0.2	chromosome 1 open reading frame 64	149563	protein_coding
ENSG00000173641	HSPB7			0					0			12.7	1		0	0.146908	0.2	0.2	0	0	0	0	0	0	0	0	0	0	0	0	0	0	0	0	0.1	0	0.3	12.7	0	0.3	0	0.2	heat shock 27kDa protein family, member 7 (cardiovascular)	27129	protein_coding
ENSG00000186510	CLCNKA			0					0			9.1	2		0	1.91153	1.6	1.7	2.4	0	0	0	0	0	0	0	0	0	0	0	0.1	0	0	0	0.1	0	3.3	0	0	0.3	0.3	14.9	chloride channel, voltage-sensitive Ka	1187	protein_coding
ENSG00000184908	CLCNKB			0					0			15.2	2		0	2.40978	0.8	2.6	3.8	0	0	0	0	0	0	0	0.3	0	0.2	0	0	0.1	0.3	0	0.2	0	2.3	0	0.4	0.9	0.6	28.1	chloride channel, voltage-sensitive Kb	1188	protein_coding
ENSG00000185519	FAM131C			0					0				0		0	0	0	0	0	0	0	0	0	0	0	0	0	0	0	0	0	0	0	0	0	0	0	0	0	0.3	0	0	family with sequence similarity 131, member C	348487	protein_coding
ENSG00000142627	EPHA2			0					0			1.1	2		0	0	0	0	0	0	0	0	0	0	0	0	0	0	0	0	0	0	0	0	0	0	0	1	1.2	0	0	0	EPH receptor A2	1969	protein_coding
ENSG00000142632	ARHGEF19			0					0				0		0	0	0	0	0	0	0	0	0	0	0	0	0	0	0	0	0	0	0	0	0	0	0.2	0	0	0	0	0	Rho guanine nucleotide exchange factor (GEF) 19	128272	protein_coding
ENSG00000204377	C1orf134			0					0				0		0	0	0	0	0	0	0	0	0	0	0	0	0	0	0	0	0	0	0	0	0	0	0	0	0	0	0	0	chromosome 1 open reading frame 134	NA	protein_coding
ENSG00000132881	RSG1			0					0				0		0	0	0	0	0	0	0	0	0	0	0	0	0	0	0	0	0	0	0	0	0	0	0.2	0	0	0	0	0	REM2 and RAB-like small GTPase 1	79363	protein_coding
ENSG00000037637	FBXO42			0					0				0		0	3.90045	4.3	5	2.4	0	0	0	0	0	0	0	0	0	0.2	0	0	0	0	0	0	0	0.2	0	0.2	0.3	0	0.2	F-box protein 42	54455	protein_coding
ENSG00000055070	SZRD1			0					0				0		0	0	0	0	0	0	0	0	0	0	0	0	0	0	0	0	0	0	0	0	0.1	0	0.2	0	0	0	0	0	SUZ RNA binding domain containing 1	26099	protein_coding
ENSG00000187144	SPATA21			0					0				0		0	2.07086	1.4	0.7	4.1	0	0	0	0	0	0	0	0	0	0	0	0	0	0	0	0	0	0	0	0.2	0	0.3	0	spermatogenesis associated 21	374955	protein_coding
ENSG00000157191	NECAP2			0					0			2.1	1		0	1.18769	1.2	0.7	1.6	0	0	0	0	0	0	0	0	0	0	0	0	0	0	0	0	0	0.3	0	0	0	2.1	0.2	NECAP endocytosis associated 2	55707	protein_coding
ENSG00000268674	FAM231B			0					0				0		0	0	0	0	0	0	0	0	0	0	0	0	0	0	0	0	0	0	0	0	0	0	0	0	0	0	0	0	family with sequence similarity 231, member B	100133301	protein_coding
ENSG00000219481	NBPF1			0					0			7	1		0	11.1539	6.5	10.9	16	0	0.1	0	0	0	0	0	0	0	0.2	1.2	0	0	0	0	0.4	0	0	0.3	0.2	1.2	7	0	neuroblastoma breakpoint family, member 1	55672	protein_coding
ENSG00000237847	FAM231A			0					0				0		0	0.0905969	0	0	0.3	0	0	0	0	0	0	0	0	0	0	0	0	0	0	0	0	0	0	0	0	0.3	0	0	family with sequence similarity 231, member A	729574	protein_coding
ENSG00000268991	FAM231C			0					0				0		0	0.0677956	0.2	0	0	0	0	0	0	0	0	0	0	0	0	0	0	0	0	0	0	0	0	0	0	0.3	0	0	family with sequence similarity 231, member C	729574	protein_coding
ENSG00000058453	CROCC			0					0				0		0	0.16971	0	0.2	0.3	0	0	0	0	0	0	0	0	0	0	0	0	0	0	0	0	0	0.8	0.8	0.2	0.6	0.3	0.7	ciliary rootlet coiled-coil, rootletin	9696	protein_coding
ENSG00000117122	MFAP2			0					0				0		0	0.384413	0.4	0.5	0.3	0	0	0	0	0	0	0	0	0	0	0	0	0	0	0	0	0	0	0	0	0	0	0	microfibrillar-associated protein 2	4237	protein_coding
ENSG00000159363	ATP13A2			0					0				0		0	0	0	0	0	0	0	0	0	0	0	0	0	0	0	0	0	0	0	0	0	0	0	0	0.5	0.3	0.3	0.5	ATPase type 13A2	23400	protein_coding
ENSG00000117118	SDHB			0					0			2048.6	6		0	495.957	350	442.9	695	3.2	16.5	1.7	4.2	2.9	1.1	4.2	5.3	3.6	12.6	10.5	5.1	2.5	1	0.1	5	0.9	991.6	1829.5	1180.6	1514.2	1596.9	5179.1	succinate dehydrogenase complex, subunit B, iron sulfur (Ip)	6390	protein_coding
ENSG00000117115	PADI2			0					0			1.2	1		0	0.859424	0.8	0.9	0.8	0	0	0	0	0	0	0	0	0	0	0	0	0	0	0	0	0	0.3	0	0	0	1.2	0	peptidyl arginine deiminase, type II	11240	protein_coding
ENSG00000142623	PADI1			0					0				0		0	0	0	0	0	0	0	0	0	0	0	0	0	0	0	0	0	0	0	0	0	0	0.3	0	0	0.3	0	0	peptidyl arginine deiminase, type I	29943	protein_coding
ENSG00000142619	PADI3			0					0				0		0	0	0	0	0	0	0	0	0	0	0	0	0	0	0	0	0	0	0	0	0	0	0	0.3	0	0	0.3	0.7	peptidyl arginine deiminase, type III	51702	protein_coding
ENSG00000159339	PADI4			0					0				0		0	0	0	0	0	0	0	0	0	0	0	0	0	0	0	0	0	0	0	0	0	0	0	0	0	0.3	0.3	0	peptidyl arginine deiminase, type IV	23569	protein_coding
ENSG00000269468	AC004824.2			0					0				0		0	0	0	0	0	0	0	0	0	0	0	0	0	0	0	0	0	0	0	0	0	0	0	0	0	0	0	0	Uncharacterized protein	NA	protein_coding
ENSG00000179051	RCC2			0					0				0		0	0	0	0	0	0	0	0	0	0	0	0	0	0	0	0	0	0	0	0	0	0	0	0	0.2	0	0	0.2	regulator of chromosome condensation 2	55920	protein_coding
ENSG00000074964	ARHGEF10L			0					0			2.7	1		0	0.610602	0.8	0.5	0.5	0	0	0	0	0	0	0	0	0	0	0	0	0	0	0	0	0	0.2	0.5	0.2	2.7	0	0.2	Rho guanine nucleotide exchange factor (GEF) 10-like	55160	protein_coding
ENSG00000117148	ACTL8			0					0				0		0	0	0	0	0	0	0	0	0	0	0	0	0	0	0	0	0	0	0	0	0	0	0	0	0.2	0.3	0.9	0	actin-like 8	81569	protein_coding
ENSG00000117154	IGSF21			0					0				0		0	0	0	0	0	0	0	0	0	0	0	0	0	0	0	0	0	0	0	0	0	0	0.2	0	0	0	0	0	immunoglobin superfamily, member 21	84966	protein_coding
ENSG00000179023	KLHDC7A			0					0				0		0	0	0	0	0	0	0	0	0	0	0	0	0	0	0	0	0	0	0	0	0	0	0.3	0	0.2	0	0	0	kelch domain containing 7A	127707	protein_coding
ENSG00000009709	PAX7			0					0				0		0	0	0	0	0	0	0	0	0	0	0	0	0	0	0	0	0	0	0	0	0	0	0.2	0	0.4	0.3	0	0.2	paired box 7	5081	protein_coding
ENSG00000179002	TAS1R2			0					0				0		0	0	0	0	0	0	0	0	0	0	0	0	0	0	0	0	0	0	0	0	0	0	0.3	0	0	0.3	0	0	taste receptor, type 1, member 2	80834	protein_coding
ENSG00000255275	RP13-279N23.2			0					0				0		0	0	0	0	0	0	0	0	0	0	0	0	0	0	0	0	0	0	0	0	0	0	0	0	0	0	0	0		NA	protein_coding
ENSG00000159423	ALDH4A1			0					0				0		0	0	0	0	0	0	0	0	0	0	0	0	0	0	0	0	0	0	0	0	0	0	0	0	0	0.3	0.3	0	aldehyde dehydrogenase 4 family, member A1	8659	protein_coding
ENSG00000169991	IFFO2			0					0				0		0	0	0	0	0	0	0	0	0	0	0	0	0	0	0	0	0	0	0	0	0	0	0	0	0.2	0	0	0	intermediate filament family orphan 2	126917	protein_coding
ENSG00000127481	UBR4			0					0			78.5	2		0	34.324	24	42	37	0	0.9	0	0	0	0.3	0.2	3.6	0	0.7	0.5	0	0.1	0.2	0	0	0	9.8	4.8	147.1	6.6	0.9	6.2	ubiquitin protein ligase E3 component n-recognin 4	23352	protein_coding
ENSG00000127463	EMC1			0					0				0		0	24.747	18.7	25.6	29.9	0	0.9	0	0	0.1	0	0	1.5	0.1	0.2	0.6	0	0	0	0	0	0	0.5	0	0.4	0.6	0.9	1	ER membrane protein complex subunit 1	23065	protein_coding
ENSG00000053372	MRTO4			0					0				0		0	0	0	0	0	0	0	0	0	0	0	0	0	0	0	0	0	0	0	0	0	0	0	0	0	0	0	0	mRNA turnover 4 homolog (S. cerevisiae)	51154	protein_coding
ENSG00000211454	AKR7L			0					0				0		0	0.248822	0	0.5	0.3	0	0	0	0	0	0	0	0	0	0	0	0	0	0	0	0	0	0	0	0	0	0	0	aldo-keto reductase family 7-like	NA	polymorphic_pseudogene
ENSG00000162482	AKR7A3			0					0				0		0	0.339586	0.2	0	0.8	0	0	0	0	0	0	0	0	0	0	0	0	0	0	0	0	0	0	0	0	0.3	0	0	aldo-keto reductase family 7, member A3 (aflatoxin aldehyde reductase)	22977	protein_coding
ENSG00000053371	AKR7A2			0					0				0		0	0.64472	0.4	0.7	0.8	0.2	0	0	0	0	0	0	0	0	0	0	0	0	0	0	0	0	0.2	0.3	0.2	0.9	0	0	aldo-keto reductase family 7, member A2 (aflatoxin aldehyde reductase)	8574	protein_coding
ENSG00000040487	PQLC2			0					0				0		0	0	0	0	0	0	0	0	0	0	0	0	0	0	0	0	0	0	0	0	0	0	0.3	0	0	0	0	0	PQ loop repeat containing 2	54896	protein_coding
ENSG00000077549	CAPZB			0					0			78.1	1		0	230.942	179	240.4	273.4	0.3	5.3	0.8	0.7	1.1	0.3	0.7	10.7	1.5	2.7	2.7	0.6	0.7	1.7	0.4	0.4	0	8.6	0.5	8.5	13.4	78.1	24.5	capping protein (actin filament) muscle Z-line, beta	832	protein_coding
ENSG00000270136	MINOS1-NBL1			0					0			15.4	1		0	0.938369	0.6	1.7	0.5	0	0	0	0.1	0	0	0	0	0	0	0	0	0	0	0	0	0	0.3	0	0.2	0	15.4	0	MINOS1-NBL1 readthrough	4681	protein_coding
ENSG00000173436	MINOS1			0					0				0		0	0.248989	0.2	0	0.5	0	0	0	0	0	0	0	0	0	0	0	0	0	0	0	0	0	0	0	0.2	0	0	1	mitochondrial inner membrane organizing system 1	440574	protein_coding
ENSG00000158747	NBL1			0					0				0		0	0	0	0	0	0	0	0	0	0	0	0	0	0	0	0	0	0	0	0	0	0	0	0	0	0	0	0	neuroblastoma 1, DAN family BMP antagonist	4681	protein_coding
ENSG00000158748	HTR6			0					0				0		0	0	0	0	0	0	0	0	0	0	0	0	0	0	0	0	0	0	0	0	0	0	0.3	0.3	0	0.9	0	0.5	5-hydroxytryptamine (serotonin) receptor 6, G protein-coupled	3362	protein_coding
ENSG00000162542	TMCO4			0					0			1.9	1		0	0.0905969	0	0	0.3	0	0	0	0	0	0	0	0	0	0	0	0	0	0	0	0	0	0	0.5	0.2	0.3	0	1.9	transmembrane and coiled-coil domains 4	255104	protein_coding
ENSG00000178828	RNF186			0					0				0		0	0.158225	0	0.5	0	0	0	0	0	0	0	0	0	0	0	0	0	0	0	0	0	0	0	0	0	0	0	0	ring finger protein 186	54546	protein_coding
ENSG00000169914	OTUD3			0					0				0		0	0	0	0	0	0	0	0	0	0	0	0	0	0	0	0	0	0	0	0	0	0	0.5	0	0	0	0.3	0	OTU domain containing 3	23252	protein_coding
ENSG00000188784	PLA2G2E			0					0				0		0	0	0	0	0	0	0	0	0	0	0	0	0	0	0	0	0	0	0	0	0	0	0	0	0	0.3	0	0	phospholipase A2, group IIE	30814	protein_coding
ENSG00000188257	PLA2G2A			0					0			4.2	1		0	9.47856	5.1	11.4	12	0	0	0	0.1	0	0	0.3	0	0	0.3	0	0	0	0	0	0	0	1.2	0	0	4.2	0	0.5	phospholipase A2, group IIA (platelets, synovial fluid)	5320	protein_coding
ENSG00000127472	PLA2G5			0					0				0		0	1.85521	1.4	1.4	2.7	0	0	0	0	0	0	0	0	0	0	0	0	0	0	0	0	0	0	0	0	0	0	0	phospholipase A2, group V	5322	protein_coding
ENSG00000117215	PLA2G2D			0					0				0		0	0	0	0	0	0	0	0	0	0	0	0	0	0	0	0	0	0	0	0	0	0	0.3	0	0	0	0	0	phospholipase A2, group IID	26279	protein_coding
ENSG00000158786	PLA2G2F			0					0				0		0	0	0	0	0	0	0	0	0	0	0	0	0	0	0	0	0	0	0	0	0	0	0	0	0	0	0.3	0	phospholipase A2, group IIF	64600	protein_coding
ENSG00000187980	PLA2G2C			0					0				0		0	0	0	0	0	0	0	0	0	0	0	0	0	0	0	0	0	0	0	0	0	0	0.2	0	0	0	0.3	0	phospholipase A2, group IIC	391013	protein_coding
ENSG00000162543	UBXN10			0					0			8.3	2		0	5.91544	4.5	5.9	7.3	0	0	0	0	0	0	0	0	0	0	0	0	0	0	0	0	0	0.2	0.3	0.5	13.1	0	3.4	UBX domain protein 10	127733	protein_coding
ENSG00000158816	VWA5B1			0					0			2.3	5		0	0	0	0	0	0	0	0	0	0	0	0	0	0	0	0	0	0	0	0	0	0	1.5	4.1	1.8	2.7	0.9	1.4	von Willebrand factor A domain containing 5B1	127731	protein_coding
ENSG00000090432	MUL1			0					0			4.5	6		0	0.0677956	0.2	0	0	0	0	0	0	0	0.1	0	0	0	0	0	0	0	0	0	0	0	3.5	3.3	2.8	5.4	6.4	5.5	mitochondrial E3 ubiquitin protein ligase 1	79594	protein_coding
ENSG00000183114	FAM43B			0					0				0		0	0	0	0	0	0	0	0	0	0	0	0	0	0	0	0	0	0	0	0	0	0	0	0	0	0	0.3	0	family with sequence similarity 43, member B	163933	protein_coding
ENSG00000158825	CDA			0					0				0		0	2.29483	2.2	3.6	1.1	0	0	0.2	0	0	0	0	0.2	0	0	0	0.2	0	0.2	0	0	0	0	0	0	0	0	0	cytidine deaminase	978	protein_coding
ENSG00000158828	PINK1			0					0			28.4	2		0	47.0392	37.6	47.2	56.3	0.3	0.1	0.6	0	0.2	0.1	0	0.5	0.7	1	2.3	0.1	0	0.3	0	0.3	0	7.9	21.3	2.7	9.9	4.8	35.6	PTEN induced putative kinase 1	65018	protein_coding
ENSG00000244038	DDOST			0					0			3.3	1		0	9.80545	6.9	11.6	10.9	0	0	0	0.1	0	0.3	0	0.2	0.1	0	0	0	0	0	0	0	0	0	3.3	0.4	0.6	0	0.7	dolichyl-diphosphooligosaccharide--protein glycosyltransferase subunit (non-catalytic)	1650	protein_coding
ENSG00000117245	KIF17			0					0				0		0	0	0	0	0	0	0	0	0	0	0	0	0	0	0	0	0	0	0	0	0	0	0.2	0	0.2	0	0	0.2	kinesin family member 17	57576	protein_coding
ENSG00000189410	SH2D5			0					0				0		0	0	0	0	0	0	0	0	0	0	0	0	0	0	0	0	0	0	0	0	0	0	0	0	0.4	0.9	0.3	0.5	SH2 domain containing 5	400745	protein_coding
ENSG00000127483	HP1BP3			0					0				0		0	68.0012	60.6	71.9	71.5	0.2	0.5	0	0.6	0	0	1.3	0	0.4	0.7	0.2	0.3	0.1	0	0	0	0	3.6	2.8	1.4	7.5	1.8	4.1	heterochromatin protein 1, binding protein 3	50809	protein_coding
ENSG00000075151	EIF4G3			0					0			110.1	3		0	311.659	286	329.7	319.4	1.9	3.2	0	5.9	0.6	1.4	9.3	5.6	3.9	1.5	2.3	1	0.3	2.6	0.7	0.8	0.1	47.4	1	98.1	137.2	64.2	95.2	eukaryotic translation initiation factor 4 gamma, 3	8672	protein_coding
ENSG00000117298	ECE1			0					0				0		0	0	0	0	0	0	0	0	0	0	0	0	0	0	0	0	0	0	0	0	0	0	0.2	0.3	0	0	0.3	0.2	endothelin converting enzyme 1	1889	protein_coding
ENSG00000142794	NBPF3			0					0				0		0	1.11973	0.8	1.2	1.4	0	0	0	0	0	0	0	0.3	0	0	0.2	0	0	0	0	0	0	0.3	0	0.2	0.3	0.3	0.5	neuroblastoma breakpoint family, member 3	84224	protein_coding
ENSG00000162551	ALPL			0					0				0		0	0	0	0	0	0	0	0	0	0	0	0	0	0	0	0	0	0	0	0	0	0	0	0	0	0.6	0	0	alkaline phosphatase, liver/bone/kidney	249	protein_coding
ENSG00000076864	RAP1GAP			0					0				0		0	0	0	0	0	0	0	0	0	0	0	0	0	0	0	0	0	0	0	0	0	0	0	0	0	0.6	0	0.2	RAP1 GTPase activating protein	5909	protein_coding
ENSG00000090686	USP48			0					0			2388.4	3		0	422.417	507.9	365	394.4	0.2	7.5	1.7	1.3	5.5	1.2	0	25.4	1.4	3.9	9	0.5	0.9	1.6	0.1	1.5	0.4	286	419	61.4	26	65.7	6460.3	ubiquitin specific peptidase 48	84196	protein_coding
ENSG00000187942	LDLRAD2			0					0				0		0	0	0	0	0	0	0	0	0	0	0	0	0	0	0	0	0	0	0	0	0	0	0	0	0	0.3	0	0	low density lipoprotein receptor class A domain containing 2	401944	protein_coding
ENSG00000142798	HSPG2			0					0			1.6	4		0	0.339586	0.2	0	0.8	0	0	0	0	0	0	0	0	0	0	0	0	0	0	0	0	0	1	1.8	1.1	1.8	0.6	1.9	heparan sulfate proteoglycan 2	3339	protein_coding
ENSG00000219073	CELA3B			0					0			16.3	2		0	1.14192	1.4	1.2	0.8	0	0	0	0	0	0	0	0	0	0	0	0	0	0	0	0	0	23.3	0	0.2	0	0	9.4	chymotrypsin-like elastase family, member 3B	23436	protein_coding
ENSG00000142789	CELA3A			0					0			2.7	2		0	1.83225	1.4	1.9	2.2	0	0	0	0	0	0	0	0	0	0	0	0	0	0	0	0	0	3.6	0	0	0.3	0	1.7	chymotrypsin-like elastase family, member 3A	10136	protein_coding
ENSG00000070831	CDC42			0					0			153.9	1		0	228.669	219	224.5	242.4	1.7	2.7	0.8	1.6	1.4	1.1	2.5	4.9	1.5	2.6	2	2	1	0.7	0.6	1.3	0.3	2.5	153.9	17.9	20.9	1.2	1.4	cell division cycle 42	998	protein_coding
ENSG00000162552	WNT4			0					0				0		0	0	0	0	0	0	0	0	0	0	0	0	0	0	0	0	0	0	0	0	0	0	0.2	0	0.2	0	0	0	wingless-type MMTV integration site family, member 4	54361	protein_coding
ENSG00000184677	ZBTB40			0					0				0		0	10.9354	12.4	9.3	11.1	0	0	0	0	0	0	0	0	0	0	0.5	0	0	0	0	0	0	0.2	0	0	0.3	0.3	0.2	zinc finger and BTB domain containing 40	9923	protein_coding
ENSG00000070886	EPHA8			0					0				0		0	0	0	0	0	0	0	0	0	0	0	0	0	0	0	0	0	0	0	0	0	0	0.3	0	0	0	0	0	EPH receptor A8	2046	protein_coding
ENSG00000173372	C1QA			0					0			266.9	3		0	0.52078	0.2	0	1.4	0	0	0	0	0	0	0	0	0	0	0	0	0	0	0	0	0	32.9	332.7	0.4	0	0.3	435.1	complement component 1, q subcomponent, A chain	712	protein_coding
ENSG00000159189	C1QC			0					0				0		0	0	0	0	0	0	0	0	0	0	0	0	0	0	0	0	0	0	0	0	0	0	0	0	0	0	0.3	0	complement component 1, q subcomponent, C chain	714	protein_coding
ENSG00000173369	C1QB			0					0				0		0	0.0677956	0.2	0	0	0	0	0	0	0	0	0	0	0	0	0	0	0	0	0	0	0	0.3	0	0	0	0	0	complement component 1, q subcomponent, B chain	713	protein_coding
ENSG00000133216	EPHB2			0					0			1.2	1		0	0	0	0	0	0	0	0	0	0	0	0	0	0	0	0	0	0	0	0	0	0	0.3	0.5	0.5	0	1.2	0.2	EPH receptor B2	2048	protein_coding
ENSG00000215906	LACTBL1			0					0			5.4	1		0	0	0	0	0	0	0	0	0	0	0	0	0	0	0	0	0	0	0	0	0	0	0.8	0.5	0	5.4	0.9	1	lactamase, beta-like 1	646262	protein_coding
ENSG00000227868	C1orf234			0					0				0		0	1.57133	2.2	1.7	0.8	0	0	0	0.5	0.1	0	0	0	0	0	0.3	0	0	0	0	0	0	0	0	0.2	0	0	0	chromosome 1 open reading frame 234	729059	protein_coding
ENSG00000004487	KDM1A			0					0			43	3		0	111.311	92.1	114.9	126.9	0.3	1.5	0	3.1	0.4	0.1	0.1	2.6	1.3	0.5	0.8	0.1	0.4	0.4	0.2	0	0.1	16.7	42.4	31	6	55.7	7.2	lysine (K)-specific demethylase 1A	23028	protein_coding
ENSG00000169641	LUZP1			0					0				0		0	15.4711	19.5	9.5	17.4	0.2	0	0	0	0.1	0	0	0	0	0	0	0.1	0	0	0	0.1	0	0.2	0	0.2	0.3	0	0.7	leucine zipper protein 1	7798	protein_coding
ENSG00000179546	HTR1D			0					0				0		0	0	0	0	0	0	0	0	0	0	0	0	0	0	0	0	0	0	0	0	0	0	0	0	0	0	0	0.2	5-hydroxytryptamine (serotonin) receptor 1D, G protein-coupled	3352	protein_coding
ENSG00000125944	HNRNPR			0					0			17.6	1		0	48.576	30.5	43.2	72	0.2	1.8	0	0.1	0.3	0.1	0.3	0.5	0.5	0.9	0.5	0.1	0.3	0.3	0	0	0	1	0	0.2	17.6	1.5	3.1	heterogeneous nuclear ribonucleoprotein R	10236	protein_coding
ENSG00000125945	ZNF436			0					0				0		0	2.11363	2.2	3.6	0.5	0	0	0	0	0	0	0	0	0	0	0	0	0	0	0	0	0	0	0	0	0	0	0.5	zinc finger protein 436	80818	protein_coding
ENSG00000249087	C1orf213			0					0				0		0	0.146908	0.2	0.2	0	0	0	0	0	0	0	0	0	0	0	0	0	0	0	0	0	0	0	0	0	0	0	0	chromosome 1 open reading frame 213	148898	protein_coding
ENSG00000204219	TCEA3			0					0			23.6	1		0	6.12964	4.3	7.6	6.5	0	0	0	0.3	0	0	0.5	0.8	0	0	0.1	0.2	0	0	0	0.1	0	0.7	0	1.2	23.6	0	0.2	transcription elongation factor A (SII), 3	6920	protein_coding
ENSG00000088280	ASAP3			0					0				0		0	0.16971	0	0.2	0.3	0	0	0	0	0	0	0	0	0	0	0	0	0	0	0	0	0	0.7	0	0.2	0.3	0.6	0	ArfGAP with SH3 domain, ankyrin repeat and PH domain 3	55616	protein_coding
ENSG00000007968	E2F2			0					0				0		0	0	0	0	0	0	0	0	0	0	0	0	0	0	0	0	0	0	0	0	0	0	0.3	0	0	0	0.3	0	E2F transcription factor 2	1870	protein_coding
ENSG00000117318	ID3			0					0				0		0	0.509296	0.2	0.2	1.1	0	0	0	0	0	0	0	0	0	0	0	0	0	0	0	0	0	0	0	0	0.6	0	0	inhibitor of DNA binding 3, dominant negative helix-loop-helix protein	3399	protein_coding
ENSG00000197880	MDS2			0					0			1.7	2		0	0.0791126	0	0.2	0	0	0	0	0	0	0	0	0	0	0	0	0	0	0	0	0	0	0.2	0	0	0	2.1	1.2	myelodysplastic syndrome 2 translocation associated	NA	protein_coding
ENSG00000142676	RPL11			0					0			332.6	6		0	136.08	85.4	101.6	221.2	0.7	1.2	0	0.4	0.1	0	0.4	0.8	0.5	3.7	0.2	2.1	0.6	3.7	0.2	0.6	0.2	69.1	409.8	940.3	44.2	91.1	441.3	ribosomal protein L11	6135	protein_coding
ENSG00000011007	TCEB3			0					0				0		0	9.87114	10.8	10.7	8.2	0	0	0	0	0	0	0	0	0	0	0	0	0	0	0	0	0	0	0	0.4	0.9	0	0.2	transcription elongation factor B (SIII), polypeptide 3 (110kDa, elongin A)	6924	protein_coding
ENSG00000057757	PITHD1			0					0			63.1	5		0	49.5443	59.8	35.8	53	0	0.1	0.5	0.5	0.4	0	0.1	0.8	0.1	0.7	0.2	0.1	0.1	0.3	0	0	0	5	29.4	166.1	50.2	17.9	52.2	PITH (C-terminal proteasome-interacting domain of thioredoxin-like) domain containing 1	57095	protein_coding
ENSG00000011009	LYPLA2			0					0				0		0	0	0	0	0	0	0	0	0	0	0	0	0	0	0	0	0	0	0	0	0	0	0.2	0.3	0.2	0.3	0	0	lysophospholipase II	11313	protein_coding
ENSG00000117308	GALE			0					0				0		0	0	0	0	0	0	0	0	0	0	0	0	0	0	0	0	0	0	0	0	0	0	0.2	0	0	0.3	0	0	UDP-galactose-4-epimerase	2582	protein_coding
ENSG00000117305	HMGCL			0					0			14.5	1		0	25.153	15.9	31.3	28.3	0	0.1	0	0	0	0.8	0	0	0.3	0	0.4	0	0	0	0.1	0	0	14.5	0	1.4	4.8	0	0.2	3-hydroxymethyl-3-methylglutaryl-CoA lyase	3155	protein_coding
ENSG00000179163	FUCA1			0					0			161.8	2		0	331.245	334.6	368.3	290.8	1.4	4.1	0.2	0.9	0.7	0.1	1.1	5.1	1.3	18.4	10.5	0.7	1	1	0.5	1.7	0.1	17.5	192.2	131.4	14.3	2.4	4.3	fucosidase, alpha-L- 1, tissue	2517	protein_coding
ENSG00000188822	CNR2			0					0				0		0	0	0	0	0	0	0	0	0	0	0	0	0	0	0	0	0	0	0	0	0	0	0	0	0	0	0	0	cannabinoid receptor 2 (macrophage)	1269	protein_coding
ENSG00000189266	PNRC2			0					0				0		0	12.2788	15.3	12.3	9.2	0	0.1	0	0.1	0	0	0	0	0	0	0	0	0	0	0	0	0	0.2	0	0	0.9	0	0	proline-rich nuclear receptor coactivator 2	55629	protein_coding
ENSG00000188529	SRSF10			0					0				0		0	132.541	151.7	137.2	108.7	1.5	3.1	0	1.4	1.3	0.1	0.4	1	0	3.6	0.4	0.5	0	0.4	0	0	0	9.9	17	8.7	12	8.5	5.8	serine/arginine-rich splicing factor 10	10772	protein_coding
ENSG00000142661	MYOM3			0					0				0		0	0.0791126	0	0.2	0	0	0	0	0	0	0	0	0	0	0	0	0	0	0	0	0	0	0.2	0	0.4	0	0	0.5	myomesin 3	127294	protein_coding
ENSG00000142677	IL22RA1			0					0				0		0	0.0677956	0.2	0	0	0	0	0	0	0	0	0	0	0	0	0	0	0	0	0	0	0	0.2	0	0.4	0.3	0.3	0.2	interleukin 22 receptor, alpha 1	58985	protein_coding
ENSG00000185436	IFNLR1			0					0				0		0	0	0	0	0	0	0	0	0	0	0	0	0	0	0	0	0	0	0	0	0	0	0	0	0.2	0.3	0	0	interferon, lambda receptor 1	163702	protein_coding
ENSG00000158055	GRHL3			0					0				0		0	0.983196	0.8	2.1	0	0	0	0	0	0	0.1	0	0	0	0	0	0	0.3	0	0	0	0	0.8	0	0	0.3	0.3	0	grainyhead-like 3 (Drosophila)	57822	protein_coding
ENSG00000001460	STPG1			0					0			22.7	1		0	80.857	76.1	68.1	98.4	0	0	0	1.4	0.2	0	0.4	13.7	0.1	0.9	0	0	0.6	1	0	0.4	0	0.3	0.3	0	4.5	22.7	0.2	sperm-tail PG-rich repeat containing 1	90529	protein_coding
ENSG00000001461	NIPAL3			0					0			483.2	6		0	6.07339	5.7	5.5	7.1	0	0	0	0	0	0.3	0	0	0	0.3	0	0	0.1	0	0	0	0	305.1	16.2	177.4	21.5	1227.5	1151.6	NIPA-like domain containing 3	57185	protein_coding
ENSG00000117602	RCAN3			0					0				0		0	0.135591	0.4	0	0	0	0.1	0	0	0	0	0	0	0	0	0	0	0	0	0	0	0	0	0	0.2	0.3	0	0	RCAN family member 3	11123	protein_coding
ENSG00000184454	NCMAP			0					0				0		0	0	0	0	0	0	0	0	0	0	0	0	0	0	0	0	0	0	0	0	0	0	0	0	0	0	0	0	noncompact myelin associated protein	400746	protein_coding
ENSG00000133226	SRRM1			0					0			24.1	1		0	28.2026	18.9	23	42.7	0.8	1.5	0.2	0	0.5	0	0	0	0.1	1.2	1.6	0.1	0	0.3	0	0	0.2	24.1	0.3	1.4	0.9	1.8	1.7	serine/arginine repetitive matrix 1	10250	protein_coding
ENSG00000169504	CLIC4			0					0			63	1		0	26.3967	34	31.1	14.1	0	0	0	0	0.1	0.1	1.1	1.2	1.2	0.5	0.5	0.2	0	0.3	0	0.4	0	0.8	1.3	0	2.1	63	0.7	chloride intracellular channel 4	25932	protein_coding
ENSG00000020633	RUNX3			0					0			1.2	1		0	0	0	0	0	0	0	0	0	0	0	0	0	0	0	0	0	0	0	0	0	0	0.5	0	0	1.2	0	0	runt-related transcription factor 3	864	protein_coding
ENSG00000117614	SYF2			0					0			60	1		0	87.6245	81.8	85.4	95.7	0.6	5.2	0.6	0.3	2.8	0.1	0.7	0.2	0.2	3.7	1.6	0.1	0.1	0.5	0	0.5	0	0.7	0.3	60	9	1.2	2.6	SYF2 pre-mRNA-splicing factor	25949	protein_coding
ENSG00000117616	C1orf63			0					0			42.1	1		0	82.4738	115.1	62.2	70.1	1.8	6.2	0.9	1.1	1.6	0.5	0.5	13.8	1.4	3.9	5.7	0.3	1.2	0.4	0.2	0.4	0	8.8	1.8	5.1	12.8	42.1	10.8	chromosome 1 open reading frame 63	57035	protein_coding
ENSG00000187010	RHD			0					0			1.2	1		0	0.689547	0.6	1.2	0.3	0	0	0	0	0	0	0	0.2	0	0	0	0	0	0	0	0	0	0.2	0.3	0	1.2	0	0	Rh blood group, D antigen	6007	protein_coding
ENSG00000188672	RHCE			0					0				0		0	0.882392	0.8	0.5	1.4	0	0	0	0	0	0	0	0	0	0	0	0	0	0	0	0	0	0	0.5	0.2	0	0	0	Rh blood group, CcEe antigens	6006	protein_coding
ENSG00000204178	TMEM57			0					0				0		0	119.985	135.3	101.6	123.1	1.7	0.6	0.6	0	0.7	0.4	1.3	0.3	0.1	0.2	1	0.2	1.2	1	0.6	0.1	0.4	3.1	0.3	0.4	3.6	0.3	2.2	transmembrane protein 57	55219	protein_coding
ENSG00000157978	LDLRAP1			0					0				0		0	0	0	0	0	0	0	0	0	0	0	0	0	0	0	0	0	0	0	0	0	0	0	0	0	0	0	0	low density lipoprotein receptor adaptor protein 1	26119	protein_coding
ENSG00000117643	MAN1C1			0					0				0		0	0	0	0	0	0	0	0	0	0	0	0	0	0	0	0	0	0	0	0	0	0	0.3	0	0	0	0.3	0	mannosidase, alpha, class 1C, member 1	57134	protein_coding
ENSG00000162430	SEPN1			0					0				0		0	0	0	0	0	0	0	0	0	0	0	0	0	0	0	0	0	0	0	0	0	0	0	0	0.4	0.6	0.3	0.2	selenoprotein N, 1	57190	protein_coding
ENSG00000255054	RP1-317E23.6			0					0				0		0	0.0677956	0.2	0	0	0	0	0	0	0	0	0	0	0	0	0	0	0	0	0	0	0	0	0	0	0	0	0	Uncharacterized protein	NA	protein_coding
ENSG00000117640	MTFR1L			0					0				0		0	48.619	42.5	50.1	53.3	0	0	0.2	0.6	0.1	0	0.1	2	0.7	1	0.8	0	0	0.3	0	0	0	0.7	0	0.2	1.5	0.9	0	mitochondrial fission regulator 1-like	56181	protein_coding
ENSG00000223474	AL020996.1			0					0				0		0	0	0	0	0	0	0	0	0	0	0	0	0	0	0	0	0	0	0	0	0	0	0	0.8	0	0	0	0	Uncharacterized protein	NA	protein_coding
ENSG00000127423	AUNIP			0					0				0		0	72.5719	57.6	98.7	61.4	0.1	0	0.2	0.6	0.6	0.2	0.2	2	1.1	1	0.3	0.3	0.4	0.4	0	0	0.3	0	0	0	1.5	0.9	0	aurora kinase A and ninein interacting protein	79000	protein_coding
ENSG00000182749	PAQR7			0					0				0		0	0	0	0	0	0	0	0	0	0	0	0	0	0	0	0	0	0	0	0	0	0	0.3	0	0	0	0	0	progestin and adipoQ receptor family member VII	164091	protein_coding
ENSG00000117632	STMN1			0					0				0		0	737.397	654.1	813.1	745	9.1	13.8	1.1	4.9	1.6	1.6	5.2	17.6	5	21.1	10.8	4.5	3.9	5.5	0.2	3.9	0.1	104.6	14.5	5.3	25.4	15.1	18.5	stathmin 1	3925	protein_coding
ENSG00000158006	PAFAH2			0					0				0		0	0.293984	0.6	0	0.3	0	0	0	0	0	0	0	0	0	0	0	0	0	0	0	0	0	0.5	0.5	0.2	0	0.3	0	platelet-activating factor acetylhydrolase 2, 40kDa	5051	protein_coding
ENSG00000158008	EXTL1			0					0				0		0	0	0	0	0	0	0	0	0	0	0	0	0	0	0	0	0	0	0	0	0	0	0	0.3	0.2	0	0.3	0.2	exostosin-like glycosyltransferase 1	2134	protein_coding
ENSG00000158014	SLC30A2			0					0				0		0	0.0905969	0	0	0.3	0	0	0	0	0	0	0	0	0	0	0	0	0	0	0	0	0	0	0.3	0	0	0	0	solute carrier family 30 (zinc transporter), member 2	7780	protein_coding
ENSG00000158022	TRIM63			0					0				0		0	0	0	0	0	0	0	0	0	0	0	0	0	0	0	0	0	0	0	0	0	0	0.2	0	0	0	0.3	0	tripartite motif containing 63, E3 ubiquitin protein ligase	84676	protein_coding
ENSG00000175087	PDIK1L			0					0				0		0	0	0	0	0	0	0	0	0	0	0	0	0	0	0	0	0	0	0	0	0	0	0.2	0.3	0	0	0.3	0	PDLIM1 interacting kinase 1 like	149420	protein_coding
ENSG00000197245	FAM110D			0					0				0		0	0	0	0	0	0	0	0	0	0	0	0	0	0	0	0	0	0	0	0	0	0	0.2	0	0	0	0	0	family with sequence similarity 110, member D	79927	protein_coding
ENSG00000142684	ZNF593			0					0				0		0	0	0	0	0	0	0	0	0	0	0	0	0	0	0	0	0	0	0	0	0	0	0	0	0	0	0	0	zinc finger protein 593	51042	protein_coding
ENSG00000142675	CNKSR1			0					0				0		0	0	0	0	0	0	0	0	0	0	0	0	0	0	0	0	0	0	0	0	0	0	0.2	0.3	0	0	0	0	connector enhancer of kinase suppressor of Ras 1	10256	protein_coding
ENSG00000188782	CATSPER4			0					0				0		0	0	0	0	0	0	0	0	0	0	0	0	0	0	0	0	0	0	0	0	0	0	0	0.5	0	0.3	0	0	cation channel, sperm associated 4	378807	protein_coding
ENSG00000142669	SH3BGRL3			0					0				0		0	1.93416	1.2	2.1	2.4	0	0	0	0	0	0	0	0	0	0	0	0	0	0	0	0	0	0	0	0	0	0.3	0	SH3 domain binding glutamic acid-rich protein like 3	83442	protein_coding
ENSG00000158062	UBXN11			0					0				0		0	0	0	0	0	0	0	0	0	0	0	0	0	0	0	0	0	0	0	0	0	0	0.2	0.3	0	0	0	0	UBX domain protein 11	91544	protein_coding
ENSG00000169442	CD52			0					0				0		0	15.8929	9.6	16.4	21.7	0.3	1.2	0	0.2	0	0	0	0.2	0.1	1.4	0.4	0	0.3	0.1	0.1	0	0	0.7	0	3.4	3.9	3	0.5	CD52 molecule	1043	protein_coding
ENSG00000176092	AIM1L			0					0				0		0	0	0	0	0	0	0	0	0	0	0	0	0	0	0	0	0	0	0	0	0	0	0.5	0	0.5	0.3	0.3	0.2	absent in melanoma 1-like	55057	protein_coding
ENSG00000176083	ZNF683			0					0				0		0	0.0677956	0.2	0	0	0	0	0	0	0	0	0	0	0	0	0	0	0	0	0	0	0	0	0	0	0	0	0	zinc finger protein 683	257101	protein_coding
ENSG00000131914	LIN28A			0					0				0		0	0.407382	0.4	0	0.8	0	0	0	0	0	0	0	0	0	0	0	0	0	0	0	0	0	0	0	0	0	0	0.2	lin-28 homolog A (C. elegans)	79727	protein_coding
ENSG00000117682	DHDDS			0					0				0		0	10.3838	7.3	10	13.9	0	0.5	0	0	0	0.3	0	0	0	0.7	0	0	0.1	0	0	0.1	0	0	0	0	0.3	0	0	dehydrodolichyl diphosphate synthase	79947	protein_coding
ENSG00000198830	HMGN2			0					0			2.8	1		0	4.90822	5.5	3.8	5.4	0	0	0	0	0	0	0	0.5	0	0.2	0.1	0.2	0	0.1	0	0	0	0.5	2.8	0.2	0.6	0	0.2	high mobility group nucleosomal binding domain 2	3151	protein_coding
ENSG00000117676	RPS6KA1			0					0			37.2	4		0	0	0	0	0	0	0	0	0	0	0	0	0	0	0	0	0	0	0	0	0	0	3.5	0.3	0.7	47.5	25.1	72.8	ribosomal protein S6 kinase, 90kDa, polypeptide 1	6195	protein_coding
ENSG00000117713	ARID1A			0					0			178.1	5		0	3.36946	4.1	3.3	2.7	0	0.4	0	0	0	0	0	0	0	0.2	0	0	0	0	0	0	0	71.6	14.2	51.7	0.9	536.4	216.6	AT rich interactive domain 1A (SWI-like)	8289	protein_coding
ENSG00000060642	PIGV			0					0			1335.6	3		0	160.498	96	188.4	197	2.6	1.4	0.5	2.2	0.6	0	0.2	0.7	0.7	2.9	1.3	0	1	0.5	0.4	1.3	0.1	64.3	0.5	1.4	8.4	3356.3	586.2	phosphatidylinositol glycan anchor biosynthesis, class V	55650	protein_coding
ENSG00000204160	ZDHHC18			0					0				0		0	0.0791126	0	0.2	0	0	0	0	0	0	0	0	0	0	0	0	0	0	0	0	0	0	0.2	0	0	0	0	0	zinc finger, DHHC-type containing 18	84243	protein_coding
ENSG00000175793	SFN			0					0				0		0	0	0	0	0	0	0	0	0	0	0	0	0	0	0	0	0	0	0	0	0	0	0.2	0	0	0	0	0	stratifin	2810	protein_coding
ENSG00000142751	GPN2			0					0				0		0	4.1952	4.3	4.5	3.8	0	0	0	0.1	0.2	0	0	0	0	0	0	0.1	0	0	0	0	0	0.2	0.5	0.2	0	0.3	0	GPN-loop GTPase 2	54707	protein_coding
ENSG00000198746	GPATCH3			0					0				0		0	0	0	0	0	0	0	0	0	0	0	0	0	0	0	0	0	0	0	0	0	0	0.2	0	0	0	0	0.2	G patch domain containing 3	63906	protein_coding
ENSG00000090273	NUDC			0					0			2.9	1		0	3.03203	1.8	2.4	4.9	0	0	0	0	0	0	0	0	0	0	0	0	0	0	0	0.4	0	0.3	0.3	0	0.6	0	2.9	nudC nuclear distribution protein	10726	protein_coding
ENSG00000131910	NR0B2			0					0				0		0	0.735484	0.6	0.2	1.4	0	0	0	0	0	0	0	0	0	0	0	0	0	0	0	0	0	0	0	0	0	0	0	nuclear receptor subfamily 0, group B, member 2	8431	protein_coding
ENSG00000175707	C1orf172			0					0				0		0	0.135591	0.4	0	0	0	0	0	0	0	0	0	0	0	0	0	0	0	0	0	0	0	0.2	0	0	0.3	0	0	chromosome 1 open reading frame 172	126695	protein_coding
ENSG00000253368	TRNP1			0					0				0		0	0	0	0	0	0	0	0	0	0	0	0	0	0	0	0	0	0	0	0	0	0	0	0.3	0	0.6	0.3	0.2	TMF1-regulated nuclear protein 1	388610	protein_coding
ENSG00000158246	FAM46B			0					0				0		0	0	0	0	0	0	0	0	0	0	0	0	0	0	0	0	0	0	0	0	0	0	0	0	0	0	0	0	family with sequence similarity 46, member B	115572	protein_coding
ENSG00000090020	SLC9A1			0					0				0		0	0	0	0	0	0	0	0	0	0	0	0	0	0	0	0	0	0	0	0	0	0	0	0.5	0.4	0	0	0.2	solute carrier family 9, subfamily A (NHE1, cation proton antiporter 1), member 1	6548	protein_coding
ENSG00000142784	WDTC1			0					0				0		0	0	0	0	0	0	0	0	0	0	0	0	0	0	0	0	0	0	0	0	0	0	0	0	0	0	0	0	WD and tetratricopeptide repeats 1	23038	protein_coding
ENSG00000186501	TMEM222			0					0				0		0	0	0	0	0	0	0	0	0	0	0	0	0	0	0	0	0	0	0	0	0	0	0	0	0	0.3	0	0	transmembrane protein 222	84065	protein_coding
ENSG00000142765	SYTL1			0					0				0		0	0	0	0	0	0	0	0	0	0	0	0	0	0	0	0	0	0	0	0	0	0	0	0.5	0	0.3	0	0.5	synaptotagmin-like 1	84958	protein_coding
ENSG00000142733	MAP3K6			0					0			1.5	1		0	0.0791126	0	0.2	0	0	0	0	0	0	0	0	0	0	0	0	0	0	0	0	0	0	0.7	0	0.2	1.5	0.3	0.7	mitogen-activated protein kinase kinase kinase 6	9064	protein_coding
ENSG00000142748	FCN3			0					0			19.6	2		0	24.4159	19.5	28.7	25	0	0	0	0.1	0.1	0	0.1	1.6	0	0	0	0.2	0	0	0	0	0	1.3	0.3	0.4	24.8	0	14.4	ficolin (collagen/fibrinogen domain containing) 3	8547	protein_coding
ENSG00000174950	CD164L2			0					0				0		0	0	0	0	0	0	0	0	0	0	0	0	0	0	0	0	0	0	0	0	0	0	0	0	0	0	0	0	CD164 sialomucin-like 2	388611	protein_coding
ENSG00000181773	GPR3			0					0				0		0	0	0	0	0	0	0	0	0	0	0	0	0	0	0	0	0	0	0	0	0	0	0	0	0	0	0	0	G protein-coupled receptor 3	2827	protein_coding
ENSG00000158195	WASF2			0					0				0		0	0.80328	0.8	0.2	1.4	0	0	0	0	0	0	0.1	0.5	0.1	0	0	0	0	0	0	0	0	0.2	0	0	0	0	0	WAS protein family, member 2	10163	protein_coding
ENSG00000126705	AHDC1			0					0			1.4	2		0	0	0	0	0	0	0	0	0	0	0	0	0	0	0	0	0	0	0	0	0	0	0.3	1	0.4	0.9	1.8	0.5	AT hook, DNA binding motif, containing 1	27245	protein_coding
ENSG00000000938	FGR			0					0			39.1	1		0	4.09312	4.3	4.7	3.3	0	0	0	0	0	0	0	0	0	0	0	0	0	0.1	0	0	0	0.8	0.3	0	0	39.1	0.5	feline Gardner-Rasheed sarcoma viral oncogene homolog	2268	protein_coding
ENSG00000126709	IFI6			0					0				0		0	0.226021	0.2	0.5	0	0	0	0	0	0	0	0	0	0	0	0	0	0	0	0	0	0	0.2	0	0	0.3	0.3	0	interferon, alpha-inducible protein 6	2537	protein_coding
ENSG00000009780	FAM76A			0					0				0		0	24.9601	21.8	25.4	27.7	0	1.4	0	0	0	0	0	0	0	0	0	0.6	0.1	0	0	0	0	0.3	0	0.2	0	0	0	family with sequence similarity 76, member A	199870	protein_coding
ENSG00000117758	STX12			0					0				0		0	25.0708	15.3	19.5	40.5	0.1	0.5	0	0.1	0	0	0	0.2	0	0.2	0.4	0	0.6	0	0	0	0	0.2	0	1.1	0.9	0	0.5	syntaxin 12	23673	protein_coding
ENSG00000117751	PPP1R8			0					0				0		0	2.6363	1.6	1.7	4.6	0	0	0	0	0	0	0	0	0	0	0	0	0	0	0	0	0	0	0.5	0	0	0	0.5	protein phosphatase 1, regulatory subunit 8	5511	protein_coding
ENSG00000268552	AL109927.1			0					0			73.1	1		0	53.2134	54.3	58.9	46.5	0.5	0.8	0.2	0.1	0	0.2	0.7	2.3	0.5	1.9	1.2	0	0.3	0.4	0	0.4	0.1	0.8	0.3	2.3	1.5	0.6	73.1	HCG2032222; PRO2047; Uncharacterized protein	NA	protein_coding
ENSG00000130775	THEMIS2			0					0				0		0	0.440725	0.6	0.7	0	0	0	0	0	0	0	0	0.3	0	0	0	0	0	0	0	0	0	0	0	0.4	0.6	0	0.2	thymocyte selection associated family member 2	9473	protein_coding
ENSG00000117748	RPA2			0					0				0		0	154.553	140.9	171.6	151.1	1.2	1.2	0.2	0.3	0.3	0.2	5	0.7	1	3.4	1.5	0.5	1	0.2	0	0.1	0	0.3	2	0.4	3.3	0.9	0.2	replication protein A2, 32kDa	6118	protein_coding
ENSG00000130768	SMPDL3B			0					0			1.2	1		0	0.0677956	0.2	0	0	0	0	0	0	0	0	0	0	0	0	0	0	0	0	0	0	0	0.2	0.3	0.2	0	0.9	1.2	sphingomyelin phosphodiesterase, acid-like 3B	27293	protein_coding
ENSG00000158156	XKR8			0					0				0		0	0.158225	0	0.5	0	0	0	0	0	0	0	0	0	0	0	0	0	0	0	0	0	0	0.3	0	0	0	0	0	XK, Kell blood group complex subunit-related family, member 8	55113	protein_coding
ENSG00000158161	EYA3			0					0				0		0	89.6876	84.6	96.1	88.3	0	0	0.5	0.3	0	1.1	1.1	4.8	0.9	0.9	1.6	0	0	0.1	0	0.4	0	0.5	0	0.4	5.7	2.1	0.7	eyes absent homolog 3 (Drosophila)	2140	protein_coding
ENSG00000169403	PTAFR			0					0				0		0	0	0	0	0	0	0	0	0	0	0	0	0	0	0	0	0	0	0	0	0	0	0	0	0	0	0	0	platelet-activating factor receptor	5724	protein_coding
ENSG00000126698	DNAJC8			0					0				0		0	181.884	152.7	201	191.9	0.9	2.6	0.3	0.7	0.1	0.5	0.8	2.1	1.8	2.7	2.2	0.3	0.3	0.7	0	0.5	0.1	0.3	0	0.5	4.2	0	1.2	DnaJ (Hsp40) homolog, subfamily C, member 8	22826	protein_coding
ENSG00000215902	AL353354.1			0					0				0		0	51.8537	42.5	56.2	56.8	0.5	0.5	0	0.3	0	0.1	0	0.2	0.2	0.2	0.2	0	0.1	0.2	0	0.4	0.1	0.3	0	0.2	6.9	0	0.2	Uncharacterized protein	NA	protein_coding
ENSG00000269804	AL353354.2			0					0				0		0	69.0992	69.2	63.1	75	0.6	0.3	0	0.6	0	0	0	0.8	1	0.5	0.5	0.3	0.1	0.2	0	0.3	0	1	0	0.5	16.4	0.3	1.2		NA	protein_coding
ENSG00000130770	ATPIF1			0					0			78.5	3		0	104.16	144.8	97.5	70.1	0	5.4	0.2	1.4	1.4	0.2	0.8	4.3	0.2	4.1	1.4	0.1	0	0.3	0.1	0	0	39.8	83.7	111.9	2.7	0.9	4.6	ATPase inhibitory factor 1	93974	protein_coding
ENSG00000130766	SESN2			0					0				0		0	0	0	0	0	0	0	0	0	0	0	0	0	0	0	0	0	0	0	0	0	0	0.2	0	0.2	0	0	0.2	sestrin 2	83667	protein_coding
ENSG00000130772	MED18			0					0			3.1	1		0	10.4727	8.3	11.4	11.7	0	0.1	0	0	0	0	0	1.5	0	0.2	0.2	0	0	0	0	0.1	0	3.1	0	0	0.9	0	0.5	mediator complex subunit 18	54797	protein_coding
ENSG00000204138	PHACTR4			0					0			2.1	1		0	7.49957	3.7	8.8	10.1	0	0	0	0.3	0	0	0.1	0.3	0.7	0	0	0	0	0	0	0.1	0	0.8	0.5	0.2	0.3	2.1	0.7	phosphatase and actin regulator 4	65979	protein_coding
ENSG00000180198	RCC1			0					0				0		0	0.39573	0.2	0.7	0.3	0	0	0	0	0	0.1	0	0	0	0	0	0	0	0	0	0	0	0	0	0	0.3	0	0	regulator of chromosome condensation 1	1104	protein_coding
ENSG00000180098	TRNAU1AP			0					0				0		0	220.835	131.4	250.6	280.5	0.8	1.3	0.5	2	0.2	0.1	1.2	9.9	2.4	3.6	2.6	0.1	0.1	0.1	0.3	0.5	0.1	25	1.5	2.7	8.4	36.3	4.1	tRNA selenocysteine 1 associated protein 1	54952	protein_coding
ENSG00000120656	TAF12			0					0				0		0	302.857	266.8	288.1	353.6	1.5	10.2	0.9	3.1	2.3	0.7	3.3	9.4	1.8	4.1	6.9	0.7	1.9	1	0.4	2.2	0.5	4.5	2.5	2.5	14.6	0.9	7.7	TAF12 RNA polymerase II, TATA box binding protein (TBP)-associated factor, 20kDa	6883	protein_coding
ENSG00000188060	RAB42			0					0				0		0	0	0	0	0	0	0	0	0	0	0	0	0	0	0	0	0	0	0	0	0	0	0	0	0.2	0	0	0	RAB42, member RAS oncogene family	115273	protein_coding
ENSG00000162419	GMEB1			0					0			2.6	1		0	7.49725	5.5	10.2	6.8	0	0	0	0	0	0	0.1	0	0.1	0	0	0	0.1	0	0	0	0	0.2	0	0	0.6	0	2.6	glucocorticoid modulatory element binding protein 1	10691	protein_coding
ENSG00000198492	YTHDF2			0					0				0		0	256.245	200.1	262	306.6	0.5	2.1	0.3	0.7	1.3	0.3	1.7	5.8	2.7	5.5	6.4	1.5	0.4	1	2.1	1.2	0.7	3.6	0	1.1	6	1.8	1.2	YTH domain family, member 2	51441	protein_coding
ENSG00000116329	OPRD1			0					0				0		0	0	0	0	0	0	0	0	0	0	0	0	0	0	0	0	0	0	0	0	0	0	0.2	0	0	0	0.3	0	opioid receptor, delta 1	4985	protein_coding
ENSG00000159023	EPB41			0					0				0		0	9.65382	8.7	16.1	4.1	0	0	0	0.1	0	0	0	0	0	0	0	0	0	0	0	0.1	0	0.5	0.3	0.2	0.6	0	0	erythrocyte membrane protein band 4.1 (elliptocytosis 1, RH-linked)	2035	protein_coding
ENSG00000253304	TMEM200B			0					0				0		0	0	0	0	0	0	0	0	0	0	0	0	0	0	0	0	0	0	0	0	0	0	0.3	0	0.2	0	0	0	transmembrane protein 200B	399474	protein_coding
ENSG00000116350	SRSF4			0					0			50.9	2		0	16.7188	10	17.1	23.1	0	0	0	0	0	0	0.2	0	0.2	0.2	0	0	0.1	0.1	0	0	0.1	81.2	0.3	20.5	3	2.1	2.4	serine/arginine-rich splicing factor 4	6429	protein_coding
ENSG00000116353	MECR			0					0				0		0	0.813988	1.4	0.5	0.5	0	0	0	0	0	0	0	0	0	0	0	0	0	0	0	0	0	0	0	0	0	0.3	0	mitochondrial trans-2-enoyl-CoA reductase	51102	protein_coding
ENSG00000060656	PTPRU			0					0				0		0	0	0	0	0	0	0	0	0	0	0	0	0	0	0	0	0	0	0	0	0	0	0	0.8	0	0	0.6	0.7	protein tyrosine phosphatase, receptor type, U	10076	protein_coding
ENSG00000162510	MATN1			0					0				0		0	0	0	0	0	0	0	0	0	0	0	0	0	0	0	0	0	0	0	0	0	0	0.2	0.3	0	0	0.6	0	matrilin 1, cartilage matrix protein	4146	protein_coding
ENSG00000162511	LAPTM5			0					0				0		0	0	0	0	0	0	0	0	0	0	0	0	0	0	0	0	0	0	0	0	0	0	0	0	0	0	0	0	lysosomal protein transmembrane 5	7805	protein_coding
ENSG00000162512	SDC3			0					0				0		0	0	0	0	0	0	0	0	0	0	0	0	0	0	0	0	0	0	0	0	0	0	0.2	0.5	0	0	0	0.2	syndecan 3	9672	protein_coding
ENSG00000134644	PUM1			0					0				0		0	142.34	108.4	147.4	171.2	0.7	1.7	0.9	0.8	0.2	0.1	0.4	3.3	0.7	2.4	0	0.2	0	1.8	0.1	0.3	0	2	10.9	4.1	6.3	1.8	1.4	pumilio RNA-binding family member 1	9698	protein_coding
ENSG00000084628	NKAIN1			0					0				0		0	0	0	0	0	0	0	0	0	0	0	0	0	0	0	0	0	0	0	0	0	0	0	0	0	0	0	0	Na+/K+ transporting ATPase interacting 1	79570	protein_coding
ENSG00000060688	SNRNP40			0					0			34.8	1		0	44.9986	28.1	44.1	62.8	0	0.4	0.6	0	0	0.8	0.1	2	0	0.5	0.5	0.3	0	0	0	0	0	1.3	0	5.1	0.6	34.8	0.5	small nuclear ribonucleoprotein 40kDa (U5)	9410	protein_coding
ENSG00000121766	ZCCHC17			0					0				0		0	337.332	255.3	364.6	392.2	0.3	0.9	0.2	4	1.7	1.7	2.6	1.8	1.7	1.4	1.1	0.7	0.9	0.8	0.3	1.3	0.1	3.3	6.8	1.1	7.8	1.5	2.6	zinc finger, CCHC domain containing 17	51538	protein_coding
ENSG00000121769	FABP3			0					0				0		0	145.439	108.8	136.7	190.8	1	1.8	0	1.7	0.4	0.3	1.4	7.6	2.6	2	2.3	1	1.9	0.6	0.1	0.4	0.4	7.4	0	5.3	20.3	2.1	8.9	fatty acid binding protein 3, muscle and heart (mammary-derived growth inhibitor)	2170	protein_coding
ENSG00000168528	SERINC2			0					0				0		0	0.0677956	0.2	0	0	0	0	0	0	0	0	0	0	0	0	0	0	0	0	0	0	0	0	0	0	0	0.3	0	serine incorporator 2	347735	protein_coding
ENSG00000268950	AC114494.1			0					0				0		0	0	0	0	0	0	0	0	0	0	0	0	0	0	0	0	0	0	0	0	0	0	0	0	0	0.3	0	0	HCG1787699; Uncharacterized protein	NA	protein_coding
ENSG00000142910	TINAGL1			0					0				0		0	0	0	0	0	0	0	0	0	0	0	0	0	0	0	0	0	0	0	0	0	0	0.3	0.3	0	0.3	0	0.5	tubulointerstitial nephritis antigen-like 1	64129	protein_coding
ENSG00000121764	HCRTR1			0					0			1.2	1		0	0	0	0	0	0	0	0	0	0	0	0	0	0	0	0	0	0	0	0	0	0	0.5	0.3	0	0.3	0	1.2	hypocretin (orexin) receptor 1	3061	protein_coding
ENSG00000162517	PEF1			0					0			15.4	5		0	9.12816	5.7	9.7	12	0	0	0.6	0	0	0	0	0.2	0	0.3	0.7	0	0	0	0	0	0	43.3	6.1	5.5	17.3	0.3	4.8	penta-EF-hand domain containing 1	553115	protein_coding
ENSG00000084636	COL16A1			0					0			2.3	2		0	0	0	0	0	0	0	0	0	0	0	0	0	0	0	0	0	0	0	0	0	0	0.3	0.8	0.4	2.1	2.4	0.5	collagen, type XVI, alpha 1	1307	protein_coding
ENSG00000121753	BAI2			0					0				0		0	0	0	0	0	0	0	0	0	0	0	0	0	0	0	0	0	0	0	0	0	0	0.2	0	0	0.3	0.3	0	brain-specific angiogenesis inhibitor 2	576	protein_coding
ENSG00000134668	SPOCD1			0					0				0		0	0.0791126	0	0.2	0	0	0	0	0	0	0	0	0	0	0	0	0	0	0	0	0	0	0.5	0	0.2	0.3	0.3	0.5	SPOC domain containing 1	90853	protein_coding
ENSG00000212673	AL136115.1			0					0				0		0	0	0	0	0	0	0	0	0	0	0	0	0	0	0	0	0	0	0	0	0	0	0.3	0.8	0	0	0	0	HCG2032337; PRO1848; Uncharacterized protein	NA	protein_coding
ENSG00000121774	KHDRBS1			0					0				0		0	25.354	26	24.2	25.8	0	0	0.2	0.1	0.2	0	0	0.2	0.8	0.5	0.6	0.1	0	0.1	0	0	0	0.8	0.3	2.1	2.4	0.6	0.2	KH domain containing, RNA binding, signal transduction associated 1	10657	protein_coding
ENSG00000121775	TMEM39B			0					0				0		0	0.260306	0	0.2	0.5	0	0	0	0	0	0	0	0	0	0	0	0	0	0	0	0	0	0	0.3	0.2	0	0	0	transmembrane protein 39B	55116	protein_coding
ENSG00000025800	KPNA6			0					0				0		0	0.928162	0.6	0	2.2	0	0	0	0	0	0	0	0	0	0	0	0	0	0	0	0	0	0	0	0	0	0	0	karyopherin alpha 6 (importin alpha 7)	23633	protein_coding
ENSG00000084652	TXLNA			0					0				0		0	0	0	0	0	0	0	0	0	0	0	0	0	0	0	0	0	0	0	0	0	0	0.2	0.3	0	0	0	0	taxilin alpha	200081	protein_coding
ENSG00000160050	CCDC28B			0					0			8.1	1		0	0	0	0	0	0	0	0	0	0	0	0	0	0	0	0	0	0	0	0	0	0	0.3	0.3	0.2	8.1	0.3	0.2	coiled-coil domain containing 28B	79140	protein_coding
ENSG00000160051	IQCC			0					0				0		0	0	0	0	0	0	0	0	0	0	0	0	0	0	0	0	0	0	0	0	0	0	0	0	0.2	0.3	0	0.5	IQ motif containing C	55721	protein_coding
ENSG00000222046	DCDC2B			0					0				0		0	0.214704	0.4	0.2	0	0	0	0	0	0	0	0	0	0	0	0	0	0	0	0	0	0	0	0	0.2	0.3	0	0.2	doublecortin domain containing 2B	149069	protein_coding
ENSG00000160055	TMEM234			0					0				0		0	2.75913	2	3.8	2.4	0	0	0	0	0.1	0	0	0	0	0	0	0	0	0	0	0	0	0.3	0	0.2	0	0	1	transmembrane protein 234	56063	protein_coding
ENSG00000084623	EIF3I			0					0			3	1		0	3.39364	2.4	2.8	4.9	0	0	0	0	0	0	0	0	0	0.7	0.1	0	0	0	0	0	0	0	0	0.2	0	3	0.2	eukaryotic translation initiation factor 3, subunit I	8668	protein_coding
ENSG00000183615	FAM167B			0					0				0		0	0	0	0	0	0	0	0	0	0	0	0	0	0	0	0	0	0	0	0	0	0	0	0	0	0	0.3	0.2	family with sequence similarity 167, member B	84734	protein_coding
ENSG00000182866	LCK			0					0				0		0	0.47501	0.4	0.5	0.5	0	0	0	0	0	0	0	0	0	0	0	0	0	0	0	0	0	0	0	0	0	0	0	lymphocyte-specific protein tyrosine kinase	3932	protein_coding
ENSG00000116478	HDAC1			0					0				0		0	73.0593	52.9	86.4	79.9	0.7	2.3	0.3	2.2	0.1	0.3	1.4	1.2	0.7	0.2	0	0.3	0	0.7	0	0.1	0.1	0.3	0.3	0	1.2	1.2	0	histone deacetylase 1	3065	protein_coding
ENSG00000175130	MARCKSL1			0					0				0		0	2.34171	1.8	1.7	3.5	0	0	0	0	0	0	0.1	0	0	0.2	0	0	0	0	0	0	0	0	0	0	0	0	0	MARCKS-like 1	65108	protein_coding
ENSG00000162526	TSSK3			0					0			2.5	1		0	8.73226	5.3	9.5	11.4	0	0	0	0	0	0	0	0	0	0.2	0	0	0	0	0	0	0	0.2	0	2.5	0.6	0	0.5	testis-specific serine kinase 3	81629	protein_coding
ENSG00000225828	FAM229A			0					0				0		0	0	0	0	0	0	0	0	0	0	0	0	0	0	0	0	0	0	0	0	0	0	0	0	0	0	0	0	family with sequence similarity 229, member A	100128071	protein_coding
ENSG00000160058	BSDC1			0					0				0		0	0.452209	0.6	0.5	0.3	0	0	0	0	0	0	0	0	0	0	0	0	0	0	0	0	0	0.2	0	0	0	0	0	BSD domain containing 1	55108	protein_coding
ENSG00000254553	RP1-27O5.3			0					0				0		0	0	0	0	0	0	0	0	0	0	0	0	0	0	0	0	0	0	0	0	0	0	0	0	0	0	0	0		NA	protein_coding
ENSG00000273274	ZBTB8B			0					0				0		0	0	0	0	0	0	0	0	0	0	0	0	0	0	0	0	0	0	0	0	0	0	0	0	0	0	0	0	zinc finger and BTB domain containing 8B	728116	protein_coding
ENSG00000160062	ZBTB8A			0					0				0		0	30.8531	40.9	31.6	20.1	0	0	0	0.6	0	0	0.7	0	0.1	2.2	0.3	0.9	0.4	0.3	0	0	0	0.5	0.3	0.5	2.4	0.3	0.5	zinc finger and BTB domain containing 8A	653121	protein_coding
ENSG00000176261	ZBTB8OS			0					0				0		0	111.6	120.2	90.7	123.9	1.4	0	0	0	1.8	0.2	5	6.1	0.7	0	0.7	0.3	0.4	0.4	0.3	0.2	0.1	2.3	0	0.5	14.6	5.4	2.2	zinc finger and BTB domain containing 8 opposite strand	339487	protein_coding
ENSG00000162521	RBBP4			0					0			101.8	6		0	53.9315	56.9	49.1	55.7	0.1	2.6	0.3	0.3	0.4	0.2	1.2	4.8	1.6	1.2	4.4	0.2	0.1	0.4	0.1	0.4	0	151.6	79.4	23.2	214.9	90.5	51.4	retinoblastoma binding protein 4	5928	protein_coding
ENSG00000162520	SYNC			0					0				0		0	7.46097	7.9	10.9	3.5	0	0	0	0	0	0	0.4	0	0	0.2	0	0	0	0.2	0	0	0	0	0.3	0.2	0	0.3	0	syncoilin, intermediate filament protein	81493	protein_coding
ENSG00000162522	KIAA1522			0					0			1.2	1		0	0	0	0	0	0	0	0	0	0	0	0	0	0	0	0	0	0	0	0	0	0	0	0.5	0.2	0.3	0.6	1.2	KIAA1522	57648	protein_coding
ENSG00000134684	YARS			0					0			33.3	1		0	106.224	74.4	120.6	123.7	0.2	0.3	0	1.5	0.1	0	0	3	0.9	1.9	0.5	0	0.1	0.4	0.1	0.1	0	12.1	1	17.2	1.5	33.3	11.3	tyrosyl-tRNA synthetase	8565	protein_coding
ENSG00000116497	S100PBP			0					0			594.7	2		0	165.433	175.9	170.9	149.5	0	0	0	0.6	0.8	0.4	1.5	1.3	1.1	6.8	0.1	0.6	0	0.3	0.2	0	0.3	28.9	4.1	24.6	28.7	972	217.3	S100P binding protein	64766	protein_coding
ENSG00000160097	FNDC5			0					0			1.8	1		0	2.37533	0.8	3.3	3	0	0	0	0.2	0	0	0	0	0	0	0	0	0	0	0	0	0	0.2	0.3	0	1.8	0	0	fibronectin type III domain containing 5	252995	protein_coding
ENSG00000121905	HPCA			0					0				0		0	0.59895	0.6	1.2	0	0	0	0	0	0	0	0	0	0	0	0	0	0	0	0	0	0	0.2	0	0	0.3	0	0	hippocalcin	3208	protein_coding
ENSG00000121900	TMEM54			0					0				0		0	0	0	0	0	0	0	0	0	0	0	0	0	0	0	0	0	0	0	0	0	0	0.2	0	0	0.3	0	0	transmembrane protein 54	113452	protein_coding
ENSG00000116514	RNF19B			0					0			5.5	1		0	11.423	7.9	13.3	13	0.3	0	0.2	0	0.1	0.2	0.3	0	0.1	0	0	0	0	0	0.2	0	0	1.8	0	5.5	0.6	0	1.7	ring finger protein 19B	127544	protein_coding
ENSG00000267885	FKSG48			0					0				0		0	0	0	0	0	0	0	0	0	0	0	0	0	0	0	0	0	0	0	0	0	0	0	0	0	0	0	0		NA	protein_coding
ENSG00000004455	AK2			0					0			373.1	4		0	66.3696	54.9	62.7	81.5	0.7	1.2	0	0.9	0.6	0.1	1	0.7	0.8	2.6	0.5	0	1	0.8	0.4	0.2	0.1	740.5	3.6	103.1	10.5	48.4	600.4	adenylate kinase 2	204	protein_coding
ENSG00000142920	ADC			0					0			1.2	1		0	0	0	0	0	0	0	0	0	0	0	0	0	0	0	0	0	0	0	0	0	0	0.2	0	0	0.3	0	1.2	arginine decarboxylase	113451	protein_coding
ENSG00000116525	TRIM62			0					0				0		0	0	0	0	0	0	0	0	0	0	0	0	0	0	0	0	0	0	0	0	0	0	0.2	0	0.4	0	0	0	tripartite motif containing 62	55223	protein_coding
ENSG00000160094	ZNF362			0					0				0		0	0	0	0	0	0	0	0	0	0	0	0	0	0	0	0	0	0	0	0	0	0	0	0.3	0	0	0	0.2	zinc finger protein 362	149076	protein_coding
ENSG00000184389	A3GALT2			0					0				0		0	0	0	0	0	0	0	0	0	0	0	0	0	0	0	0	0	0	0	0	0	0	0.2	0.3	0	0.3	0	0.5	alpha 1,3-galactosyltransferase 2	127550	protein_coding
ENSG00000134686	PHC2			0					0				0		0	0	0	0	0	0	0	0	0	0	0	0	0	0	0.2	0	0	0	0	0	0	0	0	0	0	0.3	0.6	0	polyhomeotic homolog 2 (Drosophila)	1912	protein_coding
ENSG00000121903	ZSCAN20			0					0			1.5	1		0	4.79593	5.5	2.4	6.5	0	0	0	0	0	0	0	0	0	0	0	0	0	0	0	0	0	0.2	1.5	0	0	0.3	0.2	zinc finger and SCAN domain containing 20	7579	protein_coding
ENSG00000121904	CSMD2			0					0			1.8	2		0	0.847772	0.6	1.7	0.3	0	0	0	0	0	0	0	0	0	0	0	0	0	0	0	0	0	0.3	0	0.2	0.6	2.1	1.4	CUB and Sushi multiple domains 2	114784	protein_coding
ENSG00000176256	HMGB4			0					0			361.8	1		0	270.351	214.2	235.7	361.2	1.5	1.2	0.2	1.3	1	0.6	2	17.5	9.7	11.8	4	2.2	4.6	4.8	0.1	1.5	0.2	8.8	2.3	361.8	22.4	2.7	6.5	high mobility group box 4	127540	protein_coding
ENSG00000142698	C1orf94			0					0			68	2		0	9.43363	6.3	9.5	12.5	0	0	0	0.3	0	0	0	0.7	0	0.2	0.5	0	0	0	0	0	0	2.3	0.5	133.5	2.4	0.3	0.5	chromosome 1 open reading frame 94	84970	protein_coding
ENSG00000163866	SMIM12			0					0				0		0	4.09495	1.8	4.7	5.7	0	0	0	0	0.1	0	0	0	0	0.2	0	0	0	0	0	0	0	0	0	0.5	0	0.9	0	small integral membrane protein 12	113444	protein_coding
ENSG00000189280	GJB5			0					0				0		0	1.4354	1.4	2.6	0.3	0	0	0	0	0	0	0	0	0	0	0	0	0.1	0	0	0	0	0	0	0	0	0	0	gap junction protein, beta 5, 31.1kDa	2709	protein_coding
ENSG00000189433	GJB4			0					0				0		0	0	0	0	0	0	0	0	0	0	0	0	0	0	0	0	0	0	0	0	0	0	0	0.3	0	0	0	0	gap junction protein, beta 4, 30.3kDa	127534	protein_coding
ENSG00000188910	GJB3			0					0				0		0	0	0	0	0	0	0	0	0	0	0	0	0	0	0	0	0	0	0	0	0	0	0.2	0.5	0	0.3	0	0	gap junction protein, beta 3, 31kDa	2707	protein_coding
ENSG00000187513	GJA4			0					0				0		0	0	0	0	0	0	0	0	0	0	0	0	0	0	0	0	0	0	0	0	0	0	0	0	0	0	0	0	gap junction protein, alpha 4, 37kDa	2701	protein_coding
ENSG00000116544	DLGAP3			0					0				0		0	0	0	0	0	0	0	0	0	0	0	0	0	0	0	0	0	0	0	0	0	0	0	0.5	0.5	0.9	0.3	0.5	discs, large (Drosophila) homolog-associated protein 3	58512	protein_coding
ENSG00000271741	RP11-244H3.4			0					0				0		0	0	0	0	0	0	0	0	0	0	0	0	0	0	0	0	0	0	0	0	0	0	0	0	0	0	0	0		9204	protein_coding
ENSG00000243749	ZMYM6NB			0					0			380.6	4		0	93.3467	71.6	91.8	116.6	0.5	3.1	0.3	1.2	0.5	0.3	2.7	5.8	0.5	2.4	0.8	0.5	0.7	0.4	0.4	0.3	0.3	58.8	0.5	19.8	453.9	565.5	444.2	ZMYM6 neighbor	100506144	protein_coding
ENSG00000163867	ZMYM6			0					0			14.3	2		0	31.63	36	26.8	32.1	0	0.6	0.2	0.1	0.4	0.5	0.7	0	0.4	0	0.9	0.1	0	0	0	0.1	0.1	1.7	0	2.3	5.1	9.1	19.5	zinc finger, MYM-type 6	9204	protein_coding
ENSG00000197056	ZMYM1			0					0			35.2	2		0	27.0749	31.7	18.5	31	2.8	0	0	0	0.1	0	0.4	0	0.3	0.7	1.4	0	0	0	0	0.4	0	1.3	53.3	17.2	1.2	0.6	0.5	zinc finger, MYM-type 1	79830	protein_coding
ENSG00000116560	SFPQ			0					0				0		0	215.259	216.8	212.9	216.1	5.8	4.8	1.2	0.7	2	0.6	2.9	14.3	2.2	4.8	2.4	1.8	0.3	3.2	0	0.8	0.2	36.9	4.8	5.8	21.2	15.4	14.4	splicing factor proline/glutamine-rich	6421	protein_coding
ENSG00000146463	ZMYM4			0					0				0		0	148.621	168.2	154.3	123.4	0.5	0.1	0.2	1.6	0.1	0.6	3.3	0.8	1.3	2.9	2.4	0	1.2	0.1	0.5	1.3	0.2	2.6	11.4	3.5	27.5	1.2	3.1	zinc finger, MYM-type 4	9202	protein_coding
ENSG00000142687	KIAA0319L			0					0				0		0	3.38094	4.1	3.1	3	0	0	0	0	0.1	0	0	0	0	0	0	0.2	0	0	0	0	0	0.3	0	0.2	0.3	0	0	KIAA0319-like	79932	protein_coding
ENSG00000020129	NCDN			0					0				0		0	0.463693	0.6	0.2	0.5	0	0	0	0	0	0	0	0	0	0	0	0	0	0	0	0	0	0	0	0.2	0	0.3	0.2	neurochondrin	23154	protein_coding
ENSG00000116819	TFAP2E			0					0				0		0	0.407215	0.2	0.5	0.5	0	0	0	0	0	0	0	0	0	0	0	0	0	0	0	0	0	0	0.3	0.2	0	0	0	transcription factor AP-2 epsilon (activating enhancer binding protein 2 epsilon)	339488	protein_coding
ENSG00000126067	PSMB2			0					0				0		0	108.862	78.1	100.6	147.9	0.2	0	0	0.9	0.9	0.6	0.3	0.7	0.3	1.7	1.5	1.2	1.3	2.1	0.4	2.2	0.1	1	0.8	3	13.4	2.7	0.5	proteasome (prosome, macropain) subunit, beta type, 2	5690	protein_coding
ENSG00000142686	C1orf216			0					0			84.6	3		0	0.509296	0.2	0.2	1.1	0	0	0	0	0	0	0	0	0	0	0	0	0	0	0	0	0	9.4	0.3	0	147.6	0.3	96.9	chromosome 1 open reading frame 216	127703	protein_coding
ENSG00000134698	AGO4			0					0				0		0	18.507	8.9	19.9	26.6	0	0	0	0	0	0.1	0	0	0.4	0	0	0	0	0	0	0	0	0.2	0	0.2	0.3	0	0.7	argonaute RISC catalytic component 4	192670	protein_coding
ENSG00000092847	AGO1			0					0				0		0	0	0	0	0	0	0	0	0	0	0	0	0	0	0	0	0	0	0	0	0	0	0	0	0	0	0	0.2	argonaute RISC catalytic component 1	26523	protein_coding
ENSG00000126070	AGO3			0					0			263.7	4		0	159.267	152.1	155	170.7	4.3	1.7	0.6	0.5	0.5	0.2	1.4	0	1.1	13	1	0.3	0.7	1.5	0.9	0.4	0.6	26.8	88.3	2.5	253.1	108.7	604.8	argonaute RISC catalytic component 3	192669	protein_coding
ENSG00000092850	TEKT2			0					0			1.2	1		0	0.791795	0.8	0.5	1.1	0	0	0	0.1	0	0	0	0	0	0	0	0	0	0	0	0	0	0	0	0	1.2	0	0	tektin 2 (testicular)	27285	protein_coding
ENSG00000116863	ADPRHL2			0					0			228.1	2		0	1.37943	1.6	1.4	1.1	0	0	0	0	0	0	0.1	0	0	0	0	0	0	0	0	0	0	453.6	0.3	0.4	2.7	0.3	0	ADP-ribosylhydrolase like 2	54936	protein_coding
ENSG00000171812	COL8A2			0					0				0		0	0	0	0	0	0	0	0	0	0	0	0	0	0	0	0	0	0	0	0	0	0	0.2	0.3	0.2	0.3	0.9	0.5	collagen, type VIII, alpha 2	1296	protein_coding
ENSG00000054116	TRAPPC3			0					0			23.1	4		0	21.7977	15.1	20.2	30.2	0	0	0	0.2	0	0.3	0.2	2.3	0	0	0	0	0.1	0	0.2	0	0	1.8	52.7	21.8	3	6.1	11.8	trafficking protein particle complex 3	27095	protein_coding
ENSG00000116871	MAP7D1			0					0				0		0	2.63502	1.6	3.6	2.7	0	0	0	0	0	0	0	0	0	0	0.4	0	0	0	0	0	0	0.3	0.3	0	0	0	0	MAP7 domain containing 1	55700	protein_coding
ENSG00000054118	THRAP3			0					0				0		0	63.4009	54.1	66	70.1	0.6	0	0	2.2	3.3	0	0.5	2.5	0.2	15.7	0.5	0.6	0.1	0	0.4	0.4	0.1	1.7	2.5	0.7	1.5	2.1	2.2	thyroid hormone receptor associated protein 3	9967	protein_coding
ENSG00000214193	SH3D21			0					0				0		0	0	0	0	0	0	0	0	0	0	0	0	0	0	0	0	0	0	0	0	0	0	0.3	0	0.2	0	0	0.2	SH3 domain containing 21	79729	protein_coding
ENSG00000142694	EVA1B			0					0				0		0	0	0	0	0	0	0	0	0	0	0	0	0	0	0	0	0	0	0	0	0	0	0.2	0	0	0	0	0	eva-1 homolog B (C. elegans)	55194	protein_coding
ENSG00000116883	RP11-268J15.5			0					0				0		0	0	0	0	0	0	0	0	0	0	0	0	0	0	0	0	0	0	0	0	0	0	0	0	0	0	0	0		NA	protein_coding
ENSG00000196182	STK40			0					0				0		0	0	0	0	0	0	0	0	0	0	0	0	0	0	0	0	0	0	0	0	0	0	0	0.3	0	0	0.6	0	serine/threonine kinase 40	83931	protein_coding
ENSG00000181817	LSM10			0					0				0		0	0	0	0	0	0	0	0	0	0	0	0	0	0	0	0	0	0	0	0	0	0	0	0	0	0	0	0	LSM10, U7 small nuclear RNA associated	84967	protein_coding
ENSG00000116885	OSCP1			0					0				0		0	94.3754	65.7	101.1	116.3	0	0.6	0	0.1	0.1	0.3	0	1	0	2.6	0.4	0	0.9	0.5	0.9	0.4	0.2	0.3	2.3	0.7	3.3	10.3	5.5	organic solute carrier partner 1	127700	protein_coding
ENSG00000116898	MRPS15			0					0				0		0	90.1964	67.1	83.1	120.4	0.3	1.5	0	2.4	0.2	0.3	0.3	5.4	2.1	6.3	3	2.3	0.7	1.7	0	0.2	0.1	2.5	3	1.4	4.2	3.6	2.6	mitochondrial ribosomal protein S15	64960	protein_coding
ENSG00000119535	CSF3R			0					0			1.6	2		0	0.226188	0.4	0	0.3	0	0	0	0	0	0	0	0	0	0	0	0	0	0	0	0	0	1.5	0.3	0.5	0.3	0	1.7	colony stimulating factor 3 receptor (granulocyte)	1441	protein_coding
ENSG00000163873	GRIK3			0					0				0		0	0	0	0	0	0	0	0	0	0	0	0	0	0	0	0	0	0	0	0	0	0	1	0.3	0.4	0	0	0.2	glutamate receptor, ionotropic, kainate 3	2899	protein_coding
ENSG00000163874	ZC3H12A			0					0				0		0	0	0	0	0	0	0	0	0	0	0	0	0	0	0	0	0	0	0	0	0	0	0	0.3	0	0.6	0.3	0	zinc finger CCCH-type containing 12A	80149	protein_coding
ENSG00000163875	MEAF6			0					0			40.4	1		0	90.9945	69.4	89.5	114.2	0.7	1.3	0.3	0.3	0.2	0.2	0.4	2.5	0.4	1.5	2.6	0.3	0.1	0.3	0	1	0	11.1	0.5	40.4	1.5	0.9	0	MYST/Esa1-associated factor 6	64769	protein_coding
ENSG00000163877	SNIP1			0					0			1.2	1		0	0.712683	0.8	0.2	1.1	0	0	0	0	0	0	0	0	0	0	0	0	0	0	0	0	0	0.2	0	0	0.3	0	1.2	Smad nuclear interacting protein 1	79753	protein_coding
ENSG00000163879	DNALI1			0					0			74.5	3		0	16.0461	11.2	22.5	14.4	0	0.3	0	0	0	0	0.1	0	0	0.2	0.1	0	0	0	0	0.1	0	73.1	0.3	145.6	4.8	0	1.4	dynein, axonemal, light intermediate chain 1	7802	protein_coding
ENSG00000134697	GNL2			0					0				0		0	248.21	185.3	269.6	289.7	0	1.3	0.2	2.5	0.6	0.4	1	3	1.5	3.6	0.4	1.2	0.1	2.2	0.1	0.1	0.4	2.3	0.5	2.3	6.3	0.9	2.4	guanine nucleotide binding protein-like 2 (nucleolar)	29889	protein_coding
ENSG00000169218	RSPO1			0					0				0		0	0.0905969	0	0	0.3	0	0	0	0	0	0	0	0	0	0	0	0	0	0	0	0	0	0	0.3	0	0	0	0	R-spondin 1	284654	protein_coding
ENSG00000116922	C1orf109			0					0				0		0	3.30216	4.5	1.9	3.5	0	0	0	0	0	0	0	0.3	0	0.2	0	0	0	0	0	0	0	0	0	0	0.3	0	0	chromosome 1 open reading frame 109	54955	protein_coding
ENSG00000134690	CDCA8			0					0				0		0	1.89866	3.1	2.4	0.3	0	0	0	0	0	0	0.1	0	0	0	0	0	0	0	0	0	0	0	0	0	0.9	0.6	0.7	cell division cycle associated 8	55143	protein_coding
ENSG00000183317	EPHA10			0					0				0		0	0	0	0	0	0	0	0	0	0	0	0	0	0	0	0	0	0	0	0	0	0	0.2	0	0.4	0.6	0.3	0.5	EPH receptor A10	284656	protein_coding
ENSG00000185090	MANEAL			0					0			30.2	2		0	0.916678	0.6	0.2	1.9	0	0	0	0	0	0	0	0	0	0.2	0	0	0	0	0	0	0	4.3	56	0	0.3	0	0.2	mannosidase, endo-alpha-like	149175	protein_coding
ENSG00000196449	YRDC			0					0			50.6	3		0	4.88414	5.7	5.7	3.3	0	0	0	0	0.1	0	0	0.2	0	0	0	0	0	0	0	0	0	10.6	0.3	0	0.3	2.1	139.2	yrdC N(6)-threonylcarbamoyltransferase domain containing	79693	protein_coding
ENSG00000197982	C1orf122			0					0			6.5	3		0	0.407047	0	0.9	0.3	0	0	0	0	0	0	0	0	0.1	0	0.1	0	0	0	0	0	0	9.6	0	5.1	0	4.8	0	chromosome 1 open reading frame 122	127687	protein_coding
ENSG00000188786	MTF1			0					0			4.8	5		0	3.42499	4.9	4	1.4	0	0	0	0	0.2	0	0	0	0	0.2	0	0	0	0	0.1	0	0	10.7	1.3	4.6	0.3	4.2	3.1	metal-regulatory transcription factor 1	4520	protein_coding
ENSG00000230610	AL929472.1			0					0				0		0	0	0	0	0	0	0	0	0	0	0	0	0	0	0	0	0	0	0	0	0	0	0	0	0	0	0	0		NA	protein_coding
ENSG00000204084	INPP5B			0					0				0		0	34.9459	32.3	34.2	38.3	0	0.4	0	0.3	0	0.3	0.3	0	0.4	1.4	0	0	0.1	0	0	0	0	0.3	0.3	0.2	0.9	0.3	0	inositol polyphosphate-5-phosphatase, 75kDa	3633	protein_coding
ENSG00000183431	SF3A3			0					0				0		0	419.841	387.5	455.7	416.4	0.8	8.3	1.2	2.6	1.1	0.3	0	8.1	3.8	2.6	3.6	1.2	0.6	2.9	0.7	1	0.4	1.3	0	3.2	7.2	1.5	1.9	splicing factor 3a, subunit 3, 60kDa	10946	protein_coding
ENSG00000183386	FHL3			0					0				0		0	0	0	0	0	0	0	0	0	0	0	0	0	0	0	0	0	0	0	0	0	0	0.2	0	0	0	0	0	four and a half LIM domains 3	2275	protein_coding
ENSG00000183520	UTP11L			0					0				0		0	556.817	573.3	579.3	517.8	0.2	7.6	0	2.5	1.7	1.5	1.3	14.2	2.5	5.1	3.3	4.2	0.4	1.1	0.3	2.1	0.5	5	0.5	3.5	6.6	1.5	4.6	UTP11-like, U3 small nucleolar ribonucleoprotein, (yeast)	51118	protein_coding
ENSG00000185668	POU3F1			0					0				0		0	0	0	0	0	0	0	0	0	0	0	0	0	0	0	0	0	0	0	0	0	0	0.5	0	0.4	0	0	0.5	POU class 3 homeobox 1	5453	protein_coding
ENSG00000116954	RRAGC			0					0			74.5	1		0	171.871	186.5	166.8	162.3	0	0	0.5	0.5	1.4	1	0.8	12	4.3	3.2	5.6	0.2	0.7	0.3	0.3	0.7	0.2	3.5	1	1.4	6.9	3.6	74.5	Ras-related GTP binding C	64121	protein_coding
ENSG00000131233	GJA9			0					0			4.8	1		0	5.66407	9.2	4	3.8	0	0	0	0	0	0	0	0	0	0.5	0	0	0	0.1	0	0	0.1	0.3	0.3	0	4.8	0	0	gap junction protein, alpha 9, 59kDa	81025	protein_coding
ENSG00000158315	RHBDL2			0					0				0		0	15.8817	16.1	9	22.6	0	0	0	1.9	0.1	0	0	3.8	1.3	0	0.5	0	0	0	0	0	0	0.2	0	0.4	0.9	0	0.2	rhomboid, veinlet-like 2 (Drosophila)	54933	protein_coding
ENSG00000174574	AKIRIN1			0					0			2509.1	2		0	16.9132	16.7	23.7	10.3	0.1	0	0.2	0.5	0	0	0.1	0	1.6	0	0	0	0	0	0	0	0	3089.7	1928.4	1.6	1.8	0	3.6	akirin 1	79647	protein_coding
ENSG00000168653	NDUFS5			0					0				0		0	83.1608	48.8	74.3	126.4	1.2	1	1.7	1.2	0	0.6	0.3	8.2	1.2	2	2.7	2.2	2.3	1	0.1	0.6	0.2	15.5	3.6	6.2	12.6	1.8	3.1	NADH dehydrogenase (ubiquinone) Fe-S protein 5, 15kDa (NADH-coenzyme Q reductase)	4725	protein_coding
ENSG00000127603	MACF1			0					0				0		0	118.914	123.7	107.5	125.6	0.2	1.9	0	0.7	1.1	0.3	0.1	1.6	1.5	0.2	0.4	0.2	2	0.2	1.9	0.3	0.1	15.7	6.3	3.7	7.5	1.8	3.6	microtubule-actin crosslinking factor 1	23499	protein_coding
ENSG00000255103	KIAA0754			0					0				0		0	0	0	0	0	0	0	0	0	0	0	0	0	0	0	0	0	0	0	0	0	0	0.3	0	0.2	0.9	0.3	0.2	KIAA0754	643314	protein_coding
ENSG00000183682	BMP8A			0					0			30.9	6		0	1.04062	0.8	0.9	1.4	0	0	0	0	0	0	0	0	0	0	0	0	0	0	0	0	0	6.3	20	3	4.8	53.9	97.3	bone morphogenetic protein 8a	353500	protein_coding
ENSG00000090621	PABPC4			0					0				0		0	34.8141	22.6	38.9	42.9	0.2	0.5	0	0	0	0.2	1.2	0.7	0.2	0.5	1.9	0	0	0.1	0.1	0.1	0	0.3	0.8	0.7	5.1	0.9	1.7	poly(A) binding protein, cytoplasmic 4 (inducible form)	8761	protein_coding
ENSG00000163909	HEYL			0					0				0		0	0.0905969	0	0	0.3	0	0	0	0	0	0	0	0	0	0	0	0	0	0	0	0	0	0	0	0	0.3	0	0.7	hes-related family bHLH transcription factor with YRPW motif-like	26508	protein_coding
ENSG00000116981	NT5C1A			0					0				0		0	0	0	0	0	0	0	0	0	0.1	0	0	0	0	0	0	0	0	0	0	0	0	0.2	0	0.2	0	0	0	5'-nucleotidase, cytosolic IA	84618	protein_coding
ENSG00000116983	HPCAL4			0					0				0		0	0	0	0	0	0	0	0	0	0	0	0	0	0	0	0	0	0	0	0	0	0	0	0	0	0	0	0	hippocalcin like 4	51440	protein_coding
ENSG00000084072	PPIE			0					0			7456.4	6		0	103.731	98.4	95.9	116.9	0.1	1.2	0	0.4	0.4	0.3	0.5	4.1	0.3	0.5	0.8	0	0.1	0	0	0.6	0	3172.5	2416.3	4319.2	1067.7	5339.7	28422.9	peptidylprolyl isomerase E (cyclophilin E)	10450	protein_coding
ENSG00000116985	BMP8B			0					0			328.9	6		0	2.08107	1.4	2.4	2.4	0	0	0	0	0	0	0	0	0	0	0	0	0	0	0	0	0	101.8	136.9	75.8	58.3	249.7	1351.1	bone morphogenetic protein 8b	656	protein_coding
ENSG00000198754	OXCT2			0					0				0		0	0	0	0	0	0	0	0	0	0	0	0	0	0	0	0	0	0	0	0	0	0	0.5	0.8	0	0	0.6	0.7	3-oxoacid CoA transferase 2	64064	protein_coding
ENSG00000043514	TRIT1			0					0			45.3	3		0	65.4415	59	74.3	63.1	0.8	5	0	1.2	0.1	0	2.2	1.3	0.5	2.9	0.8	0.1	0	0.1	0	0	0.1	43.8	0.5	68.2	3	0.3	23.8	tRNA isopentenyltransferase 1	54802	protein_coding
ENSG00000116990	MYCL			0					0				0		0	0.0791126	0	0.2	0	0	0	0	0	0	0	0	0	0	0	0	0	0	0	0	0	0	0.2	0	0.2	0	0.6	0.2	v-myc avian myelocytomatosis viral oncogene lung carcinoma derived homolog	4610	protein_coding
ENSG00000168389	MFSD2A			0					0			5.8	1		0	3.56241	2.8	4	3.8	0	0	0	0	0	0	0	0	0	0	0.5	0	0.1	0	0	0	0	0	0	5.8	0.3	0.3	0	major facilitator superfamily domain containing 2A	84879	protein_coding
ENSG00000131236	CAP1			0					0			41.4	1		0	130.631	107	130.5	154.4	0.9	0.4	0.2	0.1	0.6	0.3	1	1	0.8	1.5	3.5	0.8	0.6	1.5	0.1	0.4	0	9.1	20.5	41.4	7.2	0.6	1.2	CAP, adenylate cyclase-associated protein 1 (yeast)	10487	protein_coding
ENSG00000131238	PPT1			0					0				0		0	40.5633	29.7	36.6	55.4	0	3.7	0.2	0.5	0.3	0	0.1	0	0.2	0.5	0.2	0.1	0	0.2	0.1	0.1	0	0.5	0.3	2.3	2.1	0.3	0.5	palmitoyl-protein thioesterase 1	5538	protein_coding
ENSG00000117000	RLF			0					0			306.9	2		0	369.636	402.7	392.6	313.6	0.2	2.5	0	0.9	2.3	0.8	0.2	4.5	1.8	0.7	0.3	0.1	0.1	0.2	0.2	2.2	0.2	360.8	17.8	252.9	4.8	25.7	34.6	rearranged L-myc fusion	6018	protein_coding
ENSG00000188800	TMCO2			0					0				0		0	351.213	458.4	327.8	267.4	0.9	2.8	0.6	0.7	1.5	1.6	3	17.1	2	4.9	2.9	2.2	1.7	6.2	0.7	1.3	0.6	6.3	7.1	1.8	11.1	1.5	3.1	transmembrane and coiled-coil domains 2	127391	protein_coding
ENSG00000084073	ZMPSTE24			0					0				0		0	25.1769	27.9	16.1	31.5	0.2	0.1	0	0.1	0	0.2	0.5	0	0	0	0.3	0	0	0	0	0	0	0	0.3	0.2	0.3	0.3	0.5	zinc metallopeptidase STE24	10269	protein_coding
ENSG00000049089	COL9A2			0					0			1.6	2		0	0	0	0	0	0	0	0	0	0	0	0	0	0	0	0	0	0	0	0	0	0	1.3	0.3	0.4	1.8	0.6	0	collagen, type IX, alpha 2	1298	protein_coding
ENSG00000084070	SMAP2			0					0			3.1	1		0	7.01408	4.5	5.7	10.9	0	0	0	0.1	0	0	0	0	0	0	0	0	0	0	0	0	0	0.5	0.5	0.4	0.3	0	3.1	small ArfGAP2	64744	protein_coding
ENSG00000187801	ZFP69B			0					0			1.5	1		0	0.361612	0.6	0.5	0	0	0	0	0	0	0	0	0	0	0	0	0	0	0	0	0	0	0.2	0.3	0.4	1.5	0.6	0.2	ZFP69 zinc finger protein B	65243	protein_coding
ENSG00000187815	ZFP69			0					0				0		0	65.8724	63.3	68.6	65.8	0.3	0	0.6	0	0.1	0.1	0	1.2	2.3	0	1.2	0	0.4	0.8	0	0	0	0.7	16	0.2	2.4	0.6	0	ZFP69 zinc finger protein	339559	protein_coding
ENSG00000164002	EXO5			0					0			417.5	2		0	60.3565	48	70	63.1	0	0.5	0	0.3	0.1	0	0	0.8	0.5	0.2	1.1	0.1	0.3	1.1	0	0	0	10.9	0.3	1.6	1.5	810.7	24.3	exonuclease 5	64789	protein_coding
ENSG00000117010	ZNF684			0					0				0		0	19.8181	28.5	18.7	12.2	0.5	1.4	0	0	0	0	0	0	0.5	0.2	0.6	0	0	0.6	0	0	0	0.3	0.3	0	0.6	0	3.4	zinc finger protein 684	127396	protein_coding
ENSG00000117016	RIMS3			0					0				0		0	0	0	0	0	0	0	0	0	0	0	0	0	0	0	0	0	0	0	0	0	0	0	0	0.2	0	0.3	0.2	regulating synaptic membrane exocytosis 3	9783	protein_coding
ENSG00000066136	NFYC			0					0				0		0	2.51142	1.8	1.9	3.8	0	0	0	0	0	0	0	0	0	0	0	0	0	0	0	0	0	0.2	0	0	0	0	0.2	nuclear transcription factor Y, gamma	4802	protein_coding
ENSG00000117013	KCNQ4			0					0			1.4	2		0	0.0905969	0	0	0.3	0	0	0	0	0	0	0	0	0	0	0	0	0	0	0	0	0	0.5	1.3	0.2	1.5	0.3	1	potassium voltage-gated channel, KQT-like subfamily, member 4	9132	protein_coding
ENSG00000179862	CITED4			0					0				0		0	0	0	0	0	0	0	0	0	0	0	0	0	0	0	0	0	0	0	0	0	0	0.2	0.3	0	0.3	0	0.2	Cbp/p300-interacting transactivator, with Glu/Asp-rich carboxy-terminal domain, 4	163732	protein_coding
ENSG00000171793	CTPS1			0					0				0		0	64.9	55.3	75.2	64.1	0	1.7	0	0.3	0.1	0.1	0.4	1	2	1.4	0.1	0.2	0.3	0.1	0	0	0	0.5	0	0.4	2.7	0.9	1.9	CTP synthase 1	1503	protein_coding
ENSG00000171790	SLFNL1			0					0				0		0	0	0	0	0	0	0	0	0	0	0	0	0	0	0	0	0	0	0	0	0	0	0	0	0.7	0	0	0	schlafen-like 1	200172	protein_coding
ENSG00000010803	SCMH1			0					0				0		0	2.65678	3.3	3.1	1.6	0	0.1	0	0	0	0	0	0	0	0	0.1	0	0	0.1	0	0	0	0	0	0	0	0	0	sex comb on midleg homolog 1 (Drosophila)	22955	protein_coding
ENSG00000204060	FOXO6			0					0			1.6	2		0	0	0	0	0	0	0	0	0	0	0	0	0	0	0	0	0	0	0	0	0	0	0.5	0	1.9	1.2	0	0.2	forkhead box O6	100132074	protein_coding
ENSG00000127129	EDN2			0					0				0		0	0	0	0	0	0	0	0	0	0	0	0	0	0	0	0	0	0	0	0	0	0	0	0	0	0	0	0	endothelin 2	1907	protein_coding
ENSG00000127124	HIVEP3			0					0			1.3	2		0	0	0	0	0	0	0	0	0	0	0	0	0	0	0	0	0	0	0	0	0	0	0.3	0	0.4	1.2	0.9	1.4	human immunodeficiency virus type I enhancer binding protein 3	59269	protein_coding
ENSG00000044012	GUCA2B			0					0				0		0	0	0	0	0	0	0	0	0	0	0	0	0	0	0	0	0	0	0	0	0	0	0	0	0	0.3	0	0	guanylate cyclase activator 2B (uroguanylin)	2981	protein_coding
ENSG00000197273	GUCA2A			0					0				0		0	0	0	0	0	0	0	0	0	0	0	0	0	0	0	0	0	0	0	0	0	0	0	0	0	0	0	0.2	guanylate cyclase activator 2A (guanylin)	2980	protein_coding
ENSG00000198815	FOXJ3			0					0				0		0	31.6482	38	31.1	25.8	0.1	0.1	0.2	0	0	0.3	0.1	0	0.1	0.3	0.5	0.3	0	0	0.1	0.1	0	1.3	0	0.5	0.9	1.8	3.6	forkhead box J3	22887	protein_coding
ENSG00000177181	RIMKLA			0					0				0		0	1.51624	0.4	1.4	2.7	0	0	0	0	0	0	0.7	0	0	0	0	0	0	0	0	0	0	0	0	0	0	0	0	ribosomal modification protein rimK-like family member A	284716	protein_coding
ENSG00000066185	ZMYND12			0					0				0		0	266.924	283.1	253.5	264.2	0	1.5	0.3	2.2	1.4	1.1	1.4	6.4	0	3.1	0.8	0.7	0.1	0.5	0.2	1.3	0	23.8	42.6	5.7	1.2	0.3	1.9	zinc finger, MYND-type containing 12	84217	protein_coding
ENSG00000127125	PPCS			0					0				0		0	391.331	326	365.3	482.7	2.7	1.3	1.2	0.9	3.8	1.3	8.1	4.5	4.1	2.7	11.5	0.8	1.4	1.9	0.7	1.5	0.4	7.9	0.8	4.2	13.7	2.4	8.9	phosphopantothenoylcysteine synthetase	79717	protein_coding
ENSG00000186409	CCDC30			0					0				0		0	111.728	152.3	118.4	64.4	1.8	2.5	0.5	0	1.1	0.1	1.5	0	2	0.7	0.8	0	0.1	0	0	0.2	0.1	1	0	1.1	1.5	0.6	1.9	coiled-coil domain containing 30	728621	protein_coding
ENSG00000171960	PPIH			0					0			14.8	2		0	29.7884	24.8	32.8	31.8	0	0.5	0	0.8	0.4	0.2	0.1	0	0	1.5	0.1	0.2	0.1	0.3	0.1	0	0	22.1	4.6	0.2	7.5	3	2.4	peptidylprolyl isomerase H (cyclophilin H)	10465	protein_coding
ENSG00000065978	YBX1			0					0			74.4	4		0	45.7727	32.1	50.6	54.6	0.1	1.5	0	0.1	0.6	0.2	0.8	0.3	0.3	1	0.5	0.5	0.1	0.3	0	0.5	0	5.8	3.6	40	111.8	38.7	107	Y box binding protein 1	4904	protein_coding
ENSG00000164007	CLDN19			0					0				0		0	0	0	0	0	0	0	0	0	0	0	0	0	0	0	0	0	0	0	0	0	0	0	0	0.2	0	0	0.2	claudin 19	149461	protein_coding
ENSG00000117385	LEPRE1			0					0			2.2	2		0	0	0	0	0	0	0	0	0	0	0	0	0	0	0	0	0	0	0	0	0	0	0.5	0	0.4	0.6	1.5	2.9	leucine proline-enriched proteoglycan (leprecan) 1	64175	protein_coding
ENSG00000164008	C1orf50			0					0				0		0	23.9424	25.6	18.7	27.5	0	0	0.2	0	0	0	0	1.3	0	0.2	0.3	0	0	0.1	0	0.4	0	0.7	1	0	0.6	0.3	0.5	chromosome 1 open reading frame 50	79078	protein_coding
ENSG00000177868	CCDC23			0					0				0		0	4.2074	2	5.7	4.9	0	0.3	0	0	0	0	0	0	0	0.2	0	0	0	0.2	0	0	0	0	0	0	0	0	0	coiled-coil domain containing 23	374969	protein_coding
ENSG00000164010	ERMAP			0					0			63.4	4		0	6.39022	3.1	8.8	7.3	0	1.2	0	0.1	0	0	0.3	0.2	0	0	0	0.1	0.3	0	0	0	0.1	71.1	0.5	0	6.9	24.8	150.9	erythroblast membrane-associated protein (Scianna blood group)	114625	protein_coding
ENSG00000164011	ZNF691			0					0				0		0	3.68547	5.1	3.8	2.2	0	0	0	0	0	0	0	0	0	0	0	0	0	0	0	0	0	0	0	0	0	0	0.5	zinc finger protein 691	51058	protein_coding
ENSG00000117394	SLC2A1			0					0			673.7	4		0	1.57271	0.8	1.2	2.7	0	0	0	0.5	0	0	0	0	0	0	0	0	0	0	0	0	0	47.4	0.3	0.4	66.6	230.1	2350.8	solute carrier family 2 (facilitated glucose transporter), member 1	6513	protein_coding
ENSG00000117395	EBNA1BP2			0					0				0		0	135.658	99.5	124.6	182.9	2.3	2.1	0.2	0.7	1.2	0.3	0.8	3.3	0.4	1.9	1.9	1.2	0.4	1.1	0.1	0.6	0	2.3	3	2.7	7.2	0.3	7.7	EBNA1 binding protein 2	10969	protein_coding
ENSG00000243710	WDR65			0					0			21.8	1		0	34.1033	24	33.5	44.8	0	0	0	0.2	0	0	0.1	0.7	0.5	0	0.1	0	0	0	0	0	0	1.2	1.5	1.8	21.8	3.6	2.6	WD repeat domain 65	149465	protein_coding
ENSG00000179178	TMEM125			0					0				0		0	0	0	0	0	0	0	0	0	0	0	0	0	0	0	0	0	0	0	0	0	0	0	0	0	0.3	0	0	transmembrane protein 125	128218	protein_coding
ENSG00000253313	C1orf210			0					0				0		0	0	0	0	0	0	0	0	0	0	0	0	0	0	0	0	0	0	0	0	0	0	0.3	0	0	0	0	0.2	chromosome 1 open reading frame 210	149466	protein_coding
ENSG00000066056	TIE1			0					0			6.5	2		0	1.86697	0.2	2.1	3.3	0	0	0	0	0	0	0	0	0	0	0	0	0	0	0	0	0	0.7	0	1.1	12	0.6	1	tyrosine kinase with immunoglobulin-like and EGF-like domains 1	7075	protein_coding
ENSG00000117400	MPL			0					0				0		0	0	0	0	0	0	0	0	0	0	0	0	0	0	0	0	0	0	0	0	0	0	0	0	0	0.3	0.3	0	myeloproliferative leukemia virus oncogene	4352	protein_coding
ENSG00000117399	CDC20			0					0			12.3	1		0	1.22059	2.4	0.9	0.3	0	0	0	0	0	0	0	0.2	0	0	0	0	0	0	0	0	0	0.3	0	0	0	0	12.3	cell division cycle 20	991	protein_coding
ENSG00000066322	ELOVL1			0					0			7.5	1		0	23.7681	18.5	33.2	19.6	0	0.3	0	0	0.2	0.3	0.3	1.5	0.8	0	0	0	0	0	0	0.3	0	1	0	0.7	5.4	0.3	7.5	ELOVL fatty acid elongase 1	64834	protein_coding
ENSG00000159479	MED8			0					0				0		0	42.3849	29.1	39.6	58.4	0.9	0	0	0.1	0	0.1	0.2	0.2	0.4	0.2	0.3	0	0.3	0	0	0.2	0.2	1	0	0	0.6	0	0	mediator complex subunit 8	112950	protein_coding
ENSG00000198198	SZT2			0					0			1.5	4		0	5.25884	2	8.3	5.4	0	0	0	0	0	0	0	0	0	0	0	0	0	0	0	0	0	1.7	1.5	1.4	1.2	0.6	1.4	seizure threshold 2 homolog (mouse)	23334	protein_coding
ENSG00000178922	HYI			0					0				0		0	0	0	0	0	0	0	0	0	0	0	0	0	0	0	0	0	0	0	0	0	0	0	0	0	0.3	0	0	hydroxypyruvate isomerase (putative)	81888	protein_coding
ENSG00000142949	PTPRF			0					0				0		0	0	0	0	0	0	0	0	0	0	0	0	0	0	0	0	0	0	0	0	0	0	0.3	0.3	0	0.9	0.6	0.5	protein tyrosine phosphatase, receptor type, F	5792	protein_coding
ENSG00000066135	KDM4A			0					0				0		0	0.520005	0.8	0.5	0.3	0	0	0	0	0	0	0.2	0	0	0	0	0	0	0	0	0	0	0.2	0	0	0.3	0	0.5	lysine (K)-specific demethylase 4A	9682	protein_coding
ENSG00000126091	ST3GAL3			0					0				0		0	0.16971	0	0.2	0.3	0	0	0	0	0	0	0	0	0	0	0	0	0	0	0	0	0	0	0	0.2	0	0	0	ST3 beta-galactoside alpha-2,3-sialyltransferase 3	6487	protein_coding
ENSG00000117407	ARTN			0					0				0		0	0	0	0	0	0	0	0	0	0	0	0	0	0	0	0	0	0	0	0	0	0	0.7	0	0	0.3	0	0	artemin	9048	protein_coding
ENSG00000117408	IPO13			0					0			828.9	5		0	9.72568	10.8	8.1	10.3	0	0	0	0	0	0	0	0.2	0	0	0	0	0	0	0	0	0	81.5	0.8	6	375.3	1500.3	2181.3	importin 13	9670	protein_coding
ENSG00000132768	DPH2			0					0				0		0	0.203387	0.6	0	0	0	0	0	0	0	0	0	0	0	0	0	0	0	0	0	0	0	0.5	0.3	0.4	0.3	0	0	DPH2 homolog (S. cerevisiae)	1802	protein_coding
ENSG00000117410	ATP6V0B			0					0			9.2	2		0	21.6066	13.8	19.5	31.5	0	0	0	0	0	0	0	0	0	0.7	0.1	0	0	0.2	0	0.2	0	1.3	0.3	2.7	8.4	0.6	10.1	ATPase, H+ transporting, lysosomal 21kDa, V0 subunit b	533	protein_coding
ENSG00000117411	B4GALT2			0					0				0		0	0.971879	1	1.9	0	0	0	0	0	0	0	0	0	0	0	0	0	0	0	0	0	0	0.2	0	0	0	0	0	UDP-Gal:betaGlcNAc beta 1,4- galactosyltransferase, polypeptide 2	8704	protein_coding
ENSG00000159214	CCDC24			0					0				0		0	0.158225	0	0.5	0	0	0	0	0	0	0	0	0	0	0	0	0	0	0	0	0	0	0.2	0	0	0	0.6	0	coiled-coil domain containing 24	149473	protein_coding
ENSG00000196517	SLC6A9			0					0				0		0	0	0	0	0	0	0	0	0	0	0	0	0	0	0	0	0	0	0	0	0	0	0	0.5	0	0.3	0	0.2	solute carrier family 6 (neurotransmitter transporter, glycine), member 9	6536	protein_coding
ENSG00000171872	KLF17			0					0				0		0	2.31935	1	2.1	3.8	0	0	0	0	0	0	0	0.2	0	0	0	0	0	0	0	0	0	0.3	0	0	0.9	0.3	0.2	Kruppel-like factor 17	128209	protein_coding
ENSG00000178028	DMAP1			0					0			2.7	3		0	0.950021	0.8	0.9	1.1	0	0	0	0.1	0	0	0	0.5	0	0	0	0	0	0	0	0	0	1.2	0	3	3.9	0.6	0.5	DNA methyltransferase 1 associated protein 1	55929	protein_coding
ENSG00000117419	ERI3			0					0			1.2	1		0	1.19962	0.2	0.9	2.4	0	0	0	0	0	0	0	0	0	0	0	0	0	0	0	0	0	0.2	0	0	1.2	0	0.5	ERI1 exoribonuclease family member 3	79033	protein_coding
ENSG00000187147	RNF220			0					0				0		0	0.69049	0.2	0.2	1.6	0	0	0	0	0	0	0	0	0	0	0	0	0	0	0	0	0	0	0.3	0.4	0.3	0.3	0	ring finger protein 220	55182	protein_coding
ENSG00000126106	TMEM53			0					0				0		0	0.486327	0.2	0.7	0.5	0	0	0	0	0	0	0	0	0	0	0	0	0	0	0	0	0	0	0.3	0.4	0	0	0	transmembrane protein 53	79639	protein_coding
ENSG00000198520	C1orf228			0					0				0		0	2.73838	1.6	1.4	5.2	0	0	0	0.1	0	0	0	0	0	0	0	0	0	0	0	0	0	0	0	0.2	0.3	0	0	chromosome 1 open reading frame 228	339541	protein_coding
ENSG00000142945	KIF2C			0					0				0		0	30.7244	28.7	34.4	29.1	0.1	2.1	0	0	0	0.4	0.3	0	0.5	1.2	0	0.6	0	0.1	0.1	0.2	0	0.8	0.3	2.8	2.4	1.5	2.4	kinesin family member 2C	11004	protein_coding
ENSG00000142959	BEST4			0					0				0		0	0	0	0	0	0	0	0	0	0	0	0	0	0	0	0	0	0	0	0	0	0	0	0	0	0.6	0	0	bestrophin 4	266675	protein_coding
ENSG00000173846	PLK3			0					0				0		0	0	0	0	0	0	0	0	0	0	0	0	0	0	0	0	0	0	0	0	0	0	0.3	0.3	0	0	0	0.7	polo-like kinase 3	1263	protein_coding
ENSG00000188396	TCTEX1D4			0					0				0		0	0	0	0	0	0	0	0	0	0	0	0	0	0	0	0	0	0	0	0	0	0	0	0	0.4	0.3	0	0.2	Tctex1 domain containing 4	343521	protein_coding
ENSG00000222009	BTBD19			0					0				0		0	0	0	0	0	0	0	0	0	0	0	0	0	0	0	0	0	0	0	0	0	0	0	0	0	0	0	0	BTB (POZ) domain containing 19	149478	protein_coding
ENSG00000117425	PTCH2			0					0			1.2	1		0	0	0	0	0	0	0	0	0	0	0	0	0	0	0	0	0	0	0	0	0	0	0.5	0	0.4	1.2	0	0.2	patched 2	8643	protein_coding
ENSG00000070785	EIF2B3			0					0				0		0	318.759	315.9	314	326.4	0	2.2	1.1	0.3	0.4	0.6	0.5	1.2	1.5	0.5	2.3	0.7	0.6	0.2	0.8	0.8	0.1	3.3	1.8	2.7	10.2	2.1	7	eukaryotic translation initiation factor 2B, subunit 3 gamma, 58kDa	8891	protein_coding
ENSG00000126107	HECTD3			0					0			1.9	1		0	0.825914	0.4	0.7	1.4	0	0	0	0	0	0	0	0	0	0	0	0	0	0	0	0	0	0	0	0.4	0.9	0.3	1.9	HECT domain containing E3 ubiquitin protein ligase 3	79654	protein_coding
ENSG00000126088	UROD			0					0			135.1	4		0	36.6606	35.2	40.8	34	0	0.1	0	0.1	0.6	0.5	0	0.8	0	0	0	0.1	0.3	0.3	0.1	0	0	142.5	142.3	108	147.6	2.1	1.7	uroporphyrinogen decarboxylase	7389	protein_coding
ENSG00000162415	ZSWIM5			0					0			1.3	1		0	1.79823	0.4	3.1	1.9	0	0	0	0	0	0	0	0	0	0	0	0	0	0	0	0	0.1	0	1.3	0.4	0.9	0.3	0	zinc finger, SWIM-type containing 5	57643	protein_coding
ENSG00000186603	HPDL			0					0				0		0	0	0	0	0	0	0	0	0	0	0	0	0	0	0	0	0	0	0	0	0	0	0.2	0.3	0.4	0.3	0.3	0	4-hydroxyphenylpyruvate dioxygenase-like	84842	protein_coding
ENSG00000132781	MUTYH			0					0				0		0	1.49299	1.6	0.9	1.9	0	0	0	0	0	0	0	0	0	0	0	0	0	0	0	0	0	0.2	0	0.5	0.3	0	0	mutY homolog	4595	protein_coding
ENSG00000132773	TOE1			0					0			14.9	2		0	29.0935	16.1	31.8	39.4	0	0.3	0.2	0	0.1	0.1	0	0	0	0	0	0	0.1	0	0	0.4	0	1.2	0.8	3	16.1	13.6	7	target of EGR1, member 1 (nuclear)	114034	protein_coding
ENSG00000070759	TESK2			0					0				0		0	2.39724	2.6	2.4	2.2	0	0	0.2	0	0	0	0	0	0	0	0	0	0	0	0	0	0	0	0.3	0	0	0	0	testis-specific kinase 2	10420	protein_coding
ENSG00000236624	CCDC163P			0					0			1.8	2		0	0	0	0	0	0	0	0	0	0	0	0	0	0	0	0	0	0	0	0	0	0	0.3	0	0	2.4	0	1.2	coiled-coil domain containing 163, pseudogene	NA	protein_coding
ENSG00000132763	MMACHC			0					0				0		0	0	0	0	0	0	0	0	0	0	0	0	0	0	0	0	0	0	0	0	0	0	0	0	0	0	0	0	methylmalonic aciduria (cobalamin deficiency) cblC type, with homocystinuria	25974	protein_coding
ENSG00000117450	PRDX1			0					0				0		0	811.977	621.3	888.6	926	1.1	7.7	1.8	4.6	7.9	3.5	8.9	29.8	10	20.3	17.4	3.9	3.8	2.7	1.1	3	0.5	12.2	2.5	8.3	49	7.3	8.7	peroxiredoxin 1	5052	protein_coding
ENSG00000117448	AKR1A1			0					0			121.4	2		0	56.5893	50.6	61.2	57.9	0	0	0.2	0	1.4	0.1	0.3	2.3	0	0	0.1	0	0.1	0.2	0	0.1	0.2	4.3	0	15.2	10.8	9.7	227.6	aldo-keto reductase family 1, member A1 (aldehyde reductase)	10327	protein_coding
ENSG00000132780	NASP			0					0				0		0	427.723	308.9	426	548.2	0.7	0.4	0.2	3.1	1.1	5.5	1.6	5.8	2.5	0.9	2.2	3.7	3.2	0.8	0.3	0.9	0.3	0.7	1.5	3.5	9.6	2.4	3.6	nuclear autoantigenic sperm protein (histone-binding)	4678	protein_coding
ENSG00000159588	CCDC17			0					0				0		0	4.17406	1.8	5	5.7	0	0	0	0	0.2	0	0	0	0	0	0	0	0	0	0	0	0	0.3	0	0	0.3	0	0	coiled-coil domain containing 17	149483	protein_coding
ENSG00000159592	GPBP1L1			0					0				0		0	100.765	73.6	106.1	122.6	0.2	1.8	0.2	0.2	0.8	0.2	19.3	1.6	0.7	3.7	1.9	0.5	1	0.9	0.6	0	0.1	0	2	0.2	1.2	2.4	0.2	GC-rich promoter binding protein 1-like 1	60313	protein_coding
ENSG00000159596	TMEM69			0					0			20.6	1		0	28.2065	28.3	23.7	32.6	0	1.8	0	0	0	0	0	0.8	0.2	0.2	0.2	0	0	0.8	0	0	0	0.8	0	0.2	0.3	20.6	6.5	transmembrane protein 69	51249	protein_coding
ENSG00000197429	IPP			0					0				0		0	229.432	214.6	206	267.7	0	0	0.3	0	1.1	0.1	3.7	0	2	0.3	1.2	0.2	0.6	1.3	0	0.1	0.1	0.5	1.8	0.7	2.4	0.9	3.1	intracisternal A particle-promoted polypeptide	3652	protein_coding
ENSG00000086015	MAST2			0					0			2.2	2		0	1.57227	1.8	0.7	2.2	0	0	0	0.2	0	0	0	0	0	0	0	0	0	0	0	0	0	0.5	0	0	1.8	0	2.6	microtubule associated serine/threonine kinase 2	23139	protein_coding
ENSG00000117461	PIK3R3			0					0			33.6	3		0	84.5142	73.2	89	91.3	0.9	0.1	0	0.3	3.3	0	1.9	2.3	0.7	0.3	0.3	0	0.3	1.1	0	0.3	0.1	44.6	33	3.5	8.4	0.3	23.3	phosphoinositide-3-kinase, regulatory subunit 3 (gamma)	8503	protein_coding
ENSG00000117472	TSPAN1			0					0			1019.1	6		0	97.9685	82.6	111.3	100	0.1	2.1	0.2	0.9	0.2	0.3	1.1	2.5	0.3	0.9	1	0.2	0.3	0.3	0.2	0.4	0	1463.5	912.5	77.4	1765.8	143.5	1751.8	tetraspanin 1	10103	protein_coding
ENSG00000085998	POMGNT1			0					0			2.4	1		0	7.01674	3.1	3.3	14.7	0	0	0	0	0	0	0	0	0	0	0	0	0.1	0	0	0	0.2	0	0	0.2	2.4	0.6	0.5	protein O-linked mannose N-acetylglucosaminyltransferase 1 (beta 1,2-)	55624	protein_coding
ENSG00000171357	LURAP1			0					0				0		0	0	0	0	0	0	0	0	0	0	0	0	0	0	0	0	0	0	0	0	0	0	0	0	0	0	0	0	leucine rich adaptor protein 1	541468	protein_coding
ENSG00000085999	RAD54L			0					0			2.4	1		0	8.12011	5.7	10	8.7	0	0	0	0.2	0	0.1	0	0	0	0.3	0	0	0	0	0	0	0	0.5	0.3	0	2.4	0.6	0.2	RAD54-like (S. cerevisiae)	8438	protein_coding
ENSG00000132128	LRRC41			0					0			81.2	2		0	9.97421	7.3	12.8	9.8	0	0.1	0.5	0	0	0	0	0	0	0.3	0	0	0	0	0	0	0	156.4	1.3	0.4	6	0.3	0.2	leucine rich repeat containing 41	10489	protein_coding
ENSG00000173660	UQCRH			0					0			34	2		0	97.0743	58	87.6	145.7	3.9	2.8	0.3	0.6	0.4	0.1	1.3	1.3	0.3	2.6	0	1.5	0.3	1.8	0.1	0.5	0	15.9	5.3	31.3	36.8	1.5	2.2	ubiquinol-cytochrome c reductase hinge protein	7388	protein_coding
ENSG00000117481	NSUN4			0					0			841.6	4		0	52.1955	36	60.5	60.1	0.1	0	0.2	0	0.2	0	0.4	0.5	0.8	0.2	4.2	0.5	0.4	0	0	0.1	0	53.9	41.1	10.3	3.3	3166.2	105.3	NOP2/Sun domain family, member 4	387338	protein_coding
ENSG00000117480	FAAH			0					0				0		0	0	0	0	0	0	0	0	0	0	0	0	0	0	0	0	0	0	0	0	0	0	0	0	0	0	0	0.2	fatty acid amide hydrolase	2166	protein_coding
ENSG00000197587	DMBX1			0					0				0		0	0	0	0	0	0	0	0	0	0	0	0	0	0	0	0	0	0	0	0	0	0	0	0.3	0.4	0	0	0	diencephalon/mesencephalon homeobox 1	127343	protein_coding
ENSG00000162456	KNCN			0					0				0		0	0	0	0	0	0	0	0	0	0	0	0	0	0	0	0	0	0	0	0	0	0	0	0	0	0	0	0	kinocilin	148930	protein_coding
ENSG00000079277	MKNK1			0					0			6.2	3		0	8.93448	4.5	12.8	9.5	0	0.1	0	0	0	0	0	0.7	0	0.3	0	0.1	0	0	0	0.1	0	6.1	4.1	1.1	0.9	8.5	1.4	MAP kinase interacting serine/threonine kinase 1	8569	protein_coding
ENSG00000142961	MOB3C			0					0				0		0	0	0	0	0	0	0	0	0	0	0	0	0	0	0	0	0	0	0	0	0	0	0.2	0	0	0	0	0	MOB kinase activator 3C	148932	protein_coding
ENSG00000123472	ATPAF1			0					0				0		0	280.501	236.9	306.4	298.2	0.1	2.1	1.2	1.1	0.1	1.7	1	4.3	1.3	2.6	1.2	1.2	0.9	2.2	0.3	0.4	0.1	28.3	0.3	24.4	8.4	9.4	3.4	ATP synthase mitochondrial F1 complex assembly factor 1	64756	protein_coding
ENSG00000159658	EFCAB14			0					0			174.3	2		0	90.9236	90.3	104.2	78.3	0	2.8	0.8	0.7	0.1	0	1.1	0.7	0.1	0.5	0.3	0.5	0.3	0.3	0.1	0.2	0	234.1	0.3	114.6	2.7	2.4	0	EF-hand calcium binding domain 14	9813	protein_coding
ENSG00000186118	TEX38			0					0			124.6	3		0	8.78681	9.6	7.8	9	0	0	0	0	0	0	0	0	0.1	0.5	0	0	0.1	0.1	0	0	0	34.5	0.5	0.2	1.2	12.7	326.4	testis expressed 38	374973	protein_coding
ENSG00000142973	CYP4B1			0					0				0		0	10.9582	9.2	12.6	11.1	0	0.1	0	0.3	0	0.2	0	0	0.4	1.7	0.1	0	0.7	0	0.1	0	0.1	0.2	0.3	0.2	0	0.6	0	cytochrome P450, family 4, subfamily B, polypeptide 1	1580	protein_coding
ENSG00000187048	CYP4A11			0					0				0		0	6.74101	4.5	7.6	8.2	0	0	0	0	0	0	0	0	0	0	0	0.1	0	0	0	0	0	0.3	0	0	0.9	0	0	cytochrome P450, family 4, subfamily A, polypeptide 11	1579	protein_coding
ENSG00000186377	CYP4X1			0					0			41.2	2		0	92.1984	60.8	110.6	105.2	0.1	0	1.7	0.2	0.4	0	0	3.6	0.2	0.9	0.3	0.1	0.3	0	0.2	0.4	0	3.8	0.3	0.5	33.2	0	49.3	cytochrome P450, family 4, subfamily X, polypeptide 1	260293	protein_coding
ENSG00000186160	CYP4Z1			0					0				0		0	5.17957	6.5	3.3	5.7	0	0	0	0	0	0	0	0	0	0	0.2	0	0	0	0.1	0	0	0.2	0.3	0.5	0	0	1	cytochrome P450, family 4, subfamily Z, polypeptide 1	199974	protein_coding
ENSG00000162365	CYP4A22			0					0				0		0	4.30894	4.5	3.6	4.9	0	0	0.2	0.1	0	0	0	0	0	0	0	0	0	0	0	0	0	0.2	0	0.2	0	0	0.5	cytochrome P450, family 4, subfamily A, polypeptide 22	1579	protein_coding
ENSG00000162366	PDZK1IP1			0					0				0		0	9.03695	6.5	9.7	10.9	0.1	0.1	0	0	0	0	0	1.3	0	0.2	0	0	0	0	0	0	0	0.2	0.8	0.2	1.2	0.3	1.7	PDZK1 interacting protein 1	10158	protein_coding
ENSG00000162367	TAL1			0					0			1.7	1		0	0	0	0	0	0	0	0	0	0	0	0	0	0	0	0	0	0	0	0	0	0	1.7	0	0	0	0.3	0	T-cell acute lymphocytic leukemia 1	6886	protein_coding
ENSG00000123473	STIL			0					0				0		0	1.75485	0.4	0.2	4.6	0	0	0	0	0	0	0	0	0	0	0	0	0	0	0	0	0	0.2	0	0.2	0	0.6	0.2	SCL/TAL1 interrupting locus	6491	protein_coding
ENSG00000162368	CMPK1			0					0			1125.2	5		0	20.8274	19.1	27.1	16.3	0.1	0	0	0	0.2	0	0	0.2	1.7	0.2	0	0	1	0	0	0.4	0	742.2	2113.3	2486.3	2.7	53.6	230.5	cytidine monophosphate (UMP-CMP) kinase 1, cytosolic	51727	protein_coding
ENSG00000186790	FOXE3			0					0				0		0	0	0	0	0	0	0	0	0	0	0	0	0	0	0	0	0	0	0	0	0	0	0.2	0	0.2	0.3	0	0.7	forkhead box E3	2301	protein_coding
ENSG00000186564	FOXD2			0					0				0		0	0	0	0	0	0	0	0	0	0	0	0	0	0	0	0	0	0	0	0	0	0	0.7	0.3	0.2	0	0.6	0	forkhead box D2	2306	protein_coding
ENSG00000269113	TRABD2B			0					0			2.2	2		0	0	0	0	0	0	0	0	0	0	0	0	0	0	0	0	0	0	0	0	0	0	0.2	3.3	0	0	0.9	1.2	TraB domain containing 2B	388630	protein_coding
ENSG00000273395	FLJ00388			0					0				0		0	0	0	0	0	0	0	0	0	0	0	0	0	0	0	0	0	0	0	0	0	0	0	0	0	0	0	0.2		NA	protein_coding
ENSG00000269709	AL109659.1			0					0				0		0	0	0	0	0	0	0	0	0.1	0	0	0	0	0	0	0	0	0	0	0	0	0	0.2	0.5	0	0	0	0.5	HCG1780467; PRO0529; Uncharacterized protein	NA	protein_coding
ENSG00000117834	SLC5A9			0					0				0		0	0.0677956	0.2	0	0	0	0	0	0	0	0	0	0	0	0	0	0	0	0	0	0	0	0	0.3	0	0	0.6	0.2	solute carrier family 5 (sodium/sugar cotransporter), member 9	200010	protein_coding
ENSG00000132122	SPATA6			0					0			757.7	1		0	651.534	707.2	702.8	544.7	4.3	16.2	1.1	3.5	9.8	1.2	4.7	18.3	2.7	9.9	9.7	1.6	0.7	5.1	0.2	2.1	0.4	757.7	2.3	52.9	30.8	4.5	13.5	spermatogenesis associated 6	54558	protein_coding
ENSG00000186094	AGBL4			0					0			196.2	1		0	26.9383	16.1	37	27.7	0	0	0.2	0	0	0.2	0	1.2	0	0	0	0	0	0.4	0	0.1	0	2	0	0.4	0.9	196.2	6.7	ATP/GTP binding protein-like 4	84871	protein_coding
ENSG00000162373	BEND5			0					0				0		0	8.86276	10.4	11.9	4.3	0	0	0	0	0	0	0	0.5	0	0.2	0	0	0	0	0	0	0	0	0.3	0	1.8	0	0.2	BEN domain containing 5	79656	protein_coding
ENSG00000227839	AL645730.2			0					0				0		0	0	0	0	0	0	0	0	0	0	0	0	0	0	0	0	0	0	0	0	0	0	0	0	0	0	0	0		NA	protein_coding
ENSG00000162374	ELAVL4			0					0			182.8	1		0	98.4047	99.5	117.5	78.3	0.2	0.6	0.3	0	0.6	0	0.8	1	0.3	1.9	0.8	0	0.1	0	0	0.9	0.1	2.1	12.4	0.5	11.4	182.8	0.2	ELAV like neuron-specific RNA binding protein 4	1996	protein_coding
ENSG00000142700	DMRTA2			0					0				0		0	0	0	0	0	0	0	0	0	0	0	0	0	0	0	0	0	0	0	0	0	0	0.2	0	0	0	0	0.5	DMRT-like family A2	63950	protein_coding
ENSG00000185104	FAF1			0					0				0		0	317.089	327	343.2	281	0.5	7.4	0.6	1.3	1.7	1.6	2.1	7.7	1.2	5.5	6.3	0.9	0.7	1.2	0.2	1	0.1	19.8	0	5.1	12.6	7.3	6.7	Fas (TNFRSF6) associated factor 1	11124	protein_coding
ENSG00000123080	CDKN2C			0					0				0		0	27.2791	24	26.6	31.3	0	0	0	0.3	0	0	0	1	0	1.2	0.1	0.1	0	0	0	0	0	0.2	0.3	0.4	0.9	0.9	0.2	cyclin-dependent kinase inhibitor 2C (p18, inhibits CDK4)	1031	protein_coding
ENSG00000204006	C1orf185			0					0				0		0	36.8886	48.6	23.7	38.3	1.2	0.5	0	2.7	0	0	1.3	0	0	0	0.2	0	0	0.3	0	0	0	0	0	3.5	0	2.1	1	chromosome 1 open reading frame 185	284546	protein_coding
ENSG00000123091	RNF11			0					0				0		0	5.95705	8.5	6.9	2.4	0	0	0	0	0	0	0	1.5	0.1	0	0.1	0	0	0	0	0	0	0	0	0.4	0.3	0	0	ring finger protein 11	26994	protein_coding
ENSG00000085831	TTC39A			0					0			64.3	2		0	27.3685	24	28.5	29.6	0.1	2.6	0	1.2	0.1	0	0	0.5	0.1	0.7	0.6	0.3	0.3	0.1	0	0.2	0.2	38.3	90.3	0.5	2.4	3	2.6	tetratricopeptide repeat domain 39A	22996	protein_coding
ENSG00000085832	EPS15			0					0				0		0	106.293	112.5	126.5	79.9	0.7	11.5	0	0	0.4	0.3	2.2	2.5	0.1	0.5	0.7	0	0.3	0.2	0	0	0	2.5	2.5	1.1	4.2	0.9	1	epidermal growth factor receptor pathway substrate 15	2060	protein_coding
ENSG00000117859	OSBPL9			0					0			422.7	3		0	491.229	477.3	444.1	552.3	0.7	6.6	0.2	2	3.3	1.6	4.6	1.3	2.1	8	4.4	1.7	0.9	2.6	0.3	1.2	0.4	123	25.4	67.8	925.2	45.1	219.9	oxysterol binding protein-like 9	114883	protein_coding
ENSG00000078618	NRD1			0					0				0		0	920.949	732.8	1023.9	1006.2	4.3	19.1	1.2	10.6	0.9	1.5	12.3	19.3	3.8	15.7	16	1.6	1.4	2.8	1.7	1.3	0.6	11.2	95.6	64.3	41.8	5.8	7.7	nardilysin (N-arginine dibasic convertase)	4898	protein_coding
ENSG00000169213	RAB3B			0					0				0		0	0	0	0	0	0	0	0	0	0	0	0	0	0	0	0	0	0	0	0	0	0	0	0	0.2	0	0.3	0.2	RAB3B, member RAS oncogene family	5865	protein_coding
ENSG00000117862	TXNDC12			0					0			16.6	2		0	56.6108	55.1	57.9	56.8	0.1	0.4	0.6	0.9	1.3	0.9	0	2.6	0.5	1.9	0.2	0.9	0	0.4	0	0.1	0	1.5	1.3	5.3	13.1	18.5	14.7	thioredoxin domain containing 12 (endoplasmic reticulum)	51060	protein_coding
ENSG00000198841	KTI12			0					0				0		0	10.7692	7.3	9.5	15.5	0.5	0.1	0	0	0	0	0.1	0	0.1	0.2	0	0.2	0	0.2	0	0.1	0	1.8	0.5	0.4	0.6	0	0	KTI12 homolog, chromatin associated (S. cerevisiae)	112970	protein_coding
ENSG00000134717	BTF3L4			0					0				0		0	62.7896	77.3	56.7	54.4	1	3.6	0.3	0.1	0.3	0	0.3	0.3	0.9	1.2	1.1	0.1	0.1	0.2	0	0	0	2.5	0	1.8	2.1	11.5	5.8	basic transcription factor 3-like 4	91408	protein_coding
ENSG00000157077	ZFYVE9			0					0			69.6	1		0	49.5757	46.8	54.1	47.8	1.1	0	0.3	0	0	0	0	2	0	0	1.3	0	0.1	0.1	0.1	0.1	0.1	69.6	2.3	0.2	0.3	0.6	1	zinc finger, FYVE domain containing 9	9372	protein_coding
ENSG00000154222	CC2D1B			0					0				0		0	0	0	0	0	0	0	0	0	0	0	0	0	0	0	0	0	0	0	0	0	0	0.5	0	0	0.6	0.3	0.7	coiled-coil and C2 domain containing 1B	200014	protein_coding
ENSG00000085840	ORC1			0					0				0		0	0	0	0	0	0	0.1	0	0	0	0	0	0	0	0	0	0	0	0	0	0	0	0.2	0	0	0	0	0	origin recognition complex, subunit 1	4998	protein_coding
ENSG00000134748	PRPF38A			0					0				0		0	31.2652	23.8	43.9	26.1	0	0	0	0	0.1	0	0	1.2	0.3	0	0	0	0	0.3	0	0.2	0	0.2	0	0	1.2	0	0	pre-mRNA processing factor 38A	84950	protein_coding
ENSG00000134744	ZCCHC11			0					0			674.7	5		0	113.598	104.9	101.6	134.3	0.6	0.5	0.8	0.4	0.6	0.1	0.5	0.8	0.5	1.7	0.9	0.3	0.7	1.2	0.1	0	0.1	61.3	21.6	97.2	323.3	135	2756.7	zinc finger, CCHC domain containing 11	23318	protein_coding
ENSG00000116157	GPX7			0					0				0		0	2.98498	2	4.7	2.2	0	0	0	0	0.1	0	0	0	0	0	0.2	0	0	0.1	0	0	0	0	0	0.2	0	0	0	glutathione peroxidase 7	2882	protein_coding
ENSG00000182183	FAM159A			0					0				0		0	0	0	0	0	0	0	0	0	0	0	0	0	0	0	0	0	0	0	0	0	0	0	0	0	0	0	0	family with sequence similarity 159, member A	348378	protein_coding
ENSG00000162377	COA7			0					0				0		0	28.9847	25	32	29.9	0.1	1	0	1.2	0	0.1	0	0.2	0	0.2	0.1	0.1	0.3	0	0	0.1	0.1	3.5	0.5	1.4	3.3	0	0	cytochrome c oxidase assembly factor 7	65260	protein_coding
ENSG00000162378	ZYG11B			0					0				0		0	24.4979	15.3	29.4	28.8	0	0	0	0	0	0	0	0	0	0	0.2	0.1	0	0	0	0	0	0	0.5	0	0.3	0	0.2	zyg-11 family member B, cell cycle regulator	79699	protein_coding
ENSG00000203995	ZYG11A			0					0				0		0	4.66039	2	5.7	6.3	0	0	0	0	0	0	0	0	0	0	0	0	0	0	0	0	0	0.3	0.5	0.2	0.3	0.3	0.2	zyg-11 family member A, cell cycle regulator	440590	protein_coding
ENSG00000121310	ECHDC2			0					0			2.1	1		0	5.60969	5.1	5.2	6.5	0	0.1	0	0.1	0	0	0	0	0	0.2	0	0.1	0	0.1	0	0	0	0.7	1	0.5	0	2.1	0.5	enoyl CoA hydratase domain containing 2	55268	protein_coding
ENSG00000116171	SCP2			0					0				0		0	265.73	238	244.2	315	2.2	22.7	0.6	3	1.3	0.6	1.5	5.6	4	7.3	4.8	0.8	0.6	1.5	0.4	2.1	0	3	1.5	3	14.9	2.1	12	sterol carrier protein 2	6342	protein_coding
ENSG00000174348	PODN			0					0				0		0	0	0	0	0	0	0	0	0	0	0	0	0	0	0	0	0	0	0	0	0	0	0	0	0.7	0	0.3	0.7	podocan	127435	protein_coding
ENSG00000162383	SLC1A7			0					0			1.7	1		0	0	0	0	0	0	0	0	0	0	0	0	0	0	0	0	0	0	0	0	0	0	0.5	0.8	0.2	0.6	0.3	1.7	solute carrier family 1 (glutamate transporter), member 7	6512	protein_coding
ENSG00000162384	C1orf123			0					0			556.5	5		0	89.9022	52.3	82.4	135.1	0.2	1.8	0.3	0.4	0.4	0.2	1.3	1.2	0.8	1.4	1.8	0.2	1.4	1.6	0.4	0	0.1	1107.8	768.2	383.2	7.8	181.6	341.6	chromosome 1 open reading frame 123	54987	protein_coding
ENSG00000162385	MAGOH			0					0			741.7	5		0	77.2982	63.7	52.5	115.8	1.1	2.1	0	0.2	0.4	1.3	0.2	6.3	2	0	2	0.7	0.4	0.5	0.1	1.9	0.2	278.5	214.8	39	12.6	1483.6	1692.4	mago-nashi homolog, proliferation-associated (Drosophila)	4116	protein_coding
ENSG00000157193	LRP8			0					0				0		0	10.7778	8.5	12.1	11.7	0	1.8	0	0	0	0.1	0	0	0	0	0	0	0	0	0	0	0	0.3	0	0.2	0.3	0.3	0.5	low density lipoprotein receptor-related protein 8, apolipoprotein e receptor	7804	protein_coding
ENSG00000143006	DMRTB1			0					0				0		0	0	0	0	0	0	0	0	0	0	0	0	0	0	0	0	0	0	0	0	0	0	0.3	0	0.2	0	0	0	DMRT-like family B with proline-rich C-terminal, 1	63948	protein_coding
ENSG00000174332	GLIS1			0					0				0		0	0	0	0	0	0	0	0	0	0	0	0	0	0	0	0	0	0	0	0	0	0	0.2	0.5	0	0.6	0.3	0	GLIS family zinc finger 1	148979	protein_coding
ENSG00000058804	NDC1			0					0			6.1	1		0	22.0566	25.8	27.3	13	0	1.7	0	0.2	0	0.4	0.1	0.3	0.7	0.5	0	0	0	0	0	0.5	0	0.8	6.1	0.5	0	1.2	0.2	NDC1 transmembrane nucleoporin	55706	protein_coding
ENSG00000058799	YIPF1			0					0			50.7	1		0	57.6686	44.1	63.4	65.5	0.1	0	0	0	0	0	0.1	0	0.7	0.5	0	0.2	0	0.1	0	0.2	0.1	0.3	50.7	2.3	5.7	0.6	1.2	Yip1 domain family, member 1	54432	protein_coding
ENSG00000211452	DIO1			0					0				0		0	74.0656	64.7	75.7	81.8	0.1	1.7	0.2	0.8	0	0.2	0.4	0.3	0.4	0.9	2.1	0.2	0.3	0.1	0	0.2	0	2.3	0	0.5	3.9	0.3	0	deiodinase, iodothyronine, type I	1733	protein_coding
ENSG00000081870	HSPB11			0					0				0		0	93.8973	114.3	84.5	82.9	2.2	4.5	0	0.1	0	0	0.9	0	0	3.4	2.9	0.2	0.6	1	0	1.1	0	0.5	7.6	1.4	8.1	0	0.7	heat shock protein family B (small), member 11	51668	protein_coding
ENSG00000116212	LRRC42			0					0				0		0	27.5623	25.4	24.9	32.3	0	1.8	0	0	0.2	0	0	0	0	0	0	0.1	0.6	0	0	0	0	0.3	0.3	0	0.3	2.1	0	leucine rich repeat containing 42	115353	protein_coding
ENSG00000203985	LDLRAD1			0					0				0		0	0	0	0	0	0	0	0	0	0	0	0	0	0	0	0	0	0	0	0	0	0	0	0	0	0	0.3	0	low density lipoprotein receptor class A domain containing 1	388633	protein_coding
ENSG00000116209	TMEM59			0					0				0		0	657.737	852.6	628.9	491.7	17.1	13.5	3.4	8.3	8.2	5.7	10.9	17	11.1	23.9	19.3	2	2.2	6.8	0.3	8.1	0.4	15.5	5.6	33.3	19.1	53.9	30.5	transmembrane protein 59	9528	protein_coding
ENSG00000116205	TCEANC2			0					0				0		0	3.02899	5.9	2.4	0.8	0	0	0	0	0.1	0	0	0	0	0	0.1	0	0	0	0	0	0	0.2	0	0	0.6	0	0	transcription elongation factor A (SII) N-terminal and central domain containing 2	127428	protein_coding
ENSG00000212670	AL161915.1			0					0				0		0	0	0	0	0	0	0	0	0	0	0	0	0	0	0	0	0	0	0	0	0	0	0	0	0	0	0	0	Uncharacterized protein	NA	protein_coding
ENSG00000157211	CDCP2			0					0				0		0	0	0	0	0	0	0	0	0	0	0	0	0	0	0	0	0	0	0	0	0	0	0.2	0	0	0	0	0	CUB domain containing protein 2	200008	protein_coding
ENSG00000256407	RP11-446E24.4			0					0				0		0	0	0	0	0	0	0	0	0	0	0	0	0	0	0	0	0	0	0	0	0	0	0	0	0	0	0	0	NADH-cytochrome b5 reductase-like; Uncharacterized protein	NA	protein_coding
ENSG00000248835	AL357673.1			0					0				0		0	0	0	0	0	0	0	0	0	0	0	0	0	0	0	0	0	0	0	0	0	0	0	0	0	0	0.3	0.2	CDNA: FLJ21031 fis, clone CAE07336; HCG1780521; Uncharacterized protein	NA	protein_coding
ENSG00000215883	CYB5RL			0					0				0		0	0	0	0	0	0	0	0	0	0	0	0	0	0	0	0	0	0	0	0	0	0	0	0	0.2	0	0.3	0	cytochrome b5 reductase-like	606495	protein_coding
ENSG00000116221	MRPL37			0					0			106.7	3		0	67.0484	61	73.8	66.3	0	3.9	0	0.3	0.2	0	0.9	0	0.2	0.5	0.1	0.5	0.3	0.3	0.1	0	0	7.4	0.3	20.2	3.9	36.3	263.7	mitochondrial ribosomal protein L37	51253	protein_coding
ENSG00000157216	SSBP3			0					0				0		0	0	0	0	0	0	0	0	0	0	0	0	0	0	0	0	0	0	0	0	0	0	0.2	0.3	0.7	0.3	0	0	single stranded DNA binding protein 3	23648	protein_coding
ENSG00000198711	SSBP3-AS1			0					0				0		0	0	0	0	0	0	0	0	0	0	0	0	0	0	0	0	0	0	0	0	0	0	0	0	0	0	0	0	SSBP3 antisense RNA 1	NA	protein_coding
ENSG00000162390	ACOT11			0					0				0		0	0.237338	0	0.7	0	0	0.1	0	0	0	0	0	0	0	0	0	0	0	0	0	0	0	0.2	0	0	0	0	0	acyl-CoA thioesterase 11	26027	protein_coding
ENSG00000162391	FAM151A			0					0			1.1	1		0	0.181194	0	0	0.5	0	0	0	0	0	0	0	0	0	0	0	0	0	0	0	0	0	0.2	0.3	1.1	0	0.3	0.2	family with sequence similarity 151, member A	338094	protein_coding
ENSG00000271723	MROH7-TTC4			0					0				0		0	0	0	0	0	0	0	0	0	0	0	0	0	0	0	0	0	0	0	0	0	0	0	0	0	0	0	0	MROH7-TTC4 readthrough (NMD candidate)	NA	protein_coding
ENSG00000184313	MROH7			0					0			1.4	2		0	1.99108	0.6	2.4	3	0	0	0	0	0	0	0	0	0	0	0	0	0	0.2	0	0	0	0	0	0	1.5	1.2	0	maestro heat-like repeat family member 7	374977	protein_coding
ENSG00000243725	TTC4			0					0				0		0	84.2643	56.3	92.1	104.4	0	0.6	0	0	0.2	0	0.5	0.3	0.8	0	0.1	0.5	0.1	0.3	0	0	0	3.3	0.3	0.7	0.6	1.2	0	tetratricopeptide repeat domain 4	7268	protein_coding
ENSG00000162396	PARS2			0					0				0		0	0	0	0	0	0	0	0	0	0	0	0	0	0	0	0	0	0	0	0	0	0	0	0	0	0	0	0	prolyl-tRNA synthetase 2, mitochondrial (putative)	25973	protein_coding
ENSG00000006555	TTC22			0					0				0		0	0	0	0	0	0	0	0	0	0	0	0	0	0	0	0	0	0	0	0	0	0	0	0	0.2	0	0	0	tetratricopeptide repeat domain 22	55001	protein_coding
ENSG00000162398	C1orf177			0					0				0		0	1.22164	0.6	1.4	1.6	0	0	0	0	0	0	0	0	0	0	0	0	0	0	0	0	0	0	0	0	0.3	0	0	chromosome 1 open reading frame 177	163747	protein_coding
ENSG00000116133	DHCR24			0					0				0		0	0.158393	0.2	0	0.3	0	0	0	0	0	0	0	0	0	0	0	0	0	0	0	0	0	0	0	0.2	0	0	0.2	24-dehydrocholesterol reductase	1718	protein_coding
ENSG00000143001	TMEM61			0					0				0		0	0	0	0	0	0	0	0	0	0	0	0	0	0	0	0	0	0	0	0	0	0	0	0	0	0.3	0	0	transmembrane protein 61	199964	protein_coding
ENSG00000162399	BSND			0					0				0		0	0	0	0	0	0	0	0	0	0	0	0.2	0	0	0	0	0	0	0	0	0	0	0	0	0.2	0.3	0	0	Bartter syndrome, infantile, with sensorineural deafness (Barttin)	7809	protein_coding
ENSG00000169174	PCSK9			0					0				0		0	0	0	0	0	0	0	0	0	0	0	0	0	0	0	0	0	0	0	0	0	0	0	0	0.2	0	0	0	proprotein convertase subtilisin/kexin type 9	255738	protein_coding
ENSG00000162402	USP24			0					0			336.5	2		0	59.4246	58.4	63.4	56.5	0	0	0	0.3	0.4	0	0	4.9	0	1	0.2	0.3	0.1	0.2	0	0.1	0	625.6	0.5	47.3	2.7	1.5	7.5	ubiquitin specific peptidase 24	23358	protein_coding
ENSG00000162407	PPAP2B			0					0				0		0	72.0491	50.2	75.9	90	0.1	0.1	0	0.1	0.6	0	0.1	0.2	0.2	1.2	0.2	1	0.1	0	0.6	1.2	0	0.8	0	2.7	9.9	1.5	0.7	phosphatidic acid phosphatase type 2B	8613	protein_coding
ENSG00000162409	PRKAA2			0					0				0		0	2.10282	3.1	1.9	1.4	0	0	0	0	0	0	0	0	0	0	0.4	0	0	0	0	0	0	0	0.3	0.2	0.6	0.6	0.2	protein kinase, AMP-activated, alpha 2 catalytic subunit	5563	protein_coding
ENSG00000187889	C1orf168			0					0				0		0	50.1984	51.5	49.1	50	0	0.3	0.5	0	3.5	0	0.3	0.5	0.7	2	1.8	0	0.3	0.1	0	0.1	0	0.7	0	0.4	2.1	0.6	0.7	chromosome 1 open reading frame 168	199920	protein_coding
ENSG00000157131	C8A			0					0				0		0	0	0	0	0	0	0	0	0	0	0	0	0	0	0	0	0	0	0	0	0	0	0.7	0.3	0	0	0.6	0.7	complement component 8, alpha polypeptide	731	protein_coding
ENSG00000021852	C8B			0					0			3.6	1		0	5.75793	2.2	6.9	8.2	0	0.3	0	0	1	0	0	0	0	0.5	0	0	0	0	0	0	0	0.3	0.5	0.4	0.3	0	3.6	complement component 8, beta polypeptide	732	protein_coding
ENSG00000173406	DAB1			0					0				0		0	0.328102	0.2	0.2	0.5	0	0	0	0	0	0	0	0	0	0	0	0	0	0	0	0	0	0.2	0.3	0.4	0.3	0	0.2	Dab, reelin signal transducer, homolog 1 (Drosophila)	1600	protein_coding
ENSG00000162600	OMA1			0					0				0		0	251.533	252.8	271	230.8	0.1	1.5	1.4	1.5	1.3	0.5	0.4	1.6	5.2	1.9	2	5.1	0.1	5.9	0.5	1.3	0	0.8	0.3	0.7	6.9	36	12.3	OMA1 zinc metallopeptidase	115209	protein_coding
ENSG00000184292	TACSTD2			0					0				0		0	0.0677956	0.2	0	0	0	0	0	0	0	0	0	0	0	0	0.2	0	0	0	0	0	0	0	0.3	0	0.6	0.6	0.7	tumor-associated calcium signal transducer 2	4070	protein_coding
ENSG00000162601	MYSM1			0					0				0		0	8.01543	8.7	10.7	4.6	1.8	0	0	0	0	0	1.1	0	0	0	0.3	0	0.3	0	0	0	0	1.3	0.3	1.1	0.3	0.6	0.2	Myb-like, SWIRM and MPN domains 1	114803	protein_coding
ENSG00000177606	JUN			0					0				0		0	0	0	0	0	0	0	0	0	0	0	0	0	0	0	0	0	0	0	0	0	0	0.2	0	0	0.3	0	0	jun proto-oncogene	3725	protein_coding
ENSG00000172456	FGGY			0					0				0		0	150.195	97.2	149.5	203.8	0.2	0	0.2	2	0.4	0	0.3	1	0.9	0	2.9	0	0.3	0.2	0	0.7	0.3	0	1	5.7	4.2	1.2	1.9	FGGY carbohydrate kinase domain containing	55277	protein_coding
ENSG00000134709	HOOK1			0					0			2161.8	5		0	298.445	385.8	283.4	226.1	2.2	5.7	0.8	3.3	3.6	1.6	0.4	2.8	5.3	3.2	3.2	0.9	1	2.3	0.1	0.4	0.1	962.9	1365.2	5254.1	3143.4	63.3	83.6	hook microtubule-tethering protein 1	51361	protein_coding
ENSG00000162598	C1orf87			0					0				0		0	26.7854	16.3	28.5	35.6	0	0	0	0.9	0	0	0	0	0.1	0	0	0.1	0	0	0	0	0	0.2	0	0	0	0	0	chromosome 1 open reading frame 87	127795	protein_coding
ENSG00000162599	NFIA			0					0			49.8	2		0	27.0993	20.9	28	32.3	0	0.8	0	0	0	0	0	1	0.1	0	0	0.3	0	0	0.1	0.2	0	87.1	0.5	12.4	0.6	0	0.2	nuclear factor I/A	4774	protein_coding
ENSG00000162604	TM2D1			0					0			1586.6	1		0	142.645	153.2	149.8	125	0.7	1.9	0.6	0.3	0.4	0.8	1	5.9	0.3	1.5	2.2	0.6	0.6	1	0	1.6	0	31.1	0.8	5.1	4.2	1586.6	12.3	TM2 domain containing 1	83941	protein_coding
ENSG00000132849	INADL			0					0			13773.4	3		0	74.5849	80.1	77.8	65.8	1.2	0.1	0	0.1	0.4	0.8	0	0	0.8	1	0.5	0.1	0	0.5	0.1	0.1	0.3	569.8	10.9	8	40702.3	8.8	48.1	InaD-like (Drosophila)	10207	protein_coding
ENSG00000240563	L1TD1			0					0				0		0	15.1861	8.1	8.1	29.4	0	0	0	0	0	0	0	2.6	0	0	0	0	0	0	0	0	0	0	0.3	0	1.5	0	0	LINE-1 type transposase domain containing 1	54596	protein_coding
ENSG00000132854	KANK4			0					0			1.5	1		0	0.0905969	0	0	0.3	0	0	0	0	0	0	0	0	0	0	0	0	0	0	0	0	0	0	1.5	0.5	0.3	0.6	0.5	KN motif and ankyrin repeat domains 4	163782	protein_coding
ENSG00000162607	USP1			0					0			251.4	4		0	314.614	336.4	309	298.4	1	6.8	1.2	6.2	1.1	0.9	1.1	5.8	2	3.6	3.9	0.7	0.7	1.8	0.1	0.5	0.1	92.4	579.2	235.5	6.9	98.4	19	ubiquitin specific peptidase 1	7398	protein_coding
ENSG00000116641	DOCK7			0					0			90.6	1		0	292.206	346.4	309	221.2	3.7	0	0.3	0.6	1.2	1.6	4.5	8.7	0	7	3.2	3	1.4	1.6	0.5	0.8	0.2	51.6	5.3	12.7	55	3.9	90.6	dedicator of cytokinesis 7	85440	protein_coding
ENSG00000269624	AL138847.1			0					0				0		0	0	0	0	0	0	0	0	0	0	0	0	0	0	0	0	0	0	0	0	0	0	0	0	0	0	0	0	CDNA FLJ26506 fis, clone KDN07105; Uncharacterized protein	NA	protein_coding
ENSG00000125703	ATG4C			0					0			380.3	1		0	142.302	194	142.6	90.2	0.1	8.8	0.2	1.8	0.4	0.9	4	1	2.3	1	2	0.3	0.1	0.1	0	0.4	0.1	380.3	0.3	1.9	5.1	1.5	1	autophagy related 4C, cysteine peptidase	84938	protein_coding
ENSG00000187140	FOXD3			0					0				0		0	0	0	0	0	0	0	0	0	0	0	0	0	0	0	0	0	0	0	0	0	0	0.5	0	0.4	0.6	0.3	0.7	forkhead box D3	27022	protein_coding
ENSG00000088035	ALG6			0					0				0		0	153.309	223.3	145	91.6	0.3	0.5	0.2	0.1	1	0.3	1	1.8	2.3	7.2	2.5	0.5	0.6	1	0.3	2.4	0.2	4	2	2.1	7.5	0.6	0.5	ALG6, alpha-1,3-glucosyltransferase	29929	protein_coding
ENSG00000142856	ITGB3BP			0					0			1038.8	3		0	529.847	600.2	574.6	414.8	9	5.5	97.3	2.3	4	2.8	9.5	20.6	8.7	10.1	5.2	0.3	0.3	3.2	0	2	0	767.1	484.4	1864.9	21.5	30.6	5.3	integrin beta 3 binding protein (beta3-endonexin)	23421	protein_coding
ENSG00000203965	EFCAB7			0					0			87.1	2		0	199.732	218.2	178.5	202.5	4.9	1.7	0.9	0.1	0.8	3.1	1.9	5.9	0.7	4.8	1	0.7	0.4	0.1	0	0.2	0	8.4	2.8	59.9	1.8	2.1	114.4	EF-hand calcium binding domain 7	84455	protein_coding
ENSG00000116652	DLEU2L			0					0				0		0	11.2318	8.1	11.2	14.4	0	0.1	0	0	0	0.1	0.4	0	0	0.3	0.1	0	0	0	0	0	0	0	0	0.2	0	0	0.2	deleted in lymphocytic leukemia 2-like	NA	protein_coding
ENSG00000079739	PGM1			0					0			4693	6		0	63.6177	50.8	67.2	72.8	0.1	0.5	0.5	0.3	0	0.4	0	1.2	0.2	1.9	0.8	0	0.6	0.3	0.1	0.2	0.2	3795.5	14010.1	8028.7	584.8	561.2	1177.8	phosphoglucomutase 1	5236	protein_coding
ENSG00000185483	ROR1			0					0			49.3	1		0	35.9989	35.8	30.6	41.6	0.6	0	0	0.3	0	0	1.1	2.8	0	1.4	0.3	0	0.1	0	0	0	0.1	0.7	1	0.4	2.1	49.3	0.2	receptor tyrosine kinase-like orphan receptor 1	4919	protein_coding
ENSG00000177414	UBE2U			0					0			1455.7	1		0	354.76	459.7	339.6	265	0	6.8	8.8	2.4	4.8	1.5	0.9	1.6	4	2.9	2.7	1	0.3	0.7	0	1.6	0.1	14.2	1455.7	19.7	64.5	1.2	2.6	ubiquitin-conjugating enzyme E2U (putative)	148581	protein_coding
ENSG00000158966	CACHD1			0					0			87.5	2		0	16.5142	11	17.1	21.5	0.1	0	0.3	0.1	0	0.1	0	0.3	0.2	0	0	0.1	0.1	0	0	0.1	0.1	4	0.5	0	0.9	13.6	161.3	cache domain containing 1	57685	protein_coding
ENSG00000162437	RAVER2			0					0			18.5	1		0	37.6651	27.7	37.5	47.8	0	0.8	0	0.7	0.1	0	0.7	0	0.3	0.2	0	0	0	0.1	0	0.2	0	1.7	0	0.4	1.2	2.7	18.5	ribonucleoprotein, PTB-binding 2	55225	protein_coding
ENSG00000162434	JAK1			0					0				0		0	101.854	96.4	111.3	97.8	0	0.5	0.3	0.1	0.5	0.3	0.1	0.2	0.2	1.9	3.9	0.2	0	0	0	0.3	0	2.8	7.1	5	2.4	4.8	4.3	Janus kinase 1	3716	protein_coding
ENSG00000162433	AK4			0					0			15.7	5		0	19.0414	8.7	16.9	31.5	0	0.3	0	0.1	0	0	0	0	0	0.2	0	0.1	0	0	0	0.1	0	11.9	13.7	15.6	22.4	0.3	14.9	adenylate kinase 4	205	protein_coding
ENSG00000116675	DNAJC6			0					0			1.3	2		0	1.32251	2.2	1.2	0.5	0	0	0	0	0	0	0	0	0	0	0	0	0	0	0	0	0	0.5	1	1.6	0.6	0.3	0	DnaJ (Hsp40) homolog, subfamily C, member 6	9829	protein_coding
ENSG00000116678	LEPR			0					0				0		0	85.4731	92.5	73.1	90.8	1	5.9	2.6	0.1	0	2.2	0	7.1	4.3	0.2	2.7	0	0	1	0	0.2	0	1.5	0.5	1.2	1.8	0.3	0	leptin receptor	3953	protein_coding
ENSG00000213625	LEPROT			0					0				0		0	74.6039	69.2	78.6	76.1	0.1	0.4	0.5	0.5	0.1	0.2	0.4	2	0.3	4.6	2.1	0.6	0.3	0.3	0	0.6	0	2.3	0.8	0.9	4.5	0.3	3.6	leptin receptor overlapping transcript	54741	protein_coding
ENSG00000184588	PDE4B			0					0				0		0	14.6454	13.2	15	15.8	0.1	0.3	0	0	0	0	0	0.2	0	0.3	0	0	0.1	0	0	0	0	0.3	0	0	1.2	0	0.2	phosphodiesterase 4B, cAMP-specific	5142	protein_coding
ENSG00000118473	SGIP1			0					0			852.1	5		0	71.9655	66.5	64.3	85.1	0.5	3.5	0.5	0.2	0.1	0.3	0.1	0.8	0	0.7	0.9	0.1	0.4	0	0	0	0	360.8	145.3	1429	15.8	582.4	1742.9	SH3-domain GRB2-like (endophilin) interacting protein 1	84251	protein_coding
ENSG00000248458	AL139147.1			0					0				0		0	0	0	0	0	0	0	0	0	0	0	0	0	0	0	0	0	0	0	0	0	0	0	0	0	0	0	0	Uncharacterized protein	NA	protein_coding
ENSG00000152760	TCTEX1D1			0					0				0		0	3.07493	5.9	1.4	1.9	0	0	0	0	0	0	0	0	0	0.2	0	0	0	0	0	0	0	0	0	0.4	0	0	0	Tctex1 domain containing 1	200132	protein_coding
ENSG00000172410	INSL5			0					0				0		0	0	0	0	0	0	0	0	0	0	0	0	0	0	0	0	0	0	0	0	0	0	0	0	0	0	0	0.5	insulin-like 5	10022	protein_coding
ENSG00000152763	WDR78			0					0			83.4	1		0	327.005	435.2	297.6	248.1	0	18.4	1.2	0.9	1.3	0.1	1.9	5.3	3	5.3	1.3	0.5	1.2	3.1	0	0.9	0	11.9	0.3	2.1	9	2.1	83.4	WD repeat domain 78	79819	protein_coding
ENSG00000198160	MIER1			0					0			48.6	1		0	54.0603	74	57.4	30.7	1.1	0	0.2	0.3	0	0	0	3.3	0.2	0.2	2.2	0.3	0	0.5	0	0.3	0.1	48.6	8.1	2.5	7.8	3.3	3.4	mesoderm induction early response 1, transcriptional regulator	57708	protein_coding
ENSG00000116704	SLC35D1			0					0				0		0	72.2313	60.8	79.5	76.4	0	1.7	0.2	0	0.3	0	0.1	0	1.8	1.7	1	0.1	0.6	0.2	0	7.7	0.1	0.8	0	0.7	2.4	0.6	2.9	solute carrier family 35 (UDP-GlcA/UDP-GalNAc transporter), member D1	23169	protein_coding
ENSG00000203963	C1orf141			0					0				0		0	3.94904	2.8	1.7	7.3	0	0	0	0	0	0	0	0	0	0	0	0.2	0	0	0	0	0	0.3	0	0.7	0	0.3	0.2	chromosome 1 open reading frame 141	400757	protein_coding
ENSG00000162594	IL23R			0					0				0		0	2.51048	2.2	2.8	2.4	0	0	0	0	0	0	0	0	0	0	0	0	0.1	0	0	0	0	0.8	0.3	0.2	0	0.3	0	interleukin 23 receptor	149233	protein_coding
ENSG00000081985	IL12RB2			0					0				0		0	10.0089	6.1	13.1	10.9	0	0	0	0	0	0	0	0	0.1	0	0	0	0	0	0	0	0	0	0	0.4	0	0.6	0.2	interleukin 12 receptor, beta 2	3595	protein_coding
ENSG00000142864	SERBP1			0					0				0		0	8.13631	3.7	5	15.8	0	0	0	0.1	0	0	0	0	0.2	0.2	0	0	0	0	0	0	0	0.2	0	0	0.6	0	0.5	SERPINE1 mRNA binding protein 1	26135	protein_coding
ENSG00000116717	GADD45A			0					0				0		0	4.61441	5.1	3.3	5.4	0	0.4	0.9	0	0	0	0.5	0.5	0	0.2	0	0	0	0	0	0	0	0.2	0	0.4	0	0	0.5	growth arrest and DNA-damage-inducible, alpha	1647	protein_coding
ENSG00000172380	GNG12			0					0				0		0	8.18807	6.1	9.5	9	0	0	0	0	0	0.1	1.7	0	0	0	0	0	0	1.7	0	0	0	0	0	0	0.3	0	0	guanine nucleotide binding protein (G protein), gamma 12	55970	protein_coding
ENSG00000162595	DIRAS3			0					0				0		0	3.47043	4.3	4.5	1.6	0	0	0	0	0	0	0	0.2	0	0	0	0	0	0	0	0	0	0.3	0	0	0.9	0.6	0	DIRAS family, GTP-binding RAS-like 3	9077	protein_coding
ENSG00000116729	WLS			0					0				0		0	130.07	117.8	145.3	127.2	3.6	3.9	0.5	7.6	0.3	1.2	1.3	1.8	0.4	1.5	1.8	0.2	0.3	0.3	0	0.3	0	21.8	0	15.1	6	0.3	0.5	wntless Wnt ligand secretion mediator	79971	protein_coding
ENSG00000116745	RPE65			0					0				0		0	0	0	0	0	0	0	0	0	0	0	0	0	0	0	0	0	0	0	0	0	0	0.3	0.5	0.4	0.6	0.3	0.2	retinal pigment epithelium-specific protein 65kDa	6121	protein_coding
ENSG00000024526	DEPDC1			0					0				0		0	24.4661	30.9	25.6	16.9	0	0	0	0.1	1.3	0	0.2	0	0	0.9	0.2	0.2	0	0.1	0	0.4	0	2.6	0	3.2	0.9	0.3	0.2	DEP domain containing 1	55635	protein_coding
ENSG00000033122	LRRC7			0					0			282.2	5		0	23.0982	30.9	22.1	16.3	0.6	1.5	0	0	0.9	0	0	0	0	0.3	0	0	0	0	0	0	0	20.7	0.3	8.1	1354	22.1	6.2	leucine rich repeat containing 7	57554	protein_coding
ENSG00000066557	LRRC40			0					0			6.6	2		0	19.0531	23	17.3	16.9	0	4.3	0	0.1	0	0.2	0.1	0.2	1.5	0.3	0.1	0	0	0	0.1	0.4	0	3	0	5.8	0.6	7.3	4.3	leucine rich repeat containing 40	55631	protein_coding
ENSG00000116754	SRSF11			0					0				0		0	98.8007	93.8	90.7	112	1.5	2.5	0	0.8	0.1	0.3	0.3	1.6	1.4	3.2	1.5	0.1	0.4	0.2	0.2	0.8	0.1	2.6	0	1.1	4.2	2.1	1.4	serine/arginine-rich splicing factor 11	9295	protein_coding
ENSG00000118454	ANKRD13C			0					0			14.7	6		0	21.6898	34.4	24.4	6.3	0	0	0	0.2	1.8	0	1.1	0	0	0	0.2	0	0	0	0	0	0	22.6	23.3	5.8	6.3	9.7	20.4	ankyrin repeat domain 13C	81573	protein_coding
ENSG00000197568	HHLA3			0					0			282.4	4		0	2.84063	1.8	0.7	6	0	0	0	0	0	0	0.1	0	0	0	0	0	0	0	0	0.4	0	13.7	2	0.4	1071.6	42.1	0.2	HERV-H LTR-associating 3	11147	protein_coding
ENSG00000116761	CTH			0					0				0		0	58.1673	61	60.8	52.7	0	0.9	0	0.1	0.7	0	0.4	0	2.1	0	2.8	0.1	0.1	0	0	0.2	0	0.5	0	1.8	1.5	0.6	0	cystathionase (cystathionine gamma-lyase)	1491	protein_coding
ENSG00000050628	PTGER3			0					0			238.2	6		0	17.6865	16.7	19	17.4	0.1	0	0	0.7	0	0	0.1	0	0.4	0.3	0.9	0.1	0	0	0	0.1	0	42.8	65.7	374	17.6	802.2	127.2	prostaglandin E receptor 3 (subtype EP3)	5733	protein_coding
ENSG00000132485	ZRANB2			0					0				0		0	181.024	157.4	144.3	241.4	0.3	0.1	0.6	1.3	1.4	0.5	2.7	5.9	3	1.9	1.2	0.5	0.3	1.6	0.1	2.3	0	8.6	27.6	33.6	4.5	5.1	5.5	zinc finger, RAN-binding domain containing 2	9406	protein_coding
ENSG00000172260	NEGR1			0					0				0		0	9.57833	11.6	7.4	9.8	0	0	0	0.1	0	0	0	0	0	2	0	0	0	0	0	0	0	0	0	0	0.6	0	0	neuronal growth regulator 1	257194	protein_coding
ENSG00000162620	LRRIQ3			0					0			184.5	2		0	165.601	151.5	149	196.2	2	2.2	0.8	0	2.1	0.9	2.3	14.7	8.3	3.6	4	0.9	0.6	0.5	0	0.8	0	36.2	280.5	88.5	10.2	13.9	26	leucine-rich repeats and IQ motif containing 3	127255	protein_coding
ENSG00000254685	FPGT			0					0				0		0	66.2069	88.3	65.5	44.8	0.1	0	0	0	1.3	0	1.9	6.1	2.9	0	0	0.1	0	0.3	0	0	0.1	1.2	1.5	0.7	0.9	0	2.2	fucose-1-phosphate guanylyltransferase	8790	protein_coding
ENSG00000259030	FPGT-TNNI3K			0					0				0		0	0	0	0	0	0	0	0	0	0	0	0	0	0	0	0	0	0	0	0	0	0	0.2	0	0	0	0	0	FPGT-TNNI3K readthrough	51086	protein_coding
ENSG00000116783	TNNI3K			0					0				0		0	1.01748	0.6	1.9	0.5	0	0	0	0	0	0	0	0	0	0	0	0	0	0	0	0	0	0	0	0.5	0	0	0	TNNI3 interacting kinase	51086	protein_coding
ENSG00000162621	LRRC53			0					0				0		0	0	0	0	0	0	0	0	0	0	0	0	0	0	0	0	0	0	0	0	0	0	0.5	0	0	0.9	0.6	0.2	leucine rich repeat containing 53	NA	protein_coding
ENSG00000178965	C1orf173			0					0				0		0	113.82	154.2	119.6	67.7	1.6	0	0	0.1	0	0.1	1.4	0.5	0.5	5.3	1.1	0.3	0	1	0.2	0.1	0.1	0.8	1	5.3	2.1	6.7	0.7	chromosome 1 open reading frame 173	127254	protein_coding
ENSG00000116791	CRYZ			0					0			152.5	2		0	238.252	281.9	268.4	164.4	3.2	7.9	1.2	6	1.2	0.6	1.7	1.3	3.7	5.3	5	0.2	0.1	3.4	0.4	0.3	0.2	82.3	222.7	52.6	6.6	42.7	2.2	crystallin, zeta (quinone reductase)	1429	protein_coding
ENSG00000162623	TYW3			0					0				0		0	35.9074	45.6	38	24.2	0	1	0.8	0	0.7	0.3	1.4	0	0	1.9	1	0	0.1	0.3	0	0.4	0	0.3	2.3	3.7	2.7	5.1	1.2	tRNA-yW synthesizing protein 3 homolog (S. cerevisiae)	127253	protein_coding
ENSG00000162624	LHX8			0					0				0		0	0.135591	0.4	0	0	0	0.5	0	0	0	0	0	0	0	0	0	0	0	0	0	0	0	0.3	0	0	0	0	0.2	LIM homeobox 8	431707	protein_coding
ENSG00000137968	SLC44A5			0					0				0		0	92.6965	137.5	59.3	81.3	0	0	0	0.6	0.6	0	0.1	0.7	3.5	0	10	0.1	0	0	0.3	0.2	0.3	2.6	0	0.9	0.6	0	1.7	solute carrier family 44, member 5	204962	protein_coding
ENSG00000117054	ACADM			0					0			618.3	5		0	292.239	357.8	282	237	3.5	20	1.8	1.9	1.8	1.4	6.4	12.4	5	2.6	4.4	0.5	0.3	0.6	0.1	0.4	0.1	960.4	1676.3	145	85.5	224.3	27.2	acyl-CoA dehydrogenase, C-4 to C-12 straight chain	34	protein_coding
ENSG00000137955	RABGGTB			0					0			118.8	2		0	300.716	372.8	356.5	172.9	3.6	8.9	0	2.3	4.9	1.2	4	4.6	5.9	5.8	4.8	2.3	0	0.4	0.1	0.9	0	21.7	2.5	1.2	6.9	135.6	101.9	Rab geranylgeranyltransferase, beta subunit	5876	protein_coding
ENSG00000154007	ASB17			0					0				0		0	1239.44	1617.1	1110.5	990.7	5.1	54.8	2.7	5.8	8.8	7.5	17.6	15.8	22.5	9	17.6	3.1	0.6	5.1	0.5	5.6	0.1	193.2	43.9	6.4	23.6	3	9.9	ankyrin repeat and SOCS box containing 17	127247	protein_coding
ENSG00000117069	ST6GALNAC5			0					0			80.5	3		0	9.83824	9.6	10.4	9.5	0	0	0.2	0	0.5	0	0	1	0.2	1	0.2	0	0	0.6	0	0.1	0	80.3	0	0	151.8	9.4	0	ST6 (alpha-N-acetyl-neuraminyl-2,3-beta-galactosyl-1,3)-N-acetylgalactosaminide alpha-2,6-sialyltransferase 5	81849	protein_coding
ENSG00000142892	PIGK			0					0				0		0	381.323	394.4	385.7	363.9	1.8	5.4	0.5	1.2	2	0.3	2.9	3.1	4	6.3	2.6	0.2	1.4	0.4	0.2	1.9	0.1	5	1.5	3.9	60.7	17	1.4	phosphatidylinositol glycan anchor biosynthesis, class K	10026	protein_coding
ENSG00000154027	AK5			0					0			2.4	3		0	6.06018	6.7	7.1	4.3	0	0	0	0	0	0	0.1	0	0.2	0.5	0.2	0.1	0	0	0	0	0	0.7	2.3	0.7	0	2.7	2.2	adenylate kinase 5	26289	protein_coding
ENSG00000036549	ZZZ3			0					0				0		0	56.8248	82.6	46	41.9	0.1	0	0	0	0.3	0	0.7	0.5	1.3	4.4	0.5	0	0	0.1	0	0	0	0.5	0	1.2	1.8	1.2	0.5	zinc finger, ZZ-type containing 3	26009	protein_coding
ENSG00000077254	USP33			0					0				0		0	98.9916	88.5	115.8	92.7	0.1	0	0	0	0.1	0.8	13.5	1.6	0.2	1.7	0.5	0.9	0.7	0	0.1	0	0	1.5	1	0.9	19.7	1.5	0.5	ubiquitin specific peptidase 33	23032	protein_coding
ENSG00000180488	FAM73A			0					0				0		0	59.589	62.8	66.5	49.5	0	0	0	0.1	0	0	2.1	2.1	0	0	1.2	0	0.3	0.5	0	0	0.2	0	0.5	0.4	0.3	0.3	0	family with sequence similarity 73, member A	374986	protein_coding
ENSG00000162614	NEXN			0					0			831.9	2		0	167.569	183.7	151.9	167.2	0	3.4	0.8	2.1	1.9	0.3	3.6	4.3	1.7	2.2	6.8	0.3	0	0	0	0.4	0.2	982.7	7.1	681	3.3	18.2	12.7	nexilin (F actin binding protein)	91624	protein_coding
ENSG00000162613	FUBP1			0					0			26.4	1		0	33.7131	27.5	37.3	36.4	0	0.1	0.6	0	0	0	0.3	0	0.3	3.9	0.6	0	0.4	0.6	0	0.3	0	2.6	0.3	26.4	1.5	2.1	1.2	far upstream element (FUSE) binding protein 1	8880	protein_coding
ENSG00000162616	DNAJB4			0					0			52.7	3		0	70.9788	75.5	73.3	64.1	1.2	3.2	0	0.1	0.1	0.3	0.8	0.5	0.2	2.4	2.5	0.2	0.1	0.1	0	0	0	33.1	59.9	7.6	5.4	65.1	9.4	DnaJ (Hsp40) homolog, subfamily B, member 4	11080	protein_coding
ENSG00000137960	GIPC2			0					0				0		0	23.5425	28.1	21.4	21.2	0	0	0	0.2	0	0.1	0	0	0	0	0	0.2	0.4	0	0	0	0	0	0.3	0.5	0.9	1.2	0	GIPC PDZ domain containing family, member 2	54810	protein_coding
ENSG00000122420	PTGFR			0					0				0		0	0.50852	0.8	0.7	0	0	0	0	0	0	0	0	0	0	0	0	0	0	0	0	0	0	0	0.3	0	0	0	0.2	prostaglandin F receptor (FP)	5737	protein_coding
ENSG00000137959	IFI44L			0					0			468.5	1		0	430.347	386.2	394.9	509.9	4.1	3.6	0	1.4	2.8	1.8	6	1.3	4.7	3.9	2.1	2.4	1.6	0.9	0.3	2.7	0.2	468.5	90.5	51.4	6.6	2.4	2.2	interferon-induced protein 44-like	10964	protein_coding
ENSG00000137965	IFI44			0					0				0		0	493.838	569.9	553.9	357.7	2.7	6.6	1.5	5.5	2.8	2.9	8.2	12.5	4.9	7.5	23.3	5.2	1	1.2	0	1.1	0.1	8.6	0.5	8	9.6	4.2	3.4	interferon-induced protein 44	10561	protein_coding
ENSG00000162618	ELTD1			0					0				0		0	258.052	253.4	209.8	310.9	1.1	3.4	0.2	0.4	0.1	0.3	0.2	3.1	2.4	1	1	0.6	0	0.1	0.4	0.4	0.4	1.2	0	4.8	6.3	23.6	21.6	EGF, latrophilin and seven transmembrane domain containing 1	64123	protein_coding
ENSG00000117114	LPHN2			0					0			36.5	1		0	109.407	109	115.1	104.1	1.4	6.3	0	1.3	0.8	0.9	3	4	0.4	2.9	2.4	0	0.6	1.1	0	0.4	0	1.7	1	3.4	1.2	2.1	36.5	latrophilin 2	23266	protein_coding
ENSG00000137941	TTLL7			0					0				0		0	195.518	226.4	188.7	171.5	0	4.6	0	0	0.3	1.4	1	0.2	1.1	0.5	0.5	0.1	0	0.2	0.2	0.7	0.2	25.5	1.5	2.7	5.4	2.4	3.8	tubulin tyrosine ligase-like family, member 7	79739	protein_coding
ENSG00000142875	PRKACB			0					0				0		0	174.269	180.6	160.9	181.3	0.7	0	0	0.2	0	1	0.3	1.8	1.4	1.9	2.2	0.5	0.4	0.3	0	0.4	0.3	0.3	0.8	8.7	0	0.6	1.9	protein kinase, cAMP-dependent, catalytic, beta	5567	protein_coding
ENSG00000203943	SAMD13			0					0			3.4	2		0	10.3128	11	10.4	9.5	0	0.4	0	0	0.1	0.2	0	0.7	0	0	0	0	0	0	0.1	0	0	1.8	0	3.2	0.3	3.6	0	sterile alpha motif domain containing 13	148418	protein_coding
ENSG00000137976	DNASE2B			0					0				0		0	113.692	127.1	104.4	109.5	0	0.3	0	0	0	0.2	0	1.3	0	0	1.2	0	0	0	0	0	0	0.2	0.5	0.5	0	0	2.6	deoxyribonuclease II beta	58511	protein_coding
ENSG00000117133	RPF1			0					0			92.4	1		0	220.63	232.7	241.1	188.1	1.1	18.4	0.5	1.8	0.6	1.3	3.6	9.7	4	6.6	3.6	0.6	0	1.3	0	1.3	0	92.4	2.5	2.7	51.7	2.7	13.9	ribosome production factor 1 homolog (S. cerevisiae)	80135	protein_coding
ENSG00000174021	GNG5			0					0				0		0	39.6981	25	31.6	62.5	0	0.4	0.2	0	0	0	0	1.3	0.2	0.5	1.2	0	0	0.3	0.1	0.2	0	0.3	3.3	1.2	0	0.9	1.9	guanine nucleotide binding protein (G protein), gamma 5	2787	protein_coding
ENSG00000117151	CTBS			0					0			154.2	1		0	82.5738	118.8	94.7	34.2	0.8	0	0	0.1	0.3	0.9	0	3.5	0.7	3.7	7.5	0.2	0.1	0.3	0	0.3	0	4.5	154.2	1.1	4.2	8.5	1.2	chitobiase, di-N-acetyl-	1486	protein_coding
ENSG00000180869	C1orf180			0					0				0		0	0	0	0	0	0	0	0	0	0	0	0	0	0	0	0	0	0	0	0	0	0	0	0	0	0	0	0	chromosome 1 open reading frame 180	NA	protein_coding
ENSG00000117155	SSX2IP			0					0			209.5	1		0	409.258	469.2	441.9	316.6	2.2	8.1	0.2	1	4.9	0.6	7.4	7.4	6.8	1	3.8	1.4	0.9	3.5	0.2	2.3	0.4	15.4	0.8	2.7	22.4	209.5	1.9	synovial sarcoma, X breakpoint 2 interacting protein	117178	protein_coding
ENSG00000171517	LPAR3			0					0				0		0	0.903977	2.2	0.5	0	0	0	0	0	0	0	0	0	0	0	0	0	0	0	0	0	0	0.2	0	0	0	0	0.5	lysophosphatidic acid receptor 3	23566	protein_coding
ENSG00000153898	MCOLN2			0					0				0		0	11.5082	13.8	14.7	6	0	0.6	0	0	0	0.5	0	0	0	0	0	0	0	0	0	0	0	0.3	0	0	0.3	0	0	mucolipin 2	255231	protein_coding
ENSG00000162643	WDR63			0					0			171.6	3		0	235.369	270.7	222.9	212.5	0.6	4.5	0.6	0.9	0	0.3	0.3	6.3	1.8	0.5	4.1	0.7	1.4	1	0.4	1	0.1	169.9	84.7	3.9	40.6	3.3	260.3	WD repeat domain 63	126820	protein_coding
ENSG00000055732	MCOLN3			0					0				0		0	23.6763	27.9	24.7	18.5	1.5	0.8	0	0.5	0	0.4	0.2	1.3	1.1	0.9	0	0	0	0.2	0	0.1	0	3.1	0.5	3	2.4	0.3	0.2	mucolipin 3	55283	protein_coding
ENSG00000097096	SYDE2			0					0			1.5	2		0	0	0	0	0	0	0	0	0	0	0	0	0	0	0	0	0	0	0	0	0	0	0.3	0.3	0.2	0.9	1.5	1.4	synapse defective 1, Rho GTPase, homolog 2 (C. elegans)	84144	protein_coding
ENSG00000162642	C1orf52			0					0			29.6	1		0	6.70046	3.3	1.9	14.9	0	0.1	0.2	0.1	0.1	0	0.1	1	0	0	0	0	0	0.1	0	0.1	0	29.6	0.3	0.7	0	0	1	chromosome 1 open reading frame 52	148423	protein_coding
ENSG00000142867	BCL10			0					0				0		0	1.85572	2	0	3.5	0	0	0	0	0	0	0	0	0	0	0	0	0	0	0	0	0	0	0.3	0	0.3	0	0.2	B-cell CLL/lymphoma 10	8915	protein_coding
ENSG00000153904	DDAH1			0					0				0		0	5.38334	4.5	5.7	6	0	0	0	0	0	0	0	0	0	0	0.1	0	0	0	0	0	0	0	0	0	0	0	0	dimethylarginine dimethylaminohydrolase 1	23576	protein_coding
ENSG00000142871	CYR61			0					0			814.6	4		0	202.836	145.8	207.2	255.5	0.3	3.2	2.1	1.6	0.5	0.5	0.9	6.8	2.5	2.9	3.3	1	1.7	0.6	0.4	0	0.1	51.7	3	15.2	860	1615	731.7	cysteine-rich, angiogenic inducer, 61	3491	protein_coding
ENSG00000117174	ZNHIT6			0					0			27.1	1		0	17.8986	24.8	14.5	14.4	0	0	0	0	0	0	0	0.3	0	0.2	0	0	0.1	0.3	0	0	0	3.6	0	27.1	2.1	0.6	1.2	zinc finger, HIT-type containing 6	54680	protein_coding
ENSG00000171502	COL24A1			0					0			3.8	6		0	5.75522	6.7	5.9	4.6	0	0.4	0	0.1	0	0	0	0	0.2	0	0.4	0	0	0	0	0	0	3.3	8.4	2.7	3	2.4	3.1	collagen, type XXIV, alpha 1	255631	protein_coding
ENSG00000122417	ODF2L			0					0				0		0	116.239	106.8	95.2	146.8	0.7	7.1	0	1.1	0.1	0.3	0.9	2.1	1.1	1.2	1.8	0.2	0.6	1.9	0	0.7	0	2.1	10.7	19.7	2.1	13.6	1.7	outer dense fiber of sperm tails 2-like	57489	protein_coding
ENSG00000137975	CLCA2			0					0				0		0	15.8483	11.2	13.5	22.8	0	0	0	0.3	0	3.6	0.1	0	0	0	0.1	0.1	0	0	0	0	0	0.2	0.3	0.5	0	0.6	0	chloride channel accessory 2	9635	protein_coding
ENSG00000016490	CLCA1			0					0			808.7	4		0	1.53954	0.8	0	3.8	0	0	0	0	0	0	0	0	0	0	0	0	0	0	0	0	0	30.9	2	3200.3	1.8	0.9	0.7	chloride channel accessory 1	1179	protein_coding
ENSG00000016602	CLCA4			0					0			218.7	3		0	23.999	23	21.8	27.2	0	0	0	0.4	0	0	0.5	0	0.2	0.3	1.1	0	0	0	0	0	0	10.9	6.8	0.7	0.6	638.4	1.2	chloride channel accessory 4	22802	protein_coding
ENSG00000097033	SH3GLB1			0					0			217.4	2		0	535.307	561.8	599.5	444.6	3	18.8	1.1	6.5	2.6	2.8	22.7	11.2	3.7	15.3	2.6	2.5	1.6	2.9	0.3	1.1	0.1	25.5	271.4	163.4	8.4	4.5	5.5	SH3-domain GRB2-like endophilin B1	51100	protein_coding
ENSG00000183291	2015-09-15			0					0				0		0	390.876	396.8	407.3	368.5	3.2	14.4	0.9	3.8	1.9	1.7	1.7	8.9	2.5	6	4.4	1.4	1	2.1	0.8	2.1	0.1	2.6	6.3	3.5	14	2.1	6.7	Homo sapiens 15 kDa selenoprotein (SEP15), transcript variant 2, mRNA.	9403	protein_coding
ENSG00000153936	HS2ST1			0					0				0		0	2.85983	3.5	4	1.1	0	0.1	0	0	0	0	0	0.2	0	0	0	0	0	0	0	0	0	0	0	0.2	0	0	1	heparan sulfate 2-O-sulfotransferase 1	9653	protein_coding
ENSG00000267561	RP5-1052I5.2			0					0				0		0	6.2659	5.5	5.7	7.6	0	0.1	0	0	0	0	0	0	0.1	0	0	0	0	0.3	0	0.2	0	0.2	0	0	0	0	0	Heparan sulfate 2-O-sulfotransferase 1	NA	protein_coding
ENSG00000143013	LMO4			0					0				0		0	0.701031	0.6	0.9	0.5	0	0	0	0	0	0	0	0	0	0	0	0	0	0	0	0	0	0	0	0	0	0	0	LIM domain only 4	8543	protein_coding
ENSG00000065243	PKN2			0					0				0		0	32.6146	54.1	24.4	19.3	0	1	0	0.2	0.2	0	0	0	0.2	0.7	0	0.1	0	0	0	0	0	0.5	0.5	0.4	1.2	0	3.1	protein kinase N2	5586	protein_coding
ENSG00000137947	GTF2B			0					0			308.5	1		0	270.603	284.9	270.6	256.3	0	7.2	0.2	0.3	0.9	1.8	4	2.6	10.1	3.9	3.5	0.9	0.6	4.8	0.9	0.7	0.4	57.7	0.3	2.8	5.4	308.5	8.7	general transcription factor IIB	2959	protein_coding
ENSG00000137944	CCBL2			0					0				0		0	468.493	616.3	468.5	320.7	10.9	4.3	0.8	4.9	4.2	3.4	10.1	10.1	1.3	7.3	3.4	1.3	0.7	2.7	0.2	1.4	0.5	18	0.5	2.1	4.2	0.3	1	cysteine conjugate-beta lyase 2	56267	protein_coding
ENSG00000213516	RBMXL1			0					0			27.6	1		0	33.1249	29.1	34.4	35.9	0.1	1.9	0	0.1	0.1	0	1	0.5	0.3	0.9	0	0	0	0.1	0.1	0	0	3	3	27.6	6.3	0	1	RNA binding motif protein, X-linked-like 1	494115	protein_coding
ENSG00000117226	GBP3			0					0			253.9	2		0	68.3993	60.6	52.5	92.1	0.3	1.9	0.2	0.3	0.4	0.1	0.9	2.6	0.8	0.2	1.4	0.2	0.1	0.2	0	0	0.1	27.8	16	480	2.4	0	2.2	guanylate binding protein 3	2635	protein_coding
ENSG00000117228	GBP1			0					0			17.9	1		0	63.0812	54.7	69.3	65.2	0.2	0.5	0.3	0.9	0.1	0	0.3	0.5	0.3	0.5	1.3	0	0.1	0.3	0	0.2	0.2	5.1	7.4	17.9	1.5	0.6	0.5	guanylate binding protein 1, interferon-inducible	2633	protein_coding
ENSG00000162645	GBP2			0					0			203.3	2		0	483.216	476.5	488	485.1	2.8	11.3	2.9	1.3	2.5	0.7	2.3	9.4	3	6	4.3	1.7	1.4	1.4	0.3	2.2	0	109.9	241.4	165.2	15.2	4.8	2.6	guanylate binding protein 2, interferon-inducible	2634	protein_coding
ENSG00000213512	GBP7			0					0			2.8	1		0	0.339586	0.2	0	0.8	0	0	0	0	0	0	0	0	0	0	0	0	0	0	0	0	0	1	2.8	0.7	0.6	0	0	guanylate binding protein 7	388646	protein_coding
ENSG00000162654	GBP4			0					0			12.5	3		0	6.6492	6.1	7.6	6.3	0	0	0	0	0	0	0	0.5	0	0.5	0	0	0	0.3	0	0	0	2.5	30.2	4.8	0.3	0.3	0	guanylate binding protein 4	115361	protein_coding
ENSG00000154451	GBP5			0					0			89.2	2		0	63.1414	48.8	70.5	70.1	0.2	0	0.2	1.8	0.1	0.2	0	1	0.1	2.7	0	0.1	0.1	0.6	0.1	0.4	0.1	156.7	8.6	21.8	2.7	0.9	9.4	guanylate binding protein 5	115362	protein_coding
ENSG00000183347	GBP6			0					0				0		0	0	0	0	0	0	0	0	0	0	0	0	0	0	0	0	0	0	0	0	0	0	0	0	0	0	0	0.2	guanylate binding protein family, member 6	163351	protein_coding
ENSG00000197147	LRRC8B			0					0				0		0	11.9736	16.5	10.2	9.2	0	0	0	0	0	0	0	0	0	0	0.4	0	0	0	0	0.3	0	0	0	0	0.3	0	0	leucine rich repeat containing 8 family, member B	23507	protein_coding
ENSG00000171488	LRRC8C			0					0				0		0	80.7042	78.1	107.8	56.3	0	0.8	0.2	0.2	0.5	0	0.2	1	0	1	0.7	0.1	0	0.7	0	0	0	1.7	0.5	1.6	0	0	0.2	leucine rich repeat containing 8 family, member C	84230	protein_coding
ENSG00000271949	RP11-302M6.4			0					0				0		0	0	0	0	0	0	0	0	0	0	0	0	0	0	0	0	0	0	0	0	0	0	0	0	0	0.3	0	0	Uncharacterized protein	NA	protein_coding
ENSG00000171492	LRRC8D			0					0			144.8	3		0	403.373	374.4	389.9	445.7	0.3	6.6	0.2	0.1	0.8	0.6	0.9	0	4.9	4.1	4.1	2.2	1.2	0.3	0.3	1	0.3	165.6	8.1	73.8	28.4	158.3	110.3	leucine rich repeat containing 8 family, member D	55144	protein_coding
ENSG00000143032	BARHL2			0					0				0		0	0	0	0	0	0	0	0	0	0	0	0	0	0	0	0	0	0	0	0	0	0	0.5	0.5	0	0.6	0.3	0	BarH-like homeobox 2	343472	protein_coding
ENSG00000122482	ZNF644			0					0			49.6	1		0	120.123	144	121.5	94.9	0	0.8	0	0	0	0.1	8.8	0.7	0.7	0.5	1	0.5	0	0.9	0	0.5	0.2	2.3	0.3	4.1	19.1	49.6	6.5	zinc finger protein 644	84146	protein_coding
ENSG00000097046	CDC7			0					0				0		0	52.477	71.2	57.4	28.8	0.6	0.3	0	0	0	0	11.8	0	0.8	0.3	2.5	0	0	0.2	0	0	0	0.5	0	0.9	0.3	0	1.2	cell division cycle 7	8317	protein_coding
ENSG00000069702	TGFBR3			0					0				0		0	16.48	9.8	18.7	20.9	0	0	0	0	0	0	0	0	0.1	0	0	0	0	0	0	0	0	0.2	0	0	0.3	0	0.2	transforming growth factor, beta receptor III	7049	protein_coding
ENSG00000137948	BRDT			0					0				0		0	585.662	668.9	572.5	515.6	1.6	4.6	2	2	8.2	0.6	8.2	15.8	3.7	6	11.8	1.2	0.4	1.6	0.6	1.8	0.2	50.4	1.5	35.4	19.1	2.7	6	bromodomain, testis-specific	676	protein_coding
ENSG00000172031	EPHX4			0					0			37.9	2		0	44.0019	46.6	40.6	44.8	0.3	0.5	0.3	0	0	0.5	0.2	0	0.9	0.5	1.3	0	0	0	0	0	0	1.7	0.5	0.2	62.2	13.6	0.2	epoxide hydrolase 4	253152	protein_coding
ENSG00000189195	BTBD8			0					0			5.4	1		0	2.85895	5.5	3.1	0	0	0	0	0	0	0	0	0	0	0	0	0	0	0.2	0	0	0	0.3	0	0.2	5.4	0	0.2	BTB (POZ) domain containing 8	284697	protein_coding
ENSG00000069712	KIAA1107			0					0				0		0	92.0572	115.7	57.4	103	1.5	0.5	0.3	0.9	0.2	0.1	1.9	3.8	0.9	0.3	1.8	0.1	0.4	1.3	0.1	0	0	2.1	0	1.6	8.4	0.6	1.7	KIAA1107	23285	protein_coding
ENSG00000174842	GLMN			0					0				0		0	87.308	98.8	99.2	63.9	0.2	5.4	0	0.7	0.2	0.3	0.7	3.3	0.7	0.5	0.3	0.1	0	0.3	0	0	0	1	17	8	6.6	1.5	1.9	glomulin, FKBP associated protein	11146	protein_coding
ENSG00000122484	RPAP2			0					0				0		0	110.614	106.4	124.4	101.1	0.1	0	0.3	0	0	1.3	2.5	0.3	0	1.2	2.2	1.6	2.7	0.4	0.1	1.2	0	0.2	1	0	6.6	0.3	0.2	RNA polymerase II associated protein 2	79871	protein_coding
ENSG00000162676	GFI1			0					0				0		0	0	0	0	0	0	0	0	0	0	0	0	0	0	0	0	0	0	0	0	0	0	0	0	0	0.3	0.3	0	growth factor independent 1 transcription repressor	2672	protein_coding
ENSG00000122406	RPL5			0					0				0		0	635.052	512.5	657.4	735.2	1.5	10.7	0.9	5.5	2.8	3.4	2.8	14	5.1	14.3	14.2	3.5	2.7	4.2	0.8	4.1	0.5	126	35	58.4	34.4	4.8	10.3	ribosomal protein L5	6083	protein_coding
ENSG00000154511	FAM69A			0					0				0		0	63.5967	84.2	44.6	62	0	0.5	0	0	0	0	2.9	1.2	0.3	0.5	0.8	0	0	0	0	0	0	4.6	0.8	5.7	3	0.3	1	family with sequence similarity 69, member A	388650	protein_coding
ENSG00000143033	MTF2			0					0				0		0	62.1046	69.8	56.5	60.1	0.5	0.4	0	0.3	0.4	3.9	0.3	4.8	2.8	2.4	0.1	0.3	0	0	0	0.3	0	0.3	7.6	0.5	2.1	0.3	0.7	metal response element binding transcription factor 2	22823	protein_coding
ENSG00000117500	TMED5			0					0			246.6	1		0	56.3335	68.5	51.3	49.2	0.2	1.3	0.5	0.2	0.4	0.3	0	1.6	2.3	0.5	0.3	0.1	0	0.3	0.1	0	0	8.9	1.8	6.4	3	0.6	246.6	transmembrane emp24 protein transport domain containing 5	50999	protein_coding
ENSG00000122483	CCDC18			0					0				0		0	36.9211	44.7	30.1	35.9	0	1	0	0	0.5	0.1	0	0	0	0.5	3	0.1	0	0.1	0	0	0	2.1	1	0.7	3.9	0.6	2.2	coiled-coil domain containing 18	343099	protein_coding
ENSG00000117505	DR1			0					0				0		0	102.574	112.9	82.6	112.2	0.8	4.6	0.3	0.9	0.3	0	0.2	2.6	0.7	2.7	0.1	0.8	0	0.1	0	0.1	0.1	0.3	1	0.9	0	0.3	0.5	down-regulator of transcription 1, TBP-binding (negative cofactor 2)	1810	protein_coding
ENSG00000137942	FNBP1L			0					0				0		0	19.651	16.1	28.5	14.4	0	1	0.2	0.1	0	0.5	0	0.5	0.1	0.2	0.3	0	0	0	0	0.1	0	1.7	0	0	0	0	0.5	formin binding protein 1-like	54874	protein_coding
ENSG00000137936	BCAR3			0					0			362.7	4		0	67.6321	50.8	75.9	76.1	0.1	0.8	0.2	1.2	0.1	0	0	1.2	0.2	2.9	0	0.2	0.3	0	0	0	0.4	502.5	1.3	646.7	281.5	20.3	3.4	breast cancer anti-estrogen resistance 3	8412	protein_coding
ENSG00000067334	DNTTIP2			0					0				0		0	680.995	938.2	638.9	465.8	1.6	45.5	2.6	6.8	4.2	2.4	10.9	21.3	5.4	2.9	46.2	2.7	0.7	2.5	0.6	2.3	0.2	54.1	3.8	23.4	19.7	10.6	2.9	deoxynucleotidyltransferase, terminal, interacting protein 2	30836	protein_coding
ENSG00000023909	GCLM			0					0			61.5	2		0	74.0861	92.7	64.6	65	0.6	2.1	0.3	1.1	1.1	0	0.8	0.8	0.2	3.2	3.3	0.1	0.7	0	0	0.1	0	85	38	12.4	2.1	0.6	13.5	glutamate-cysteine ligase, modifier subunit	2730	protein_coding
ENSG00000198691	ABCA4			0					0			5.6	1		0	4.59071	2.6	7.6	3.5	0	0	0	0.1	0	0	0.1	0	0	0	0	0	0	0	0	0	0	5.6	1	0.4	0	0.6	1	ATP-binding cassette, sub-family A (ABC1), member 4	24	protein_coding
ENSG00000137962	ARHGAP29			0					0			163.2	1		0	85.0776	86.4	78.6	90.2	0	0	0	0.9	0.4	0	0.9	0.5	0	0	1.1	1.2	0	0.2	0	0.1	0	3.6	0.3	1.4	3.6	5.4	163.2	Rho GTPase activating protein 29	9411	protein_coding
ENSG00000117528	ABCD3			0					0				0		0	32.3642	31.9	34.2	31	0.2	0.3	1.1	0.1	0	0.3	0.1	0.2	1.3	0.2	0.7	0.1	0.1	0	0	0	0	3.6	0.5	0.4	0.9	0.6	2.6	ATP-binding cassette, sub-family D (ALD), member 3	5825	protein_coding
ENSG00000117525	F3			0					0				0		0	0.564999	1.2	0.5	0	0	0	0	0	0	0	0	0	0	0	0	0	0	0	0	0	0	0	0	0	0	0	0	coagulation factor III (thromboplastin, tissue factor)	2152	protein_coding
ENSG00000143036	SLC44A3			0					0			2664.3	2		0	349.44	315.9	378.3	354.1	3.9	20.1	1.5	3.5	2.8	2.5	8.2	9.7	10	7.5	3.4	2.3	0.3	0.6	0.6	0.3	0.1	76.2	2.5	1.8	8.1	4963.8	364.9	solute carrier family 44, member 3	126969	protein_coding
ENSG00000117519	CNN3			0					0				0		0	227.716	253.4	239.5	190.3	0.7	5.5	0.9	2.7	0.6	2.2	0.8	5.1	0.9	6	3	0.3	0.6	0.9	0.1	0.7	0.1	0.3	0.8	0.7	3.6	2.4	4.8	calponin 3, acidic	1266	protein_coding
ENSG00000172339	ALG14			0					0				0		0	217.156	212.9	192	246.5	0.5	5.3	0.3	0.9	0.6	0.2	2.6	1.5	0.4	5.3	0.4	1.7	1.7	3	0.2	0.4	0.2	2.6	0.3	2.5	7.8	8.8	6.5	ALG14, UDP-N-acetylglucosaminyltransferase subunit	199857	protein_coding
ENSG00000152078	TMEM56			0					0				0		0	2.2626	1.8	1.4	3.5	0	0	0	0	0	0	0	0	0	0	0	0	0	0	0	0	0	0	0	0	0	0	0	transmembrane protein 56	148534	protein_coding
ENSG00000271092	TMEM56-RWDD3			0					0				0		0	0.181194	0	0	0.5	0	0	0	0	0	0	0	0	0	0	0	0	0	0	0	0	0	0	0	0	0	0	0	TMEM56-RWDD3 readthrough	100527978	protein_coding
ENSG00000122481	RWDD3			0					0			27	3		0	73.1967	63.3	72.6	83.7	0.7	0	0	0.5	0.1	0.3	0	0.3	0	0.5	0.7	0.2	0.1	0	0	0.4	0	11.7	0.5	0	27.2	35.4	18.5	RWD domain containing 3	25950	protein_coding
ENSG00000237435	RP11-147C23.1			0					0			29.3	1		0	86.1254	113.1	90.7	54.6	0	7.4	0	0.1	1.8	0	1.7	1.6	0.1	0.5	0	0.2	0.1	1.1	0.3	0.1	0	1	0.8	0.2	1.2	0	29.3	Uncharacterized protein	NA	protein_coding
ENSG00000188641	DPYD			0					0			28.2	2		0	53.5548	47.4	47.2	66	0	0.4	0.8	1.2	0.4	0.1	0.9	1.5	0	1	0.1	0	0	0	0	0.1	0.2	12.6	0.8	2.8	39.7	3.3	16.6	dihydropyrimidine dehydrogenase	1806	protein_coding
ENSG00000162627	SNX7			0					0				0		0	111.242	114.5	107.5	111.7	0.1	2.6	0.9	0.6	0.1	0	1	0.5	2.3	3.2	1.9	1	0.1	0.3	0.2	1.3	0	17.5	1.8	22.5	7.2	0.3	1.2	sorting nexin 7	51375	protein_coding
ENSG00000117598	LPPR5			0					0				0		0	7.72815	3.9	5.5	13.9	0	0	0	0	0	0	0	0	0	0	0	0	0	1	0	0	0	0	0	0	0	0	0.2	Lipid phosphate phosphatase-related protein type 5	163404	protein_coding
ENSG00000117600	LPPR4			0					0				0		0	1.21066	1.2	0.2	2.2	0	0	0	0	0	0	0	0	0	0	0.1	0	0	0	0	0	0	0	0	0	0.3	0	0	Lipid phosphate phosphatase-related protein type 4	9890	protein_coding
ENSG00000099260	PALMD			0					0				0		0	235.697	260.5	219.1	227.5	1.1	0.9	0.2	0.1	2.4	1.2	3.9	4.6	0.9	3.6	2.2	0.2	1.2	0.3	0.2	0.1	0	2.6	0.5	28	3.9	2.4	0.5	palmdelphin	54873	protein_coding
ENSG00000156869	FRRS1			0					0				0		0	2.99802	0.8	3.6	4.6	0	0	0	0	0	0	0	0	0	0	0	0	0	0	0	0	0	0.3	0.5	0.4	0	0.3	0.5	ferric-chelate reductase 1	391059	protein_coding
ENSG00000162688	AGL			0					0				0		0	46.7702	44.1	52.7	43.5	0	1.7	0	0.3	0	0	0	1	0	0	0	0	0	0.6	0	0	0.1	1.7	0.5	1.2	3.6	0	1	amylo-alpha-1, 6-glucosidase, 4-alpha-glucanotransferase	178	protein_coding
ENSG00000117620	SLC35A3			0					0				0		0	18.1973	15.7	18.3	20.7	1.5	0	0	0.5	0.4	0	0.3	3.3	0	0.2	0	0	0	0	0.1	0.1	0	0.7	0	0.4	0.6	0	4.1	solute carrier family 35 (UDP-N-acetylglucosamine (UDP-GlcNAc) transporter), member A3	23443	protein_coding
ENSG00000156875	HIAT1			0					0			605.6	2		0	142.863	105.2	131	192.4	0.1	0.4	0	0.1	0.6	0	0.4	1.5	1.6	0.3	0.7	0.5	0.6	0.2	0.2	0.1	0.1	32.2	20.5	63.9	9	10.9	1147.3	hippocampus abundant transcript 1	64645	protein_coding
ENSG00000156876	SASS6			0					0				0		0	4.95554	4.1	2.4	8.4	0	0	0	0	0	0	0.1	0.2	0.1	0.9	0	0	0	0	0	0	0	0.5	0	0.2	0	0.3	0.2	spindle assembly 6 homolog (C. elegans)	163786	protein_coding
ENSG00000122435	TRMT13			0					0			111.4	1		0	63.9238	70.8	61.5	59.5	0.3	0.5	0.2	0.1	0.6	0	0	5.4	0.2	0.2	1.5	0	0.3	0	0	0	0	2.5	0.5	0.2	1.2	111.4	3.8	tRNA methyltransferase 13 homolog (S. cerevisiae)	54482	protein_coding
ENSG00000122477	LRRC39			0					0				0		0	44.8454	63.7	47.2	23.6	2.3	0.1	0	0.1	0.1	0	1	0.3	1.5	1.7	0.1	0.5	0	0.3	0	1	0	2.3	8.1	0.2	1.2	2.4	0.7	leucine rich repeat containing 39	127495	protein_coding
ENSG00000137992	DBT			0					0			2.2	3		0	1.93322	1.6	3.1	1.1	0	0	0	0	0	0	0	0	0	0	0	0	0	0	0	0	0	1.5	2.8	0.9	2.4	0.9	0.5	dihydrolipoamide branched chain transacylase E2	1629	protein_coding
ENSG00000137996	RTCA			0					0				0		0	284.083	368.1	272.9	211.2	2.2	9	0.2	7.8	0.2	0.3	1.9	8.9	1.7	1.9	7.2	0.2	0.4	1.8	0.1	0.6	0.1	1.5	5.3	46.6	9	1.2	19.2	RNA 3'-terminal phosphate cyclase	8634	protein_coding
ENSG00000079335	CDC14A			0					0			225.6	3		0	97.6157	95.8	99.2	97.8	0	1.2	0	0	0.1	0	0	0	0.3	0	1	0.5	0	0	0	0.2	0.3	138	0.3	0.5	502.3	36.3	0.2	cell division cycle 14A	8556	protein_coding
ENSG00000181656	GPR88			0					0			1.2	1		0	0	0	0	0	0	0	0	0	0	0	0	0	0	0	0	0	0	0	0	0	0	0.8	0	0	0	0.6	1.2	G protein-coupled receptor 88	54112	protein_coding
ENSG00000162692	VCAM1			0					0				0		0	264.627	343.5	217.2	233.2	0.7	9.5	0	0.4	2.3	3.3	4.8	4.3	1.7	3.2	11.3	0.1	0.3	0.5	0	0.7	0.1	0.7	0.3	1.6	3.3	4.2	8.4	vascular cell adhesion molecule 1	7412	protein_coding
ENSG00000162694	EXTL2			0					0				0		0	129.943	156.8	122.9	110.1	0	0	0	1.6	0.9	0	3.5	5.1	1.4	0	0	0.1	0.1	1	0.1	0	0	0.2	14.7	0.5	3	11.8	1.4	exostosin-like glycosyltransferase 2	2135	protein_coding
ENSG00000162695	SLC30A7			0					0				0		0	1.08716	0	0	3.3	0	0	0	0	0	0	0	0	0	0	0	0	0	0	0	0	0	0	0.3	0	0.6	0.6	0.2	solute carrier family 30 (zinc transporter), member 7	148867	protein_coding
ENSG00000117543	DPH5			0					0				0		0	359.585	329.7	331.3	417.7	0.3	2.8	0	0.1	0	2.9	3.8	1.2	0.7	0.2	2.3	0	0.4	0.3	0.1	0.3	0.1	1	5.3	0.2	4.5	4.5	2.2	diphthamide biosynthesis 5	51611	protein_coding
ENSG00000269175	AC093157.1			0					0				0		0	0.701366	1	0	1.1	0	0	0	0	0	0	0	0	0	0	0.1	0	0	0	0	0	0	0	0	0	0	0	0.2	Uncharacterized protein	NA	protein_coding
ENSG00000170989	S1PR1			0					0			2.6	2		0	1.50398	1	2.1	1.4	0	0	0	0	0	0	0	0	0	0	0	0	0	0	0	0	0	0.3	0	0	2.4	0.9	2.9	sphingosine-1-phosphate receptor 1	1901	protein_coding
ENSG00000118733	OLFM3			0					0				0		0	74.2599	86.8	65.3	70.7	0.2	0	0.6	0.5	0	0.3	0.9	0.2	0.7	0.5	2.5	0	0.6	0.1	0.1	0.4	0.2	2	0	2.3	0.3	0.9	1.2	olfactomedin 3	118427	protein_coding
ENSG00000060718	COL11A1			0					0			135.8	6		0	24.0136	31.5	24.2	16.3	0	0.4	0	0	0	0	0	0	0.2	0	1	0	0	0	0	0	0	444.6	21	41.6	17.3	49.9	240.1	collagen, type XI, alpha 1	1301	protein_coding
ENSG00000185946	RNPC3			0					0				0		0	24.9545	25.8	29.2	19.8	0	0	0	0.4	0	0	1.3	0	1.1	0	4.1	0	0.1	0.3	0	0	0	0.5	0.5	1.2	0.3	0.6	0.5	RNA-binding region (RNP1, RRM) containing 3	55599	protein_coding
ENSG00000240038	AMY2B			0					0				0		0	231.579	236.7	273.2	184.8	2	2.2	0.6	0.1	2.3	0.5	5.1	14	2.8	5.1	1.5	0.8	0.7	3	0.2	0.6	0.1	3.1	1.3	0.5	6	0.9	2.9	amylase, alpha 2B (pancreatic)	280	protein_coding
ENSG00000243480	AMY2A			0					0				0		0	22.3852	26.6	26.1	14.4	0.5	0.1	0	0.1	0.1	0.2	0.2	0.5	0.1	0.2	0.2	0	0.1	1.5	0	0	0	0	0	0	0.3	0.6	0	amylase, alpha 2A (pancreatic)	279	protein_coding
ENSG00000237763	AMY1A			0					0				0		0	28.6024	38	30.4	17.4	0	0	0	0.2	0.1	0.2	0.2	0.5	0	0	0.4	0	0	0.1	0	0.1	0	0.2	0	0	0	0	0	amylase, alpha 1A (salivary)	276	protein_coding
ENSG00000174876	AMY1B			0					0				0		0	264.111	310.2	280.8	201.4	2	2.6	0.2	0.4	1.1	0.9	5.2	8.1	1.8	3.4	5.4	0.2	0.6	2.6	0.1	0.4	0.2	3.5	1.3	3.4	4.5	2.1	1.2	amylase, alpha 1B (salivary)	276	protein_coding
ENSG00000187733	AMY1C			0					0				0		0	20.7344	30.1	18.5	13.6	0.1	0.1	0	0.1	0.3	0.1	0.7	0.2	0	0	0.4	0	0	0.1	0	0	0	0	0.3	0	0.6	0.3	0	amylase, alpha 1C (salivary)	276	protein_coding
ENSG00000198890	PRMT6			0					0				0		0	0	0	0	0	0	0	0	0	0	0	0	0	0	0	0	0	0	0	0	0	0	0.3	0	0	0	0	0	protein arginine methyltransferase 6	55170	protein_coding
ENSG00000162631	NTNG1			0					0				0		0	58.7599	47.6	53.4	75.3	0	0	0	0	0	0.8	0	0	0.3	0	0	0.1	0	1.1	0	0.2	0.1	10.2	0	0	0.9	0.6	0.2	netrin G1	22854	protein_coding
ENSG00000134215	VAV3			0					0				0		0	41.3723	48.4	42	33.7	0	0	0	0	0	0	0	0	0.2	0.2	0.2	0	0	0.3	0.1	0.2	0	0.5	0.5	1.2	0.9	0.3	0.2	vav 3 guanine nucleotide exchange factor	10451	protein_coding
ENSG00000085491	SLC25A24			0					0				0		0	31.6539	26.2	35.8	32.9	0	0.5	0.2	0.1	0.4	0	0	0.3	0	0.3	0	0	0	0	0.1	0	0	0.2	0	0.2	0.9	0.3	1.9	solute carrier family 25 (mitochondrial carrier; phosphate carrier), member 24	29957	protein_coding
ENSG00000196427	NBPF4			0					0				0		0	1.52694	1	1.7	1.9	0	0	0	0.3	0	0	0	0	0	0	0	0	0	0	0	0	0	0.2	0	0	0.6	0.6	0.2	neuroblastoma breakpoint family, member 4	148545	protein_coding
ENSG00000186086	NBPF6			0					0			1.5	1		0	2.27408	1.8	1.2	3.8	0	0	0	0	0	0.1	0	0	0	0	0	0	0	0	0	0	0	0.2	0	0	1.5	0.3	0	neuroblastoma breakpoint family, member 6	653149	protein_coding
ENSG00000162636	FAM102B			0					0				0		0	11.4996	12.6	12.1	9.8	0	1.5	0	0.1	0	0.1	0.3	0.2	0.8	0.2	0	0	0	0.3	0	0	0	0	0	0	0	0	0	family with sequence similarity 102, member B	284611	protein_coding
ENSG00000162639	HENMT1			0					0			121.5	1		0	393.565	288	386.6	506.1	0.9	2.3	0	0.5	5.6	0.3	2.2	5.3	14.2	0.5	0.8	0.7	0.4	1.7	0.6	0.2	0.3	3.5	121.5	0.4	2.4	26.9	1.7	HEN1 methyltransferase homolog 1 (Arabidopsis)	113802	protein_coding
ENSG00000134186	PRPF38B			0					0			143.9	2		0	49.17	65.5	30.4	51.6	1.5	0	0.3	0.6	0.6	0.2	0.5	1.2	0.7	0.7	0.6	0	0	0	0.1	0.2	0	270.9	1.3	1.1	1.5	4.2	16.8	pre-mRNA processing factor 38B	55119	protein_coding
ENSG00000143107	FNDC7			0					0				0		0	0	0	0	0	0	0	0	0	0	0	0	0	0	0	0	0	0	0	0	0	0	0	0.3	0.4	0.3	0.3	0	fibronectin type III domain containing 7	163479	protein_coding
ENSG00000116266	STXBP3			0					0			94.2	1		0	153.991	211.1	136.7	114.2	3.7	5	0.3	0.4	0.3	0.6	1.1	7.7	2.3	2	1.6	0.2	0.1	0.9	0.1	0.4	0	3.6	0.5	28.7	5.4	2.7	94.2	syntaxin binding protein 3	6814	protein_coding
ENSG00000162641	AKNAD1			0					0				0		0	18.9677	19.9	29.9	7.1	0	0	0	0	0	0	0	0	0.1	0	1.4	0	0	0	0	0	0	0.2	0.3	0.2	0.9	0.6	0.2	AKNA domain containing 1	254268	protein_coding
ENSG00000121957	GPSM2			0					0			94.2	1		0	157.705	189.6	145.5	138.1	0	20.4	0	1.4	1.9	0	0	1.6	7.7	0.9	5.2	0.2	0.1	0	0	0.3	0	13.1	27.1	24.3	4.8	5.8	94.2	G-protein signaling modulator 2	29899	protein_coding
ENSG00000121940	CLCC1			0					0			1.3	1		0	3.89967	4.9	5.5	1.4	0	0	0	0	0	0	0	0	0	0	0	0	0	0	0	0	0	1.3	0.3	0.2	0.3	0	0	chloride channel CLIC-like 1	23155	protein_coding
ENSG00000085433	WDR47			0					0			57.8	4		0	55.3408	53.1	62.7	50.3	0.8	0.1	0	0	0	0.3	0.5	0.3	0.8	1.7	0.1	0	0.1	0.1	0	0.1	0	8.4	1.3	48.7	15.2	75.4	91.8	WD repeat domain 47	22911	protein_coding
ENSG00000215717	TMEM167B			0					0				0		0	4.27803	1	2.8	9	0.1	0	0	0	0	0	0	0	0	0	0	0	0	0	0	0	0	0.2	0	0	0.6	0.9	0	transmembrane protein 167B	56900	protein_coding
ENSG00000179902	C1orf194			0					0			60.1	3		0	52.4489	49.4	56	51.9	0.6	11.5	0	1.6	0.3	0	0.3	2.8	0.2	6.8	1.9	1	0.1	0.3	0.3	0.1	0	8.1	1	4.1	21.2	85.7	73.6	chromosome 1 open reading frame 194	127003	protein_coding
ENSG00000116299	KIAA1324			0					0				0		0	39.8287	31.7	48.9	38.9	0	0	0	0.2	0	0.1	0	0	0	0	0	0	0.4	0	0	0	0	0.3	0	0	1.5	6.7	0.5	KIAA1324	57535	protein_coding
ENSG00000143126	CELSR2			0					0			1.3	2		0	0	0	0	0	0	0	0	0	0	0	0	0	0	0	0	0	0	0	0	0	0	0.3	1	0.9	0.6	0.6	1.7	cadherin, EGF LAG seven-pass G-type receptor 2	1952	protein_coding
ENSG00000134222	PSRC1			0					0				0		0	1.14236	0.4	1.7	1.4	0	0.1	0	0	0.1	0	0	0	0	0	0	0	0	0	0	0	0	0.3	0	0	0.3	0	0.5	proline/serine-rich coiled-coil 1	84722	protein_coding
ENSG00000221986	MYBPHL			0					0				0		0	0.327935	0	0.7	0.3	0	0	0	0	0	0	0	0	0	0	0.2	0	0	0	0	0	0	0.2	0	0	0	0	0	myosin binding protein H-like	343263	protein_coding
ENSG00000134243	SORT1			0					0				0		0	121.768	91.5	124.8	148.9	0	0	0.3	1	0	0	0.7	0	0.9	0.2	1	1.2	0.3	0.1	0.2	0.2	0	1.2	12.2	1.9	1.8	1.5	19.2	sortilin 1	6272	protein_coding
ENSG00000143106	PSMA5			0					0				0		0	503.231	332.3	558.2	619.1	2.2	9.9	3.5	4.1	10.7	0.9	3.5	8.9	6	17.4	1.1	2	7.1	4.9	0.5	3.3	0.2	9.1	2.3	5.3	29	5.1	6.5	proteasome (prosome, macropain) subunit, alpha type, 5	5686	protein_coding
ENSG00000143028	SYPL2			0					0				0		0	0	0	0	0	0	0	0	0	0	0	0	0	0	0	0	0	0	0	0	0	0	0	0.3	0	0	0	0	synaptophysin-like 2	284612	protein_coding
ENSG00000162650	ATXN7L2			0					0			9.1	1		0	0	0	0	0	0	0	0	0	0	0	0	0	0	0	0	0	0	0	0	0	0	1	9.1	0	0.3	0.3	0.2	ataxin 7-like 2	127002	protein_coding
ENSG00000174151	CYB561D1			0					0				0		0	0	0	0	0	0	0	0	0	0	0	0	0	0	0	0	0	0	0	0	0	0	0	0	0	0	0	0	cytochrome b561 family, member D1	284613	protein_coding
ENSG00000181754	AMIGO1			0					0				0		0	0.0677956	0.2	0	0	0	0	0	0	0	0	0	0	0	0	0	0	0	0	0	0	0	0.2	0	0.4	0	0.9	0.2	adhesion molecule with Ig-like domain 1	57463	protein_coding
ENSG00000156097	GPR61			0					0				0		0	0	0	0	0	0	0	0	0	0	0	0	0	0	0	0	0	0	0	0	0	0	0	0	0.2	0	0	0	G protein-coupled receptor 61	83873	protein_coding
ENSG00000065135	GNAI3			0					0			108.8	1		0	189.628	244.1	187	137.8	0.1	4.6	0	0.3	0.4	0.1	1.3	7.7	2.1	0.7	5.8	0.7	0.3	0.6	0.3	0.4	0.2	8.6	108.8	5	3.6	5.1	0	guanine nucleotide binding protein (G protein), alpha inhibiting activity polypeptide 3	2773	protein_coding
ENSG00000134183	GNAT2			0					0				0		0	2.03718	0.8	0.9	4.3	0	0	0	0.1	0	0	0	0	0	0	0	0	0	0	0	0	0	0	0	0	0.6	0	0	guanine nucleotide binding protein (G protein), alpha transducing activity polypeptide 2	2780	protein_coding
ENSG00000116337	AMPD2			0					0				0		0	0	0	0	0	0	0	0	0	0	0	0	0	0	0	0	0	0	0	0	0	0	0.2	0	0.2	0	0.9	0.5	adenosine monophosphate deaminase 2	271	protein_coding
ENSG00000168765	GSTM4			0					0			11.4	1		0	16.0739	7.7	18.7	21.7	0	0	0	0	0.6	0	0.1	0	0.4	1.2	0.2	0.1	0.1	0	0	0.1	0	3.6	0.8	0.5	11.4	0.9	1	glutathione S-transferase mu 4	2948	protein_coding
ENSG00000213366	GSTM2			0					0				0		0	1.3113	1	2.4	0.5	0	0	0	0	0	0	0	0.2	0	0	0	0	0	0	0	0	0	0.3	0	0	0	0	0.2	glutathione S-transferase mu 2 (muscle)	2946	protein_coding
ENSG00000134184	GSTM1			0					0			2.4	1		0	2.72484	2.2	4	1.9	0	0	0	0	0.1	0	0	0	0	0	0.1	0	0	0	0	0	0	0.8	0.5	0.2	2.4	0	0	glutathione S-transferase mu 1	2944	protein_coding
ENSG00000134201	GSTM5			0					0			13.9	1		0	43.9063	34.2	45.1	52.5	0	0.1	0	0	0	0.2	0.3	1.3	0.1	1	0.3	0.3	0.1	0.3	0.1	0	0.1	13.9	3.8	0.9	1.5	0	0.7	glutathione S-transferase mu 5	2949	protein_coding
ENSG00000134202	GSTM3			0					0			155.4	3		0	114.183	84.4	112.7	145.4	3.9	1.2	0.9	0.8	0.4	0.8	1.4	8.4	0.1	0.3	0.3	0.9	0.6	0.3	0.2	0.4	0.2	182.5	125.5	10.6	13.7	158.3	12	glutathione S-transferase mu 3 (brain)	2947	protein_coding
ENSG00000198758	EPS8L3			0					0				0		0	0	0	0	0	0	0	0	0	0	0	0	0	0	0	0	0	0	0	0	0	0	0	0	0	0.3	0.3	0.2	EPS8-like 3	79574	protein_coding
ENSG00000184371	CSF1			0					0				0		0	0	0	0	0	0	0	0	0	0	0	0	0	0	0	0	0	0	0	0	0	0	0	0.3	0	0.3	0	0	colony stimulating factor 1 (macrophage)	1435	protein_coding
ENSG00000168710	AHCYL1			0					0			228	4		0	163.962	136.1	162.6	193.2	0.2	1	0.3	0.2	0.4	0.5	0.7	1.3	2	7.8	1.3	0.7	0.6	0.2	0.6	0.2	0.4	201.2	178	13.1	289.3	243.4	33.9	adenosylhomocysteinase-like 1	10768	protein_coding
ENSG00000143093	STRIP1			0					0				0		0	13.2188	11.6	16.4	11.7	0	0.1	0.2	0.1	0.1	0	0	0	0	0	0.2	0.1	0	0.1	0	0	0	1	0	0.5	1.8	0.3	1.9	striatin interacting protein 1	85369	protein_coding
ENSG00000156150	ALX3			0					0				0		0	0	0	0	0	0	0	0	0	0	0	0	0	0	0	0	0	0	0	0	0	0	0.5	0	0.2	0.3	0	0.5	ALX homeobox 3	257	protein_coding
ENSG00000186150	UBL4B			0					0			2.5	2		0	2.35192	1.8	3.3	1.9	0	0.4	0	0	0	0	0.4	0	0	0	0	0	0	0	0	0	0	0	0	1.1	3.9	0.3	0	ubiquitin-like 4B	164153	protein_coding
ENSG00000197106	SLC6A17			0					0				0		0	0.395898	0.4	0.2	0.5	0	0	0	0	0	0	0	0	0	0	0	0	0	0	0	0	0	0	0.3	0	0.3	0.3	0.2	solute carrier family 6 (neutral amino acid transporter), member 17	388662	protein_coding
ENSG00000116396	KCNC4			0					0				0		0	0	0	0	0	0	0	0	0	0	0	0	0	0	0	0	0	0	0	0	0	0	0	0	0.2	0.6	0.3	0.2	potassium voltage-gated channel, Shaw-related subfamily, member 4	3749	protein_coding
ENSG00000168679	SLC16A4			0					0				0		0	107.81	108.8	114.9	99.7	0	5.3	0	1.2	0.8	0	1.1	1.3	0	0.5	0	0	0	0	0.3	1.1	0	0.5	0.3	0	1.5	0	0	solute carrier family 16, member 4	9122	protein_coding
ENSG00000134248	LAMTOR5			0					0			119	2		0	63.9543	64.5	56.7	70.7	0.7	0.5	0.9	0.1	0.1	0	0.8	1.6	1.3	3.4	1	0.2	0.7	0.1	0.2	0.9	0.2	219	0.3	4.4	2.7	19.1	1	late endosomal/lysosomal adaptor, MAPK and MTOR activator 5	10542	protein_coding
ENSG00000143125	PROK1			0					0				0		0	0	0	0	0	0	0	0	0	0	0	0	0	0	0	0	0	0	0	0	0	0	0	0	0	0	0	0	prokineticin 1	84432	protein_coding
ENSG00000143105	KCNA10			0					0				0		0	0.0677956	0.2	0	0	0	0	0	0	0	0	0	0	0	0	0	0	0	0	0	0	0	0	0.5	0.4	0.3	0	0.2	potassium voltage-gated channel, shaker-related subfamily, member 10	3744	protein_coding
ENSG00000177301	KCNA2			0					0				0		0	5.12131	5.5	6.9	3	0	0	0	0	0	0	0	0	0.2	0.2	0	0.1	0	0	0	0	0	0	0	0	0	0	0	potassium voltage-gated channel, shaker-related subfamily, member 2	3737	protein_coding
ENSG00000177272	KCNA3			0					0			1.2	1		0	0.146908	0.2	0.2	0	0	0	0	0	0	0	0	0.3	0	0	0	0	0	0	0	0	0	0.3	0	0.5	1.2	0.3	0.2	potassium voltage-gated channel, shaker-related subfamily, member 3	3738	protein_coding
ENSG00000143119	CD53			0					0				0		0	182.744	146.6	191.8	209.8	0.2	3.7	0.3	8.9	0.3	0	1.4	2.5	0.8	0.9	2.1	0.7	1	2	0.8	0.8	0.4	5.3	1.5	1.4	12	0.6	6.2	CD53 molecule	963	protein_coding
ENSG00000121931	LRIF1			0					0			27.5	1		0	51.0674	63.9	56.7	32.6	0.1	0.3	0	0.3	0.4	0.9	0	0.8	1.6	2	2	0.1	0	0	0	0	0	0.8	0.5	0.2	1.5	27.5	0.2	ligand dependent nuclear receptor interacting factor 1	55791	protein_coding
ENSG00000156171	DRAM2			0					0				0		0	708.536	890.4	828.3	406.9	5.4	7.7	0.5	4.7	7.1	0.3	35.8	9.2	5.8	8	6.9	1.4	0.7	3.2	0.1	1.9	0	7.3	0.8	1.8	9.6	0.6	3.8	DNA-damage regulated autophagy modulator 2	128338	protein_coding
ENSG00000162777	DENND2D			0					0			40.1	1		0	55.3509	35.8	66.9	63.3	0.3	0.3	0.2	0	1.1	0	0.1	0.7	0.2	0	0.2	0	0.9	0.2	0.2	0	0	1.2	2.8	5.5	1.5	0.6	40.1	DENN/MADD domain containing 2D	79961	protein_coding
ENSG00000064886	CHI3L2			0					0				0		0	57.5798	49.4	54.8	68.5	0	2.6	0	0.4	0.2	0	0	0.3	0.7	1.2	0	0.1	0.9	0	0.1	1.2	0.1	1.3	0.8	0.4	2.7	0.6	0.2	chitinase 3-like 2	1117	protein_coding
ENSG00000134216	CHIA			0					0				0		0	0.146908	0.2	0.2	0	0	0	0	0	0	0	0	0	0	0	0	0	0	0	0	0	0	0.8	0	0	0.3	0	0	chitinase, acidic	27159	protein_coding
ENSG00000173947	PIFO			0					0			254.6	1		0	393.064	280.3	364.3	534.6	1.7	3.5	0.5	2	1.4	0.8	2.2	11	3.5	6.1	15.1	2.5	4.2	2.4	0.8	5.8	0.7	6.3	9.4	3.4	254.6	1.8	5.3	primary cilia formation	128344	protein_coding
ENSG00000085465	OVGP1			0					0				0		0	33.9874	15.1	30.4	56.5	0.6	0	0	0	0.6	0	0.8	0.7	0.4	5.6	0.3	1.3	0.1	0.1	0	0	0	1	0.3	0.5	0.3	2.1	0	oviductal glycoprotein 1, 120kDa	5016	protein_coding
ENSG00000116455	WDR77			0					0			14.4	1		0	42.8116	32.7	41.1	54.6	1.1	0.5	0	0.3	0.1	0.4	0.3	2.8	0.4	0.9	0.2	0.3	0	0	0	0	0	1	0.5	0.7	1.2	2.7	14.4	WD repeat domain 77	79084	protein_coding
ENSG00000116459	ATP5F1			0					0			256.6	1		0	712.947	632.1	736.5	770.3	3	9.9	1.8	5.5	2.1	2.2	5	23.7	5.1	9.5	10.3	1.2	1.6	3.7	1	2.8	0.3	56.2	256.6	30.8	20.6	74.8	16.6	ATP synthase, H+ transporting, mitochondrial Fo complex, subunit B1	515	protein_coding
ENSG00000143110	C1orf162			0					0				0		0	304.696	216.2	320.6	377.2	2.6	0.3	0.9	1.6	1.2	1.5	10.8	14.8	2.2	4.1	4.8	1.4	1.7	2.3	0.6	0.3	0.4	7.9	1.8	10.4	31.7	1.5	1.7	chromosome 1 open reading frame 162	128346	protein_coding
ENSG00000121933	ADORA3			0					0			219.2	1		0	355.1	281.7	368.6	415	3.1	3.2	1.7	2.6	1.3	1.5	4	3.3	4.5	2.2	1.8	0.7	2.3	0.9	0.9	0.5	0.1	7.8	0	4.6	75.3	219.2	42.1	adenosine A3 receptor	140	protein_coding
ENSG00000116473	RAP1A			0					0			66	3		0	138.168	185.5	118.7	110.3	0.5	6.1	0.9	0.3	1.4	0.1	4.6	1.2	3.9	2.6	2.9	0.6	0.3	0.8	0.1	0.2	0	58.3	4.1	29.6	3.3	80.2	59.4	RAP1A, member of RAS oncogene family	5906	protein_coding
ENSG00000197852	FAM212B			0					0				0		0	1.28927	0.6	1.9	1.4	0	0	0	0	0.1	0	0	0	0	0	0	0	0	0	0	0	0	0.2	0	0	0	0	0.2	family with sequence similarity 212, member B	55924	protein_coding
ENSG00000064703	DDX20			0					0			1062.2	1		0	573.641	576.8	648.6	495.5	4.7	2.7	0.6	1.4	3.6	0.8	5	5.1	3.4	12.3	5.8	1.3	1.6	1.2	0.2	1.9	0.3	30.4	20.5	9.6	75.6	18.8	1062.2	DEAD (Asp-Glu-Ala-Asp) box polypeptide 20	11218	protein_coding
ENSG00000171385	KCND3			0					0				0		0	1.13071	0.2	2.4	0.8	0	0	0	0	0	0	0	0	0	0	0	0	0	0	0	0	0	0	0	0	0	0	0	potassium voltage-gated channel, Shal-related subfamily, member 3	3752	protein_coding
ENSG00000143079	CTTNBP2NL			0					0				0		0	25.3579	26	18.5	31.5	0	3.2	0.6	0	1.1	0.3	0.4	0	0	0	1.8	0	1	0	0	0.1	0	0.8	0.3	0	2.7	0	1.7	CTTNBP2 N-terminal like	55917	protein_coding
ENSG00000134245	WNT2B			0					0			5.8	1		0	0.814597	0.6	0.5	1.4	0	0	0	0	0	0	0	0	0	0	0	0	0	0	0	0	0	0	0	0.2	0	0.9	5.8	wingless-type MMTV integration site family, member 2B	7482	protein_coding
ENSG00000007341	ST7L			0					0				0		0	145.859	134.4	139.8	163.3	2.3	2.5	0	4.7	1.4	0	2.6	4.6	0.7	2.9	0.4	0.1	0.3	1.8	0	0	0.1	3.6	0.3	0.7	20.6	1.2	16.6	suppression of tumorigenicity 7 like	54879	protein_coding
ENSG00000116489	CAPZA1			0					0				0		0	190.762	215.6	199.6	157.1	0	4.4	0.2	1.1	1.6	0.4	6.9	4	0.3	1.4	3	0.3	0.7	1	0.1	0.2	0	10.7	0	0.2	2.1	0.9	25.7	capping protein (actin filament) muscle Z-line, alpha 1	829	protein_coding
ENSG00000155363	MOV10			0					0			3.6	1		0	7.89042	5.7	14.7	3.3	0	0	0	0	0	0	0	0	0	0	0	0	0	0	0	0	0	0.2	0.3	0	1.2	0.9	3.6	Mov10, Moloney leukemia virus 10, homolog (mouse)	4343	protein_coding
ENSG00000155366	RHOC			0					0				0		0	0.70059	1.6	0.5	0	0	0	0	0	0	0	0	0	0	0	0	0	0	0	0	0	0	0	0	0	0	0	0	ras homolog family member C	389	protein_coding
ENSG00000271810	RP11-426L16.10			0					0				0		0	0	0	0	0	0	0	0	0	0	0	0	0	0	0	0	0	0	0	0	0	0	0	0	0	0	0	0	Rho-related GTP-binding protein RhoC	NA	protein_coding
ENSG00000155367	PPM1J			0					0				0		0	0	0	0	0	0	0	0	0	0	0	0	0	0	0	0	0	0	0	0	0	0	0.2	0.3	0	0	0	0	protein phosphatase, Mg2+/Mn2+ dependent, 1J	333926	protein_coding
ENSG00000184599	FAM19A3			0					0				0		0	0	0	0	0	0	0	0	0	0	0	0	0	0	0	0	0	0	0	0	0	0	0	0	0	0	0	0	family with sequence similarity 19 (chemokine (C-C motif)-like), member A3	284467	protein_coding
ENSG00000198799	LRIG2			0					0			24.5	1		0	33.665	38.8	28.7	33.4	0	0	0	0.1	0	0	0	4	0.3	0.2	0.8	0.2	0	0	0	0.6	0	0.5	0	0.4	0.6	0.3	24.5	leucine-rich repeats and immunoglobulin-like domains 2	9860	protein_coding
ENSG00000081026	MAGI3			0					0				0		0	42.4288	51.5	33.7	42.1	0	0.5	0	0	0	0.1	0.3	0.5	0.4	0.7	0.4	0.2	0	0.1	0	0	0	0.5	0.5	0	0	6.7	5.8	membrane associated guanylate kinase, WW and PDZ domain containing 3	260425	protein_coding
ENSG00000116793	PHTF1			0					0			149.7	1		0	194.787	229.8	177.1	177.5	1.2	4.9	1.1	1	0.2	1	8	5.1	7.6	2.6	2.9	0	0.6	0.8	0.2	0.4	0	5.1	1.5	3.7	149.7	1.5	13.7	putative homeodomain transcription factor 1	10745	protein_coding
ENSG00000081019	RSBN1			0					0				0		0	89.5059	113.5	81.6	73.4	0.8	1.8	0.3	0.2	0.8	0	0.7	3.3	4	0.9	4.1	0.1	0.1	0	0	0	0	0.2	0.5	0	0.9	1.5	1.7	round spermatid basic protein 1	54665	protein_coding
ENSG00000134242	PTPN22			0					0			35.7	2		0	18.1562	21.6	22.3	10.6	0	0	0	0.1	0	0	0	0	0.4	0	0.1	0	0	1.3	0	0.2	0	17	0.3	54.4	0.3	0	0.2	protein tyrosine phosphatase, non-receptor type 22 (lymphoid)	26191	protein_coding
ENSG00000188761	BCL2L15			0					0				0		0	1.4025	0.2	2.4	1.6	0	0	0	0	0	0	0	0	0	0	0	0	0	0	0	0	0	0	0	0	0	0	0	BCL2-like 15	440603	protein_coding
ENSG00000134262	AP4B1			0					0			69.2	1		0	218.063	165.6	208.1	280.5	0.3	12.3	1.2	0	0.6	0.4	2.7	3.6	1	5.5	1.1	2.1	0.7	2.9	0.1	0.3	0	2.3	1.8	69.2	4.2	4.2	18.3	adaptor-related protein complex 4, beta 1 subunit	10717	protein_coding
ENSG00000118655	DCLRE1B			0					0				0		0	14.3669	11.2	10.4	21.5	0	0.6	0	0	0	0	0	0	0	0.2	0	0	0	0	0	0	0	0.3	0.3	0.9	1.8	0.3	1	DNA cross-link repair 1B	64858	protein_coding
ENSG00000163349	HIPK1			0					0				0		0	18.621	4.9	23.3	27.7	0	0	0	0.1	0	0	0	0.8	0	0	0	0.1	0	0	0	0	0	0.3	0.5	0	0.9	0	1.2	homeodomain interacting protein kinase 1	204851	protein_coding
ENSG00000116774	OLFML3			0					0			163.3	5		0	26.3386	17.7	34.4	26.9	0	0	0	0.3	0	0.2	0.1	0	0	0.3	0.4	0.1	0	0	0	0	0	23.6	76.6	31.7	3	300.6	383.9	olfactomedin-like 3	56944	protein_coding
ENSG00000134207	SYT6			0					0				0		0	0.282499	0.6	0.2	0	0	0	0	0	0	0.1	0	0	0	0.2	0	0	0	0	0	0	0	0.3	0	0	0	0	0	synaptotagmin VI	148281	protein_coding
ENSG00000197323	TRIM33			0					0				0		0	296.34	308.1	300.9	279.9	0.8	0.6	0.8	4.3	0.4	2.5	2	1.2	5.4	6.5	2.3	2	0.4	4.9	0.7	1.3	0.1	6.1	53	6	9.9	7.9	23.8	tripartite motif containing 33	51592	protein_coding
ENSG00000116752	BCAS2			0					0				0		0	456.224	483.2	455.5	430	0.8	23.6	0.3	3.2	4.4	1.7	2.9	19.1	7.7	5.6	8.2	1.5	1.4	2.7	0.4	0.6	0.3	3	6.3	1.6	13.1	7.3	7.9	breast carcinoma amplified sequence 2	10286	protein_coding
ENSG00000175984	DENND2C			0					0				0		0	6.53913	5.7	3.3	10.6	0	0	0.2	0	0	0	0	0	0.3	0.3	0.5	0	0	0	0	0	0	0.2	0.3	0	0	0	0	DENN/MADD domain containing 2C	163259	protein_coding
ENSG00000116748	AMPD1			0					0				0		0	32.7728	35.4	45.8	17.1	0	1.3	0	0	0.2	0	0	0	0	0	0	0	0	0	0	0.1	0	0.2	0	0	1.5	0.9	0.7	adenosine monophosphate deaminase 1	270	protein_coding
ENSG00000213281	NRAS			0					0				0		0	17.6051	15.5	23.5	13.9	0.3	0	0	0	0.7	0	0	2.6	0	3.2	0	0	0	0	0	0	0	2.5	0	0	0	0.3	0	neuroblastoma RAS viral (v-ras) oncogene homolog	4893	protein_coding
ENSG00000009307	CSDE1			0					0				0		0	148.835	123	155.2	168.2	0.9	0.3	0	0.3	0.4	0	1	0.8	1.5	0.2	2.2	0.6	0.1	0.1	0.1	1	0.3	2	0.5	1.8	2.4	1.2	1.2	cold shock domain containing E1, RNA-binding	7812	protein_coding
ENSG00000052723	SIKE1			0					0				0		0	1.65078	2.6	0.9	1.4	0	0	0	0	0	0	0	0	0.3	0.2	0.1	0	0	0.1	0	0.1	0	0.2	0	0.4	0.9	0	0	suppressor of IKBKE 1	80143	protein_coding
ENSG00000198765	SYCP1			0					0			66.6	3		0	95.2475	92.7	54.1	138.9	2.4	0.5	0.2	0	2.1	0	0.4	5.4	2.1	1.2	2.7	0	0.1	0.3	0	0	0.1	21.3	62.4	91.7	4.5	23	45.7	synaptonemal complex protein 1	6847	protein_coding
ENSG00000134200	TSHB			0					0				0		0	1.66105	4.3	0.7	0	0	0	0	0	0	0	0	0	0.1	0	0	0	0	0	0	0	0	0	0	0	0.3	0	0	thyroid stimulating hormone, beta	7252	protein_coding
ENSG00000134198	TSPAN2			0					0				0		0	101.255	78.7	95.4	129.6	0	0.1	0.2	0	0.5	0.4	1.2	3	7.6	1.7	0.5	0.8	0.6	1.1	0.1	0	0	0	0	0.2	0.3	0	0.2	tetraspanin 2	10100	protein_coding
ENSG00000134259	NGF			0					0				0		0	0	0	0	0	0	0	0	0	0	0	0	0	0	0	0	0	0	0	0	0	0	0	0.3	0	0	0	0	nerve growth factor (beta polypeptide)	4803	protein_coding
ENSG00000173218	VANGL1			0					0			1.9	1		0	2.42071	3.3	0.5	3.5	0	0	0	0	0.1	0	0	0	0	0	0	0	0	0	0	0	0	0	0	0.4	0.3	0.3	1.9	VANGL planar cell polarity protein 1	81839	protein_coding
ENSG00000118729	CASQ2			0					0				0		0	33.6241	27.9	34.4	38.6	0.2	1	0	0.1	0.4	0	0.3	0	0	0.5	0.4	0	0.4	2.3	0	0	0	1	0.5	0	2.4	0.3	0.5	calsequestrin 2 (cardiac muscle)	845	protein_coding
ENSG00000177551	NHLH2			0					0				0		0	0	0	0	0	0	0	0	0	0	0	0	0	0	0	0	0	0	0	0	0	0	0.2	0.3	0.2	0	0	0.2	nescient helix loop helix 2	4808	protein_coding
ENSG00000163393	SLC22A15			0					0				0		0	1.29971	2.4	1.2	0.3	0	0	0	0	0	0	0	0	0	0	0	0	0	0	0	0	0	0.2	0.3	0.4	0	0	0	solute carrier family 22, member 15	55356	protein_coding
ENSG00000173212	MAB21L3			0					0				0		0	0	0	0	0	0	0	0	0	0	0	0	0	0	0	0	0	0	0	0	0	0	0	0.3	0	0	0	0	mab-21-like 3 (C. elegans)	126868	protein_coding
ENSG00000163399	ATP1A1			0					0				0		0	105.798	85.8	101.1	130.5	0	0.5	0.3	0.8	0.6	0	1.6	3	0.7	3.6	0.6	0	0.7	0.8	0.1	0.7	0	5.6	1.3	3.5	2.1	5.8	1.4	ATPase, Na+/K+ transporting, alpha 1 polypeptide	476	protein_coding
ENSG00000269279	AL136376.1			0					0				0		0	0	0	0	0	0	0	0	0	0	0	0	0	0	0	0	0	0	0	0	0	0	0.2	0	0	0	0	0	Uncharacterized protein	NA	protein_coding
ENSG00000116815	CD58			0					0			119	1		0	72.1889	94.6	71.4	50.6	0	0.4	0.8	0.7	1.1	0.2	0.5	0	1	3.6	2	0.2	0.1	0.2	0	0	0	4.3	2.5	8.5	15.5	7	119	CD58 molecule	965	protein_coding
ENSG00000143061	IGSF3			0					0				0		0	0.316618	0.2	0.5	0.3	0	0	0	0	0	0	0	0	0	0	0	0	0	0	0	0	0	0.2	0	0.4	0.6	0.3	0.5	immunoglobulin superfamily, member 3	3321	protein_coding
ENSG00000203864	C1orf137			0					0				0		0	0	0	0	0	0	0	0	0	0	0	0	0	0	0	0	0	0	0	0	0	0	0	0.3	0	0	0	0	chromosome 1 open reading frame 137	388667	protein_coding
ENSG00000116824	CD2			0					0				0		0	27.4947	30.1	19.2	33.2	0.3	0	0	0	0	0	0.2	1.6	0.1	0.9	0.1	0.1	0.3	0	0	0	0	0	0	0.5	0.9	0	0.2	CD2 molecule	914	protein_coding
ENSG00000134247	PTGFRN			0					0			2.4	1		0	0	0	0	0	0	0	0	0	0	0	0	0	0	0	0	0	0	0	0	0	0	0	0.3	0	0	2.4	0.2	prostaglandin F2 receptor inhibitor	5738	protein_coding
ENSG00000134256	CD101			0					0				0		0	14.2701	13	17.6	12.2	0	0	0	0.1	0	0	0	0	0.3	0.3	0	0	0	0	0	0	0	0	0.5	0.2	0	0	0.2	CD101 molecule	9398	protein_coding
ENSG00000116830	TTF2			0					0			10.3	1		0	36.2751	25.6	35.4	47.8	0	0.1	0	0.1	0	0.5	0	0	2.4	0	0.1	0.1	0.4	0.2	0.1	0	0	0.8	0.3	0.2	8.7	2.7	10.3	transcription termination factor, RNA polymerase II	8458	protein_coding
ENSG00000134253	TRIM45			0					0				0		0	2.61222	1.8	3.6	2.4	0	0	0	0	0	0	0	0	0	0	0	0	0	0	0	0	0	0.5	0	0	0	0.3	0	tripartite motif containing 45	80263	protein_coding
ENSG00000134258	VTCN1			0					0				0		0	3.45878	4.1	5.2	1.1	0	0	0	0	0	0	0	0	0	0	0	0	0	0	0	0	0	0.2	0.3	0	0	0	0.2	V-set domain containing T cell activation inhibitor 1	79679	protein_coding
ENSG00000198162	MAN1A2			0					0			29.9	3		0	68.2586	67.9	85.2	51.6	0.9	1.3	0.6	0.8	0.6	7	2.7	0.3	1.7	2.4	0.4	0	0	1	0.1	0.5	0.1	47.8	18.5	23.4	3.3	2.1	1.9	mannosidase, alpha, class 1A, member 2	10905	protein_coding
ENSG00000183508	FAM46C			0					0			26	4		0	28.6589	18.3	35.6	32.1	0	0	0	0	0	0	0.1	0.5	0.2	0.2	0	0	0.1	0	0.1	0	0	34.7	0	35.6	23.9	9.7	0.2	family with sequence similarity 46, member C	54855	protein_coding
ENSG00000196505	GDAP2			0					0			103.7	2		0	50.9331	63.5	38	51.4	0.8	2.3	0	0	1.1	0	0.2	0	0.3	0.5	0.5	0	0	0.3	0	0	0	161.7	0.3	2.7	1.8	3.9	45.7	ganglioside induced differentiation associated protein 2	54834	protein_coding
ENSG00000065183	WDR3			0					0			64.1	2		0	82.0974	105.8	76.7	63.9	0.2	1.3	0.6	0.9	0.3	0	0.1	5.8	1.7	0.7	3.8	0.1	0.3	0.3	0	0.5	0	40.5	87.7	8.3	4.2	0.3	3.4	WD repeat domain 3	10885	protein_coding
ENSG00000155761	SPAG17			0					0			15441.9	3		0	344.653	374.6	374.8	284.6	3.4	4.3	0	4	2.3	0.4	0.1	4.5	3.8	2.6	3.3	1.2	1	0.3	0.2	3.1	0	4765	13764.4	27796.2	29.9	29.4	70.7	sperm associated antigen 17	200162	protein_coding
ENSG00000092607	TBX15			0					0				0		0	6.49085	2.8	10.9	5.7	0.2	0	0	0	0	0	0	0	0	0	0	0	0	0.2	0	0	0	0.3	0.3	0.5	0.3	0	0.2	T-box 15	6913	protein_coding
ENSG00000116874	WARS2			0					0				0		0	9.40118	8.7	4.5	14.9	0	0	0	0	0	0	0	0	0.1	0.2	0.4	0	0.1	0	0	0	0	0.5	0.3	0.5	0	0.3	0	tryptophanyl tRNA synthetase 2, mitochondrial	10352	protein_coding
ENSG00000116882	HAO2			0					0				0		0	479.421	425.3	479.2	533.8	1.1	2.5	1.4	2.2	0.2	0.6	1	13.8	1.2	6.1	8.7	0.8	1	1.1	0.8	0.9	0.4	7.1	1.5	40.9	43.6	13.6	10.3	hydroxyacid oxidase 2 (long chain)	51179	protein_coding
ENSG00000203859	HSD3B2			0					0				0		0	13.5132	14.2	13.5	12.8	0	0	0	0	0	0	0.1	0	0	0	0	0	0	0	0	0	0	0	0	0.4	0	0	0	hydroxy-delta-5-steroid dehydrogenase, 3 beta- and steroid delta-isomerase 2	3284	protein_coding
ENSG00000203857	HSD3B1			0					0				0		0	0.0905969	0	0	0.3	0	0	0	0	0	0	0	0	0	0	0	0	0	0	0	0	0	0	0.3	0	0	0	0	hydroxy-delta-5-steroid dehydrogenase, 3 beta- and steroid delta-isomerase 1	3283	protein_coding
ENSG00000143067	ZNF697			0					0				0		0	0.452985	0	0	1.4	0	0	0	0	0	0	0	0	0	0	0	0	0	0	0	0	0	0.3	0.3	0.2	0	0.3	0.2	zinc finger protein 697	90874	protein_coding
ENSG00000092621	PHGDH			0					0				0		0	0.158393	0.2	0	0.3	0	0	0	0	0	0	0	0	0	0	0	0	0	0	0	0	0	0	0.3	0	0	0	0.2	phosphoglycerate dehydrogenase	26227	protein_coding
ENSG00000134240	HMGCS2			0					0			1093.1	6		0	85.9127	49.8	73.1	134.8	0.1	8	0	0	0.1	0	0.5	0.8	0.3	0.2	0.2	0.2	0.6	0.5	0.1	0.5	0.1	199.5	150.4	127.3	5924.3	34.8	122.3	3-hydroxy-3-methylglutaryl-CoA synthase 2 (mitochondrial)	3158	protein_coding
ENSG00000134249	ADAM30			0					0				0		0	189.187	159.5	161.9	246.2	0.3	2.1	0.9	0.1	1.9	0.8	2.4	2.3	1.5	1.2	12.3	0.5	0.6	0.5	0.6	0.5	0.2	2.3	0.8	1.9	3.3	0.3	1.9	ADAM metallopeptidase domain 30	11085	protein_coding
ENSG00000134250	NOTCH2			0					0			103.5	5		0	9.3174	7.7	12.3	7.9	0	0.9	0	0.1	0	0	0	0.7	0	0.2	0.3	0	0	0	0	0	0	18.8	279.7	154.1	2.4	62.4	1.7	notch 2	4853	protein_coding
ENSG00000188610	FAM72B			0					0				0		0	2.57861	2.8	1.9	3	0	0	0	0	0	0	0	0	0	0	0	0	0.1	0	0	0	0	0	0.3	0	0	0	0	family with sequence similarity 72, member B	653820	protein_coding
ENSG00000198019	FCGR1B			0					0				0		0	1.76412	0.8	2.8	1.6	0.7	0	0	0	0.1	0	0.3	0	0.2	0	0.1	0	0	0	0	0	0	0	0	0	0	0	0.2	Fc fragment of IgG, high affinity Ib, receptor (CD64)	2209	protein_coding
ENSG00000215784	FAM72D			0					0				0		0	5.26856	6.1	6.2	3.5	0	0	0	0.1	0.1	0	0.1	0	0.2	0	0	0	0	0	0	0	0	0	0	0	0.3	0	0	family with sequence similarity 72, member D	728833	protein_coding
ENSG00000162825	NBPF8			0					0			6.4	1		0	11.0731	9.2	10.2	13.9	0	0	0	0	0	0	0	0	0.2	0	0.6	0	0	0	0	0.8	0	0.3	0	0	0	6.4	1	neuroblastoma breakpoint family, member 8	25832	protein_coding
ENSG00000231360	AL592284.1			0					0				0		0	0.4415	0	0.2	1.1	0	0	0	0	0	0	0	0	0	0	0	0	0	0	0	0	0	0	0	0	0	0	0.2	Protein LOC642441	730256	protein_coding
ENSG00000168614	NBPF9			0					0			2.7	1		0	2.51003	3.3	2.4	1.9	0	0	0	0	0.1	0	0.1	0	0	0.3	0.4	0	0	0	0	0	0	0.2	0	0.4	0	2.7	0.2	neuroblastoma breakpoint family, member 9	25832	protein_coding
ENSG00000178104	PDE4DIP			0					0			117.6	2		0	174.247	136.5	192.5	193.8	0	0.5	0.2	0.5	0.1	3	1.5	10.7	0.7	2	0.9	1.3	0.9	0.7	0.1	0.1	0	15	2.3	1.9	53.2	30.3	182	phosphodiesterase 4D interacting protein	9659	protein_coding
ENSG00000268172	AL590452.1			0					0				0		0	1.36778	1.4	2.1	0.5	0	0	0	0	0	0	0	0	0	0	0	0	0	0	0	0	0	0	0	0.2	0	0	0	Uncharacterized protein	NA	protein_coding
ENSG00000213240	NOTCH2NL			0					0			42.5	4		0	18.192	13.8	11.4	29.4	0	4.4	0	0.1	0	0	0	1.2	0.1	0	0.7	0	0	0	0	0	0.1	5.6	82.7	59	3.6	22.7	0.5	notch 2 N-terminal like	388677	protein_coding
ENSG00000255168	RP11-458D21.5			0					0				0		0	0	0	0	0	0	0	0	0	0	0	0	0	0	0	0	0	0	0	0	0	0	0	0	0	0	0	0	Uncharacterized protein	NA	protein_coding
ENSG00000163386	NBPF10			0					0			4.8	1		0	6.53951	3.1	5.7	10.9	0	0.1	0	0	0	0	0.1	0	0.2	0	0.6	0	0	0	0	0	0	0	0	0.2	0.3	4.8	0.7	neuroblastoma breakpoint family, member 10	25832	protein_coding
ENSG00000168509	HFE2			0					0				0		0	1.71996	1.4	0.5	3.3	0	0	0	0	0	0	0	0	0	0	0	0	0	0	0	0	0	0.2	0	0	0	0.3	0	hemochromatosis type 2 (juvenile)	148738	protein_coding
ENSG00000117289	TXNIP			0					0				0		0	41.6781	30.7	44.9	49.5	0.2	0	0	0	0.1	0.1	0	0.3	0.2	0.7	0	0.2	0.1	0	0	0.1	0.2	0.5	0.8	0.2	2.1	2.7	4.1	thioredoxin interacting protein	10628	protein_coding
ENSG00000121851	POLR3GL			0					0				0		0	55.2148	44.1	74.8	46.7	0.6	0	0.5	0.1	0.5	0.5	0.9	0	0.1	1.2	1.3	0	0.1	0.1	0	1.3	0	0.3	0.3	0.4	2.7	0	1	polymerase (RNA) III (DNA directed) polypeptide G (32kD)-like	84265	protein_coding
ENSG00000181039	ANKRD34A			0					0			1	1		0	0	0	0	0	0	0	0	0	0	0	0	0	0	0	0	0	0	0	0	0	0	0	1	0.2	0.3	0	1	ankyrin repeat domain 34A	284615	protein_coding
ENSG00000152022	LIX1L			0					0				0		0	2.52334	0.8	2.1	4.6	0	0	0	0	0	0	0	0	0.1	0	0.4	0	0	0	0	0	0	0	0.3	0	0.3	0	0.2	Lix1 homolog (mouse)-like	128077	protein_coding
ENSG00000131795	RBM8A			0					0			141.5	1		0	157.737	126.7	133.1	213.4	0.1	3.6	0	0.5	0.6	0.3	1.9	4.3	1.7	1.5	0.9	0	1.2	1.8	0	0.5	0.4	141.5	0	6.6	9.3	3	5	RNA binding motif protein 8A	9939	protein_coding
ENSG00000131779	PEX11B			0					0				0		0	53.0084	43.9	55.3	59.8	0.7	1.9	0	0.9	0.2	0.3	0.1	0.5	0.2	0.5	0	0.1	0.1	0.2	0	0.2	0	1.3	0	0.2	10.5	1.5	12.7	peroxisomal biogenesis factor 11 beta	8799	protein_coding
ENSG00000143127	ITGA10			0					0				0		0	0.735317	0.4	0.7	1.1	0	0	0	0	0	0	0	0	0	0	0	0	0	0.1	0	0	0	0.2	0.3	0.4	0.9	0.3	0.7	integrin, alpha 10	8515	protein_coding
ENSG00000198483	ANKRD35			0					0			1.2	1		0	0	0	0	0	0	0	0	0	0	0	0	0	0	0	0	0	0	0	0	0	0	0.3	0.8	0.5	1.2	0	0.7	ankyrin repeat domain 35	148741	protein_coding
ENSG00000131788	PIAS3			0					0				0		0	1.06281	1.4	0.9	0.8	0	0	0	0.1	0	0	0	0	0	0	0.1	0	0	0	0	0	0	0	0	0	0.3	0	0.5	protein inhibitor of activated STAT, 3	10401	protein_coding
ENSG00000186364	NUDT17			0					0				0		0	0.497812	0.2	0.5	0.8	0	0	0	0	0	0	0	0	0	0	0	0	0	0	0	0	0	0.5	0	0.5	0	0	0	nudix (nucleoside diphosphate linked moiety X)-type motif 17	200035	protein_coding
ENSG00000186141	POLR3C			0					0				0		0	133.482	138.3	133.9	128.3	0.2	1.7	1.4	0.4	0.1	0.2	3.7	2.8	5.5	2	2.6	0.9	0.6	1.1	0.2	0	0.1	15.9	7.1	1.2	9	1.2	6.2	polymerase (RNA) III (DNA directed) polypeptide C (62kD)	10623	protein_coding
ENSG00000121848	RNF115			0					0				0		0	146.126	97.8	136.7	203.8	0.6	2.5	0	1.9	0.2	0.1	1.3	2	1.1	0.7	2.1	0.3	0.6	0.1	0.2	0.2	0.1	0.5	0.8	1.6	7.2	22.7	0.5	ring finger protein 115	27246	protein_coding
ENSG00000117281	CD160			0					0			96.6	1		0	71.4688	49	81.4	84	0.5	1	0.3	0	0	0	0.2	3.3	0.9	1.7	0.1	0.1	0.6	0	0	0.1	0.1	0.5	0.3	0.2	0.3	96.6	1.2	CD160 molecule	11126	protein_coding
ENSG00000174827	PDZK1			0					0				0		0	113.276	99.7	114.9	125.3	0.2	1.9	0.2	8.6	0.6	0	0.5	0.7	0.3	2.6	1.3	0.1	0.1	0.3	0.1	0	0	1.8	0.3	0.4	13.7	1.5	5.5	PDZ domain containing 1	5174	protein_coding
ENSG00000117262	GPR89A			0					0			19.7	1		0	77.9077	83.4	84	66.3	0.8	0.4	0.2	1.2	0.7	2	1.3	1.5	0.9	2.2	1.3	0	1.6	0.1	0	0	0	0.8	0.5	10.8	3	19.7	2.6	G protein-coupled receptor 89A	51463	protein_coding
ENSG00000196644	GPR89C			0					0			101.7	1		0	184.292	253.6	213.4	85.9	2.4	1.9	0.5	2.4	1.1	3.6	3	6.6	2.9	12.8	4.2	0.5	0.6	0.5	0.1	0.1	0.1	4.6	0.3	32.1	9.3	101.7	5	G protein-coupled receptor 89C	728932	protein_coding
ENSG00000152042	NBPF11			0					0				0		0	7.39644	5.5	8.5	8.2	0	0	0	0	0	0	0.1	0	0	0	0.2	0	0	0	0	0.7	0	0.2	0.3	0	0.3	1.2	0.5	neuroblastoma breakpoint family, member 11	200030	protein_coding
ENSG00000186275	NBPF12			0					0			3.9	1		0	3.86909	1.8	3.8	6	0	0.1	0	0.1	0	0	0	0	0	0	0.4	0	0	0	0	0	0	0.2	0	0	0.3	3.9	0	neuroblastoma breakpoint family, member 12	NA	protein_coding
ENSG00000131791	PRKAB2			0					0				0		0	0.158225	0	0.5	0	0	0	0	0	0	0	0	0	0	0	0	0	0	0	0	0	0	0	0	0	0.3	0	0	protein kinase, AMP-activated, beta 2 non-catalytic subunit	5565	protein_coding
ENSG00000131781	FMO5			0					0			155.3	2		0	108.116	110	113.2	101.1	0.3	2.6	0	0.1	0.4	0.1	1	1.6	0.8	1.4	0.9	0.3	0	0.4	0	0.1	0.4	95.4	0.3	7.1	2.4	0	215.1	flavin containing monooxygenase 5	2330	protein_coding
ENSG00000131778	CHD1L			0					0				0		0	191.131	171.9	188.4	213.1	0.1	1.4	0.6	0.6	2	0.9	2.3	13	2.1	6.3	3.9	1.6	0.1	1.5	0.1	0.7	0	21	0.5	3.9	13.4	8.8	37	chromodomain helicase DNA binding protein 1-like	9557	protein_coding
ENSG00000116128	BCL9			0					0			73	2		0	1.91102	1	3.1	1.6	0	0	0	0	0	0	0	0	0	0	0	0	0	0	0	0	0	1.5	0.8	144.5	0	0	0.2	B-cell CLL/lymphoma 9	607	protein_coding
ENSG00000162836	ACP6			0					0			135	1		0	59.0862	44.1	43.4	89.7	0.2	0.6	0.3	0	0	0	0.2	0	0	0.7	3.4	0	0	0	0.2	0	0	1.8	0	0.4	0.9	135	1	acid phosphatase 6, lysophosphatidic	51205	protein_coding
ENSG00000143140	GJA5			0					0			2	1		0	4.52458	4.5	2.8	6.3	0	0.3	0	0	0	0	0	0	0	0	0	0	0.3	0	0	0	0	0.2	2	0	0.6	0	0	gap junction protein, alpha 5, 40kDa	2702	protein_coding
ENSG00000121634	GJA8			0					0				0		0	0	0	0	0	0	0	0	0	0	0	0	0	0	0	0	0	0	0	0	0	0	0.2	0	0.2	0.3	0	0	gap junction protein, alpha 8, 50kDa	2703	protein_coding
ENSG00000188092	GPR89B			0					0				0		0	52.6334	51.9	65.3	40.8	0.1	0.4	0.3	1.1	0.7	2.3	0.3	1.5	0.3	0	0.3	0	0.6	0	0	0	0	1	0.5	12.7	2.4	5.4	0.2	G protein-coupled receptor 89B	51463	protein_coding
ENSG00000203836	NBPF24			0					0				0		0	2.00256	0.6	2.1	3.3	0	0	0	0	0	0	0	0	0	0	0	0	0	0.1	0	0	0	0.2	0	0	0.3	0.3	0.2	neuroblastoma breakpoint family, member 24	NA	protein_coding
ENSG00000269647	BX842679.1			0					0				0		0	0	0	0	0	0	0	0	0	0	0	0	0	0	0	0	0	0	0	0	0	0	0	0	0	0	0	0	Uncharacterized protein FLJ46360	NA	protein_coding
ENSG00000255963	PPIAL4A			0					0			3.6	2		0	0.0905969	0	0	0.3	0.2	0	0.2	0	0.4	0	0	0	0	0.5	0	0	0	0	0	0	0	2.3	0.5	5	0	0.3	0.7	peptidylprolyl isomerase A (cyclophilin A)-like 4A	164022	protein_coding
ENSG00000122497	NBPF14			0					0				0		0	7.37425	4.9	8.5	8.7	0	0	0	0	0	0	0	0	0	0.2	0	0	0	0	0	0	0	0	0	0.2	0.3	0.6	0	neuroblastoma breakpoint family, member 14	25832	protein_coding
ENSG00000256374	PPIAL4D			0					0				0		0	0	0	0	0	0	0	0	0	0	0	0	0	0	0	0	0	0	0	0	0	0	0	0	0	0	0	0	peptidylprolyl isomerase A (cyclophilin A)-like 4D	645142	protein_coding
ENSG00000203832	NBPF20			0					0			1.2	1		0	3.59592	3.3	4.3	3.3	0	0	0	0	0	0	0.1	0	0	0	0	0	0	0	0	0.5	0	0.2	0	0.4	0	1.2	0.2	neuroblastoma breakpoint family, member 20	25832	protein_coding
ENSG00000243452	NBPF15			0					0			2.4	1		0	2.29621	0.8	3.1	3	0	0	0	0	0	0	0	0	0	0	0.2	0	0	0	0	0	0	0.3	0.3	0.2	0	2.4	0	neuroblastoma breakpoint family, member 15	284565	protein_coding
ENSG00000203827	NBPF16			0					0				0		0	0.0905969	0	0	0.3	0	0	0	0	0	0	0	0	0	0	0	0	0	0	0	0	0	0	0	0	0	0	0	neuroblastoma breakpoint family, member 16	728936	protein_coding
ENSG00000203818	HIST2H3PS2			0					0				0		0	0.0905969	0	0	0.3	0	0	0	0	0	0	0	0	0	0	0	0	0	0	0	0	0	0.2	0	0	0	0	0.2	histone cluster 2, H3, pseudogene 2	NA	protein_coding
ENSG00000203817	FAM72C			0					0				0		0	0.248989	0.2	0	0.5	0	0	0	0	0	0	0	0	0	0	0	0	0	0	0	0	0	0	0	0	0	0.3	0	family with sequence similarity 72, member C	NA	protein_coding
ENSG00000203815	FAM231D			0					0				0		0	0.0677956	0.2	0	0	0	0	0	0	0	0	0	0	0	0	0	0	0	0	0	0	0	0	0	0	0	0.6	0	family with sequence similarity 231, member D	644634	protein_coding
ENSG00000150337	FCGR1A			0					0				0		0	5.09939	3.7	7.8	3.8	0.2	0	0	0	0.3	0	0.9	0	0	0	0.2	0	0	0	0	0	0	0	0	0	0.3	0.3	0	Fc fragment of IgG, high affinity Ia, receptor (CD64)	2209	protein_coding
ENSG00000203814	HIST2H2BF			0					0				0		0	0.0905969	0	0	0.3	0.1	0	0	0	0	0	0	0	0	0	0	0	0	0	0	0	0	0	0	0	0	0	0	histone cluster 2, H2bf	440689	protein_coding
ENSG00000183598	HIST2H3D			0					0				0		0	0.362388	0	0	1.1	0	0	0	0	0	0	0	0	0	0	0	0	0	0	0	0	0	0	0	0	0	0	0	histone cluster 2, H3d	126961	protein_coding
ENSG00000183941	HIST2H4A			0					0				0		0	0	0	0	0	0	0	0	0	0	0	0	0	0	0	0	0	0	0	0	0	0	0	0	0	0	0	0	histone cluster 2, H4a	8294	protein_coding
ENSG00000203811	HIST2H3C			0					0				0		0	0	0	0	0	0	0	0	0	0	0	0	0	0	0	0	0	0	0	0	0	0	0	0	0	0	0	0	histone cluster 2, H3c	126961	protein_coding
ENSG00000183558	HIST2H2AA3			0					0				0		0	0.0905969	0	0	0.3	0	0	0	0	0	0	0	0	0	0	0	0	0	0	0	0	0	0.3	0	0.2	0	0	0	histone cluster 2, H2aa3	8337	protein_coding
ENSG00000203812	HIST2H2AA4			0					0				0		0	0.158225	0	0.5	0	0	0	0	0	0	0	0	0	0	0	0	0	0	0	0	0	0	0.2	0	0	0	0	0	histone cluster 2, H2aa4	8337	protein_coding
ENSG00000203852	HIST2H3A			0					0				0		0	0	0	0	0	0	0	0	0	0	0	0	0	0	0	0	0	0	0	0	0	0	0.2	0.3	0.7	0	0	0	histone cluster 2, H3a	126961	protein_coding
ENSG00000182217	HIST2H4B			0					0				0		0	0.372929	0.4	0.7	0	0	0	0	0	0	0	0	0	0	0	0	0	0	0	0	0	0	0	0	0	0	0	0	histone cluster 2, H4b	8294	protein_coding
ENSG00000184678	HIST2H2BE			0					0				0		0	0	0	0	0	0	0	0	0	0	0	0	0	0	0	0	0	0	0	0	0	0	0	0	0	0	0	0	histone cluster 2, H2be	8349	protein_coding
ENSG00000184260	HIST2H2AC			0					0				0		0	0	0	0	0	0	0	0	0	0	0	0	0	0	0	0	0	0	0	0	0	0	0	0	0	0	0	0	histone cluster 2, H2ac	8338	protein_coding
ENSG00000184270	HIST2H2AB			0					0				0		0	0	0	0	0	0	0	0	0	0	0	0	0	0	0	0	0	0	0	0	0	0	0	0	0	0	0	0	histone cluster 2, H2ab	317772	protein_coding
ENSG00000178096	BOLA1			0					0				0		0	0	0	0	0	0	0	0	0	0	0	0	0	0	0	0	0	0	0	0	0	0	0	0	0	0	0	0	bolA family member 1	51027	protein_coding
ENSG00000159164	SV2A			0					0			3.7	6		0	0	0	0	0	0	0	0	0	0	0	0	0	0	0	0	0	0	0	0	0	0	2.3	1.5	1.8	3.9	10.6	1.9	synaptic vesicle glycoprotein 2A	9900	protein_coding
ENSG00000143368	SF3B4			0					0				0		0	0.214704	0.4	0.2	0	0	0	0	0	0	0	0	0	0	0	0	0	0	0	0	0	0	0.5	0.8	0	0	0.3	0	splicing factor 3b, subunit 4, 49kDa	10262	protein_coding
ENSG00000014914	MTMR11			0					0			68.1	3		0	40.5656	37.2	41.5	42.9	0	0.3	0	0.2	0	0	0	0	3.8	0	0.4	0	0	0.3	0.1	0.2	0	10.6	0.5	2.1	137.2	8.2	56.5	myotubularin related protein 11	10903	protein_coding
ENSG00000163113	OTUD7B			0					0				0		0	1.80944	1.6	1.9	1.9	0	0	0	0	0	0	0	0.2	0	0.2	0	0	0	0	0	0	0	0	0.3	0.2	0.3	0	0	OTU domain containing 7B	56957	protein_coding
ENSG00000136631	VPS45			0					0			503.1	5		0	438.877	401.7	424.4	490.6	2	5.9	0.3	0.8	1.1	0.4	3.4	12	1.4	3.9	4	0.6	0.3	1	0.8	0.7	0.3	1120.2	370	493.3	56.8	242.8	289.4	vacuolar protein sorting 45 homolog (S. cerevisiae)	11311	protein_coding
ENSG00000023902	PLEKHO1			0					0			1.2	1		0	0.622086	0.8	0.2	0.8	0	0	0	0	0	0	0	0	0	0	0	0	0	0	0	0.1	0	1.2	0	0	0.3	0	0	pleckstrin homology domain containing, family O member 1	51177	protein_coding
ENSG00000143401	ANP32E			0					0				0		0	31.3484	38	39.2	16.9	0.5	3.1	0.3	0.3	0.5	0.1	0.5	0.3	0.3	0.2	0	0.2	0.1	0.2	0	0.1	0	0	0.3	0.7	0.6	0.6	1	acidic (leucine-rich) nuclear phosphoprotein 32 family, member E	81611	protein_coding
ENSG00000118298	CA14			0					0				0		0	33.719	19.1	37.7	44.3	0	0.1	0	0	0	0	0	0.8	0.1	0.2	0	0.1	0	0	0	0.4	0	0	0.3	0	4.2	0	0	carbonic anhydrase XIV	23632	protein_coding
ENSG00000117362	APH1A			0					0			14.5	1		0	0.938536	0.8	1.2	0.8	0	0	0	0	0	0	0	0	0	0	0	0.1	0	0	0	0	0	0.2	0	0	0	14.5	1	APH1A gamma secretase subunit	51107	protein_coding
ENSG00000118292	C1orf54			0					0				0		0	37.7912	32.1	30.1	51.1	0	0.3	0	0.3	0	0	1	2.8	0.4	1.2	2.4	0.1	0	1.4	0	0	0	0.5	1	0.9	0.9	3	0	chromosome 1 open reading frame 54	79630	protein_coding
ENSG00000159208	C1orf51			0					0			122.2	2		0	58.1097	43.7	64.6	66	0	1.7	0	0.9	0.2	0.3	5.4	9.1	0.3	3.4	1.8	0.5	0	0.7	0.3	0.3	0	167.4	0.8	0.7	2.7	76.9	0	chromosome 1 open reading frame 51	148523	protein_coding
ENSG00000187145	MRPS21			0					0			417.7	3		0	85.2553	60.4	79	116.3	0.6	10.3	0.5	0.5	0.1	0.5	0.9	8.1	1.1	3.1	1.4	1.3	0.6	0.3	0.2	0.7	0.2	40	8.6	3.2	41.5	1171.5	7	mitochondrial ribosomal protein S21	54460	protein_coding
ENSG00000117360	PRPF3			0					0				0		0	149.318	120.2	164.9	162.8	0.1	4.8	0	0.1	0.1	0	0.4	1	1.4	1.2	1.9	0	0.6	0.6	0.7	0.2	0.1	2.6	3.3	0.5	12.6	0.6	2.9	pre-mRNA processing factor 3	9129	protein_coding
ENSG00000163125	RPRD2			0					0				0		0	5.56415	7.1	3.3	6.3	0	0.1	0	0	0	0	0	0	0	0.2	0.6	0	0	0.1	0	0.3	0	1.2	0	0	0	0.3	0	regulation of nuclear pre-mRNA domain containing 2	23248	protein_coding
ENSG00000143374	TARS2			0					0			15.8	2		0	0	0	0	0	0	0	0	0	0	0	0	0	0	0	0	0	0	0	0	0	0	1	0.5	0	12.8	18.8	0.2	threonyl-tRNA synthetase 2, mitochondrial (putative)	80222	protein_coding
ENSG00000143369	ECM1			0					0				0		0	2.64657	3.3	1.4	3.3	0	0.4	0	0	0	0	0	0	0	0.3	0	0	0	0	0	0	0	0	0	0.5	0	0	0.2	extracellular matrix protein 1	1893	protein_coding
ENSG00000143382	ADAMTSL4			0					0			1.2	1		0	0	0	0	0	0	0	0	0	0	0	0	0	0	0	0	0	0	0	0	0	0	0.3	0.3	0.9	0.6	1.2	0.2	ADAMTS-like 4	54507	protein_coding
ENSG00000225996	AL356356.1			0					0				0		0	0	0	0	0	0	0	0	0	0	0	0	0	0	0	0	0	0	0	0	0	0	0	0	0	0	0	0	Protein LOC100996516	NA	protein_coding
ENSG00000203804	ADAMTSL4-AS1			0					0				0		0	0	0	0	0	0	0	0	0	0	0	0	0	0	0	0	0	0	0	0	0	0	0.2	0	0	0	0	0	ADAMTSL4 antisense RNA 1	NA	protein_coding
ENSG00000143384	MCL1			0					0				0		0	20.2621	25.2	19	16.6	0.2	0.9	0	1.2	0	0	0.4	0	0.2	0	0.1	0.3	0	0	0	0	0	0.3	0.8	0	0.6	0.3	1.9	myeloid cell leukemia sequence 1 (BCL2-related)	4170	protein_coding
ENSG00000143420	ENSA			0					0				0		0	6.04088	6.5	2.4	9.2	0.1	0	0	0.1	0	0.8	0	0	0	0	0.4	0	0	0	0	0	0	0	0	0	0.3	0	0	endosulfine alpha	2029	protein_coding
ENSG00000143457	GOLPH3L			0					0			268.1	1		0	129.422	96.6	138.4	153.3	0	0	1.1	0.4	0.9	0.3	1.6	0.7	0	0.3	7.8	0.1	0.1	0	0.1	0.3	0	3.1	0.3	268.1	1.5	0	0.5	golgi phosphoprotein 3-like	55204	protein_coding
ENSG00000143452	HORMAD1			0					0			70.2	1		0	218.034	236.7	173	244.3	0.1	26.8	0.6	1.8	7.6	3.3	6	12.9	4.1	3.6	3.6	0.1	0.1	0.2	0	2.3	0	2.8	70.2	7.1	7.5	2.4	5.3	HORMA domain containing 1	84072	protein_coding
ENSG00000163131	CTSS			0					0				0		0	3.57467	2.2	3.3	5.2	0	0	0.2	0	0	0	0	0	0	0	0	0	0	0	0	0	0	0	0	0.4	0.3	0.3	0.7	cathepsin S	1520	protein_coding
ENSG00000143387	CTSK			0					0			1387.2	5		0	247.225	194.2	259.9	287.6	1.1	6.6	0.8	1.6	1.2	1.1	1.3	2.1	2	2.2	2.2	0.5	0.4	0.3	0.3	0.6	0.1	300.2	39.8	82.3	106.7	5021	1425.6	cathepsin K	1513	protein_coding
ENSG00000143437	ARNT			0					0			8.5	1		0	13.3782	14.6	11.6	13.9	0	0	0	0.1	0.1	0	0	0	0	0	0.6	0	0	0	0	0.3	0	0.3	0	0	0.9	8.5	1.4	aryl hydrocarbon receptor nuclear translocator	405	protein_coding
ENSG00000143379	SETDB1			0					0			378.1	6		0	94.6137	70	112.5	101.4	1	0.9	0.5	0.6	0.9	0	0.3	0.3	0.7	3.1	0.5	0.3	0	0.1	0.4	0.4	0	43.8	214	27.3	349.9	451.7	1182.1	SET domain, bifurcated 1	9869	protein_coding
ENSG00000143418	CERS2			0					0			87.3	5		0	33.3984	23.4	38.2	38.6	0	0.8	0.2	0.1	0.2	0.1	0.5	1.6	0.8	1.5	0.5	0.1	0	0.1	0.1	0	0	9.1	42.4	5.1	74.4	72	238.4	ceramide synthase 2	29956	protein_coding
ENSG00000143412	ANXA9			0					0			22.6	2		0	5.9282	4.5	3.8	9.5	0	0.6	0	0	0	0.1	0	0.7	0.1	0	0	0.1	0	0	0	0	0	0.3	0	36.5	0	0.3	8.7	annexin A9	8416	protein_coding
ENSG00000143409	FAM63A			0					0				0		0	0.825138	1	1.2	0.3	0	0	0	0	0	0	0	0	0	0	0	0	0	0	0	0	0	0.2	0	0.4	0.3	0	0	family with sequence similarity 63, member A	55793	protein_coding
ENSG00000143363	PRUNE			0					0				0		0	13.5638	10.6	9.7	20.4	0	0.3	0	0	0	0.1	0.1	0	0	0	0	0	0	0	0.1	0	0	0	0	1.1	0.6	0	0.2	prune exopolyphosphatase	58497	protein_coding
ENSG00000163141	BNIPL			0					0				0		0	0	0	0	0	0	0	0	0	0	0	0	0	0	0	0	0	0	0	0	0	0	0	0	0.2	0	0	0.2	BCL2/adenovirus E1B 19kD interacting protein like	149428	protein_coding
ENSG00000143443	C1orf56			0					0				0		0	2.27297	2	2.6	2.2	0	0.1	0	0	0	0	0	0	0	0	0	0	0	0	0.2	0	0	0	0.3	0	0.6	0.3	0.2	chromosome 1 open reading frame 56	54964	protein_coding
ENSG00000197622	CDC42SE1			0					0				0		0	22.7552	18.7	23.7	25.8	0	0	0	0.1	0	0	0	1.5	0.1	0.3	0.1	0	0	0	0	0.2	0	0.7	0	0	0.9	0	1.4	CDC42 small effector 1	56882	protein_coding
ENSG00000213190	MLLT11			0					0				0		0	88.3497	57.4	78.3	129.4	0	2.2	0.2	0.2	0.3	0.3	1	0.2	0.3	1.5	1.1	0.2	0.4	0.3	0	0.1	0.1	0.2	0	1.8	1.5	0.9	0.2	myeloid/lymphoid or mixed-lineage leukemia (trithorax homolog, Drosophila); translocated to, 11	10962	protein_coding
ENSG00000143458	GABPB2			0					0				0		0	76.4461	50	71.7	107.6	0	0	0	0.1	0	0	2.4	0.2	0.2	0	0.7	0.3	0.1	1	0.2	0	0.1	0	0	0.7	1.8	0	0.2	GA binding protein transcription factor, beta subunit 2	126626	protein_coding
ENSG00000143434	SEMA6C			0					0			1.4	1		0	0	0	0	0	0	0	0	0	0	0	0	0	0	0	0	0	0	0	0	0	0	0.2	0.5	0	0.3	0.6	1.4	sema domain, transmembrane domain (TM), and cytoplasmic domain, (semaphorin) 6C	10500	protein_coding
ENSG00000163154	TNFAIP8L2			0					0			1.8	1		0	3.18804	2.2	5.7	1.6	0	0	0	0	0	0	0.3	0	0	0	0	0	0	0	0	0	0	0	0.3	0	0.3	1.8	0	tumor necrosis factor, alpha-induced protein 8-like 2	79626	protein_coding
ENSG00000163156	SCNM1			0					0			1721.5	6		0	29.7731	15.5	32.3	41.6	0	0	0	0.3	0	0.1	0.5	2.8	0	0	0	0.5	0	0	0	0.2	0.1	612.6	327.9	983.5	91.7	7159.4	1153.8	sodium channel modifier 1	79005	protein_coding
ENSG00000163155	LYSMD1			0					0				0		0	0.316618	0.2	0.5	0.3	0	0	0	0	0	0	0	0	0	0	0	0	0	0	0	0	0	0	0	0	0.6	0.3	0	LysM, putative peptidoglycan-binding, domain containing 1	388695	protein_coding
ENSG00000163157	TMOD4			0					0			1.8	1		0	3.8473	3.3	0.9	7.3	0	0	0	0	0	0	0	0	0	0	0	0	0	0	0	0	0	0.2	0	0.4	1.8	0	0	tropomodulin 4 (muscle)	29765	protein_coding
ENSG00000163159	VPS72			0					0				0		0	6.39156	4.7	5	9.5	0	0	0	0	0	0	0	0	0.1	0	0.2	0	0	0.1	0	0	0	0.2	1.5	0.4	0	0.3	0	vacuolar protein sorting 72 homolog (S. cerevisiae)	6944	protein_coding
ENSG00000143398	PIP5K1A			0					0				0		0	8.31335	7.9	6.4	10.6	0.3	0.8	0	0.1	0.1	0	0	1.2	0	0	0.4	0	0.1	0	0	0	0	0.2	0	1.4	0.3	0	0.2	phosphatidylinositol-4-phosphate 5-kinase, type I, alpha	8394	protein_coding
ENSG00000159352	PSMD4			0					0				0		0	0.949853	0.6	1.4	0.8	0	0	0	0	0	0	0	0	0	0	0	0	0	0	0	0	0	0.2	0	0	0.9	0	0.2	proteasome (prosome, macropain) 26S subunit, non-ATPase, 4	5710	protein_coding
ENSG00000232671	RP11-126K1.2			0					0				0		0	0	0	0	0	0	0	0	0	0	0	0	0	0	0	0	0	0	0	0	0	0	0.3	0	0	0	0	0	Uncharacterized protein	NA	protein_coding
ENSG00000143373	ZNF687			0					0			1.7	2		0	0	0	0	0	0	0	0	0	0	0	0	0	0	0	0	0	0	0	0	0	0	0.3	2.3	0.5	0.6	1.2	0.5	zinc finger protein 687	57592	protein_coding
ENSG00000143393	PI4KB			0					0			1.9	1		0	0.780478	1	0.2	1.1	0	0	0	0	0	0	0	0	0	0	0	0	0	0	0	0	0	0.5	0.3	0.4	0	0.3	1.9	phosphatidylinositol 4-kinase, catalytic, beta	5298	protein_coding
ENSG00000143390	RFX5			0					0				0		0	12.9376	11	14.2	13.6	0	0	0	0	0.2	0	0	0	0	0.2	0	0	0	0	0	0	0	0.2	0.3	0.2	0	0.3	0.2	regulatory factor X, 5 (influences HLA class II expression)	5993	protein_coding
ENSG00000143416	SELENBP1			0					0			39.5	1		0	12.746	10.8	13.1	14.4	0	0.1	0	0	0	0	0.2	0.5	0.1	0.2	0	0	0.1	0	0	0	0	0.5	0.3	39.5	0.6	0	0.5	selenium binding protein 1	8991	protein_coding
ENSG00000159377	PSMB4			0					0			1254.3	1		0	167.952	130	146.7	227.2	3.7	3.9	0.8	1.2	0.4	0.6	1.1	4.8	3.4	2	1.9	5.4	1.7	0.7	0.3	1.8	0.1	17	1254.3	23.2	12.8	4.5	7.5	proteasome (prosome, macropain) subunit, beta type, 4	5692	protein_coding
ENSG00000143442	POGZ			0					0				0		0	5.10151	4.7	3.6	7.1	0	0	0	0	0	0	0	0	0	0	0	0	0	0	0	0	0	0.3	0.3	0.2	0	0.6	1	pogo transposable element with ZNF domain	23126	protein_coding
ENSG00000143375	CGN			0					0			14.8	2		0	5.17918	4.5	6.2	4.9	0	0	0	0	0	0	0	0.3	0	0	0	0	0	0	0	0	0	0.8	0	0.2	27.5	0.6	2.2	cingulin	57530	protein_coding
ENSG00000143367	TUFT1			0					0				0		0	0.576924	0.2	0.7	0.8	0	0	0	0	0	0	0	0	0	0	0	0	0	0	0	0	0	0.3	0	0	0	0	0	tuftelin 1	7286	protein_coding
ENSG00000143376	SNX27			0					0			672	1		0	127.404	137.1	131.2	113.9	0.7	4.8	0.8	7.4	0.3	1.4	7.1	9.6	0.1	3.6	0.1	0.1	0.6	0.2	0	0.3	0.1	11.2	2.5	1.9	5.7	672	6.5	sorting nexin family member 27	81609	protein_coding
ENSG00000159409	CELF3			0					0				0		0	0	0	0	0	0	0.1	0	0	0	0	0	0	0	0	0	0	0	0	0	0	0	0	0	0.4	0.3	0	0.5	CUGBP, Elav-like family member 3	11189	protein_coding
ENSG00000178796	RIIAD1			0					0				0		0	3.58383	4.1	4.5	2.2	0	0	0	0	0	0	0	0	0	0	0	0	0	0	0	0	0	0	0	0	0	0	0	regulatory subunit of type II PKA R-subunit (RIIa) domain containing 1	284485	protein_coding
ENSG00000240510	AL589765.1			0					0			1.2	1		0	0	0	0	0	0	0	0	0	0	0	0	0	0	0	0	0	0	0	0	0	0	0.3	0	0.2	0	1.2	0	Uncharacterized protein; cDNA FLJ36032 fis, clone TESTI2017069	NA	protein_coding
ENSG00000143436	MRPL9			0					0			21	2		0	15.5387	14.8	15.2	16.6	0.1	0	0.2	0	0	0	2.3	0.3	0.4	1.2	0.5	0	0	0	0	0.1	0	36.5	0.5	0	3	5.4	1.9	mitochondrial ribosomal protein L9	65005	protein_coding
ENSG00000143450	OAZ3			0					0			1079.9	4		0	125.536	91.3	146.7	138.6	0.2	2.1	0	0.4	0.4	0.2	0.4	3.5	0.1	1.4	0.7	0.5	0.9	0.3	0.1	0.6	0.1	64.6	2.8	0.9	1451.1	1913.2	890.8	ornithine decarboxylase antizyme 3	51686	protein_coding
ENSG00000182134	TDRKH			0					0				0		0	38.974	35.2	36.1	45.7	0	0	0.2	0.1	0.9	0	0	0	1	0	0.1	0	0	0	0	0	0	0.8	0.5	1.8	0.6	0.3	2.6	tudor and KH domain containing	11022	protein_coding
ENSG00000213171	LINGO4			0					0				0		0	0	0	0	0	0	0	0	0	0	0	0	0	0	0	0	0	0	0	0	0	0	0.3	0	0	0.3	0.3	1	leucine rich repeat and Ig domain containing 4	339398	protein_coding
ENSG00000143365	RORC			0					0			389.2	5		0	1.77499	1.6	2.6	1.1	0	0	0	0	0	0	0	0	0	0	0	0	0	0	0	0.1	0	27.1	0.3	3.9	1729	141.7	44.5	RAR-related orphan receptor C	6097	protein_coding
ENSG00000225556	C2CD4D			0					0				0		0	0	0	0	0	0	0	0	0	0	0	0	0	0	0	0	0	0	0	0	0	0	0.3	0.3	0.5	0.3	0.3	0.2	C2 calcium-dependent domain containing 4D	100191040	protein_coding
ENSG00000196407	THEM5			0					0				0		0	0.689714	0.8	0.7	0.5	0	0	0	0	0	0	0	0	0	0	0	0	0	0	0	0	0	0	0	0.2	0	0	0	thioesterase superfamily member 5	284486	protein_coding
ENSG00000159445	THEM4			0					0				0		0	0	0	0	0	0	0	0	0	0	0	0	0	0	0	0	0	0	0	0	0	0	0.2	0	0	0	0	0	thioesterase superfamily member 4	117145	protein_coding
ENSG00000197747	S100A10			0					0				0		0	217.44	139.9	203.6	308.8	0.7	5	1.1	0.9	0.4	0.3	0.1	1.5	0.9	4.1	3.4	2.1	2.6	1.7	0.5	0.5	0.3	1.5	3	1.6	7.2	1.2	1.4	S100 calcium binding protein A10	6281	protein_coding
ENSG00000163191	S100A11			0					0				0		0	4.17201	2.4	7.4	2.7	0	0	0	0	0	0	0	0	0.2	0.2	0	0	0	0	0	0	0	0	0	0	0.3	0	0	S100 calcium binding protein A11	6282	protein_coding
ENSG00000182898	TCHHL1			0					0				0		0	0	0	0	0	0	0	0	0	0	0	0	0	0	0	0	0	0	0	0	0	0	0	0	0.4	0	0.3	0.2	trichohyalin-like 1	126637	protein_coding
ENSG00000159450	TCHH			0					0				0		0	0.758285	0.4	0.2	1.6	0	0.1	0	0	0	0	0	0	0	0	0	0	0	0	0	0	0	0.3	0.8	0.4	0.3	0.3	0.7	trichohyalin	7062	protein_coding
ENSG00000215853	RPTN			0					0				0		0	0	0	0	0	0	0	0	0	0	0	0	0	0	0	0	0	0	0	0	0	0	0.3	0	0	0	0	0.2	repetin	126638	protein_coding
ENSG00000197915	HRNR			0					0				0		0	1.53816	2.2	0.5	1.9	0	0.3	0	0	0	0	0	0	0.2	0	0	0	0	0	0	0	0	0.2	0.5	0.4	0.9	0.3	0	hornerin	388697	protein_coding
ENSG00000143631	FLG			0					0			1.3	1		0	0.226188	0.4	0	0.3	0	0	0	0	0	0	0	0	0	0	0	0	0	0	0	0	0	1.3	0.5	0.9	0.9	0.6	0.2	filaggrin	2312	protein_coding
ENSG00000143520	FLG2			0					0			1.2	1		0	0	0	0	0	0	0	0	0	0	0	0	0	0	0	0	0	0	0	0	0	0	0.5	0	0.2	1.2	0.6	0.7	filaggrin family member 2	388698	protein_coding
ENSG00000143536	CRNN			0					0				0		0	0.0791126	0	0.2	0	0	0	0	0	0	0	0	0	0	0	0	0	0	0	0	0	0	0	0.3	0	0	0	0	cornulin	49860	protein_coding
ENSG00000186207	LCE5A			0					0				0		0	0	0	0	0	0	0	0	0	0	0	0	0	0	0	0	0	0	0	0	0	0	0	0	0	0	0	0.5	late cornified envelope 5A	254910	protein_coding
ENSG00000169509	CRCT1			0					0				0		0	0	0	0	0	0	0	0	0	0	0	0	0	0	0	0	0	0	0	0	0	0	0	0	0	0	0	0	cysteine-rich C-terminal 1	54544	protein_coding
ENSG00000185966	LCE3E			0					0				0		0	0	0	0	0	0	0	0	0	0	0	0	0	0	0	0	0	0	0	0	0	0	0	0	0	0	0	0	late cornified envelope 3E	353145	protein_coding
ENSG00000163202	LCE3D			0					0				0		0	0	0	0	0	0	0	0	0	0	0	0	0	0	0	0	0	0	0	0	0	0	0	0	0	0	0	0	late cornified envelope 3D	84648	protein_coding
ENSG00000244057	LCE3C			0					0				0		0	0	0	0	0	0	0	0	0	0	0	0	0	0	0	0	0	0	0	0	0	0	0	0	0	0.3	0	0	late cornified envelope 3C	353144	protein_coding
ENSG00000187238	LCE3B			0					0				0		0	0	0	0	0	0	0	0	0	0	0	0	0	0	0	0	0	0	0	0	0	0	0	0	0	0	0	0	late cornified envelope 3B	353143	protein_coding
ENSG00000185962	LCE3A			0					0				0		0	0.0677956	0.2	0	0	0	0	0	0	0	0	0	0	0	0	0	0	0	0	0	0	0	0	0	0	0	0	0	late cornified envelope 3A	353142	protein_coding
ENSG00000187223	LCE2D			0					0				0		0	0	0	0	0	0	0	0	0	0	0	0	0	0	0	0	0	0	0	0	0	0	0	0	0	0	0	0	late cornified envelope 2D	353141	protein_coding
ENSG00000159455	LCE2B			0					0				0		0	0	0	0	0	0	0	0	0	0	0	0	0	0	0	0	0	0	0	0	0	0	0	0	0	0	0	0.2	late cornified envelope 2B	26239	protein_coding
ENSG00000187180	LCE2C			0					0				0		0	0	0	0	0	0	0	0	0	0	0	0	0	0	0	0	0	0	0	0	0	0	0	0	0.2	0	0	0	late cornified envelope 2C	353140	protein_coding
ENSG00000187173	LCE2A			0					0				0		0	0	0	0	0	0	0	0	0	0	0	0	0	0	0	0	0	0	0	0	0	0	0	0.5	0	0	0	0.2	late cornified envelope 2A	353139	protein_coding
ENSG00000187170	LCE4A			0					0				0		0	0	0	0	0	0	0	0	0	0	0	0	0	0	0	0	0	0	0	0	0	0	0	0	0	0	0	0	late cornified envelope 4A	199834	protein_coding
ENSG00000198854	C1orf68			0					0				0		0	0	0	0	0	0	0	0	0	0	0	0	0	0	0	0	0	0	0	0	0	0	0	0	0	0	0.3	0	chromosome 1 open reading frame 68	100129271	protein_coding
ENSG00000203786	KPRP			0					0				0		0	0	0	0	0	0	0	0	0	0	0	0	0	0	0	0	0	0	0	0	0	0	0	0	0	0	0	0	keratinocyte proline-rich protein	448834	protein_coding
ENSG00000240386	LCE1F			0					0				0		0	0	0	0	0	0	0	0	0	0	0	0	0	0	0	0	0	0	0	0	0	0	0	0	0	0	0	0	late cornified envelope 1F	353137	protein_coding
ENSG00000186226	LCE1E			0					0				0		0	0	0	0	0	0	0	0	0	0	0	0	0	0	0	0	0	0	0	0	0	0	0.2	0	0	0	0	0	late cornified envelope 1E	353135	protein_coding
ENSG00000172155	LCE1D			0					0				0		0	0	0	0	0	0	0	0	0	0	0	0	0	0	0	0	0	0	0	0	0	0	0	0	0	0	0	0	late cornified envelope 1D	353134	protein_coding
ENSG00000197084	LCE1C			0					0				0		0	0	0	0	0	0	0	0	0	0	0	0	0	0	0	0	0	0	0	0	0	0	0	0	0	0	0	0	late cornified envelope 1C	353133	protein_coding
ENSG00000196734	LCE1B			0					0				0		0	0	0	0	0	0	0	0	0	0	0	0	0	0	0	0	0	0	0	0	0	0	0	0	0	0	0	0	late cornified envelope 1B	353132	protein_coding
ENSG00000186844	LCE1A			0					0				0		0	0	0	0	0	0	0	0	0	0	0	0	0	0	0	0	0	0	0	0	0	0	0	0	0	0	0	0	late cornified envelope 1A	353131	protein_coding
ENSG00000235942	LCE6A			0					0				0		0	0	0	0	0	0	0	0	0	0	0	0	0	0	0	0	0	0	0	0	0	0	0.2	0	0	0	0	0	late cornified envelope 6A	448835	protein_coding
ENSG00000163206	SMCP			0					0				0		0	157.397	117.2	162.3	192.7	1.4	1.9	0.8	2.2	0.3	0	1.1	3.5	1.8	1.4	1.4	0.8	3.9	0.9	1	0.8	0.2	1.3	2.5	4.2	26.3	2.1	4.1	sperm mitochondria-associated cysteine-rich protein	4184	protein_coding
ENSG00000163207	IVL			0					0				0		0	0	0	0	0	0	0	0	0	0	0	0	0	0	0	0	0	0	0	0	0	0	0.2	0	0.2	0.3	0	0	involucrin	3713	protein_coding
ENSG00000184148	SPRR4			0					0				0		0	0.983972	0.2	1.7	1.1	0	0	0	0	0	0	0	0	0	0	0	0	0	0	0	0	0	0	0	0	0	0	0	small proline-rich protein 4	163778	protein_coding
ENSG00000169474	SPRR1A			0					0			1.4	1		0	2.14981	1.2	1.4	3.8	0	0	0	0	0	0	0	0	0	0	0	0	0	0	0	0	0	0.5	0	0	0	0	1.4	small proline-rich protein 1A	6698	protein_coding
ENSG00000163209	SPRR3			0					0				0		0	4.10555	3.9	3.6	4.9	0	0	0	0	0	0	0	0	0.1	0	0	0	0	0	0	0	0	0	0.5	0	0.3	0	0	small proline-rich protein 3	6707	protein_coding
ENSG00000169469	SPRR1B			0					0				0		0	0	0	0	0	0	0	0	0.1	0	0	0	0	0	0	0	0	0	0	0	0	0	0	0	0	0	0	0	small proline-rich protein 1B	6699	protein_coding
ENSG00000163216	SPRR2D			0					0				0		0	0.418532	0	0.7	0.5	0	0	0	0	0	0	0	0	0	0	0	0	0	0	0	0	0	0	0	0	0	0	0	small proline-rich protein 2D	6703	protein_coding
ENSG00000241794	SPRR2A			0					0				0		0	0.0677956	0.2	0	0	0	0	0	0	0	0	0	0	0	0	0	0	0	0	0	0	0	0	0	0	0	0	0	small proline-rich protein 2A	6700	protein_coding
ENSG00000196805	SPRR2B			0					0				0		0	0	0	0	0	0	0	0	0	0	0	0	0	0	0	0	0	0	0	0	0	0	0	0	0	0	0.3	0	small proline-rich protein 2B	6701	protein_coding
ENSG00000203785	SPRR2E			0					0				0		0	0.0905969	0	0	0.3	0	0	0	0	0	0	0	0	0	0	0	0	0	0	0	0	0	0	0	0	0	0	0	small proline-rich protein 2E	6704	protein_coding
ENSG00000244094	SPRR2F			0					0				0		0	0	0	0	0	0	0	0	0	0	0	0	0	0	0	0	0	0	0	0	0	0	0	0	0	0	0	0	small proline-rich protein 2F	6705	protein_coding
ENSG00000159516	SPRR2G			0					0				0		0	0.226021	0.2	0.5	0	0	0	0	0	0	0	0	0	0	0	0	0	0	0	0	0	0	0	0	0	0	0	0	small proline-rich protein 2G	6706	protein_coding
ENSG00000203784	LELP1			0					0				0		0	0.848715	0.2	0.7	1.6	0	0	0	0	0	0	0	0	0	0	0	0.1	0	0	0	0	0	0	0	0	0	0	0.2	late cornified envelope-like proline-rich 1	149018	protein_coding
ENSG00000203783	PRR9			0					0				0		0	0.293816	0.4	0.5	0	0	0	0	0	0	0	0	0	0	0	0	0	0	0	0	0	0	0	0	0	0	0	0	proline rich 9	574414	protein_coding
ENSG00000203782	LOR			0					0				0		0	0	0	0	0	0	0	0	0	0	0	0	0	0	0	0	0	0	0	0	0	0	0	0	0	0.3	0	0.2	loricrin	4014	protein_coding
ENSG00000159527	PGLYRP3			0					0				0		0	0	0	0	0	0	0	0	0	0	0	0	0	0	0	0	0	0	0	0	0	0	0	0	0.2	0	0	0.2	peptidoglycan recognition protein 3	114771	protein_coding
ENSG00000163218	PGLYRP4			0					0				0		0	0	0	0	0	0	0	0	0	0	0	0	0	0	0	0	0	0	0	0	0	0	0.2	0.3	0	0	0	0.2	peptidoglycan recognition protein 4	57115	protein_coding
ENSG00000163220	S100A9			0					0				0		0	0	0	0	0	0	0	0	0	0	0	0	0	0	0	0	0	0	0	0	0	0	0	0	0.2	0.3	0	0	S100 calcium binding protein A9	6280	protein_coding
ENSG00000163221	S100A12			0					0				0		0	0	0	0	0	0	0	0	0	0	0	0	0	0	0	0	0	0	0	0	0	0	0	0	0	0	0	0	S100 calcium binding protein A12	6283	protein_coding
ENSG00000143546	S100A8			0					0			38.1	2		0	45.1808	32.3	38	65.2	0.8	1.9	0	0.1	1.5	0.1	0.5	0.7	3	1.2	0.5	0	0.6	0.9	0	0.1	0	0.5	4.3	54.7	21.5	1.2	1.7	S100 calcium binding protein A8	6279	protein_coding
ENSG00000184330	S100A7A			0					0				0		0	0	0	0	0	0	0	0	0	0	0	0	0	0	0	0	0	0	0	0	0	0	0	0	0	0	0	0	S100 calcium binding protein A7A	338324	protein_coding
ENSG00000197364	S100A7L2			0					0				0		0	0.135591	0.4	0	0	0	0	0	0	0	0	0	0	0	0	0	0	0	0	0	0	0	0	0	0.2	0	0	0.2	S100 calcium binding protein A7-like 2	645922	protein_coding
ENSG00000143556	S100A7			0					0				0		0	0	0	0	0	0	0	0	0	0	0	0	0	0	0	0	0	0	0	0	0	0	0	0	0	0	0	0	S100 calcium binding protein A7	6278	protein_coding
ENSG00000196420	S100A5			0					0				0		0	0	0	0	0	0	0	0	0	0	0	0	0	0	0	0	0	0	0	0	0	0	0	0	0	0	0	0	S100 calcium binding protein A5	6276	protein_coding
ENSG00000196154	S100A4			0					0				0		0	27.487	19.1	26.1	37.2	0.1	0.1	0	0	0.1	0	0	1.8	1.7	1.9	0.4	0.1	0.1	0.8	0	0.1	0	0	3	0.2	3.3	0	0.7	S100 calcium binding protein A4	6275	protein_coding
ENSG00000188015	S100A3			0					0				0		0	0.214704	0.4	0.2	0	0	0	0	0	0	0	0	0	0	0	0	0	0	0	0	0	0	0	0	0	0	0.3	0	S100 calcium binding protein A3	6274	protein_coding
ENSG00000196754	S100A2			0					0			1.2	1		0	2.65849	2.2	1.7	4.1	0	0	0	0	0	0	0	0	0	0.3	0	0	0.4	0	0	0	0	1.2	0	0.4	0	0	0	S100 calcium binding protein A2	6273	protein_coding
ENSG00000188643	S100A16			0					0				0		0	0.226188	0.4	0	0.3	0	0	0	0	0	0	0	0	0	0	0	0	0	0	0	0	0	0	0	0	0	0	0	S100 calcium binding protein A16	140576	protein_coding
ENSG00000189334	S100A14			0					0				0		0	0	0	0	0	0	0	0	0	0	0	0	0	0	0	0	0	0	0	0	0	0	0.2	0.3	0.2	0.3	0	0	S100 calcium binding protein A14	57402	protein_coding
ENSG00000189171	S100A13			0					0				0		0	16.4264	11.2	12.8	25.3	0	0	0	0	0	0	0	0.7	0	0.2	0	0.5	0.1	0	0	0.1	0	1.2	1.5	1.8	2.4	0.3	0.7	S100 calcium binding protein A13	6284	protein_coding
ENSG00000160678	S100A1			0					0				0		0	0.260306	0	0.2	0.5	0	0	0	0	0	0	0	0.3	0	0	0	0	0	0	0	0	0	0	0	0	0	0	0.2	S100 calcium binding protein A1	6271	protein_coding
ENSG00000160679	CHTOP			0					0			2.4	1		0	8.02069	4.3	7.8	12	0	0	0	0	0	0	0	0	0	0.2	0.1	0	0.1	0	0	0.1	0	0	0	0	2.4	0	0	chromatin target of PRMT1	26097	protein_coding
ENSG00000143553	SNAPIN			0					0			13.5	2		0	19.8962	13.2	20.6	25.8	0	0.1	0.5	0.1	0	0.3	0.1	0	0	1.4	0.1	0	0.3	0.1	0	0	0	0.8	0	6.2	1.8	20.9	3.4	SNAP-associated protein	23557	protein_coding
ENSG00000143621	ILF2			0					0			304.5	1		0	493.996	360.2	501	620.8	4.8	12.1	1.4	6.4	1.3	0.9	3.4	4.8	1.3	5.8	15.2	0.1	1.6	0.4	0.5	1.6	0.1	12.2	0.8	1.4	19.1	1.2	304.5	interleukin enhancer binding factor 2	3608	protein_coding
ENSG00000169418	NPR1			0					0				0		0	0.362388	0	0	1.1	0	0	0	0	0	0	0	0	0	0	0	0	0	0	0	0	0	0.5	0	0.2	0.3	0	0.2	natriuretic peptide receptor A/guanylate cyclase A (atrionatriuretic peptide receptor A)	4881	protein_coding
ENSG00000143624	INTS3			0					0			4.3	1		0	7.84083	5.9	4	13.6	0	0	0	0	0	0	0	0	0	0	0.1	0	0	0	0	0	0	0.2	4.3	0.2	1.5	0	0	integrator complex subunit 3	65123	protein_coding
ENSG00000143554	SLC27A3			0					0			3.9	1		0	0.282499	0.6	0.2	0	0	0	0	0	0	0	0	0	0	0	0	0	0.1	0	0	0	0.1	0.5	0.3	3.9	0.3	0.3	0.2	solute carrier family 27 (fatty acid transporter), member 3	11000	protein_coding
ENSG00000143614	GATAD2B			0					0			2.7	1		0	3.32612	1	3.8	5.2	0.1	0.8	0	0	0	0	0	0	0.1	0	0	0	0	0	0	0	0	0	0	0.2	0	2.7	0	GATA zinc finger domain containing 2B	57459	protein_coding
ENSG00000198837	DENND4B			0					0			1.2	1		0	4.76037	5.7	4.5	4.1	0	0	0	0.1	0	0	0	0.2	0	0.2	0.1	0	0	0	0	0	0	0.5	0.5	0.2	0	1.2	0.2	DENN/MADD domain containing 4B	9909	protein_coding
ENSG00000160741	CRTC2			0					0				0		0	0	0	0	0	0	0	0	0	0	0	0	0	0	0	0	0	0	0	0	0	0	0.3	0	0.4	0	0	0.2	CREB regulated transcription coactivator 2	200186	protein_coding
ENSG00000143570	SLC39A1			0					0				0		0	6.35633	5.3	6.2	7.6	0	0	0	0.1	0	0	0	0.2	0	0	0	0	0	0.1	0	0	0	0	0	0	0	0	0.2	solute carrier family 39 (zinc transporter), member 1	27173	protein_coding
ENSG00000143578	CREB3L4			0					0			12.7	4		0	12.6449	12	10.4	15.5	0	0	0	0.3	0	0.1	0	2.8	0.1	0	0.5	0.6	0	0	0	0.2	0	26.8	0	0.9	5.1	9.4	9.6	cAMP responsive element binding protein 3-like 4	148327	protein_coding
ENSG00000143543	JTB			0					0				0		0	27.7696	15.3	31.1	37	0.2	0	0	0.1	0.1	0.1	0.1	1	0	0.3	0	0	0	1.4	0	0.2	0	0.3	0	0.2	1.5	1.2	0.7	jumping translocation breakpoint	10899	protein_coding
ENSG00000143545	RAB13			0					0			198.3	3		0	81.6667	56.7	81.2	107.1	0.3	1.3	0	0.1	1.1	0	0.3	2.1	1.7	2.6	0.9	0.7	0.3	0.6	0	0.2	0	11.2	3	1.9	181.1	264.6	149.3	RAB13, member RAS oncogene family	5872	protein_coding
ENSG00000177954	RPS27			0					0			38	5		0	12.0923	8.7	10.7	16.9	0	0	0	0	0	0	0	0.2	0	0.3	0	0	0	0	0	0.2	0	4.3	0	5.5	27.2	145.9	7.2	ribosomal protein S27	6232	protein_coding
ENSG00000143552	NUP210L			0					0				0		0	192.298	144.6	167.6	264.7	0.2	0	0	7	0.2	0.1	2.5	2.3	0.1	5.1	1.3	1.3	0.1	0.7	0	0	0	0.5	1	0.5	4.2	0.3	0.7	nucleoporin 210kDa-like	91181	protein_coding
ENSG00000143549	TPM3			0					0				0		0	33.4198	27.7	35.4	37.2	0.1	0.9	0.5	0	0.1	0	0.3	1.3	0.3	0.7	0.1	0.1	0.1	0.3	0	0.1	0.1	0.8	0	0.2	3.3	1.5	1.2	tropomyosin 3	7170	protein_coding
ENSG00000163263	C1orf189			0					0			19.3	3		0	11.3123	6.7	10.9	16.3	0	0	0	0	0	0	0	0	0	0	0.2	0.1	0	0	0	0	0	0.8	0	12.6	1.8	20.3	25	chromosome 1 open reading frame 189	388701	protein_coding
ENSG00000143612	C1orf43			0					0			95.7	4		0	30.6876	22.8	28.2	41	0	0	0	0.6	0	0.2	0	0	0	0	0.3	0	0	0	0	0	0	25.6	0.3	0.7	51.1	13.6	292.3	chromosome 1 open reading frame 43	25912	protein_coding
ENSG00000143569	UBAP2L			0					0			14.5	1		0	28.0604	19.7	31.6	32.9	0	0	0.5	0.1	0.2	0	0.4	1	0	2.2	0.2	0	0	0	0.1	0	0.1	14.5	0.3	0.2	3.9	0	2.6	ubiquitin associated protein 2-like	9898	protein_coding
ENSG00000143575	HAX1			0					0			268.9	1		0	240.679	166.6	257	298.4	2.3	5.5	0.9	1.7	0.6	0.9	1.4	11.2	0.9	4.3	1.9	0.3	1.2	0.3	0.3	0.7	0.1	268.9	12.9	34.2	20.3	9.1	26.4	HCLS1 associated protein X-1	10456	protein_coding
ENSG00000143595	AQP10			0					0				0		0	0	0	0	0	0	0	0	0	0	0	0	0	0	0	0	0	0	0	0	0	0	0	0	0	0	0.3	0.2	aquaporin 10	89872	protein_coding
ENSG00000143515	ATP8B2			0					0				0		0	0	0	0	0	0	0	0	0	0	0	0	0	0	0	0	0	0	0	0	0	0	0	0	0.5	0	0	0.7	ATPase, aminophospholipid transporter, class I, type 8B, member 2	57198	protein_coding
ENSG00000160712	IL6R			0					0			11	2		0	0.883168	0.2	0	2.4	0.2	0	0	0	0	0	0	0	0	0	0	0	0	0	0	0	0	0.2	0.3	0	0	19.1	2.9	interleukin 6 receptor	3570	protein_coding
ENSG00000169291	SHE			0					0			73.3	3		0	0.0791126	0	0.2	0	0	0	0	0	0	0	0	0	0	0	0	0	0	0	0	0	0	3.6	0.3	0.4	0	111.1	105	Src homology 2 domain containing E	126669	protein_coding
ENSG00000163239	TDRD10			0					0			17.8	1		0	16.379	12.6	14.2	22.3	0	0	0	0.1	0.1	0	0	1.3	0.1	0.2	2.6	0	0.6	0	0	0.2	0	2.5	17.8	1.1	1.5	2.4	0.7	tudor domain containing 10	126668	protein_coding
ENSG00000160714	UBE2Q1			0					0				0		0	251.793	191	240.4	324	0	4.6	0.2	0.7	0.2	0.8	1.7	7.9	2.3	2.4	1.9	0.5	0.4	0.8	0.3	0.9	0.2	4.5	1	27.3	6	32.7	36.1	ubiquitin-conjugating enzyme E2Q family member 1	55585	protein_coding
ENSG00000160716	CHRNB2			0					0				0		0	0	0	0	0	0	0	0	0	0	0	0	0	0	0	0	0	0	0	0	0	0	0.3	0	0.4	0	0	0	cholinergic receptor, nicotinic, beta 2 (neuronal)	1141	protein_coding
ENSG00000160710	ADAR			0					0				0		0	14.7043	13.4	11.4	19.3	0	0	0	0	0	0	0	0	0	0	0	0	0	0	0	0	0	0.7	0	0.4	0.6	0.3	0.7	adenosine deaminase, RNA-specific	103	protein_coding
ENSG00000268141	AL606500.1			0					0				0		0	0.203387	0.6	0	0	0	0	0	0	0	0	0.1	0	0	0	0	0	0	0	0	0	0	0	0	0	0	0	0		NA	protein_coding
ENSG00000143603	KCNN3			0					0				0		0	0	0	0	0	0	0	0	0	0	0	0	0	0	0	0	0	0	0	0	0	0	0.5	0	0.2	0.3	0	0.5	potassium intermediate/small conductance calcium-activated channel, subfamily N, member 3	3782	protein_coding
ENSG00000163344	PMVK			0					0				0		0	0	0	0	0	0	0	0	0	0	0	0	0	0	0	0	0	0	0	0	0	0	0.2	0	0	0	0	0	phosphomevalonate kinase	10654	protein_coding
ENSG00000163346	PBXIP1			0					0				0		0	0.0905969	0	0	0.3	0	0	0	0	0	0	0	0	0.1	0	0	0	0	0	0	0	0	0.2	0.3	0	0.3	0.6	0.5	pre-B-cell leukemia homeobox interacting protein 1	57326	protein_coding
ENSG00000163348	PYGO2			0					0				0		0	0	0	0	0	0	0	0	0	0	0	0	0	0	0	0	0	0	0	0	0	0	0.2	0.3	0	0.6	0	0	pygopus family PHD finger 2	90780	protein_coding
ENSG00000160691	SHC1			0					0				0		0	0.0791126	0	0.2	0	0	0	0	0	0	0	0	0	0	0	0	0	0	0	0	0	0	0.5	0	0.2	0.3	0.3	0.7	SHC (Src homology 2 domain containing) transforming protein 1	6464	protein_coding
ENSG00000173207	CKS1B			0					0				0		0	10.5182	6.3	13.3	12	0.1	0.3	0	0.1	0.1	0	0	0	0	0	0	0.1	0	0.1	0	0	0	0.3	0.3	0.2	2.1	0	0.2	CDC28 protein kinase regulatory subunit 1B	1163	protein_coding
ENSG00000160688	FLAD1			0					0				0		0	1.47124	0	1.4	3	0	0	0	0	0	0	0	0	0	0.2	0	0	0	0	0	0	0	0.5	0.5	0.5	0	0.6	0.2	flavin adenine dinucleotide synthetase 1	80308	protein_coding
ENSG00000163352	LENEP			0					0				0		0	0	0	0	0	0	0	0	0	0	0	0	0	0	0	0	0	0	0	0	0	0	0.2	0	0	0	0	0	lens epithelial protein	55891	protein_coding
ENSG00000160685	ZBTB7B			0					0			1.2	1		0	0	0	0	0	0	0	0	0	0	0	0	0	0	0	0	0	0	0	0	0	0	0	0	0.4	1.2	0.3	0	zinc finger and BTB domain containing 7B	51043	protein_coding
ENSG00000163354	DCST2			0					0				0		0	0	0	0	0	0	0	0	0	0	0	0	0	0	0	0	0	0	0	0	0	0	0	0	0.2	0	0	0.2	DC-STAMP domain containing 2	127579	protein_coding
ENSG00000163357	DCST1			0					0				0		0	0	0	0	0	0	0	0	0	0	0	0	0	0	0	0	0	0	0	0	0	0	0.3	0.3	0	0	0	0.2	DC-STAMP domain containing 1	149095	protein_coding
ENSG00000143537	ADAM15			0					0			1.2	1		0	0	0	0	0	0	0	0	0	0	0	0	0	0	0	0	0	0	0	0	0	0	0	0.8	0.2	0.3	0	1.2	ADAM metallopeptidase domain 15	8751	protein_coding
ENSG00000243364	EFNA4			0					0				0		0	0.0905969	0	0	0.3	0	0	0	0	0	0	0	0	0	0	0	0	0	0	0	0	0	0	0.3	0.2	0	0	0	ephrin-A4	1945	protein_coding
ENSG00000143590	EFNA3			0					0				0		0	0	0	0	0	0	0	0	0	0	0	0	0	0	0	0	0	0	0	0	0	0	0	0	0	0	0	0	ephrin-A3	1944	protein_coding
ENSG00000251246	EFNA3			0					0				0		0	0	0	0	0	0	0	0	0	0	0	0	0	0	0	0	0	0	0	0	0	0	0	0	0	0	0	0	Ephrin-A3; Uncharacterized protein; cDNA FLJ57652, highly similar to Ephrin-A3	NA	protein_coding
ENSG00000169242	EFNA1			0					0			17.9	4		0	13.84	11.4	19	11.1	0	0	0	0.4	0	1.1	0	0.2	0.4	0	0	0	0	0.3	0	0	0	8.4	0	2.5	11.1	12.4	39.9	ephrin-A1	1942	protein_coding
ENSG00000169241	SLC50A1			0					0				0		0	0.260306	0	0.2	0.5	0	0	0	0	0	0	0	0	0	0	0	0	0	0	0	0	0	0.2	0	0.4	0.3	0	0.5	solute carrier family 50 (sugar efflux transporter), member 1	55974	protein_coding
ENSG00000179085	DPM3			0					0				0		0	0	0	0	0	0	0	0	0	0	0	0	0	0	0	0	0	0	0	0	0	0	0	0	0	0	0	0	dolichyl-phosphate mannosyltransferase polypeptide 3	54344	protein_coding
ENSG00000163463	KRTCAP2			0					0				0		0	0.158225	0	0.5	0	0	0	0	0	0	0	0	0	0	0	0	0	0	0	0	0	0	0	0	0	0	0	0	keratinocyte associated protein 2	200185	protein_coding
ENSG00000273088	RP11-201K10.3			0					0				0		0	0	0	0	0	0	0	0	0	0	0	0	0	0	0	0	0	0	0	0	0	0	0	0	0	0	0	0		NA	protein_coding
ENSG00000163462	TRIM46			0					0				0		0	0	0	0	0	0	0	0	0	0	0	0	0	0	0	0	0	0	0	0	0	0	0.3	0.3	0	0	0	0.5	tripartite motif containing 46	80128	protein_coding
ENSG00000185499	MUC1			0					0			18.7	2		0	31.4843	26.4	35.1	32.9	0	0	0	0.4	0	0	0	0.8	0	0.5	0	0	0	0	0	0.2	0	4.3	0	0	3	26.6	10.8	mucin 1, cell surface associated	4582	protein_coding
ENSG00000173171	MTX1			0					0				0		0	0.248822	0	0.5	0.3	0	0	0	0	0	0	0	0	0	0	0	0	0	0	0	0	0	0	0.3	0	0	0	0	metaxin 1	4580	protein_coding
ENSG00000177628	GBA			0					0				0		0	7.16043	2.4	9.3	9.8	0	0	0	0	0	0	0	0	0	0	0	0	0	0	0	0	0	0	0	0.2	1.5	0	0	glucosidase, beta, acid	2629	protein_coding
ENSG00000160767	FAM189B			0					0				0		0	0	0	0	0	0	0	0	0	0	0	0	0	0	0	0	0	0	0	0	0	0	0	0.3	0	0	0	0.2	family with sequence similarity 189, member B	10712	protein_coding
ENSG00000116521	SCAMP3			0					0			77.6	4		0	16.2632	16.1	14.2	18.5	0.5	0	0.2	0	0.1	0	0.1	0.2	0.2	0.3	0.2	0	0	0.3	0.1	0	0	30.7	0.5	12.4	238.8	28.5	0.5	secretory carrier membrane protein 3	10067	protein_coding
ENSG00000176444	CLK2			0					0				0		0	118.032	72.8	127.5	153.8	0	3.5	0.2	0	0.2	0.1	1.1	0.5	0.2	1.4	0.3	0.1	0.3	0.9	0	0.1	0.1	1.2	2	0.2	4.2	1.5	16.3	CDC-like kinase 2	1196	protein_coding
ENSG00000143630	HCN3			0					0				0		0	0	0	0	0	0	0	0	0	0	0	0	0	0	0	0	0	0	0	0	0	0	0	0	0.4	0	0	0	hyperpolarization activated cyclic nucleotide-gated potassium channel 3	57657	protein_coding
ENSG00000143627	PKLR			0					0				0		0	0.237338	0	0.7	0	0	0	0	0	0	0	0	0	0	0	0	0	0	0	0	0	0	0	0	0	0	0.6	0.2	pyruvate kinase, liver and RBC	5313	protein_coding
ENSG00000160752	FDPS			0					0				0		0	295.107	243.5	320.9	321	0.5	4.6	0.3	1.8	1.3	0.5	1.2	8.6	0.8	5.1	2.6	0	0.6	1	0.4	0.5	0.7	5.8	0.8	10.1	19.1	18.5	3.4	farnesyl diphosphate synthase	2224	protein_coding
ENSG00000160753	RUSC1			0					0			1.4	2		0	2.00229	1.8	1.2	3	0	0	0	0	0	0	0	0.2	0	0	0	0	0	0	0	0	0	0.2	0	0	1.5	1.2	0.2	RUN and SH3 domain containing 1	23623	protein_coding
ENSG00000125459	MSTO1			0					0				0		0	43.4338	29.1	46	55.2	0	2.3	0	0	0.4	0	0	0	0.1	1	0.9	0.2	0.1	0.1	0	0.2	0.1	0.8	0.5	1.2	2.1	0	5	misato 1, mitochondrial distribution and morphology regulator	55154	protein_coding
ENSG00000163374	YY1AP1			0					0				0		0	149.263	113.7	153.1	181	0.5	0.8	0.6	0.5	0.6	0.3	2.1	1.6	0.7	4.6	0.3	0.2	0	0.1	0.1	0.8	0.2	1.2	0.8	3.2	8.7	3.6	14.7	YY1 associated protein 1	55249	protein_coding
ENSG00000132676	DAP3			0					0			228.6	1		0	361.189	327.5	374.5	381.6	0.8	4.9	0.2	4.9	0.8	0.7	2.2	1.3	2	4.6	2.8	1	0.6	0.5	0.5	0.8	0.1	13.9	58.6	228.6	7.5	1.5	15.1	death associated protein 3	7818	protein_coding
ENSG00000116580	GON4L			0					0				0		0	100.205	72.4	114.9	113.3	0	1.2	0.8	0	0	0	8.5	1.3	1.1	0.3	0.5	0	0	0	0.1	0.5	0	1.3	0	1.4	3	3.6	1.7	gon-4-like (C. elegans)	54856	protein_coding
ENSG00000132718	SYT11			0					0				0		0	1.38064	0	1.4	2.7	0	0	0	0	0	0	0	0	0	0	0	0	0	0	0	0	0	0.2	0	0.7	0	0	0	synaptotagmin XI	23208	protein_coding
ENSG00000143622	RIT1			0					0				0		0	42.0091	32.9	55.3	37.8	0.2	0	0	0.9	0	0	0	3.6	1.1	0.2	0.3	0	0	0	0	0.1	0	0	0	0	2.7	0	0	Ras-like without CAAX 1	6016	protein_coding
ENSG00000132680	KIAA0907			0					0				0		0	31.6143	35.6	33.7	25.5	0	0.5	1.1	2.2	0.1	0	0.2	1.2	0.1	0.5	1.2	0.1	0	0.2	0.1	0	0.1	4.1	0.8	0.5	2.7	0.3	0.2	KIAA0907	22889	protein_coding
ENSG00000173080	RXFP4			0					0				0		0	0	0	0	0	0	0	0	0	0	0	0	0	0	0	0	0	0	0	0	0	0	0	0.3	0	0.3	0	0.2	relaxin/insulin-like family peptide receptor 4	339403	protein_coding
ENSG00000116584	ARHGEF2			0					0				0		0	0.146908	0.2	0.2	0	0	0	0	0	0	0	0	0	0	0	0	0	0	0	0	0	0	0	0.5	0	0.6	0	0.2	Rho/Rac guanine nucleotide exchange factor (GEF) 2	9181	protein_coding
ENSG00000163479	SSR2			0					0			309.1	5		0	226.752	173.1	230.2	277	0.2	2.7	0.3	0.8	0.7	0.2	1	7.4	1.7	5.3	1.3	1.2	0.9	0.3	0.2	0.5	0.3	335.4	2.3	149.1	164.7	508.9	387.7	signal sequence receptor, beta (translocon-associated protein beta)	6746	protein_coding
ENSG00000160803	UBQLN4			0					0				0		0	0.4415	0	0.2	1.1	0	0	0	0	0.1	0	0	0	0	0	0	0	0	0	0	0	0	0.2	0	0.2	0	0	0.7	ubiquilin 4	56893	protein_coding
ENSG00000116586	LAMTOR2			0					0			2.2	1		0	3.25744	2.8	2.8	4.1	0.3	0	0	0.1	0	0	0	0	0	0	0	0	0	0	0	0	0	0	0	0.2	0	0	2.2	late endosomal/lysosomal adaptor, MAPK and MTOR activator 2	28956	protein_coding
ENSG00000132698	RAB25			0					0				0		0	1.19962	0.2	0.9	2.4	0	0	0	0	0	0	0	0	0	0.7	0.2	0	0	0	0	0	0	0.2	0	0	0	0.6	0	RAB25, member RAS oncogene family	57111	protein_coding
ENSG00000254726	MEX3A			0					0				0		0	0	0	0	0	0	0	0	0	0	0	0	0	0	0	0	0	0	0	0	0	0	0	0.5	0	0.6	0.6	0	mex-3 RNA binding family member A	92312	protein_coding
ENSG00000160789	LMNA			0					0				0		0	0.0791126	0	0.2	0	0	0	0	0	0	0	0	0	0	0	0	0	0	0	0	0	0	0.5	0.3	0	0	0.3	0.5	lamin A/C	4000	protein_coding
ENSG00000196189	SEMA4A			0					0				0		0	0	0	0	0	0	0	0	0	0	0	0	0	0	0	0	0	0	0	0	0	0	0	0.3	0	0.9	0.6	0.2	sema domain, immunoglobulin domain (Ig), transmembrane domain (TM) and short cytoplasmic domain, (semaphorin) 4A	64218	protein_coding
ENSG00000160785	SLC25A44			0					0				0		0	0.158225	0	0.5	0	0	0	0	0	0	0	0	0	0	0	0	0	0	0	0	0	0	0	0	0	0	0	0	solute carrier family 25, member 44	9673	protein_coding
ENSG00000260238	PMF1-BGLAP			0					0				0		0	0	0	0	0	0	0	0	0	0	0	0	0	0	0	0	0	0	0	0	0	0	0	0	0	0	0	0	PMF1-BGLAP readthrough	100527963	protein_coding
ENSG00000160783	PMF1			0					0				0		0	0	0	0	0	0	0	0	0	0	0	0	0	0	0	0	0	0	0	0	0	0	0.2	0	0	0	0	0.2	polyamine-modulated factor 1	11243	protein_coding
ENSG00000242252	BGLAP			0					0				0		0	0.509296	0.2	0.2	1.1	0	0	0	0	0	0	0	0	0	0	0	0	0	0	0	0	0	0	0	0	0	0	0	bone gamma-carboxyglutamate (gla) protein	632	protein_coding
ENSG00000160781	PAQR6			0					0				0		0	0	0	0	0	0	0	0	0	0	0	0	0	0	0	0	0	0	0	0	0	0	0.3	0.3	0	0	0	0	progestin and adipoQ receptor family member VI	79957	protein_coding
ENSG00000198952	SMG5			0					0			2.2	1		0	0	0	0	0	0	0	0	0	0	0	0	0	0	0	0	0	0	0	0	0	0	0.2	0	0.2	0.3	0.6	2.2	SMG5 nonsense mediated mRNA decay factor	23381	protein_coding
ENSG00000163472	TMEM79			0					0				0		0	0	0	0	0	0	0	0	0	0	0	0	0	0	0	0	0	0	0	0	0	0	0	0	0	0	0.3	0	transmembrane protein 79	84283	protein_coding
ENSG00000198715	C1orf85			0					0			2.7	1		0	1.00711	0.4	0.7	1.9	0	0	0	0	0	0	0	0	0	0	0	0	0	0	0	0	0	0	0.3	0	2.7	0	0	chromosome 1 open reading frame 85	112770	protein_coding
ENSG00000189030	VHLL			0					0				0		0	0	0	0	0	0	0	0	0	0	0	0	0	0	0	0	0	0	0	0	0	0	0	0	0	0	0	0	von Hippel-Lindau tumor suppressor-like	391104	protein_coding
ENSG00000163468	CCT3			0					0			58.4	2		0	114.557	70.8	110.4	162.5	0.2	0.4	0	0	0	0.1	0	0.3	0	0.7	0	0.1	1.3	0	0	0	0	27.8	62.6	54.2	2.1	3	2.9	chaperonin containing TCP1, subunit 3 (gamma)	7203	protein_coding
ENSG00000163467	TSACC			0					0				0		0	90.2016	59.4	67.2	144	1.1	0.8	0.8	0.5	1	1.5	0.4	12.7	0.2	4.1	1.2	0.9	1.2	0.3	0	0.9	0	2.6	0.3	17.5	11.4	3.3	4.1	TSSK6 activating co-chaperone	128229	protein_coding
ENSG00000132677	RHBG			0					0				0		0	0.0677956	0.2	0	0	0	0	0	0	0	0	0	0	0	0	0	0	0	0	0	0	0	0	0.3	0	0.3	0.3	0	Rh family, B glycoprotein (gene/pseudogene)	57127	protein_coding
ENSG00000125462	C1orf61			0					0			111.6	4		0	11.0623	5.3	13.8	14.1	0	1.2	0	0.1	0	0	0.1	1.3	0	0.2	0.1	0.1	0.3	0.1	0.1	0.1	0.1	53.1	323.3	0.2	3	0	67.1	chromosome 1 open reading frame 61	10485	protein_coding
ENSG00000116604	MEF2D			0					0				0		0	0	0	0	0	0.1	0	0	0	0	0	0	0	0	0	0	0	0	0	0	0	0	0.3	0	0.5	0	0	0	myocyte enhancer factor 2D	4209	protein_coding
ENSG00000183856	IQGAP3			0					0				0		0	0.226021	0.2	0.5	0	0	0	0	0	0	0	0	0	0	0	0	0	0	0	0	0	0	0.3	0.3	0.2	0.6	0.3	0.2	IQ motif containing GTPase activating protein 3	128239	protein_coding
ENSG00000187862	TTC24			0					0				0		0	0	0	0	0	0	0	0	0	0	0	0	0	0	0	0	0	0	0	0	0	0	0	0	0	0.3	0.3	0.5	tetratricopeptide repeat domain 24	164118	protein_coding
ENSG00000163382	APOA1BP			0					0			58.7	2		0	24.0011	19.3	22.8	29.9	0	0	0	0	0	0	0.4	1.3	0.1	0.2	0.1	0	0	0	0	0.2	0.1	5	0	2.7	68.7	48.7	1.2	apolipoprotein A-I binding protein	128240	protein_coding
ENSG00000160818	GPATCH4			0					0				0		0	15.8678	11.6	17.8	18.2	0	0	0	0	0	0	0.1	0.3	0.1	0.3	0.1	0.1	0.3	0	0	0	0	0	0	0	0.9	1.8	1	G patch domain containing 4	54865	protein_coding
ENSG00000132702	HAPLN2			0					0				0		0	0	0	0	0	0	0	0	0	0	0	0	0	0	0	0	0	0	0	0	0	0	0	0	0	0	0	0	hyaluronan and proteoglycan link protein 2	60484	protein_coding
ENSG00000132692	BCAN			0					0			1.2	1		0	0	0	0	0	0	0	0	0	0	0	0	0	0	0	0	0	0	0	0	0	0	1.2	0.3	0	0	0	0	brevican	63827	protein_coding
ENSG00000132688	NES			0					0			1.2	1		0	0.293984	0.6	0	0.3	0	0	0	0	0	0	0	0	0	0	0	0	0	0	0	0	0	0.7	0	0.4	0.9	0.3	1.2	nestin	10763	protein_coding
ENSG00000143320	CRABP2			0					0				0		0	0	0	0	0	0	0	0	0	0	0	0	0	0	0	0	0	0	0	0	0	0	0	0	0	0	0	0.2	cellular retinoic acid binding protein 2	1382	protein_coding
ENSG00000143319	ISG20L2			0					0			293.5	5		0	35.9818	27.5	31.6	48.9	0	7.4	0	0.3	0	0	0.9	1	0.2	0.2	1.1	0	0.1	0	0.5	0	0	63.3	88.5	240.1	313.8	761.7	3.8	interferon stimulated exonuclease gene 20kDa-like 2	81875	protein_coding
ENSG00000143303	RRNAD1			0					0				0		0	2.31918	0.8	2.6	3.5	0	0	0	0	0	0	0	0	0	0	0	0	0	0	0	0	0	0	0.3	0	0	0	0	ribosomal RNA adenine dimethylase domain containing 1	51093	protein_coding
ENSG00000143314	MRPL24			0					0				0		0	78.1851	54.5	90.9	89.1	0	0	0.5	1	0.3	0	0.4	3	1.4	2.9	2.2	0.1	0.4	0.6	0.2	0.8	0.3	9.4	4.8	3.9	1.8	18.5	1.7	mitochondrial ribosomal protein L24	79590	protein_coding
ENSG00000143321	HDGF			0					0				0		0	0.588576	0.4	0	1.4	0.1	0	0	0	0	0	0	0	0	0	0	0	0	0	0	0	0	0.2	0.3	0	0.3	0	0.5	hepatoma-derived growth factor	3068	protein_coding
ENSG00000143294	PRCC			0					0			20.1	2		0	11.1773	7.1	9	17.4	0	0	0	0	0	0	0	0.2	0	0.2	0	0.3	0	0	0	0	0	35.9	0.5	1.2	0.3	0.6	4.3	papillary renal cell carcinoma (translocation-associated)	5546	protein_coding
ENSG00000027869	SH2D2A			0					0				0		0	0.0677956	0.2	0	0	0	0	0	0	0	0	0	0	0	0	0	0	0	0	0	0	0	0.3	0	0.2	0.3	0	0.5	SH2 domain containing 2A	9047	protein_coding
ENSG00000198400	NTRK1			0					0				0		0	0	0	0	0	0	0	0	0	0	0	0	0	0	0	0	0	0	0	0	0	0	0.3	0.3	0.5	0.3	0.3	0	neurotrophic tyrosine kinase, receptor, type 1	4914	protein_coding
ENSG00000027644	INSRR			0					0				0		0	0	0	0	0	0	0	0	0	0	0	0	0	0	0	0	0	0	0	0	0	0	0.3	0	0.2	0.3	0.9	0.7	insulin receptor-related receptor	3645	protein_coding
ENSG00000187800	PEAR1			0					0				0		0	0.0791126	0	0.2	0	0	0	0	0	0	0	0	0	0	0	0	0	0	0	0	0	0	0.2	0.5	0.2	0.3	0.3	0.5	platelet endothelial aggregation receptor 1	375033	protein_coding
ENSG00000160838	LRRC71			0					0			1.4	3		0	3.66432	2.6	4.3	4.1	0.5	0	0	0	0	0	0	0	0	0	0	0	0	0	0	0	0	1.5	0	1.2	0.9	0.3	1.4	leucine rich repeat containing 71	149499	protein_coding
ENSG00000132694	ARHGEF11			0					0				0		0	0	0	0	0	0	0.3	0	0.2	0	0	0	0.2	0	0	0	0	0	0	0	0	0.1	0.3	0.5	0.4	0.6	0.6	0.5	Rho guanine nucleotide exchange factor (GEF) 11	9826	protein_coding
ENSG00000253831	ETV3L			0					0			1.5	1		0	0.0677956	0.2	0	0	0	0	0	0	0	0	0	0	0	0	0	0	0	0	0	0	0	0.2	0.5	0.2	0	1.5	0.2	ets variant 3-like	440695	protein_coding
ENSG00000117036	ETV3			0					0				0		0	0	0	0	0	0	0	0	0	0	0	0	0	0	0	0	0	0	0	0	0	0	0	0.3	0	0	0	0	ets variant 3	2117	protein_coding
ENSG00000143297	FCRL5			0					0				0		0	0.565607	0.4	0.5	0.8	0	0	0	0	0	0	0	0	0	0	0	0	0	0	0	0	0	0.7	0	0	0.3	0.3	0.7	Fc receptor-like 5	83416	protein_coding
ENSG00000163518	FCRL4			0					0				0		0	0	0	0	0	0	0	0	0	0	0	0	0	0	0	0	0	0	0	0	0	0	0	0.3	0.4	0.3	0	0	Fc receptor-like 4	83417	protein_coding
ENSG00000160856	FCRL3			0					0				0		0	22.1863	22.2	23.7	20.7	0.1	0	0.5	0.1	0	0	0	0.5	0	0	0.2	0	0	0.2	0	0.2	0.1	0.3	0.3	0	1.8	0.9	0.2	Fc receptor-like 3	115352	protein_coding
ENSG00000132704	FCRL2			0					0				0		0	10.0066	11	11.2	7.9	0.3	0	0	0	0	0.2	0	0	0	0	0	0	0	0	0	0	0	0.2	0	0.4	0.6	0	0.2	Fc receptor-like 2	79368	protein_coding
ENSG00000163534	FCRL1			0					0				0		0	0.542365	1.6	0	0	0	0	0	0	0	0	0	0	0	0	0	0	0	0	0	0	0	0	0.3	0	0.3	0	0.2	Fc receptor-like 1	115350	protein_coding
ENSG00000073754	CD5L			0					0				0		0	0	0	0	0	0	0	0	0	0	0	0	0	0	0	0	0	0	0	0	0	0	0	0.3	0.2	0	0.3	0	CD5 molecule-like	922	protein_coding
ENSG00000183853	KIRREL			0					0				0		0	0	0	0	0	0	0	0	0	0	0	0	0	0	0	0	0	0	0	0	0	0	0	0.8	0	0.3	0	0	kin of IRRE like (Drosophila)	55243	protein_coding
ENSG00000158473	CD1D			0					0				0		0	3.92352	2.8	5.9	3	0	0	0	0	0.1	0	0	0	0	0.3	0	0	0	0	0	0	0	0	0	0.5	0	0.6	0.5	CD1d molecule	912	protein_coding
ENSG00000158477	CD1A			0					0				0		0	0.16971	0	0.2	0.3	0	0	0	0.1	0	0	0	0.2	0	0	0	0	0	0	0	0	0	0	0	0	0	0.6	0	CD1a molecule	909	protein_coding
ENSG00000158481	CD1C			0					0			384.2	3		0	70.552	48.2	98.5	65	0.3	0	0	2.4	0	0	0	5.6	2.2	0.2	0.3	0	0	0	0.1	0.2	0	362.3	163.3	627	1.5	0.3	0.5	CD1c molecule	911	protein_coding
ENSG00000158485	CD1B			0					0				0		0	0.271791	0	0	0.8	0	0	0	0	0	0	0	0	0	0	0	0	0	0	0	0	0	0.2	0.3	0.2	0	0	0.2	CD1b molecule	910	protein_coding
ENSG00000158488	CD1E			0					0				0		0	12.3825	14	11.2	12	0.8	0	0	0.3	0	0	0	0.5	0	1.2	0	0	0	0	0	0	0	0	0	0.7	0	0.9	1	CD1e molecule	913	protein_coding
ENSG00000186306	OR10T2			0					0				0		0	0	0	0	0	0	0	0	0	0	0	0	0	0	0	0	0	0	0	0	0	0	0	0	0	0	0	0.2	olfactory receptor, family 10, subfamily T, member 2	128360	protein_coding
ENSG00000180708	OR10K2			0					0				0		0	0	0	0	0	0	0	0	0	0	0	0	0	0	0	0	0	0	0	0	0	0	0	0.3	0.2	0	0	0	olfactory receptor, family 10, subfamily K, member 2	391107	protein_coding
ENSG00000173285	OR10K1			0					0				0		0	0	0	0	0	0	0	0	0	0	0	0	0	0	0	0	0	0	0	0	0	0	0	0	0	0	0	0	olfactory receptor, family 10, subfamily K, member 1	391109	protein_coding
ENSG00000198965	OR10R2			0					0				0		0	0	0	0	0	0	0	0	0	0	0	0	0	0	0	0	0	0	0	0	0	0	0	0	0	0	0.3	0	olfactory receptor, family 10, subfamily R, member 2	343406	protein_coding
ENSG00000197532	OR6Y1			0					0				0		0	0	0	0	0	0	0	0	0	0	0	0	0	0	0	0	0	0	0	0	0	0	0	0	0	0	0	0	olfactory receptor, family 6, subfamily Y, member 1	391112	protein_coding
ENSG00000186440	OR6P1			0					0				0		0	0	0	0	0	0	0	0	0	0	0	0	0	0	0	0	0	0	0	0	0	0	0	0	0	0	0	0.2	olfactory receptor, family 6, subfamily P, member 1	128366	protein_coding
ENSG00000186400	OR10X1			0					0				0		0	0	0	0	0	0	0	0	0	0	0	0	0	0	0	0	0	0	0	0	0	0	0	0.5	0	0	0	0.2	olfactory receptor, family 10, subfamily X, member 1 (gene/pseudogene)	128367	protein_coding
ENSG00000198967	OR10Z1			0					0				0		0	0	0	0	0	0	0	0	0	0	0	0	0	0	0	0	0	0	0	0	0	0	0	0	0	0.3	0.3	0	olfactory receptor, family 10, subfamily Z, member 1	128368	protein_coding
ENSG00000196171	OR6K2			0					0				0		0	2.35225	2.2	2.4	2.4	0	0	0	0	0	0	0	0	0	0	0	0	0	0	0	0	0	0	0	0	0	0	0	olfactory receptor, family 6, subfamily K, member 2	81448	protein_coding
ENSG00000203757	OR6K3			0					0			10.4	2		0	0	0	0	0	0	0	0	0	0	0	0	0	0	0	0	0	0	0	0	0	0	0.5	0.3	0	0	4.5	16.3	olfactory receptor, family 6, subfamily K, member 3	391114	protein_coding
ENSG00000180433	OR6K6			0					0				0		0	0	0	0	0	0	0	0	0	0	0	0	0	0	0	0	0	0	0	0	0	0	0	0	0.2	0	0	0.5	olfactory receptor, family 6, subfamily K, member 6	128371	protein_coding
ENSG00000197403	OR6N1			0					0				0		0	0	0	0	0	0	0	0	0	0	0	0	0	0	0	0	0	0	0	0	0	0	0.2	0.8	0	0.3	0	0.5	olfactory receptor, family 6, subfamily N, member 1	128372	protein_coding
ENSG00000188340	OR6N2			0					0				0		0	0	0	0	0	0	0	0	0	0	0	0	0	0	0	0	0	0	0	0	0	0	0	0	0	0	0	0	olfactory receptor, family 6, subfamily N, member 2	81442	protein_coding
ENSG00000163563	MNDA			0					0			164.1	1		0	335.123	439.9	328.7	236.7	0.2	2.8	0.5	0.9	0	1.9	2.5	4	1.4	2.6	1.8	0.5	0.3	0.1	0.1	0.1	0	18.5	0.3	20.7	19.4	164.1	77.2	myeloid cell nuclear differentiation antigen	4332	protein_coding
ENSG00000163564	PYHIN1			0					0				0		0	16.1915	14.2	21.8	12.5	0	0	0	0.1	0.1	0.3	0	0	0	0	0.1	0	0	0	0	0	0	0	0.3	0	0.3	0	0	pyrin and HIN domain family, member 1	149628	protein_coding
ENSG00000163565	IFI16			0					0				0		0	529.496	640.5	512.9	435.1	2.3	4.8	0.9	2.4	2	1.2	1.3	7.7	4.5	6.3	3.2	3	0.7	1.2	0.7	1.6	0.1	10.6	4.6	50.8	74.1	20.9	14.2	interferon, gamma-inducible protein 16	3428	protein_coding
ENSG00000163568	AIM2			0					0				0		0	18.7726	18.5	18.5	19.3	0.1	0	0	0	0	0	0	0	0.2	0	0	0.1	0.1	0.8	0	0.2	0	0.3	0.3	0	0.3	0.3	0.2	absent in melanoma 2	9447	protein_coding
ENSG00000162706	CADM3			0					0				0		0	3.12324	1	2.4	6	0	0	0	0.2	0	0	0	0	0	0	0	0	0	0	0	0	0	0.2	0	0.4	0.6	0	0	cell adhesion molecule 3	57863	protein_coding
ENSG00000179639	FCER1A			0					0				0		0	238.625	201.6	240.9	273.4	1	1.3	0	1.2	1.6	0	1.3	0.5	1.6	3.7	6.5	0.9	0.6	1.1	0	0.5	0.3	1.5	2	0.9	39.7	0.9	1.7	Fc fragment of IgE, high affinity I, receptor for; alpha polypeptide	2205	protein_coding
ENSG00000196266	OR10J3			0					0				0		0	0	0	0	0	0	0	0	0	0	0	0	0	0	0	0	0	0	0	0	0	0	0	0	0	0.6	0	0	olfactory receptor, family 10, subfamily J, member 3	441911	protein_coding
ENSG00000249730	OR10J4			0					0				0		0	0	0	0	0	0	0	0	0	0	0	0	0	0	0	0	0	0	0	0	0	0	0.2	0	0	0.3	0	0.2	olfactory receptor, family 10, subfamily J, member 4 (gene/pseudogene)	NA	polymorphic_pseudogene
ENSG00000196184	OR10J1			0					0				0		0	55.16	38	61.9	65.5	0	0	0	0.1	0.1	0.2	1.4	0	0	0	0	0.2	0.3	0	0.1	0.1	0	0	0	0	0	0	0.5	olfactory receptor, family 10, subfamily J, member 1	26476	protein_coding
ENSG00000184155	OR10J5			0					0				0		0	0	0	0	0	0	0	0	0	0	0	0	0	0	0	0	0	0	0	0	0	0	0	0	0	0	0	0	olfactory receptor, family 10, subfamily J, member 5	127385	protein_coding
ENSG00000132703	APCS			0					0				0		0	7.14041	4.5	3.1	13.9	0	0	0	0	0	0	0	0	0	0	0	0	0.1	0	0	0	0	0	0	0	0	0	0	amyloid P component, serum	325	protein_coding
ENSG00000132693	CRP			0					0				0		0	0.667521	0.2	0.7	1.1	0	0	0	0	0	0	0	0	0	0	0	0	0	0	0	0	0	0	0	0	0	0	0	C-reactive protein, pentraxin-related	1401	protein_coding
ENSG00000158716	DUSP23			0					0				0		0	0	0	0	0	0	0	0	0	0	0	0	0	0	0	0	0	0	0	0	0	0	0	0	0	0	0	0.2	dual specificity phosphatase 23	54935	protein_coding
ENSG00000181036	FCRL6			0					0				0		0	11.2889	6.3	12.3	15.2	0	0.1	0	0.1	0	0	0	0.3	0.2	0	0	0	0.1	0	0	0	0	0.2	0	1.6	0	0.3	0.5	Fc receptor-like 6	343413	protein_coding
ENSG00000158714	SLAMF8			0					0				0		0	0.407215	0.2	0.5	0.5	0	0	0	0	0	0	0	0.7	0	0	0	0	0	0	0	0	0	0	0.3	0	0	0.3	0	SLAM family member 8	56833	protein_coding
ENSG00000188004	C1orf204			0					0				0		0	0	0	0	0	0	0	0	0	0	0	0	0	0	0	0	0	0	0	0	0	0	0	0	0	0	0	0	chromosome 1 open reading frame 204	284677	protein_coding
ENSG00000243284	VSIG8			0					0				0		0	0	0	0	0	0	0	0	0	0	0	0	0	0	0	0	0	0	0	0	0	0	0	0	0	0	0	0	V-set and immunoglobulin domain containing 8	391123	protein_coding
ENSG00000256029	RP11-190A12.7			0					0				0		0	0	0	0	0	0	0	0	0	0	0	0	0	0	0	0	0	0	0	0	0	0	0	0	0	0	0	0	Uncharacterized protein	NA	protein_coding
ENSG00000213085	CCDC19			0					0			1.2	1		0	3.97195	1.2	3.1	7.6	0	0	0	0	0	0	0	0	0	0	0	0	0	0	0	0	0	0.2	0	0.2	0	1.2	0	coiled-coil domain containing 19	25790	protein_coding
ENSG00000269620	AL590560.1			0					0				0		0	0	0	0	0	0	0	0	0	0	0	0	0	0	0	0	0	0	0	0	0	0	0	0	0	0	0	0	HCG1995379; Uncharacterized protein	NA	protein_coding
ENSG00000158710	TAGLN2			0					0				0		0	5.38223	4.7	7.1	4.3	0	0.1	0	0	0	0	0	0	0	0	0	0	0	0	0	0	0	0	0	0	0.6	0	0.2	transgelin 2	8407	protein_coding
ENSG00000085552	IGSF9			0					0			1.3	2		0	0	0	0	0	0	0	0	0	0	0	0	0	0	0	0	0	0	0	0	0	0	1.2	0.3	0.2	0.6	1.5	0.7	immunoglobulin superfamily, member 9	57549	protein_coding
ENSG00000162723	SLAMF9			0					0				0		0	0	0	0	0	0	0	0	0	0	0	0	0	0	0	0	0	0	0	0	0	0	0.5	0	0.2	0	0	0	SLAM family member 9	89886	protein_coding
ENSG00000143315	PIGM			0					0				0		0	41.665	36.6	40.8	47.6	0	0.4	0.3	0	0	0	0.3	0.2	0	1.4	1.9	0	0	0	0.1	0.6	0	1.7	0	0.2	0.6	0.3	1.2	phosphatidylinositol glycan anchor biosynthesis, class M	93183	protein_coding
ENSG00000177807	KCNJ10			0					0				0		0	2.46703	0.6	1.9	4.9	0	0	0	0	0	0	0	0	0.1	0	0	0	0	0	0	0	0	0.2	0	0	0	0	0	potassium inwardly-rectifying channel, subfamily J, member 10	3766	protein_coding
ENSG00000162728	KCNJ9			0					0				0		0	0	0	0	0	0	0	0	0	0	0	0	0	0	0	0	0	0	0	0	0	0	0.2	0	0	0	0	0	potassium inwardly-rectifying channel, subfamily J, member 9	3765	protein_coding
ENSG00000162729	IGSF8			0					0				0		0	0	0	0	0	0	0	0	0	0	0	0	0	0	0	0	0	0	0	0	0	0	0.3	0	0.2	0.3	0.3	0	immunoglobulin superfamily, member 8	93185	protein_coding
ENSG00000018625	ATP1A2			0					0			3	1		0	0.407047	0	0.9	0.3	0	0	0	0	0	0	0	0	0	0	0	0	0	0	0	0	0	1	3	0	0	0.6	0.5	ATPase, Na+/K+ transporting, alpha 2 polypeptide	477	protein_coding
ENSG00000132681	ATP1A4			0					0			665.2	4		0	6.26407	7.9	5.7	5.2	0	0	0.3	0	0.4	0	0	0	0.1	0	0	0	0	0	0	0	0	2637.3	0	0.9	19.7	2.1	1.7	ATPase, Na+/K+ transporting, alpha 4 polypeptide	480	protein_coding
ENSG00000143318	CASQ1			0					0				0		0	21.7515	16.3	20.2	28.8	0.1	0.4	0	0	0	0	0	0	0	0	0.4	0	0.1	0	0	0	0	0.7	0	0	0.6	1.5	0	calsequestrin 1 (fast-twitch, skeletal muscle)	844	protein_coding
ENSG00000258465	DCAF8			0					0				0		0	0	0	0	0	0	0	0	0	0	0	0	0	0	0	0	0	0	0	0	0	0	0.2	0	0	0	0	0	DDB1- and CUL4-associated factor 8	50717	protein_coding
ENSG00000162735	PEX19			0					0				0		0	8.86769	5.5	10	11.1	0.1	0	0	0.3	0	0	0	0	0	0	0	0	0	0	0	0	0	0	0	0	0.3	0.3	0.5	peroxisomal biogenesis factor 19	5824	protein_coding
ENSG00000122218	COPA			0					0				0		0	49.709	41.3	64.1	43.8	0	0.8	0.3	0	0.2	0	0.9	1.5	0.3	0.7	0.2	0.1	0.1	0.3	0	0.4	0	1.5	0.5	1.4	1.5	0	1.4	coatomer protein complex, subunit alpha	1314	protein_coding
ENSG00000162736	NCSTN			0					0			70.4	1		0	76.8332	46	90	94.6	0.5	4.9	0.3	0.3	0.1	0.3	0	1.2	0.3	1.4	0.4	0.6	0.1	0.3	0	0	0	1.8	0.3	2.7	3.9	0.9	70.4	nicastrin	23385	protein_coding
ENSG00000171786	NHLH1			0					0				0		0	0	0	0	0	0	0	0	0	0	0	0	0	0	0	0	0	0	0	0	0	0	0	0.3	0	0	0	0	nescient helix loop helix 1	4807	protein_coding
ENSG00000162738	VANGL2			0					0				0		0	0	0	0	0	0	0	0	0	0	0	0	0	0	0	0	0	0	0	0	0	0	0.3	0.8	0	0	0	0	VANGL planar cell polarity protein 2	57216	protein_coding
ENSG00000162739	SLAMF6			0					0				0		0	54.2765	57.6	40.6	64.7	0	0	0.2	0.2	0	0	0.5	2.1	0	0	0	0	0	0	0.1	0	0	0	0.3	0.2	0	0	0	SLAM family member 6	114836	protein_coding
ENSG00000066294	CD84			0					0				0		0	2.16029	0	4	2.4	0	0	0	0	0	0	0	0	0	0	0	0	0	0	0	0	0	0	0	0	0	0	0.2	CD84 molecule	8832	protein_coding
ENSG00000117090	SLAMF1			0					0				0		0	11.3683	5.1	13.5	15.5	0	0	0	0	0.1	0	0.2	1.5	0.1	0	0	0.5	0	0	0	0	0	2.3	0	1.4	0	0	0	signaling lymphocytic activation molecule family member 1	6504	protein_coding
ENSG00000117091	CD48			0					0				0		0	136.845	93.2	152.1	165.2	0	1.2	0.3	0.5	0.1	0.5	0.4	4.6	0.5	1	0.6	0.3	0.3	1.3	0.1	0.2	0.1	0.2	7.9	1.1	4.5	0	0.5	CD48 molecule	962	protein_coding
ENSG00000026751	SLAMF7			0					0				0		0	0.0905969	0	0	0.3	0	0.1	0	0	0	0	0	0	0	0	0	0	0	0	0	0	0	0.2	0	0	0	0	0	SLAM family member 7	57823	protein_coding
ENSG00000122224	LY9			0					0			1.7	1		0	1.33393	0.6	2.8	0.5	0	0	0	0.2	0	0	0	0	0	0	0	0	0	0	0	0	0	0.2	0.5	0	0	0.3	1.7	lymphocyte antigen 9	4063	protein_coding
ENSG00000122223	CD244			0					0				0		0	11.2405	7.9	15.2	10.6	0	0	0	0	0	0	0	0	0	0.3	0.2	0.1	0.1	0	0	0	0	0	0	0	0	0.3	0	CD244 molecule, natural killer cell receptor 2B4	51744	protein_coding
ENSG00000179914	ITLN1			0					0				0		0	35.2563	28.1	32	45.7	0.1	0	0	0.3	0.1	0	0.2	3.8	0	0.5	0	0.2	0.1	0.3	0	0.3	0	0	0	0	2.1	1.5	1.4	intelectin 1 (galactofuranose binding)	55600	protein_coding
ENSG00000158764	ITLN2			0					0				0		0	19.3145	21.2	18	18.8	0	0	0	0.6	0.1	0	0.5	0	0.2	0	0.1	0	0.3	0	0	0.1	0	0.2	0	0	3.3	0	0	intelectin 2	142683	protein_coding
ENSG00000158769	F11R			0					0				0		0	28.0289	21.8	25.6	36.7	0	0	0	1.2	0	4.7	0	1.5	0	0	0	0	0.1	0	0	0	0	0.2	0.5	0	1.5	0.3	0	F11 receptor	50848	protein_coding
ENSG00000270149	RP11-544M22.13			0					0				0		0	0	0	0	0	0	0	0	0	0	0	0	0	0	0	0	0	0	0	0	0	0	0	0	0	0	0	0.2	Uncharacterized protein	NA	protein_coding
ENSG00000215845	TSTD1			0					0				0		0	0.260306	0	0.2	0.5	0	0	0	0	0	0	0	0	0	0	0	0	0	0	0	0	0	0	0	0	0	0	0	thiosulfate sulfurtransferase (rhodanese)-like domain containing 1	100131187	protein_coding
ENSG00000158773	USF1			0					0				0		0	2.38609	3.1	1.7	2.4	0	0	0	0	0	0	0	0	0	0	0.1	0	0	0	0.1	0	0	0.3	0	0	0	0.3	0.2	upstream transcription factor 1	7391	protein_coding
ENSG00000186517	ARHGAP30			0					0				0		0	2.19386	2	2.4	2.2	0	0	0	0	0	0	0	0	0	0	0	0	0	0	0	0	0	0.3	0.3	0	0.6	0.9	0	Rho GTPase activating protein 30	257106	protein_coding
ENSG00000268154	AL591806.1			0					0				0		0	0	0	0	0	0	0	0	0	0	0	0	0	0	0	0	0	0	0	0	0	0	0	0	0	0	0	0	Uncharacterized protein	NA	protein_coding
ENSG00000143217	PVRL4			0					0				0		0	0	0	0	0	0	0	0	0	0	0	0	0	0	0	0	0	0	0	0	0	0	0.5	0.5	0	0	0.3	0	poliovirus receptor-related 4	81607	protein_coding
ENSG00000162755	KLHDC9			0					0				0		0	14.0254	7.1	17.6	17.4	0.1	0	0	0.1	0	0	0	0.8	0.1	0	0	0.9	0	0	0	0	0	0.2	0	0	0.3	0	0.2	kelch domain containing 9	126823	protein_coding
ENSG00000158793	NIT1			0					0			11.4	1		0	8.31151	5.7	11.6	7.6	0	0	0	0	0	0	0	0	0.8	0	0.6	0	0	0	0	0	0	11.4	1	0.9	0	0	0.2	nitrilase 1	4817	protein_coding
ENSG00000158796	DEDD			0					0			40.3	1		0	13.223	8.9	13.1	17.7	0	0	0	0.2	0.1	0	0	0	0	0	0.2	0.1	0	0	0	0.1	0	2.3	0.5	3.2	0	40.3	0	death effector domain containing	9191	protein_coding
ENSG00000143222	UFC1			0					0			7581.4	6		0	548.514	389.7	551.1	704.8	8.1	34.3	1.5	3.5	1.3	6.4	3.2	35.4	5.1	8.4	7.7	1.7	4.2	4	1.7	1.5	0.5	17876.8	4236.2	8731	928.8	11657.6	2058	ubiquitin-fold modifier conjugating enzyme 1	51506	protein_coding
ENSG00000143258	USP21			0					0			121.3	1		0	20.7069	19.9	20.2	22	0	0.1	0	0.3	0	0.1	0	0	0	0	0	0.1	0.1	0	0	0	0	121.3	0	0.2	1.2	0	1.4	ubiquitin specific peptidase 21	27005	protein_coding
ENSG00000143224	PPOX			0					0			596.3	6		0	9.50237	6.1	8.5	13.9	0	0	0	0	0	0	0	0.2	0	0	0	0	0	0	0	0	0	57.7	158.2	29.4	3213.9	41.2	77.2	protoporphyrinogen oxidase	5498	protein_coding
ENSG00000158859	ADAMTS4			0					0				0		0	0	0	0	0	0	0	0	0	0	0	0	0	0	0	0	0	0	0	0	0	0	0.2	0	0	0	0.3	0.5	ADAM metallopeptidase with thrombospondin type 1 motif, 4	9507	protein_coding
ENSG00000158864	NDUFS2			0					0			248.9	3		0	43.3405	33.6	45.1	51.4	0.3	0.4	0	0.9	0	0	0	0	0	0.3	0	0	0.1	0	0	0	0	9.9	397.1	327.2	10.2	2.1	22.4	NADH dehydrogenase (ubiquinone) Fe-S protein 2, 49kDa (NADH-coenzyme Q reductase)	4720	protein_coding
ENSG00000158869	FCER1G			0					0				0		0	67.5483	32.7	69.1	100.8	0	3.5	0	0.7	0	0.3	0.7	2.8	1.1	1.9	0	0.8	0.4	0.3	0.4	0.8	0.1	2.1	0	2.1	10.2	4.8	2.4	Fc fragment of IgE, high affinity I, receptor for; gamma polypeptide	2207	protein_coding
ENSG00000268387	AL590714.1			0					0			43.1	3		0	1.65105	1.4	1.9	1.6	0	0	0	0	0	0	0	0	0	0	0	0	0	0	0	0	0	1.3	12.4	115.5	0.3	0	0	Uncharacterized protein	NA	protein_coding
ENSG00000158874	APOA2			0					0			144.6	3		0	2.48723	3.5	2.4	1.6	0	0	0	0	0	0	0	0.2	0	0	0	0	0	0	0	0.1	0	4.6	41.3	388	0.6	0	1	apolipoprotein A-II	336	protein_coding
ENSG00000158882	TOMM40L			0					0				0		0	0.39573	0.2	0.7	0.3	0	0	0	0	0	0	0	0	0	0	0	0	0	0	0	0	0	0.2	0	0	0	0.3	0.2	translocase of outer mitochondrial membrane 40 homolog (yeast)-like	84134	protein_coding
ENSG00000143257	NR1I3			0					0				0		0	19.5018	10	21.4	27.2	0.2	0.5	0	0.1	0	0.3	0	0.3	0	0.5	0.1	0	0	0	0	0	0	0.8	0	0.5	1.8	1.5	3.1	nuclear receptor subfamily 1, group I, member 3	9970	protein_coding
ENSG00000248485	PCP4L1			0					0				0		0	1.34542	0.6	2.6	0.8	0	0	0	0	0	0	0	0	0.1	0.7	0	0	0	0	0	0	0	0	0.3	0.2	0	0	0	Purkinje cell protein 4 like 1	654790	protein_coding
ENSG00000158887	MPZ			0					0				0		0	0	0	0	0	0	0	0	0	0	0	0	0	0	0	0	0	0	0	0	0	0	0	0	0.4	0	0	0	myelin protein zero	4359	protein_coding
ENSG00000143252	SDHC			0					0				0		0	29.2978	19.3	27.5	41	0.5	0.5	0.5	0.2	0	0.1	0	1.2	0	0	0.2	0	0.1	0.2	0	0.2	0.1	0.5	1	0	1.8	0.6	0.7	succinate dehydrogenase complex, subunit C, integral membrane protein, 15kDa	6391	protein_coding
ENSG00000188931	C1orf192			0					0				0		0	41.3995	31.7	37	55.4	0	0	0.3	0.2	0.1	0.2	0.8	2.1	0.4	0.2	0.1	0.3	0	0.3	0	0.8	0.1	0.2	0	0.4	1.2	0.6	1.2	chromosome 1 open reading frame 192	257177	protein_coding
ENSG00000143226	FCGR2A			0					0				0		0	25.4511	29.3	27.8	19.3	0.1	1.2	0	0.1	0.1	0.4	0	5.9	0.1	0	0.6	0	0.1	0.1	0	0.1	0	0.3	0	0.4	0	0.3	0	Fc fragment of IgG, low affinity IIa, receptor (CD32)	2212	protein_coding
ENSG00000173110	HSPA6			0					0				0		0	0	0	0	0	0	0	0	0	0	0	0	0	0	0	0	0	0	0	0	0	0	0.2	0	0.2	0.3	0	0	heat shock 70kDa protein 6 (HSP70B')	3310	protein_coding
ENSG00000203747	FCGR3A			0					0			32.4	2		0	40.241	41.3	48.2	31.3	0	1.3	0.2	0	0.4	0.1	0.2	1	0	0	0	0.1	0	0	0	0.1	0	1.5	0	0.7	1.8	52.4	12.5	Fc fragment of IgG, low affinity IIIa, receptor (CD16a)	2214	protein_coding
ENSG00000072694	FCGR2B			0					0				0		0	9.20821	5.3	9	13.3	0	0.1	0.2	0	0.1	0	0	0	0.4	0	0	0	0.1	0	0	0.2	0	0.3	0	0	0	0	0	Fc fragment of IgG, low affinity IIb, receptor (CD32)	2213	protein_coding
ENSG00000244682	FCGR2C			0					0				0		0	9.59086	9.8	7.6	11.4	0	0	0	0.1	0.1	0.3	0	1.3	0.3	0	0.1	0	0	0	0	0	0	0	0	0	0.3	0	0	Fc fragment of IgG, low affinity IIc, receptor for (CD32) (gene/pseudogene)	9103	polymorphic_pseudogene
ENSG00000162747	FCGR3B			0					0				0		0	1.99097	2	0.9	3	0	0	0	0	0	0	0	0.7	0	0	0	0	0	0	0	0	0	0	0	0	0	0	0	Fc fragment of IgG, low affinity IIIb, receptor (CD16b)	2215	protein_coding
ENSG00000132185	FCRLA			0					0				0		0	0	0	0	0	0	0	0	0	0	0	0	0	0	0	0	0	0	0	0	0	0	0	0	0	0	0.3	0	Fc receptor-like A	84824	protein_coding
ENSG00000162746	FCRLB			0					0				0		0	0	0	0	0	0	0	0	0	0	0	0	0	0	0	0	0	0	0	0	0	0	0.3	0	0	0.3	0.3	0	Fc receptor-like B	127943	protein_coding
ENSG00000081721	DUSP12			0					0			56.4	1		0	38.6037	51.9	29.4	34.5	0.2	0	0	0.5	0	0	0.8	0.5	1.1	0.7	0.5	0	0	0	0	0	0	56.4	0.5	0.9	1.5	3.3	0.2	dual specificity phosphatase 12	11266	protein_coding
ENSG00000118217	ATF6			0					0			365.3	2		0	141.069	167.2	136.7	119.3	1.2	13.9	1.4	0.2	0.4	0	0	1.8	1.6	1.7	4.8	0.8	0.3	0.7	0	0.4	0	565.3	0.3	1.8	165.3	27.9	10.6	activating transcription factor 6	22926	protein_coding
ENSG00000162745	OLFML2B			0					0			1.2	1		0	3.90216	3.3	3.6	4.9	0	0	0	0	0	0	0	0.2	0	0	0.2	0	0	0.1	0	0	0	0	0	0.2	0.9	0	1.2	olfactomedin-like 2B	25903	protein_coding
ENSG00000198929	NOS1AP			0					0				0		0	0	0	0	0	0	0	0	0	0	0	0	0	0	0	0	0	0	0	0	0	0	0	0	0.4	0	0	0	nitric oxide synthase 1 (neuronal) adaptor protein	9722	protein_coding
ENSG00000254706	RP11-565P22.6			0					0				0		0	0	0	0	0	0	0	0	0	0	0	0	0	0	0	0	0	0	0	0	0	0	0	0	0	0	0	0	Uncharacterized protein	NA	protein_coding
ENSG00000239887	C1orf226			0					0				0		0	0	0	0	0	0	0	0	0	0	0	0	0	0	0	0	0	0	0	0	0	0	0.2	0.3	0	0	0	0.2	chromosome 1 open reading frame 226	400793	protein_coding
ENSG00000171722	C1orf111			0					0			29.4	2		0	26.4457	17.5	27.1	34.8	0	0	0	0	0	0	0	3.5	0.2	0.3	0.2	0	0.1	0	0	0.1	0	1.5	0	0	41.8	17	3.1	chromosome 1 open reading frame 111	284680	protein_coding
ENSG00000198574	SH2D1B			0					0				0		0	3.8433	3.1	7.1	1.4	0	0	0	0	0	0	0.1	0	0	0	0	0	0	0	0	0	0	0.7	0.3	0	0	0.6	0	SH2 domain containing 1B	117157	protein_coding
ENSG00000152332	UHMK1			0					0				0		0	18.4108	17.7	18.5	19	0	0.5	0	0	0	0	0	1.3	1.3	0.3	0	0	0.3	0.1	0	0.1	0.1	0.3	0.3	4.2	2.4	0	0	U2AF homology motif (UHM) kinase 1	127933	protein_coding
ENSG00000117143	UAP1			0					0			1216.5	4		0	382.917	430.6	399.9	318.3	1.1	4.9	0.2	1	4	1.3	7.4	16.8	2.6	6.3	5.3	0.3	0.7	1.8	0.2	0.4	0	3323.1	922.6	242.6	71.1	377.5	69.2	UDP-N-acteylglucosamine pyrophosphorylase 1	6675	protein_coding
ENSG00000162733	DDR2			0					0				0		0	61.1933	32.1	55.8	95.7	0	1.8	0	0	0	0	0	2.1	0.3	0.9	0.2	0.2	0	0.3	0	0.1	0	0.3	1	1.6	2.1	1.5	1	discoidin domain receptor tyrosine kinase 2	4921	protein_coding
ENSG00000132196	HSD17B7			0					0				0		0	1.59524	1.8	0.2	2.7	0	0	0	0	0	0	0	0	0	0	0	0	0.4	0.3	0	0	0	0.3	0	0.2	0.9	0.3	0.2	hydroxysteroid (17-beta) dehydrogenase 7	51478	protein_coding
ENSG00000185860	C1orf110			0					0				0		0	15.5629	13.2	14.7	18.8	0	0	0	0	0.1	0	0	0	0	0.3	0	0	0	0.2	0	0.3	0	0.3	0	0	1.2	0.6	0	chromosome 1 open reading frame 110	339512	protein_coding
ENSG00000117152	RGS4			0					0				0		0	87.9255	73.8	84.5	105.5	2.5	2.2	1.8	0.1	2	0.1	0.2	10.4	0.9	2.4	0	1.6	0.1	1.4	0	0.9	0	1.8	0	5.1	9.6	0.3	0.2	regulator of G-protein signaling 4	5999	protein_coding
ENSG00000143248	RGS5			0					0				0		0	558.665	418.2	563.7	694.2	2.2	8.6	0.3	2.4	0.6	0.9	2.7	13.8	3.2	2.4	7.2	2.3	2.3	1	1.7	1.3	0.2	1.5	0.5	2.1	5.4	0.3	4.8	regulator of G-protein signaling 5	8490	protein_coding
ENSG00000143228	NUF2			0					0				0		0	85.4294	106.2	89.2	60.9	1.1	6.3	0.5	1	1.1	0.8	0.9	6.6	1.4	1.9	1.6	0.1	0.7	0.3	0.1	0.5	0	4	0.3	0.7	4.8	0.9	2.6	NUF2, NDC80 kinetochore complex component	83540	protein_coding
ENSG00000185630	PBX1			0					0				0		0	41.0584	31.3	39.4	52.5	0.1	0.4	0	0.3	0	0.2	0.1	0.2	0.1	1	0.5	0.1	0.3	0	0.2	0.2	0.1	0.8	0	0.7	2.1	0	0	pre-B-cell leukemia homeobox 1	5087	protein_coding
ENSG00000162761	LMX1A			0					0				0		0	8.75512	6.7	7.6	12	0	0	0	0.5	0	0.1	0	0	0	0	0	0.1	0	0	0	0	0	0.2	0.3	0.2	0.3	0.6	0.2	LIM homeobox transcription factor 1, alpha	4009	protein_coding
ENSG00000143171	RXRG			0					0				0		0	0.543582	0	0	1.6	0	0	0	0	0	0	0	0	0	0	0	0	0	0	0	0	0	0	0.5	0	0	0	0	retinoid X receptor, gamma	6258	protein_coding
ENSG00000162763	LRRC52			0					0			81	3		0	1.93267	4.1	1.2	0.5	0	0	0	0	0.1	0	0	0	0	0	0	0.3	0	0	0	0	0	2.3	0.3	4.4	236.4	0	0.7	leucine rich repeat containing 52	440699	protein_coding
ENSG00000143198	MGST3			0					0				0		0	216.549	127.1	195.6	327	2.2	5.8	0.2	1.1	1.3	0.6	1.4	1.5	5.3	12.6	4.1	3.8	1.7	2.3	1	2.8	0.2	12.4	1	5.1	18.2	1.2	8.7	microsomal glutathione S-transferase 3	4259	protein_coding
ENSG00000143149	ALDH9A1			0					0			139.7	4		0	264.313	239	295.5	258.5	0.2	3.2	0.3	0.9	1.6	0.3	1.6	4.6	2	3.6	1.2	0.3	1.3	1.7	0.9	0.4	0.1	105.1	10.1	72.8	3.3	311.5	69.5	aldehyde dehydrogenase 9 family, member A1	223	protein_coding
ENSG00000143183	TMCO1			0					0			338.6	1		0	897.972	879.2	876.7	937.9	4.3	11	2.3	2.7	4	1.2	5.8	14.2	9.7	7.7	18.2	0.8	1.2	4.5	0.9	4.1	0.3	16.4	14.7	14	338.6	118.7	119.9	transmembrane and coiled-coil domains 1	54499	protein_coding
ENSG00000143179	UCK2			0					0				0		0	3.13145	3.3	4.5	1.6	0	0	0	0	0	0	0	0	0	0	0.3	0	0	0	0	0	0	0.2	0	0	0.3	0	0.5	uridine-cytidine kinase 2	7371	protein_coding
ENSG00000188859	FAM78B			0					0				0		0	0.316785	0.4	0	0.5	0	0	0	0	0	0	0	0	0	0	0	0	0	0	0	0	0	0	0	0	0	0	0	family with sequence similarity 78, member B	149297	protein_coding
ENSG00000267884	AL626787.1			0					0				0		0	0	0	0	0	0	0	0	0	0	0	0	0	0	0	0	0	0	0	0	0	0	0.2	0	0	0	0	0.2		NA	protein_coding
ENSG00000143157	POGK			0					0				0		0	2.61411	1	1.7	5.2	0	0	0	0	0	0	0	0	0	0	0	0	0	0	0	0	0	0.2	0	0	0	0	0.5	pogo transposable element with KRAB domain	57645	protein_coding
ENSG00000152382	TADA1			0					0			27.2	4		0	45.6373	46	51.3	39.7	0.3	1.8	0	3	0.1	0	0.8	0.5	0	0.3	0.2	0	0	0	0	0.1	0	14.9	2.8	49.4	16.7	1.5	27.6	transcriptional adaptor 1	117143	protein_coding
ENSG00000143195	ILDR2			0					0				0		0	0	0	0	0	0	0	0	0	0	0	0	0	0	0	0	0	0	0	0	0	0	0.5	0.3	0.2	0.6	0.6	0.2	immunoglobulin-like domain containing receptor 2	387597	protein_coding
ENSG00000143194	MAEL			0					0			671.1	1		0	422.083	458.6	461.6	346	0.8	4.8	0.3	2.2	1.2	1.6	1.2	15.2	6.5	8	22	2.1	0.6	4	0.2	1.3	0	24.3	8.4	7.6	12	51.2	671.1	maelstrom spermatogenic transposon silencer	84944	protein_coding
ENSG00000143167	GPA33			0					0				0		0	0	0	0	0	0	0	0	0	0	0	0	0	0	0	0	0	0	0	0	0	0	0.2	0	0	0.3	0	0	glycoprotein A33 (transmembrane)	10223	protein_coding
ENSG00000198842	DUSP27			0					0			1.2	1		0	0	0	0	0	0	0	0	0.1	0	0	0	0	0	0	0	0	0	0	0	0	0	0.2	0.3	0	0	1.2	0.5	dual specificity phosphatase 27 (putative)	92235	protein_coding
ENSG00000143190	POU2F1			0					0				0		0	9.1589	8.9	10.9	7.6	0	0	0	0	0.1	0	0.9	1	0	0	0	0	0	0	0	0	0	0	0	0	0.9	0.3	0.5	POU class 2 homeobox 1	5451	protein_coding
ENSG00000198821	CD247			0					0				0		0	0	0	0	0	0	0	0	0	0	0	0	0	0	0	0	0	0	0	0	0	0	0.2	0	0	0	0	0	CD247 molecule	919	protein_coding
ENSG00000143162	CREG1			0					0				0		0	43.8215	46	40.1	45.4	0.2	0.4	0	0.3	0.1	0.3	0.2	0	0.2	0.3	0.4	0.2	0.1	0.2	0	0	0	7.4	0.3	0.5	0.9	6.7	0.5	cellular repressor of E1A-stimulated genes 1	8804	protein_coding
ENSG00000198771	RCSD1			0					0				0		0	0.327935	0	0.7	0.3	0	0	0	0	0	0	0	0	0	0	0	0	0	0	0	0	0	0.3	0	0.2	0	0	0	RCSD domain containing 1	92241	protein_coding
ENSG00000197965	MPZL1			0					0				0		0	10.7095	12.4	8.3	11.4	0.1	0	0	0	0.2	0	0	0	0	0	0	0	0.1	0	0	0	0	0.2	0.3	0	0	0	0	myelin protein zero-like 1	9019	protein_coding
ENSG00000143199	ADCY10			0					0			96.9	1		0	66.8765	63	74.5	63.1	0.3	0	1.1	0.2	1.3	0.1	0.4	4	0	0	1	0.5	0.3	0	0	0	0	1.3	0	1.1	11.7	96.9	0.5	adenylate cyclase 10 (soluble)	55811	protein_coding
ENSG00000143158	MPC2			0					0			37	1		0	77.6296	97.4	61	74.5	0.6	0	0	0	0.3	0.1	0.1	0.7	0.3	1.4	0	0	0.3	1.2	0	0.2	0	1.5	0.8	0.7	0.6	4.2	37	mitochondrial pyruvate carrier 2	25874	protein_coding
ENSG00000143164	DCAF6			0					0			1244	3		0	599.255	578.2	600.9	618.6	1.8	6.8	1.1	0.7	0.4	2.1	5.1	9.7	5.4	4.1	8.1	2	0.4	5.5	0.1	1.8	0.4	61.7	64.9	630.6	41.8	2879.8	221.6	DDB1 and CUL4 associated factor 6	55827	protein_coding
ENSG00000143147	GPR161			0					0				0		0	0.328102	0.2	0.2	0.5	0	0	0	0	0	0	0	0	0.1	0	0	0	0	0	0	0	0	0	0	0	0	0	0	G protein-coupled receptor 161	23432	protein_coding
ENSG00000143155	TIPRL			0					0			147.8	1		0	84.3795	95.6	62.4	95.1	2.7	1.7	0.5	0	0.2	0	0	2.6	2.9	0.7	1	0.2	0.1	0.1	0	1.7	0.1	147.8	0	0	0.3	0	4.1	TIP41, TOR signaling pathway regulator-like (S. cerevisiae)	261726	protein_coding
ENSG00000213064	SFT2D2			0					0				0		0	6.68393	4.9	7.8	7.3	0	0	0	0	0	0	0	0	0	0	0	0	0	0	0	0	0	0	0	0	0	0	0	SFT2 domain containing 2	375035	protein_coding
ENSG00000143178	TBX19			0					0				0		0	0	0	0	0	0	0	0	0	0	0	0	0	0	0	0	0	0	0	0	0	0	1	0.5	0.2	0.3	0.3	0.2	T-box 19	9095	protein_coding
ENSG00000143185	XCL2			0					0				0		0	0.214704	0.4	0.2	0	0	0	0	0	0	0	0	0	0	0	0	0	0	0	0	0	0	0	0	0	0	0	0	chemokine (C motif) ligand 2	6846	protein_coding
ENSG00000143184	XCL1			0					0				0		0	0.237338	0	0.7	0	0	0	0	0	0	0	0	0	0	0	0	0	0	0	0	0	0	0	0	0	0.3	0	0	chemokine (C motif) ligand 1	6375	protein_coding
ENSG00000143196	DPT			0					0			56.1	1		0	72.7377	71.4	89.5	57.3	0	0	0	0	0.1	0	0.2	2	0.5	3.7	1.1	0.6	0.1	0.2	0	0	0	8.9	0	56.1	9.9	2.4	5.3	dermatopontin	1805	protein_coding
ENSG00000143153	ATP1B1			0					0			23213.3	6		0	656.747	621.1	691.4	657.7	7.5	10.2	4	5.1	4.8	0.9	3	27.7	5.2	28.8	4.5	3.6	1.6	7.4	0.6	2.7	0.2	13906.6	77839.2	17321.4	233.1	17077.8	12901.8	ATPase, Na+/K+ transporting, beta 1 polypeptide	481	protein_coding
ENSG00000143156	NME7			0					0				0		0	428.743	493.4	387.6	405.2	3.6	1	2	4.4	0	0.4	1.6	4.6	29	5.8	9.2	2	0.7	0.3	0.5	0.8	0.1	18.3	1.3	64.5	18.8	43.9	11.1	NME/NM23 family member 7	29922	protein_coding
ENSG00000117475	BLZF1			0					0			93	1		0	307.56	370.6	336.3	215.8	0.9	0.3	0.2	0.1	0.2	0.4	6.5	1.3	1	1.4	2.1	0.5	0.7	0.7	0.5	0.4	0	6.8	1.8	3.7	5.4	70.2	93	basic leucine zipper nuclear factor 1	8548	protein_coding
ENSG00000117477	CCDC181			0					0			172	2		0	342.116	356.3	312.3	357.7	2.6	36.4	0.9	1.6	1.7	0	1.1	12.2	2.5	6	3.9	1.8	1	0.2	0.1	0	0.4	8.9	0.5	1.6	159.9	184.1	17.8	coiled-coil domain containing 181	57821	protein_coding
ENSG00000117479	SLC19A2			0					0				0		0	9.40778	10.6	9.5	8.2	0	0	0.2	0	0	0	0	0	0	0	0.1	0	0	0	0	0	0	0	0	0.5	0.6	0	0.7	solute carrier family 19 (thiamine transporter), member 2	10560	protein_coding
ENSG00000198734	F5			0					0				0		0	39.3695	38.2	50.8	29.1	0	0	0.5	0	1	0	0	0	8.5	0.3	0	0.7	0	0	0.2	0	0	2.8	0	0.2	2.4	0	0.5	coagulation factor V (proaccelerin, labile factor)	2153	protein_coding
ENSG00000174175	SELP			0					0			89.2	3		0	33.7574	27.1	39.2	35.1	0	0.1	0	1.8	0	0	0.3	0	0	1.9	0.6	0	0	0	0	0	0.1	4.3	0.3	1.2	46	163.5	58.2	selectin P (granule membrane protein 140kDa, antigen CD62)	6403	protein_coding
ENSG00000000460	C1orf112			0					0			64.8	1		0	132.393	102.1	142.9	152.2	0.2	0.8	0.2	0.1	0	0.4	0	0.2	0.7	2.7	0.2	0.1	0	0.6	0.5	0	0.1	64.8	0.8	3.2	1.2	0	0.2	chromosome 1 open reading frame 112	55732	protein_coding
ENSG00000188404	SELL			0					0				0		0	118.915	94.4	137.9	124.5	0	0.4	0	0.1	0.2	0.3	1.1	3	0.7	2.7	4.6	0	0.3	0	0	0	0	2.1	0	0.7	2.4	0.3	0	selectin L	6402	protein_coding
ENSG00000007908	SELE			0					0				0		0	4.73784	4.7	5.5	4.1	0.3	0	0	0	0	0	0	0	0	0	0	0	0	0	0	0	0	0.3	0	0.2	0	0.3	0.2	selectin E	6401	protein_coding
ENSG00000171806	METTL18			0					0				0		0	213.096	242.2	217.4	179.7	1.9	8.9	0	1	3.4	0.3	0.4	3.3	0.9	1.7	2.2	0	1	0.2	0.1	0.3	0	3	16	4.8	12.8	0.6	44.7	methyltransferase like 18	92342	protein_coding
ENSG00000000457	SCYL3			0					0				0		0	66.8465	57.6	74.8	68.2	0	6.2	0	0.4	0	3.6	0	0	0.3	0.3	1.1	0	0	0.3	0	0.1	0	0.5	1.3	4.1	6.6	0.6	0.5	SCY1-like 3 (S. cerevisiae)	57147	protein_coding
ENSG00000075945	KIFAP3			0					0				0		0	428.435	464.5	423.4	397.4	3.4	10.8	1.4	2.9	0.7	0.4	3.5	24.1	3.3	8.4	4.4	2.3	2.3	1.5	0.2	2.1	0.4	9.6	2	3.7	16.1	3.3	1.4	kinesin-associated protein 3	22920	protein_coding
ENSG00000203740	METTL11B			0					0				0		0	5.42645	5.7	7.6	3	0.2	0	0	0	0	0	0	0	0	0	0	0	0	0	0	0.2	0	0	0	0.2	0.3	0	0	methyltransferase like 11B	149281	protein_coding
[truncated: 21,395 more rows]
